# Supplementary material for: AI-Driven Prediction Unveils SMAD4-Specific HLA-Restricted Epitopes: A Novel Therapeutic Target for Precision Treatment of Peritoneal Metastasis in Colorectal Cancer
Source: Research Square preprint supplement (doi:10.21203/rs.3.rs-7066314/v1), 2025-08-14
Supplement: Supplementary file 1 [file c574bb7e02f8901e5a37e107.xlsx]

## Sheet: Table S1
Table S1：Clinical Data of CRC-PM and CRC Patients
	CRC-PM					CRC
	crc_eo_2020	crc_msk_2017	Lenos et.al	Yaeger et.al		crc_eo_2020
N	55	8	52	9		694
Age (years)
Mean ± SD	54.6±14.6	40.1±12.0	63.2±10.0	/		50.5±13.7
Gender
Male	29	6	25	5		375
Female	24	2	27	4		288
NA	2	0	0	0		31
Race Category
White	48	/	52	/		694
Asian	7	/	0	/		0
NA	0	8	0	9		0													1
Location primary tumor
Appendix	0	0	3	/		0
Right colon	22	5	19	/		178
Transverse colon	0	0	2	/		0
Left colon	29	3	7	/		281
Sigmoid colon	0	0	16	/		0
Rectum	2	0	2	/		204
Not specified	2	0	3	9		31
MSI Type
Do not report	1	0	/	/		7
Indeterminate	1	0	/	/		13
Instable	5	1	/	/		86
Stable	48	0	/	/		588
NA	0	7	52	9		0

## Sheet: Table S2 
Table S2: Somatic mutations identified by next-generation sequencing (NGS) in CRC-PM and CRC patients
Patient ID	Gender	APC	CTNNB	KRAS	SMAD4	NRAS	BRAF	TP53	PIK3CA	PTEN	RNF43	FBXW7	Ref
1	Female	E1309STOP		G12D									Lenos KJ et.al
2	Female	R805STOP		G12V				R213STOP					Lenos KJ et.al
3	Male												Lenos KJ et.al
4	Female							R248Q					Lenos KJ et.al
5	Male												Lenos KJ et.al
6	Female			G12D				R273C				R465C	Lenos KJ et.al
7	Male						V600E						Lenos KJ et.al
8	Male						V600E					R278STOP	Lenos KJ et.al
9	Male		D32G	G12D					E542K				Lenos KJ et.al
10	Female					Q61K		R248Q					Lenos KJ et.al
11	Male	Q1294STOP		G12D				G245D					Lenos KJ et.al
12	Male	[STOP] AA 1511 (E16/2573)		G12D;Q61H									Lenos KJ et.al
13	Female			G12D									Lenos KJ et.al
14	Female							E204STOP					Lenos KJ et.al
15	Male			G12D				860_866del		D107Y			Lenos KJ et.al
16	Female				R361C								Lenos KJ et.al
17	Female			G13D				C275W					Lenos KJ et.al
18	Female			G13D	D351G			R248Q	E545K				Lenos KJ et.al
19	Female	R564STOP						R282W					Lenos KJ et.al
20	Female	R -> [STOP] (805)		G12D	G358del; L364F			R175G					Lenos KJ et.al
21	Female			G12V				R175H	E545G		R117H		Lenos KJ et.al
22	Male			G12C									Lenos KJ et.al
23	Male	R876STOP		G12C				R306STOP					Lenos KJ et.al
24	Female			G12D				K132N					Lenos KJ et.al
25	Male							C242S					Lenos KJ et.al
26	Male							V173L;V173G					Lenos KJ et.al
27	Male	E1317STOP		G12V				R248Q			R117H		Lenos KJ et.al
28	Female	[STOP] AA 1320 (E16/2000)		G12V					E545K		R117H		Lenos KJ et.al
29	Male	[STOP] AA 1798 (E16/3434)		Q61L	R361C			I195T					Lenos KJ et.al
30	Male	[STOP] AA 1471		G12A	R361H								Lenos KJ et.al
31	Female						V600E	R196STOP;R213STOP					Lenos KJ et.al
32	Male	[STOP] AA 1513 (E16/2579)						E286K					Lenos KJ et.al
33	Female	E -> [STOP] (1379)		Q61H				E204STOP				R505C	Lenos KJ et.al
34	Female		S45F						H1047R				Lenos KJ et.al
35	Male			G12D				E287STOP					Lenos KJ et.al
36	Male	R -> [STOP] (876)		G12C				G245D					Lenos KJ et.al
37	Female			A146T				C242F;K292R					Lenos KJ et.al
38	Female	R -> [STOP] (213)		A146T				R248W					Lenos KJ et.al
39	Female						V600E	G244V					Lenos KJ et.al
40	Male	C -> [STOP] (1289)		G12R	A118V			E -> [STOP] (349)					Lenos KJ et.al
41	Male				C363R		V600E	[STOP] AA 122 (E4/268)					Lenos KJ et.al
42	Female	[STOP] AA 1133 (E16/1439); [STOP] AA 1564 (E16/2732)					V600E	A159V			R117H	R505C	Lenos KJ et.al
43	Male	Q -> [STOP] (1477)		G12D									Lenos KJ et.al
44	Male			G12C				R175H					Lenos KJ et.al
45	Female	[STOP] AA 1312 (E16/1976)		G13D				R175H					Lenos KJ et.al
46	Female	Q -> [STOP] (695)		G12V									Lenos KJ et.al
47	Female	R -> [STOP] (499)		G12A						R14G; [STOP] AA 43 (E2/48)	R114H		Lenos KJ et.al
48	Female	[STOP] AA 1472 (E16/2456)R -> [STOP] (838);									R114H		Lenos KJ et.al
49	Male	[STOP] AA 1304 (E16/1952)		G12D				R248Q					Lenos KJ et.al
50	Male			G13D									Lenos KJ et.al
51	Male	[STOP] AA 819 (E16/497)							E545K				Lenos KJ et.al
52	Female												Lenos KJ et.al
P-0000241	Female	S1465Wfs*3;D1134Efs*3;R2530W		G12C				R158H					Yaeger R et.al
P-0000703	Male				Q248Sfs*88			V173L					Cercek A et.al
P-0000762	Male	R1450*;N741Ifs*20		G12D				X224_splice					Cercek A et.al
P-0000940	Female	R805*;P1497Qfs*10		G13D				R273C		R130Q			Cercek A et.al
P-0001054	Female	A1492Vfs*12		G12D	G352R		P277Hfs*2	C242S	Q546K				Yaeger R et.al
P-0001427	Female			G12D				X332_splice			A73F		Cercek A et.al
P-0001531	Male	S1346*;E1345*						R175H					Cercek A et.al
P-0001732	Female	A1296Qfs*9		G12V					E542K;M1043I				Cercek A et.al
P-0002078	Male							Y163C			V31Gfs*9		Yaeger R et.al
P-0002080	Male	R216*;E1345*	CTNNB1 intragenic	G13D				G266E					Yaeger R et.al
P-0002395	Male												Cercek A et.al
P-0002673	Male			G12V				L114Cfs*9					Cercek A et.al
P-0003035	Female	R232*		T20M				T155Hfs*26					Cercek A et.al
P-0003254	Male	E902*;S1206Rfs*59		G12V					E545K				Yaeger R et.al
P-0004011	Male										I164Sfs*9;G347D		Yaeger R et.al
P-0004549	Female	E1494Vfs*12		G12V				E294Sfs*51					Cercek A et.al
P-0004977	Male	D802*;L1488Yfs*19		G12A				R175H					Cercek A et.al
P-0005103	Male	R1450*;Q789*		G13D				R213*					Cercek A et.al
P-0005307	Female	A1492Cfs*22;S1068Gfs*57		G12D	G419W			S96del	E545K				Cercek A et.al
P-0005487	Male				X483_splice		V600E				A115Tfs*11		Cercek A et.al
P-0005755	Male	R216*		G13D	G231Afs*10								Cercek A et.al
P-0005961	Male						V600E	N131del		D92N			Yaeger R et.al
P-0006345	Female	R1450*;R283*		G12D									Cercek A et.al
P-0006434	Female	L1382Hfs*3						K132E				S282*	Cercek A et.al
P-0006715	Male	R283*		G12V				R273H					Cercek A et.al
P-0006825	Male							T253Nfs*11					Cercek A et.al
P-0006906	Female				R361C		V600E	R337C			A244Pfs*175	S7F	Cercek A et.al
P-0007342	Female							G245S					Cercek A et.al
P-0008079	Male	E847*			Y513H			R273H					Cercek A et.al
P-0008579	Female				R361H		D594G	C229_H233del					Cercek A et.al
P-0008735	Female	S1465Wfs*3;E892*	Q123*	G12C	R361C			R209Kfs*6					Cercek A et.al
P-0009200	Female			Q61H				R282W					Cercek A et.al
P-0009302	Male	E1309Dfs*4;K1359*											Cercek A et.al
P-0009355	Female						V600E	C176F					Cercek A et.al
P-0010781	Male				R361C;R445*								Yaeger R et.al
P-0011014	Male			G12V									Cercek A et.al
P-0011120	Female	S1315*						R273H					Cercek A et.al
P-0011563	Male			G13D				L111Ffs*40				H580R	Cercek A et.al
P-0013062	Male							R158H					Cercek A et.al
P-0013121	Female							R273H					Cercek A et.al
P-0013495	Male	E1353*;E1020*;S2125F		G12D	H111D			S215R	Q546R			R658*	Cercek A et.al
P-0013551	Female						V600E	G244D					Cercek A et.al
P-0013772	Female	F1491Lfs*16;T1023Nfs*6		G12D	L389del			R273C					Cercek A et.al
P-0013784	Female	S1465Wfs*3;R876*						R273P;N210Tfs*37					Cercek A et.al
P-0014190	Male	S1465Wfs*3;E868*		G13D	K428Nfs*11;D424V				E542K				Cercek A et.al
P-0015146	Male	E1408*						C176Y					Cercek A et.al
P-0015443	Male							P151S					Cercek A et.al
P-0018249	Male			G12A				Q104*	R230G				Cercek A et.al
P-0019949	NA	R216*;R499*		G12A									Cercek A et.al
P-0020573	Male							R196*					Cercek A et.al
P-0021976	Male												Cercek A et.al
P-0024823	Male	L954*;Q1447Kfs*29;S963T				Q61K		S99Rfs*23	Q546P				Cercek A et.al
P-0025444	Male							R342*			Q414*;E284*	R224*	Cercek A et.al
P-0025837	Female	E1408*						R248W					Cercek A et.al
P-0025883	NA	S1465Wfs*3;R876*											Cercek A et.al
P-0027648	Female	S770*		G12D				E285K					Cercek A et.al
P-0032718	Female	R216*;N436Ifs*18		G12D		X150_splice						R367*	Cercek A et.al
P-0035536	Male												Cercek A et.al
P-0038195	Male	F1396Rfs*12				G12A		X260_splice					Cercek A et.al
PM1	NA												Heuvelings, D.J.I et.al
PM2	NA						V600E	R213*					Heuvelings, D.J.I et.al
PM3	NA	G1312*		G12D	C401Lfs*3			P128Lfs*42					Heuvelings, D.J.I et.al
PM4	NA	V1405Afs*3						A76Cfs*73					Heuvelings, D.J.I et.al
PM5	NA	Q1260*;E1552*		A59T		L171Tfs*5			R310H				Heuvelings, D.J.I et.al
PM6	NA			G12S					E545K				Heuvelings, D.J.I et.al
PM7	NA				W524C		V600E	R273C					Heuvelings, D.J.I et.al
PM8	NA	S1465Wfs*3		G12V									Heuvelings, D.J.I et.al
PM9	NA						V600E	C135F				A315P	Heuvelings, D.J.I et.al
P-0005823	Male			G13D	S32*					K267Rfs*9	G659Vfs*41;R371*;P229L	T138A	Cercek A et.al
P-0014323	Female			G13D	I228T						G659Vfs*41		Cercek A et.al
P-0032065	Female							R248Q					Cercek A et.al
P-0034929	Male							L194R					Cercek A et.al

## Sheet: Table S3
Table S3: Comparison of mutation frequency of 11 driver genes between CRC-PM and CRC
		CRC-PM (n=124)			CRC (n=694)			P-value (Chi-square)
	Mut	Wt	Frequency (%)		Mut	Wt	Frequency (%)
APC	61	63	49.1935		521	173	75.072	＜0.001
BRAF	16	108	12.9		72	622	10.3746	0.403
CTNNB1	3	121	2.42		62	632	8.93372	0.013
FBXW7	12	112	9.68		109	585	15.7061	0.089
KRAS	66	58	53.23		304	390	43.804	0.052
NRAS	5	119	4.03226		30	664	4.32277	0.883
PIK3CA	16	108	12.9032		155	539	22.3343	0.017
PTEN	5	119	4.03		52	642	7.4928	0.163
SMAD4	24	100	19.3548		106	588	15.2738	0.252
TP53	82	42	66.13		474	220	68.2997	0.633
RNF43	14	110	11.29		56	638	8.06916	0.238

## Sheet: Table S4
Table S4: Somatic copy number alteration (CNA) table for 63 CRC-PM and 694 CRC patients
Gene	Cytoband	CNA	Profiled Samples	#	Frequency(%)	Is Cancer Gene	CNA type
SOX2	3q26.33	AMP	1	694	0.1	Yes	CRC CNA
LATS1	6q25.1	AMP	1	694	0.1	Yes	CRC CNA
NKX3-1	8p21.2	HOMDEL	5	694	0.7	Yes	CRC CNA
TP53	17p13.1	HOMDEL	1	694	0.1	Yes	CRC CNA
CD79B	17q23.3	AMP	1	694	0.1	Yes	CRC CNA
BRCA2	13q13.1	AMP	9	694	1.3	Yes	CRC CNA
RAC1	7p22.1	AMP	1	694	0.1	Yes	CRC CNA
TERT	5p15.33	AMP	4	694	0.6	Yes	CRC CNA
PPP4R2	3p13	AMP	1	319	0.3	Yes	CRC CNA
INHBA	7p14.1	AMP	2	628	0.3	Yes	CRC CNA
UPF1	19p13.11	AMP	1	319	0.3	Yes	CRC CNA
FGFR2	10q26.13	AMP	1	694	0.1	Yes	CRC CNA
PAX5	9p13.2	HOMDEL	1	694	0.1	Yes	CRC CNA
PAK5	20p12.2	AMP	3	694	0.4	Yes	CRC CNA
FGF19	11q13.3	AMP	3	694	0.4	Yes	CRC CNA
ERCC5	13q33.1	AMP	7	694	1	Yes	CRC CNA
MST1R	3p21.31	HOMDEL	1	628	0.2	Yes	CRC CNA
CYSLTR2	13q14.2	AMP	4	319	1.3	Yes	CRC CNA
MAP3K1	5q11.2	HOMDEL	1	694	0.1	Yes	CRC CNA
PRKCI	3q26.2	AMP	2	319	0.6	Yes	CRC CNA
CSF3R	1p34.3	HOMDEL	1	628	0.2	Yes	CRC CNA
RRAS2	11p15.2	AMP	1	319	0.3	Yes	CRC CNA
IKZF1	7p12.2	AMP	1	694	0.1	Yes	CRC CNA
SMAD2	18q21.1	HOMDEL	5	694	0.7	Yes	CRC CNA
NCOA3	20q13.12	AMP	18	628	2.9	Yes	CRC CNA
SRC	20q11.23	AMP	22	694	3.2	Yes	CRC CNA
JAK1	1p31.3	AMP	1	694	0.1	Yes	CRC CNA
NBN	8q21.3	AMP	1	694	0.1	Yes	CRC CNA
FUBP1	1p31.1	HOMDEL	1	694	0.1	Yes	CRC CNA
CCND2	12p13.32	AMP	12	694	1.7	Yes	CRC CNA
ELF3	1q32.1	AMP	2	319	0.6	Yes	CRC CNA
PTPRT	20q12-q13.11	AMP	16	694	2.3	Yes	CRC CNA
NRAS	1p13.2	HOMDEL	1	694	0.1	Yes	CRC CNA
FLT1	13q12.3	AMP	25	694	3.6	Yes	CRC CNA
EPHA7	6q16.1	HOMDEL	1	628	0.2	Yes	CRC CNA
ARID1B	6q25.3	HOMDEL	1	694	0.1	Yes	CRC CNA
RB1	13q14.2	AMP	5	694	0.7	Yes	CRC CNA
KLF4	9q31.2	AMP	1	694	0.1	Yes	CRC CNA
MCL1	1q21.2	AMP	1	694	0.1	Yes	CRC CNA
CRLF2	Xp22.3 and Yp11.3	AMP	1	694	0.1	Yes	CRC CNA
BCL2	18q21.33	HOMDEL	1	694	0.1	Yes	CRC CNA
FGFR1	8p11.23	HOMDEL	1	694	0.1	Yes	CRC CNA
PRKN	6q26	HOMDEL	8	694	1.2	Yes	CRC CNA
CRLF2	Xp22.3 and Yp11.3	HOMDEL	1	694	0.1	Yes	CRC CNA
PRKAR1A	17q24.2	AMP	1	694	0.1	Yes	CRC CNA
FGF3	11q13.3	AMP	3	694	0.4	Yes	CRC CNA
NCOR1	17p12-p11.2	HOMDEL	2	694	0.3	Yes	CRC CNA
CDKN2B	9p21.3	HOMDEL	7	694	1	Yes	CRC CNA
ETV1	7p21.2	AMP	1	694	0.1	Yes	CRC CNA
PMS2	7p22.1	AMP	1	694	0.1	Yes	CRC CNA
PIK3CA	3q26.32	AMP	1	694	0.1	Yes	CRC CNA
CDK4	12q14.1	AMP	1	694	0.1	Yes	CRC CNA
MSH6	2p16.3	HOMDEL	1	694	0.1	Yes	CRC CNA
EGFR	7p11.2	AMP	7	694	1	Yes	CRC CNA
NF1	17q11.2	AMP	1	694	0.1	Yes	CRC CNA
MDM2	12q15	AMP	1	694	0.1	Yes	CRC CNA
RARA	17q21.2	AMP	6	694	0.9	Yes	CRC CNA
STK40	1p34.3	AMP	1	694	0.1	Yes	CRC CNA
MST1	3p21.31	HOMDEL	1	628	0.2	Yes	CRC CNA
MAP2K4	17p12	HOMDEL	7	694	1	Yes	CRC CNA
DIS3	13q21.33	AMP	9	694	1.3	Yes	CRC CNA
PREX2	8q13.2	AMP	1	319	0.3	Yes	CRC CNA
VTCN1	1p13.1-p12	HOMDEL	1	694	0.1	Yes	CRC CNA
RAD21	8q24.11	AMP	3	628	0.5	Yes	CRC CNA
AXIN2	17q24.1	AMP	1	694	0.1	Yes	CRC CNA
CCND1	11q13.3	AMP	3	694	0.4	Yes	CRC CNA
CYLD	16q12.1	AMP	3	319	0.9	Yes	CRC CNA
SMAD3	15q22.33	HOMDEL	6	694	0.9	Yes	CRC CNA
PMAIP1	18q21.32	HOMDEL	2	694	0.3	Yes	CRC CNA
ICOSLG	21q22.3	HOMDEL	1	694	0.1	Yes	CRC CNA
IRF4	6p25.3	HOMDEL	1	694	0.1	Yes	CRC CNA
PIK3CB	3q22.3	AMP	1	694	0.1	Yes	CRC CNA
PIK3R3	1p34.1	AMP	1	694	0.1	Yes	CRC CNA
MET	7q31	AMP	2	694	0.3	Yes	CRC CNA
RAC2	22q13.1	HOMDEL	1	319	0.3	Yes	CRC CNA
SDHA	5p15.33	AMP	3	694	0.4	Yes	CRC CNA
SOX17	8q11.23	AMP	2	694	0.3	Yes	CRC CNA
CCND3	6p21.1	AMP	5	694	0.7	Yes	CRC CNA
RB1	13q14.2	HOMDEL	1	694	0.1	Yes	CRC CNA
TCF7L2	10q25.2-q25.3	HOMDEL	1	628	0.2	Yes	CRC CNA
MLH1	3p22.2	HOMDEL	1	694	0.1	Yes	CRC CNA
CXCR4	2q22.1	HOMDEL	2	628	0.3	Yes	CRC CNA
KDM5A	12p13.33	AMP	8	694	1.2	Yes	CRC CNA
RECQL4	8q24.3	AMP	16	694	2.3	Yes	CRC CNA
ERCC4	16p13.12	AMP	1	694	0.1	Yes	CRC CNA
KEAP1	19p13.2	AMP	1	694	0.1	Yes	CRC CNA
MYC	8q24.21	AMP	21	694	3	Yes	CRC CNA
SHQ1	3p13	AMP	1	694	0.1	Yes	CRC CNA
CD276	15q24.1	AMP	1	694	0.1	Yes	CRC CNA
SOCS1	16p13.13	AMP	1	694	0.1	Yes	CRC CNA
PIK3C2G	12p12.3	AMP	2	694	0.3	Yes	CRC CNA
CDK8	13q12.13	AMP	20	694	2.9	Yes	CRC CNA
MSH2	2p21-p16.3	HOMDEL	1	694	0.1	Yes	CRC CNA
CRKL	22q11.21	AMP	2	694	0.3	Yes	CRC CNA
LATS2	13q12.11	AMP	15	694	2.2	Yes	CRC CNA
PIM1	6p21.2	AMP	1	694	0.1	Yes	CRC CNA
RHOA	3p21.31	HOMDEL	1	694	0.1	Yes	CRC CNA
MUTYH	1p34.1	AMP	1	694	0.1	Yes	CRC CNA
AXL	19q13.2	AMP	1	694	0.1	Yes	CRC CNA
PTEN	10q23.31	HOMDEL	10	694	1.4	Yes	CRC CNA
NSD3	8p11.23	HOMDEL	1	319	0.3	Yes	CRC CNA
CARM1	19p13.2	AMP	1	319	0.3	Yes	CRC CNA
DUSP4	8p12	HOMDEL	4	319	1.3	Yes	CRC CNA
BCL2L1	20q11.21	AMP	41	694	5.9	Yes	CRC CNA
STAT3	17q21.2	AMP	1	628	0.2	Yes	CRC CNA
AURKA	20q13.2	AMP	20	694	2.9	Yes	CRC CNA
AMER1	Xq11.2	HOMDEL	1	694	0.1	Yes	CRC CNA
TNFAIP3	6q23.3	AMP	2	694	0.3	Yes	CRC CNA
AKT1	14q32.33	AMP	2	694	0.3	Yes	CRC CNA
FLCN	17p11.2	HOMDEL	2	694	0.3	Yes	CRC CNA
FOXO1	13q14.11	AMP	5	628	0.8	Yes	CRC CNA
CDKN2A	9p21.3	HOMDEL	7	694	1	Yes	CRC CNA
IL7R	5p13.2	AMP	1	694	0.1	Yes	CRC CNA
XIAP	Xq25	AMP	1	694	0.1	Yes	CRC CNA
CSF3R	1p34.3	AMP	1	628	0.2	Yes	CRC CNA
SMAD4	18q21.2	HOMDEL	13	694	1.9	Yes	CRC CNA
ASXL1	20q11.21	AMP	34	694	4.9	Yes	CRC CNA
PTPRD	9p24.1-p23	HOMDEL	1	694	0.1	Yes	CRC CNA
NSD3	8p11.23	AMP	9	319	2.8	Yes	CRC CNA
CARD11	7p22.2	AMP	2	694	0.3	Yes	CRC CNA
FAT1	4q35.2	HOMDEL	3	694	0.4	Yes	CRC CNA
FGFR1	8p11.23	AMP	17	694	2.4	Yes	CRC CNA
CCNE1	19q12	AMP	5	694	0.7	Yes	CRC CNA
MPL	1p34.2	AMP	1	694	0.1	Yes	CRC CNA
FOXL2	3q22.3	AMP	1	694	0.1	Yes	CRC CNA
NRAS	1p13.2	AMP	1	694	0.1	Yes	CRC CNA
KRAS	12p12.1	AMP	7	694	1	Yes	CRC CNA
SMARCA4	19p13.2	AMP	2	694	0.3	Yes	CRC CNA
SUZ12	17q11.2	AMP	2	694	0.3	Yes	CRC CNA
DNMT3B	20q11.21	AMP	27	694	3.9	Yes	CRC CNA
CDK12	17q12	AMP	12	694	1.7	Yes	CRC CNA
TENT5C	1p12	HOMDEL	1	694	0.1	Yes	CRC CNA
TSHR	14q24-q31	HOMDEL	1	694	0.1	Yes	CRC CNA
AKT2	19q13.2	AMP	9	694	1.3	Yes	CRC CNA
RAD51D	17q12	AMP	1	694	0.1	Yes	CRC CNA
ARID1B	6q25.3	AMP	1	694	0.1	Yes	CRC CNA
PBRM1	3p21.1	HOMDEL	1	694	0.1	Yes	CRC CNA
AGO2	8q24.3	AMP	11	319	3.4	Yes	CRC CNA
IGF2	11p15.5	AMP	2	694	0.3	Yes	CRC CNA
CALR	19p13.13	AMP	2	628	0.3	Yes	CRC CNA
STAT5A	17q21.2	AMP	1	628	0.2	Yes	CRC CNA
RTEL1	20q13.33	AMP	18	319	5.6	Yes	CRC CNA
DNMT1	19p13.2	AMP	1	694	0.1	Yes	CRC CNA
ETV6	12p13.2	AMP	1	694	0.1	Yes	CRC CNA
ESR1	6q25.1-q25.2	AMP	1	694	0.1	Yes	CRC CNA
NF2	22q12.2	AMP	1	694	0.1	Yes	CRC CNA
TOP1	20q12	AMP	21	694	3	Yes	CRC CNA
SMARCB1	22q11.23	AMP	2	694	0.3	Yes	CRC CNA
MAP3K13	3q27.2	AMP	1	694	0.1	Yes	CRC CNA
CDKN1B	12p13.1	AMP	5	694	0.7	Yes	CRC CNA
MYCL	1p34.2	AMP	1	694	0.1	Yes	CRC CNA
PIK3C3	18q12.3	HOMDEL	2	694	0.3	Yes	CRC CNA
TEK	9p21.2	HOMDEL	1	319	0.3	Yes	CRC CNA
FLT3	13q12.2	AMP	34	694	4.9	Yes	CRC CNA
KMT2B	19q13.12	AMP	1	319	0.3	Yes	CRC CNA
RAD52	12p13.33	AMP	11	694	1.6	Yes	CRC CNA
SMARCD1	12q13.12	HOMDEL	1	694	0.1	Yes	CRC CNA
MAPK1	22q11.22	AMP	2	694	0.3	Yes	CRC CNA
IRS2	13q34	AMP	15	694	2.2	Yes	CRC CNA
FGF4	11q13.3	AMP	3	694	0.4	Yes	CRC CNA
GNAS	20q13.32	AMP	19	694	2.7	Yes	CRC CNA
BRCA1	17q21.31	AMP	1	694	0.1	Yes	CRC CNA
RICTOR	5p13.1	AMP	2	694	0.3	Yes	CRC CNA
RRAGC	1p34.3	AMP	1	319	0.3	Yes	CRC CNA
CDKN2C	1p32.3	AMP	1	694	0.1	Yes	CRC CNA
RAD54L	1p34.1	AMP	1	694	0.1	Yes	CRC CNA
NF2	22q12.2	HOMDEL	1	694	0.1	Yes	CRC CNA
MALT1	18q21.32	HOMDEL	2	628	0.3	Yes	CRC CNA
PALB2	16p12.2	AMP	2	694	0.3	Yes	CRC CNA
ERBB2	17q12	AMP	16	694	2.3	Yes	CRC CNA
RYBP	3p13	AMP	1	694	0.1	Yes	CRC CNA
STAT5B	17q21.2	AMP	1	628	0.2	Yes	CRC CNA
SMAD2	18q21.1	AMP	2	694	0.3	Yes	CRC CNA
KDM5A	12p13.33	HOMDEL	1	694	0.1	Yes	CRC CNA
CSF1R	5q32	AMP	2	694	0.3	Yes	CRC CNA
IFNGR1	6q23.3	AMP	1	694	0.1	Yes	CRC CNA
VEGFA	6p21.1	AMP	4	628	0.6	Yes	CRC CNA
BMPR1A	10q23.2	HOMDEL	3	694	0.4	Yes	CRC CNA
PPM1D	17q23.3	AMP	1	628	0.2	Yes	CRC CNA
PDGFRB	5q32	AMP	2	694	0.3	Yes	CRC CNA
TET2	4q24	HOMDEL	2	694	0.3	Yes	CRC CNA
MAPK3	16p11.2	AMP	6	628	1	Yes	CRC CNA
RUNX1	21q22.12	HOMDEL	1	694	0.1	Yes	CRC CNA
BAP1	3p21.1	HOMDEL	1	694	0.1	Yes	CRC CNA
NF1	17q11.2	HOMDEL	1	694	0.1	Yes	CRC CNA
PIK3R2	19p13.11	AMP	1	694	0.1	Yes	CRC CNA
APC	5q22.2	HOMDEL	1	694	0.1	Yes	CRC CNA
CTNNB1	3p22.1	HOMDEL	2	694	0.3	Yes	CRC CNA
NTRK3	15q25.3	AMP	1	694	0.1	Yes	CRC CNA
PTEN	10q23.31	HOMDEL	2	55	3.6	Yes	CRC-PM CAN
NKX3-1	8p21.2	HOMDEL	2	55	3.6	Yes	CRC-PM CAN
BCL10	1p22.3	HOMDEL	1	48	2.1	Yes	CRC-PM CAN
DNAJB1	19p13.12	HOMDEL	1	48	2.1	Yes	CRC-PM CAN
DUSP4	8p12	HOMDEL	1	19	5.3	Yes	CRC-PM CAN
BCL2L1	20q11.21	AMP	3	55	5.5	Yes	CRC-PM CAN
BRCA2	13q13.1	AMP	1	55	1.8	Yes	CRC-PM CAN
AURKA	20q13.2	AMP	1	55	1.8	Yes	CRC-PM CAN
FGFR2	10q26.13	AMP	1	55	1.8	Yes	CRC-PM CAN
FGF19	11q13.3	AMP	1	55	1.8	Yes	CRC-PM CAN
NEGR1	1p31.1	HOMDEL	1	48	2.1	Yes	CRC-PM CAN
IL7R	5p13.2	AMP	1	55	1.8	Yes	CRC-PM CAN
PRKCI	3q26.2	AMP	2	19	10.5	Yes	CRC-PM CAN
SOX9	17q24.3	HOMDEL	1	55	1.8	Yes	CRC-PM CAN
SMAD4	18q21.2	HOMDEL	5	63	7.9	Yes	CRC-PM CAN
CSF3R	1p34.3	AMP	1	48	2.1	Yes	CRC-PM CAN
ASXL1	20q11.21	AMP	1	55	1.8	Yes	CRC-PM CAN
SMAD2	18q21.1	HOMDEL	1	55	1.8	Yes	CRC-PM CAN
SF3B1	2q33.1	AMP	1	55	1.8	Yes	CRC-PM CAN
SUZ12	17q11.2	HOMDEL	1	55	1.8	Yes	CRC-PM CAN
SRC	20q11.23	AMP	1	55	1.8	Yes	CRC-PM CAN
TENT5C	1p12	AMP	1	55	1.8	Yes	CRC-PM CAN
CTLA4	2q33.2	AMP	1	55	1.8	Yes	CRC-PM CAN
FGFR1	8p11.23	AMP	1	55	1.8	Yes	CRC-PM CAN
FUBP1	1p31.1	HOMDEL	1	55	1.8	Yes	CRC-PM CAN
KRAS	12p12.1	AMP	1	55	1.8	Yes	CRC-PM CAN
SMARCA4	19p13.2	AMP	1	55	1.8	Yes	CRC-PM CAN
CCND2	12p13.32	AMP	1	55	1.8	Yes	CRC-PM CAN
DNMT3B	20q11.21	AMP	1	55	1.8	Yes	CRC-PM CAN
NOTCH2	1p12	AMP	1	55	1.8	Yes	CRC-PM CAN
JUN	1p32.1	HOMDEL	1	55	1.8	Yes	CRC-PM CAN
FLT1	13q12.3	AMP	4	55	7.3	Yes	CRC-PM CAN
BCL2	18q21.33	HOMDEL	1	55	1.8	Yes	CRC-PM CAN
FGFR1	8p11.23	HOMDEL	1	55	1.8	Yes	CRC-PM CAN
PRKN	6q26	HOMDEL	1	55	1.8	Yes	CRC-PM CAN
FGF3	11q13.3	AMP	1	55	1.8	Yes	CRC-PM CAN
AXIN2	17q24.1	HOMDEL	1	55	1.8	Yes	CRC-PM CAN
MSH3	5q14.1	HOMDEL	1	19	5.3	Yes	CRC-PM CAN
AGO2	8q24.3	AMP	1	19	5.3	Yes	CRC-PM CAN
PIK3CA	3q26.32	AMP	1	55	1.8	Yes	CRC-PM CAN
RTEL1	20q13.33	AMP	2	19	10.5	Yes	CRC-PM CAN
MSH6	2p16.3	HOMDEL	1	55	1.8	Yes	CRC-PM CAN
CTNNB1	3p22.1	AMP	1	55	1.8	Yes	CRC-PM CAN
EPCAM	2p21	HOMDEL	1	55	1.8	Yes	CRC-PM CAN
NPM1	5q35.1	HOMDEL	1	55	1.8	Yes	CRC-PM CAN
CDKN1B	12p13.1	AMP	1	55	1.8	Yes	CRC-PM CAN
MYCL	1p34.2	AMP	1	55	1.8	Yes	CRC-PM CAN
MDM2	12q15	AMP	2	55	3.6	Yes	CRC-PM CAN
PIK3C3	18q12.3	HOMDEL	2	55	3.6	Yes	CRC-PM CAN
FLT3	13q12.2	AMP	5	55	9.1	Yes	CRC-PM CAN
STK40	1p34.3	AMP	1	55	1.8	Yes	CRC-PM CAN
RAD52	12p13.33	AMP	3	55	5.5	Yes	CRC-PM CAN
FGF4	11q13.3	AMP	1	55	1.8	Yes	CRC-PM CAN
GNAS	20q13.32	AMP	2	55	3.6	Yes	CRC-PM CAN
ARID2	12q12	HOMDEL	1	55	1.8	Yes	CRC-PM CAN
RAD21	8q24.11	AMP	1	48	2.1	Yes	CRC-PM CAN
RICTOR	5p13.1	AMP	1	55	1.8	Yes	CRC-PM CAN
CCND1	11q13.3	AMP	1	55	1.8	Yes	CRC-PM CAN
PMAIP1	18q21.32	HOMDEL	1	55	1.8	Yes	CRC-PM CAN
MALT1	18q21.32	HOMDEL	2	48	4.2	Yes	CRC-PM CAN
SUFU	10q24.32	HOMDEL	1	55	1.8	Yes	CRC-PM CAN
RASA1	5q14.3	HOMDEL	2	55	3.6	Yes	CRC-PM CAN
SDHA	5p15.33	AMP	1	55	1.8	Yes	CRC-PM CAN
SOX17	8q11.23	AMP	1	55	1.8	Yes	CRC-PM CAN
CCND3	6p21.1	AMP	1	55	1.8	Yes	CRC-PM CAN
VEGFA	6p21.1	AMP	1	48	2.1	Yes	CRC-PM CAN
VTCN1	1p13.1-p12	AMP	1	55	1.8	Yes	CRC-PM CAN
KDM5A	12p13.33	AMP	3	55	5.5	Yes	CRC-PM CAN
RECQL4	8q24.3	AMP	3	55	5.5	Yes	CRC-PM CAN
RNF43	17q22	HOMDEL	1	55	1.8	Yes	CRC-PM CAN
MYC	8q24.21	AMP	5	55	9.1	Yes	CRC-PM CAN
RAD50	5q31.1	HOMDEL	1	55	1.8	Yes	CRC-PM CAN
CDK8	13q12.13	AMP	2	55	3.6	Yes	CRC-PM CAN
MSH2	2p21-p16.3	HOMDEL	1	55	1.8	Yes	CRC-PM CAN
MYCN	2p24.3	AMP	1	55	1.8	Yes	CRC-PM CAN
NF1	17q11.2	HOMDEL	1	55	1.8	Yes	CRC-PM CAN
LATS2	13q12.11	AMP	1	55	1.8	Yes	CRC-PM CAN

## Sheet: Table S5
Table S5: Clinical characteristics of 63 CRC-PM patients
Study ID	Patient ID	Sample ID	Impact TMB Score	TMB (nonsynonymous)	Age at Diagnosis	Age Groups	Age Subgroups	Cancer Type	Cancer Type Detailed	Diabetes Mellitus History	First Symptoms at Diagnosis	Fraction Genome Altered	Gene Panel	Hypertension History	Metastasectomy	Metastatic Site	Molecular Subtype	MSI Score	MSI Type	Mutation Count	Oncotree Code	Overall Survival (Months) from Dx of Met	Overall Survival Status	Primary Tumor Location	PUMP	Race Category	Sample Class	Number of Samples Per Patient	Sample coverage	Sample Type	Sex	Smoker Status	Smoking history	Somatic Status	Stage at Diagnosis	First Line Treatment at Metastasis	Tumor Grade	Tumor Purity	Used for Response	Used in Clinical Analysis	Used in Genomic MSS Analysis	Used in Genomic MSS Met Survival Analysis	Age at Diagnosis_2	Chemo Exposure of sequenced specimen	First Site of Metastasis	mCRC Type	Metastasectomy Site	Metastases Site First: Bone	Metastases Site First: Brain
crc_msk_2017	P-0000241	P-0000241-T01-IM3	NA	8.87324	NA	NA	NA	Colorectal Cancer	Colorectal Adenocarcinoma	NA	NA	0.198	IMPACT341	NA	0	NA	MSI Status	0.27	NA	8	COADREAD	NA	NA	Right	NA	NA	NA	1	NA	Metastasis	Female	NA	NA	Matched	NA	NA	NA	NA	NA	NA	NA	NA	49	Yes	Liver	mCRC Metastasis	NA	0	0
crc_eo_2020	P-0000703	P-0000703-T01-IM3	6.7	NA	80	AO	AO	Colorectal Cancer	Colon Adenocarcinoma	1	incidentally found during CT	0.0003	IMPACT341	1	0	Omentum	MSS	0.15	Stable	6	COAD	29.8159	1:DECEASED	Right	0	WHITE	Tumor	1	531	Metastasis	Male	Never	Never	Unmatched	IV	NA	poorly-diff	50	0	1	1	1	NA	NA	NA	NA	NA	NA	NA
crc_eo_2020	P-0000762	P-0000762-T01-IM3	4.5	NA	63	AO	AO	Colorectal Cancer	Colon Adenocarcinoma	0	Change in bowel habits; BRBPR	0.2687	IMPACT341	1	1	Peritoneum	MSS	0.79	Stable	4	COAD	67.3899	1:DECEASED	Right	1	WHITE	Tumor	1	412	Metastasis	Male	Ever	Never	Matched	IV	adjuvant FOLFOX	mod-diff	50	0	1	1	1	NA	NA	NA	NA	NA	NA	NA
crc_eo_2020	P-0000940	P-0000940-T01-IM3	10	NA	62	AO	AO	Colorectal Cancer	Colon Adenocarcinoma	0	incidentally found during CT	0.2141	IMPACT341	0	1	Peritoneum	MSS	0.18	Stable	9	COAD	77.5148	1:DECEASED	Right	1	WHITE	Tumor	1	500	Metastasis	Female	Never	Former	Matched	IV	NA	mod-diff	15	1	1	1	1	NA	NA	NA	NA	NA	NA	NA
crc_msk_2017	P-0001054	P-0001054-T01-IM3	NA	12.2007	NA	NA	NA	Colorectal Cancer	Colorectal Adenocarcinoma	NA	NA	0.4013	IMPACT341	NA	1	NA	MSI Status	2.68	NA	11	COADREAD	NA	NA	Right	NA	NA	NA	2	NA	Metastasis	Female	NA	NA	Matched	NA	NA	NA	NA	NA	NA	NA	NA	34	Yes	Liver, Peritoneum	mCRC Metastasis	Liver	0	0
crc_eo_2020	P-0001427	P-0001427-T01-IM3	4.5	NA	65	AO	AO	Colorectal Cancer	Colon Adenocarcinoma	0	Change in bowel habits; BRBPR	0.0954	IMPACT341	0	0	Peritoneum	MSS	0.17	Stable	4	COAD	16.831	1:DECEASED	Right	0	WHITE	Tumor	1	262	Metastasis	Female	Never	Former	Matched	IV	FOLFOX	mod-diff	30	0	1	1	1	NA	NA	NA	NA	NA	NA	NA
crc_eo_2020	P-0001531	P-0001531-T02-IM6	4.4	NA	40	EO	Over_35	Colorectal Cancer	Colon Adenocarcinoma	0	CHANGE IN BOWEL HABITS	0.4174	IMPACT468	0	1	Peritoneum	MSS	1.77	Stable	5	COAD	47.7318	1:DECEASED	Left	1	WHITE	Tumor	1	503	Metastasis	Male	Ever	Former	Matched	IV	CAPOX	mod-diff	60	1	1	1	1	NA	NA	NA	NA	NA	NA	NA
crc_eo_2020	P-0001732	P-0001732-T01-IM3	6.7	NA	63	AO	AO	Colorectal Cancer	Colon Adenocarcinoma	0	incidentally found on colonoscopy	0.3093	IMPACT341	1	0	Peritoneum	MSS	1.51	Stable	6	COAD	27.6792	1:DECEASED	Left	0	WHITE	Tumor	1	323	Metastasis	Female	Ever	Current	Matched	IV	adjuvant HAI FUDR +FOLFIRI	mod-diff	30	0	1	1	1	NA	NA	NA	NA	NA	NA	NA
crc_msk_2017	P-0002078	P-0002078-T01-IM3	NA	2.21831	NA	NA	NA	Colorectal Cancer	Colorectal Adenocarcinoma	NA	NA	0.0113	IMPACT341	NA	0	NA	MSI Status	0	NA	2	COADREAD	NA	NA	Left	NA	NA	NA	1	NA	Metastasis	Male	NA	NA	Matched	NA	NA	NA	NA	NA	NA	NA	NA	20	Yes	Peritoneum	mCRC Metastasis	(Suboptimal Debulking)	0	0
crc_msk_2017	P-0002080	P-0002080-T01-IM3	NA	6.65493	NA	NA	NA	Colorectal Cancer	Colorectal Adenocarcinoma	NA	NA	0.5284	IMPACT341	NA	1	NA	MSI Status	0.86	NA	6	COADREAD	NA	NA	Right	NA	NA	NA	1	NA	Metastasis	Male	NA	NA	Matched	NA	NA	NA	NA	NA	NA	NA	NA	59	Yes	Liver, Peritoneum	mCRC Metastasis	Peritoneum	0	0
crc_eo_2020	P-0002395	P-0002395-T01-IM3	2.2	NA	67	AO	AO	Colorectal Cancer	Colon Adenocarcinoma	0	ABNORMAL IMAGING	0.1423	IMPACT341	0	0	Peritoneum	MSS	0	Stable	2	COAD	16.3379	1:DECEASED	Left	0	WHITE	Tumor	1	326	Metastasis	Male	Ever	Former	Matched	IV	Cape	Unk	20	0	1	1	1	NA	NA	NA	NA	NA	NA	NA
crc_eo_2020	P-0002673	P-0002673-T01-IM3	3.3	NA	53	AO	AO	Colorectal Cancer	Mucinous Adenocarcinoma of the Colon and Rectum	0	Anemia	0.1944	IMPACT341	0	1	Peritoneum	MSS	0.09	Stable	3	MACR	64.3984	1:DECEASED	Left	0	WHITE	Tumor	1	504	Metastasis	Male	Never	Never	Matched	IV	Cape	mod-diff	30	0	1	1	1	NA	NA	NA	NA	NA	NA	NA
crc_eo_2020	P-0003035	P-0003035-T01-IM5	9.8	NA	93	AO	AO	Colorectal Cancer	Colon Adenocarcinoma	0	Anemia	0.408	IMPACT410	1	0	Peritoneum	MSS	0.77	Stable	10	COAD	25.7068	1:DECEASED	Left	0	WHITE	Tumor	1	820	Metastasis	Female	Never	Never	Matched	IV	FOLFOX	Unk	40	0	1	1	1	NA	NA	NA	NA	NA	NA	NA
crc_msk_2017	P-0003254	P-0003254-T01-IM5	NA	10.7659	NA	NA	NA	Colorectal Cancer	Colorectal Adenocarcinoma	NA	NA	0.2618	IMPACT410	NA	1	NA	MSI Status	0.41	NA	11	COADREAD	NA	NA	Left	NA	NA	NA	1	NA	Metastasis	Male	NA	NA	Matched	NA	NA	NA	NA	NA	NA	NA	NA	30	Yes	Pelvis	mCRC Metastasis	Pelvis	0	0
crc_msk_2017	P-0004011	P-0004011-T01-IM5	NA	63.6168	NA	NA	NA	Colorectal Cancer	Colorectal Adenocarcinoma	NA	NA	0.0048	IMPACT410	NA	0	NA	MSI	3.16	NA	66	COADREAD	NA	NA	Right	NA	NA	NA	1	NA	Metastasis	Male	NA	NA	Matched	NA	NA	NA	NA	NA	NA	NA	NA	55	Yes	Peritoneum	mCRC Metastasis	NA	0	0
crc_eo_2020	P-0004549	P-0004549-T01-IM5	3.9	NA	51	AO	AO	Colorectal Cancer	Colon Adenocarcinoma	0	Screening colonoscopy	0.2577	IMPACT410	0	0	Peritoneal Fluid	MSS	0.74	Stable	4	COAD	7.65943	1:DECEASED	Left	0	WHITE	Tumor	1	633	Metastasis	Female	Ever	Former	Matched	IV	5FU/LV	poorly-diff	30	0	1	1	1	NA	NA	NA	NA	NA	NA	NA
crc_eo_2020	P-0004977	P-0004977-T01-IM5	8.9	NA	72	AO	AO	Colorectal Cancer	Colon Adenocarcinoma	0	BRBPR; rectal pain	0.1465	IMPACT410	0	1	Peritoneum	MSS	0.42	Stable	9	COAD	65.1874	1:DECEASED	Left	0	WHITE	Tumor	1	599	Metastasis	Male	Never	Former	Matched	IV	FOLFOX	mod-diff	40	0	1	1	1	NA	NA	NA	NA	NA	NA	NA
crc_eo_2020	P-0005103	P-0005103-T01-IM5	5.9	NA	69	AO	AO	Colorectal Cancer	Colon Adenocarcinoma	0	rectal bleeding, rectal discomfort, tenesmus, diarrhea	0.3219	IMPACT410	1	0	Peritoneum	MSS	0.75	Stable	6	COAD	12.1631	1:DECEASED	Right	0	WHITE	Tumor	1	549	Metastasis	Male	Never	Former	Matched	IV	FOLFOX	mod-diff	60	0	1	1	1	NA	NA	NA	NA	NA	NA	NA
crc_eo_2020	P-0005307	P-0005307-T01-IM5	8.9	NA	53	AO	AO	Colorectal Cancer	Colon Adenocarcinoma	0	abdominal pain	0.0292	IMPACT410	1	0	Peritoneum	MSS	0.22	Stable	9	COAD	44.3787	0:LIVING	Right	0	WHITE	Tumor	1	1158	Metastasis	Female	Never	Never	Matched	IV	FOLFIRI+bev	mod-diff	20	0	1	1	1	NA	NA	NA	NA	NA	NA	NA
crc_eo_2020	P-0005487	P-0005487-T01-IM5	4.9	NA	54	AO	AO	Colorectal Cancer	Colon Adenocarcinoma	0	BRBPR; SCRENNING COLONOSCOPY	0.3253	IMPACT410	0	1	Paracolic Gutter	MSS	2.52	Stable	5	COAD	15.0888	1:DECEASED	Left	0	WHITE	Tumor	1	833	Metastasis	Male	Never	Never	Matched	III	FOLFOX	mod-poorly-diff	20	1	1	1	1	NA	NA	NA	NA	NA	NA	NA
crc_eo_2020	P-0005755	P-0005755-T01-IM5	5.9	NA	61	AO	AO	Colorectal Cancer	Colon Adenocarcinoma	0	BRBPR	0.0771	IMPACT410	1	0	Peritoneum	MSS	0.35	Stable	6	COAD	21.4333	0:LIVING	Left	0	WHITE	Tumor	1	281	Metastasis	Male	Never	Never	Matched	III	FOLFOX	mod-diff	20	0	1	1	1	NA	NA	NA	NA	NA	NA	NA
crc_eo_2020	P-0005823	P-0005823-T01-IM5	89.5	NA	65	AO	AO	Colorectal Cancer	Colon Adenocarcinoma	1	LLQ pain, constipation, fever	0.1776	IMPACT410	1	NA	Mesentery	MSI	42.22	Instable	91	COAD	NA	NA	Right	NA	ASIAN-FAR EAST/INDIAN SUBCONT	Tumor	1	751	Metastasis	Male	Never	Former	Matched	IV	XELOX + Bev	poorly-diff	70	0	1	0	0	NA	NA	NA	NA	NA	NA	NA
crc_msk_2017	P-0005961	P-0005961-T01-IM5	NA	3.91488	NA	NA	NA	Colorectal Cancer	Colorectal Adenocarcinoma	NA	NA	0.0072	IMPACT410	NA	0	NA	MSI Status	0	NA	4	COADREAD	NA	NA	Left	NA	NA	NA	1	NA	Metastasis	Male	NA	NA	Matched	NA	NA	NA	NA	NA	NA	NA	NA	45	No	Liver, Peritoneum	mCRC Metastasis	NA	0	0
crc_eo_2020	P-0006345	P-0006345-T01-IM5	11.8	NA	72	AO	AO	Colorectal Cancer	Colon Adenocarcinoma	1	change in bowel habits	0.0678	IMPACT410	1	1	Abdominal Wall	MSS	1.83	Stable	12	COAD	33.6949	0:LIVING	Right	0	WHITE	Tumor	1	618	Metastasis	Female	Ever	Former	Matched	IV	NA	mod-diff	20	0	1	1	1	NA	NA	NA	NA	NA	NA	NA
crc_eo_2020	P-0006434	P-0006434-T01-IM5	9.8	NA	67	AO	AO	Colorectal Cancer	Colon Adenocarcinoma	0	shortness of breath upon exertion, anemia	0.2394	IMPACT410	0	0	Peritoneum	MSS	1.25	Stable	10	COAD	42.998	0:LIVING	Left	0	WHITE	Tumor	1	469	Metastasis	Female	Ever	Never	Matched	IV	NA	mod-diff	50	0	1	1	1	NA	NA	NA	NA	NA	NA	NA
crc_eo_2020	P-0006715	P-0006715-T01-IM5	5.9	NA	43	EO	Over_35	Colorectal Cancer	Colon Adenocarcinoma	0	BRBPR; CHANGE IN BOWEL HABITS	0.3935	IMPACT410	0	1	Peritoneum	MSS	1.42	Stable	6	COAD	42.1433	1:DECEASED	Left	1	WHITE	Tumor	1	854	Metastasis	Male	Ever	Former	Matched	IV	FOLFOX + Bev	mod-diff	30	0	1	1	1	NA	NA	NA	NA	NA	NA	NA
crc_eo_2020	P-0006825	P-0006825-T01-IM5	3	NA	78	AO	AO	Colorectal Cancer	Colon Adenocarcinoma	0	Abdominal pain	0.0319	IMPACT410	0	0	Peritoneum	MSS	0.15	Stable	3	COAD	27.712	1:DECEASED	Right	0	WHITE	Tumor	1	987	Metastasis	Male	Never	Former	Matched	III	FOLFIRI+cetux	mod-diff	10	1	1	1	1	NA	NA	NA	NA	NA	NA	NA
crc_eo_2020	P-0006906	P-0006906-T01-IM5	9.8	NA	75	AO	AO	Colorectal Cancer	Colon Adenocarcinoma	0	CHANGE IN BOWEL HABITS; weight loss	0.39	IMPACT410	0	1	Abdominal Wall	MSS	0.94	Stable	10	COAD	92.7022	0:LIVING	Right	1	WHITE	Tumor	1	877	Metastasis	Female	Never	Current	Matched	IV	adjuvant HAI FUDR	mod-diff	40	1	1	1	1	NA	NA	NA	NA	NA	NA	NA
crc_eo_2020	P-0007342	P-0007342-T01-IM5	5.9	NA	33	EO	Under_35	Colorectal Cancer	Colon Adenocarcinoma	0	BRBPR	0.0352	IMPACT410	0	0	Omentum	MSS	0.09	Stable	6	COAD	15.9435	1:DECEASED	Left	0	ASIAN-FAR EAST/INDIAN SUBCONT	Tumor	1	711	Metastasis	Female	Never	Never	Matched	IV	FOLFOX	poorly-diff	50	1	1	1	1	NA	NA	NA	NA	NA	NA	NA
crc_eo_2020	P-0008079	P-0008079-T01-IM5	6.9	NA	59	AO	AO	Colorectal Cancer	Colon Adenocarcinoma	1	brbpr	0.1857	IMPACT410	1	1	Omentum	MSS	1.03	Stable	7	COAD	109.402	0:LIVING	Left	1	WHITE	Tumor	1	707	Metastasis	Male	Ever	Never	Matched	III	FOLFOX	Unk	40	1	1	1	1	NA	NA	NA	NA	NA	NA	NA
crc_eo_2020	P-0008579	P-0008579-T01-IM5	5.9	NA	74	AO	AO	Colorectal Cancer	Rectal Adenocarcinoma	1	increased fatigue, anemia	0.2157	IMPACT410	1	0	Omentum	MSS	0.08	Stable	6	READ	8.54701	1:DECEASED	Rectum	0	WHITE	Tumor	1	755	Metastasis	Female	Ever	Former	Matched	IV	NA	mod-diff	20	1	1	1	1	NA	NA	NA	NA	NA	NA	NA
crc_eo_2020	P-0008735	P-0008735-T01-IM5	9.8	NA	61	AO	AO	Colorectal Cancer	Colon Adenocarcinoma	0	abdominal pain, fatigue, anorexia, weight loss, night sweats, narrowing size of stool	0.6677	IMPACT410	0	1	Peritonuem	MSS	3.02	Indeterminate	10	COAD	93.3268	1:DECEASED	Right	0	WHITE	Tumor	1	1163	Metastasis	Female	Never	Never	Matched	IV	FOLFOX	mod-diff	30	1	1	1	1	NA	NA	NA	NA	NA	NA	NA
crc_eo_2020	P-0009200	P-0009200-T01-IM5	3.9	NA	64	AO	AO	Colorectal Cancer	Colon Adenocarcinoma	0	incidentally found on colonoscopy	0.1989	IMPACT410	0	0	Peritoneum	MSS	0.43	Stable	4	COAD	1.90664	1:DECEASED	Right	0	WHITE	Tumor	1	830	Metastasis	Female	Ever	Current	Matched	IV	FOLFOX	mod-diff	40	1	1	1	1	NA	NA	NA	NA	NA	NA	NA
crc_eo_2020	P-0009302	P-0009302-T01-IM5	3	NA	44	EO	Over_35	Colorectal Cancer	Colon Adenocarcinoma	1	CHANGE IN BOWEL HABITS; BRBPR	0.2108	IMPACT410	0	1	Peritoneal Implant	MSS	0.26	Stable	3	COAD	28.4352	1:DECEASED	Left	1	WHITE	Tumor	1	286	Metastasis	Male	Ever	Never	Matched	IV	FOLFOX	poorly-diff	50	1	1	1	1	NA	NA	NA	NA	NA	NA	NA
crc_eo_2020	P-0009355	P-0009355-T01-IM5	3	NA	60	AO	AO	Colorectal Cancer	Colon Adenocarcinoma	0	ABNORMAL IMAGING	0.0137	IMPACT410	1	0	Omentum	MSS	0	Stable	3	COAD	13.3794	1:DECEASED	Left	0	ASIAN-FAR EAST/INDIAN SUBCONT	Tumor	1	858	Metastasis	Female	Ever	Former	Matched	IV	HAIR FUDR+ FOLFOX	mod-diff	10	0	1	1	1	NA	NA	NA	NA	NA	NA	NA
crc_msk_2017	P-0010781	P-0010781-T01-IM5	NA	4.8936	NA	NA	NA	Colorectal Cancer	Colorectal Adenocarcinoma	NA	NA	0.0001	IMPACT410	NA	0	NA	MSI Status	0	NA	5	COADREAD	NA	NA	Right	NA	NA	NA	1	NA	Metastasis	Male	NA	NA	Matched	NA	NA	NA	NA	NA	NA	NA	NA	35	No	Peritoneum	mCRC Metastasis	NA	0	0
crc_eo_2020	P-0011014	P-0011014-T01-IM5	2	NA	65	AO	AO	Colorectal Cancer	Colorectal Adenocarcinoma	0	BRBPR; abdominal pain	0.0219	IMPACT410	1	1	Peritoneum	MSS	0.31	Stable	2	COADREAD	8.08679	1:DECEASED	Left	0	WHITE	Tumor	1	1169	Metastasis	Male	Ever	Never	Matched	IV	HAI FUDR, oxali, irino	poorly-diff	40	0	1	1	1	NA	NA	NA	NA	NA	NA	NA
crc_eo_2020	P-0011120	P-0011120-T01-IM5	6.9	NA	64	AO	AO	Colorectal Cancer	Colon Adenocarcinoma	0	abdominal pain, nausea	0.238	IMPACT410	1	1	Omentum	MSS	0.64	Stable	7	COAD	41.1571	0:LIVING	Left	0	WHITE	Tumor	1	822	Metastasis	Female	Ever	NA	Matched	III	NA	mod-poorly-diff	75	1	1	1	1	NA	NA	NA	NA	NA	NA	NA
crc_eo_2020	P-0011563	P-0011563-T01-IM5	5.9	NA	39	EO	Over_35	Colorectal Cancer	Rectal Adenocarcinoma	0	ABDOMINAL PAIN, BLOATING/ABDOMINAL GIRTH/PELVIC PRESSURE,PAIN; UPPER GI SX; CHANGE IN BOWEL HABITS	0.211	IMPACT410	0	0	Omentum	MSS	0.15	Stable	6	READ	23.1427	1:DECEASED	Rectum	0	ASIAN-FAR EAST/INDIAN SUBCONT	Tumor	1	927	Metastasis	Male	Never	Never	Matched	IV	FOLFOX	mod-diff	30	1	1	1	1	NA	NA	NA	NA	NA	NA	NA
crc_eo_2020	P-0013062	P-0013062-T01-IM5	1	NA	45	EO	Over_35	Colorectal Cancer	Colon Adenocarcinoma	0	ABDOMINAL PAIN, BLOATING/ABDOMINAL GIRTH/PELVIC PRESSURE,PAIN	0.0205	IMPACT410	0	0	Peritoneum	MSS	0.15	Stable	1	COAD	13.4451	1:DECEASED	Left	0	WHITE	Tumor	1	850	Metastasis	Male	Never	Never	Matched	IV	FOLFOX	poorly-diff	10	1	1	1	1	NA	NA	NA	NA	NA	NA	NA
crc_eo_2020	P-0013121	P-0013121-T02-IM5	8.9	NA	52	AO	AO	Colorectal Cancer	Colon Adenocarcinoma	0	blood in stool	0.2267	IMPACT410	0	0	Abdominal Wall	MSS	1.39	Stable	9	COAD	49.7699	1:DECEASED	Right	0	WHITE	Tumor	1	1334	Metastasis	Female	Never	Never	Matched	II	NA	mod-diff	70	0	1	1	1	NA	NA	NA	NA	NA	NA	NA
crc_eo_2020	P-0013495	P-0013495-T01-IM5	9.8	NA	60	AO	AO	Colorectal Cancer	Colon Adenocarcinoma	0	abdominal pain, brbpr	0.0035	IMPACT410	1	0	Omentum	MSS	0.43	Stable	10	COAD	16.5023	1:DECEASED	Left	0	WHITE	Tumor	1	504	Metastasis	Male	Ever	Former	Matched	IV	NA	poorly-diff	10	0	1	1	1	NA	NA	NA	NA	NA	NA	NA
crc_eo_2020	P-0013551	P-0013551-T01-IM5	3.9	NA	66	AO	AO	Colorectal Cancer	Colon Adenocarcinoma	0	incidentally found on scan	0.2777	IMPACT410	1	0	Omentum	MSS	1.63	Stable	4	COAD	4.10914	1:DECEASED	Left	0	WHITE	Tumor	1	495	Metastasis	Female	Never	Current	Matched	IV	adjuvant FOLFOX	mod-poorly-diff	30	0	1	1	1	NA	NA	NA	NA	NA	NA	NA
crc_eo_2020	P-0013772	P-0013772-T01-IM5	10.8	NA	44	EO	Over_35	Colorectal Cancer	Colon Adenocarcinoma	0	SCREENING COLONOSCOPY	0.0828	IMPACT410	0	NA	Peritoneum	MSS	0.49	Stable	11	COAD	NA	NA	Left	NA	WHITE	Tumor	1	900	Metastasis	Female	Never	Current	Matched	IV	NA	mod-diff	20	0	1	1	0	NA	NA	NA	NA	NA	NA	NA
crc_eo_2020	P-0013784	P-0013784-T01-IM5	11.8	NA	84	AO	AO	Colorectal Cancer	Colon Adenocarcinoma	0	Change in bowel habits; BRBPR	0.1003	IMPACT410	0	0	Omentum	MSS	0.07	Stable	12	COAD	15.1874	1:DECEASED	Right	0	WHITE	Tumor	1	686	Metastasis	Female	Ever	Former	Matched	II	NA	mod-diff	10	0	1	1	1	NA	NA	NA	NA	NA	NA	NA
crc_eo_2020	P-0014190	P-0014190-T01-IM6	9.7	NA	53	AO	AO	Colorectal Cancer	Mucinous Adenocarcinoma of the Colon and Rectum	0	Change in bowel habits	0	IMPACT468	0	1	Peritoneum	MSS	0.13	Stable	11	MACR	35.1085	0:LIVING	Right	0	WHITE	Tumor	1	554	Metastasis	Male	Never	Never	Matched	II	Adjuvant HAI FUDR, NED	mod-diff	10	0	1	1	1	NA	NA	NA	NA	NA	NA	NA
crc_eo_2020	P-0014323	P-0014323-T01-IM6	14	NA	45	EO	Over_35	Colorectal Cancer	Colon Adenocarcinoma	0	CHANGE IN BOWEL HABITS	0.0108	IMPACT468	0	NA	Mesentery	MSI	13.06	Instable	16	COAD	NA	NA	Right	NA	ASIAN-FAR EAST/INDIAN SUBCONT	Tumor	1	762	Metastasis	Female	Never	Former	Matched	IV	irinotecan + bev	poorly-diff	30	0	1	0	0	NA	NA	NA	NA	NA	NA	NA
crc_eo_2020	P-0015146	P-0015146-T02-IM6	6.1	NA	47	EO	Over_35	Colorectal Cancer	Colon Adenocarcinoma	0	OTHER	0.2052	IMPACT468	0	0	Omentum	MSS	0.87	Stable	7	COAD	18.4089	1:DECEASED	Left	0	WHITE	Tumor	1	515	Metastasis	Male	Never	Never	Matched	IV	FOLFOX	mod-diff	10	1	1	1	1	NA	NA	NA	NA	NA	NA	NA
crc_eo_2020	P-0015443	P-0015443-T01-IM6	4.4	NA	40	EO	Over_35	Colorectal Cancer	Mucinous Adenocarcinoma of the Colon and Rectum	0	BRBPR	0.0573	IMPACT468	0	0	Omentum	MSS	0.45	Stable	5	MACR	26.0026	0:LIVING	Left	0	WHITE	Tumor	1	726	Metastasis	Male	Ever	Former	Matched	IV	XELOX + Bev	poorly-diff	30	1	1	1	1	NA	NA	NA	NA	NA	NA	NA
crc_eo_2020	P-0018249	P-0018249-T01-IM6	4.4	NA	47	EO	Over_35	Colorectal Cancer	Colon Adenocarcinoma	1	ABDOMINAL PAIN, BLOATING/ABDOMINAL GIRTH/PELVIC PRESSURE,PAIN; UPPER GI SX	0.3525	IMPACT468	1	0	Omentum	MSS	0.47	Stable	5	COAD	25	0:LIVING	Left	0	WHITE	Tumor	1	585	Metastasis	Male	Never	Former	Matched	IV	FOLFOX	well-diff	30	1	1	1	1	NA	NA	NA	NA	NA	NA	NA
crc_eo_2020	P-0019949	P-0019949-T01-IM6	37.7	NA	27	EO	Under_35	Colorectal Cancer	Rectal Adenocarcinoma	NA	NA	0	IMPACT468	NA	NA	Peritoneum	NA	21.96	Instable	43	READ	NA	NA	NA	NA	WHITE	Tumor	1	767	Metastasis	NA	NA	NA	Matched	NA	NA	NA	30	0	0	0	0	NA	NA	NA	NA	NA	NA	NA
crc_eo_2020	P-0020573	P-0020573-T02-IM6	1.8	NA	40	EO	Over_35	Colorectal Cancer	Colon Adenocarcinoma	0	ABDOMINAL PAIN, BLOATING/ABDOMINAL GIRTH/PELVIC PRESSURE,PAIN; CHANGE IN BOWEL HABITS	0.166	IMPACT468	0	0	Omentum	MSS	0.13	Stable	2	COAD	9.59895	1:DECEASED	Right	0	WHITE	Tumor	1	859	Metastasis	Male	Never	Never	Matched	IV	FOLFOX	poorly-diff	30	1	1	1	1	NA	NA	NA	NA	NA	NA	NA
crc_eo_2020	P-0021976	P-0021976-T01-IM6	0.9	NA	46	EO	Over_35	Colorectal Cancer	Colorectal Adenocarcinoma	0	ABDOMINAL PAIN, BLOATING/ABDOMINAL GIRTH/PELVIC PRESSURE,PAIN	0.0097	IMPACT468	0	1	Omentum	MSS	0	Stable	1	COADREAD	17.094	1:DECEASED	Right	0	WHITE	Tumor	1	657	Metastasis	Male	Never	Former	Matched	IV	FOLFOX	poorly-diff	10	1	1	1	1	NA	NA	NA	NA	NA	NA	NA
crc_eo_2020	P-0024823	P-0024823-T01-IM6	7.9	NA	43	EO	Over_35	Colorectal Cancer	Colon Adenocarcinoma	0	BRBPR	0.0959	IMPACT468	0	1	Peritoneum	MSS	0.25	Stable	9	COAD	31.3609	0:LIVING	Left	0	WHITE	Tumor	1	813	Metastasis	Male	Never	Never	Matched	IV	NA	mod-diff	20	0	1	1	1	NA	NA	NA	NA	NA	NA	NA
crc_eo_2020	P-0025444	P-0025444-T01-IM6	6.1	NA	40	EO	Over_35	Colorectal Cancer	Colon Adenocarcinoma	0	ABDOMINAL PAIN, BLOATING/ABDOMINAL GIRTH/PELVIC PRESSURE,PAIN; WEIGHT LOSS	0.0893	IMPACT468	0	0	Omentum	MSS	0.07	Stable	7	COAD	6.64037	1:DECEASED	Right	0	WHITE	Tumor	1	446	Metastasis	Male	Never	Never	Matched	III	FOLFIRINOX	poorly-diff	20	0	1	1	1	NA	NA	NA	NA	NA	NA	NA
crc_eo_2020	P-0025837	P-0025837-T01-IM6	3.5	NA	49	EO	Over_35	Colorectal Cancer	Colon Adenocarcinoma	0	OTHER	0.8235	IMPACT468	1	0	Peritoneum	MSS	1.03	Stable	4	COAD	18.4418	0:LIVING	Right	0	WHITE	Tumor	1	864	Metastasis	Female	Ever	Never	Matched	IV	FOLFOX + Bev	poorly-diff	60	1	1	1	1	NA	NA	NA	NA	NA	NA	NA
crc_eo_2020	P-0025883	P-0025883-T01-IM6	86	NA	46	EO	Over_35	Colorectal Cancer	Colon Adenocarcinoma	0	NA	0.0013	IMPACT468	1	NA	Mesentery	NA	38.59	Instable	98	COAD	NA	NA	NA	NA	WHITE	Tumor	1	580	Metastasis	NA	NA	NA	Matched	NA	NA	NA	30	0	0	0	0	NA	NA	NA	NA	NA	NA	NA
crc_eo_2020	P-0027648	P-0027648-T01-IM6	3.5	NA	34	EO	Under_35	Colorectal Cancer	Mucinous Adenocarcinoma of the Colon and Rectum	0	BRBPR; CHANGE IN BOWEL HABITS	0.1258	IMPACT468	0	1	Omentum	MSS	0.23	Stable	4	MACR	3.12295	0:LIVING	Left	0	WHITE	Tumor	1	748	Metastasis	Female	Never	Never	Matched	III	FOLFIRI	poorly-diff	20	0	1	1	1	NA	NA	NA	NA	NA	NA	NA
crc_eo_2020	P-0032065	P-0032065-T01-IM6	4.4	NA	41	EO	Over_35	Colorectal Cancer	Colorectal Adenocarcinoma	0	NA	0.4145	IMPACT468	0	0	Peritoneum	MSS	1.03	Stable	5	COADREAD	10.4865	0:LIVING	Right	0	ASIAN-FAR EAST/INDIAN SUBCONT	Tumor	1	573	Metastasis	Female	Never	Never	Matched	IV	FOLFOX	poorly-diff	60	1	1	1	1	NA	NA	NA	NA	NA	NA	NA
crc_eo_2020	P-0032718	P-0032718-T01-IM6	78.1	NA	30	EO	Under_35	Colorectal Cancer	Colorectal Adenocarcinoma	0	OTHER	0.0667	IMPACT468	0	NA	Omentum	MSI	39.53	Instable	89	COADREAD	NA	NA	Left	NA	WHITE	Tumor	1	680	Metastasis	Female	Never	Never	Matched	IV	NA	well-diff	40	0	0	0	0	NA	NA	NA	NA	NA	NA	NA
crc_eo_2020	P-0034929	P-0034929-T01-IM6	1.8	NA	42	EO	Over_35	Colorectal Cancer	Colorectal Adenocarcinoma	0	BRBPR; WEIGHT LOSS; ABDOMINAL PAIN, BLOATING/ABDOMINAL GIRTH/PELVIC PRESSURE,PAIN; CHANGE IN BOWEL HABITS	0.0005	IMPACT468	0	0	Peritoneum	MSS	0	Stable	2	COADREAD	4.60224	0:LIVING	Left	0	ASIAN-FAR EAST/INDIAN SUBCONT	Tumor	1	538	Metastasis	Male	Never	Former	Matched	IV	FOLFOX + Bev	poorly-diff	10	0	1	1	1	NA	NA	NA	NA	NA	NA	NA
crc_eo_2020	P-0035536	P-0035536-T01-IM6	0	NA	36	EO	Over_35	Colorectal Cancer	Colorectal Adenocarcinoma	0	NA	0.0055	IMPACT468	0	NA	Peritoneum	MSS	2.56	Do not report	NA	COADREAD	NA	NA	Right	NA	WHITE	Tumor	1	188	Metastasis	Male	Ever	Former	Matched	III	NA	poorly-diff	10	0	1	1	0	NA	NA	NA	NA	NA	NA	NA
crc_eo_2020	P-0038195	P-0038195-T01-IM6	7	NA	38	EO	Over_35	Colorectal Cancer	Colon Adenocarcinoma	1	FATIGUE	0.4354	IMPACT468	0	0	Peritoneum	MSS	1.43	Stable	8	COAD	33.9908	0:LIVING	Left	0	WHITE	Tumor	1	1081	Metastasis	Male	Never	Never	Matched	IV	FOLFOX	mod-diff	80	1	1	1	1	NA	NA	NA	NA	NA	NA	NA
[truncated: 20 more columns]

## Sheet: Table S6
Table S6: KRAS and SMAD4 mutations among 694 CRC patients
Study of Origin	Sample ID	Cancer Type	Cancer Type Detailed	Gene	Protein Change	Annotation	Custom Driver	Custom Driver Tiers	Functional Impact	Mutation Type	Variant Type	Copy #	COSMIC	MS	VS	Center	Chromosome	Start Pos	End Pos	Ref	Var	HGVSg	HGVSc	Allele Freq (T)	Allele Freq (N)	Variant Reads	Ref Reads	Variant Reads (Normal)	Ref Reads (Normal)	# Mut in Sample	Exon	gnomAD	ClinVar	dbSNP	SIGNAL	Age at Diagnosis	Age Groups	Age Subgroups	BMI	BMI categories	Impact TMB Score	Diabetes Mellitus History	First Symptoms at Diagnosis	Fraction Genome Altered	Gene Panel	Hypertension History	Metastasectomy	Metastatic Site	Molecular Subtype
Colorectal Cancer (MSK, JNCI 2021)	P-0001227-T01-IM3	Colorectal Cancer	Colon Adenocarcinoma	KRAS	G12C	OncoKB: Oncogenic, level_2, level_r1;CIViC: diagnosticCount: 1, predictiveCount: 54, prognosticCount: 1, predisposingCount: 0, oncogenicCount: 0, functionalCount: 0;MyCancerGenome: present;CancerHotspot: yes;3DHotspot: yes			MutationAssessor: impact: medium, score: 2.56;SIFT: impact: deleterious, score: 0.04;Polyphen-2: impact: probably_damaging, score: 0.991	Missense_Mutation	SNP	Diploid	25876	SOMATIC	Unknown	MSKCC	12	25398285	25398285	C	A	12:g.25398285C>A	ENST00000311936.3:c.34G>T	0.06		62	962		452	3	45327		Pathogenic/Likely_pathogenic			66	AO	AO	26.6	OW	3.3	0	Fatigue; Anemia; FOBT+	0.0134	IMPACT341	1	0		MSS
Colorectal Cancer (MSK, JNCI 2021)	P-0002235-T01-IM3	Colorectal Cancer	Colon Adenocarcinoma	KRAS	G12C	OncoKB: Oncogenic, level_2, level_r1;CIViC: diagnosticCount: 1, predictiveCount: 54, prognosticCount: 1, predisposingCount: 0, oncogenicCount: 0, functionalCount: 0;MyCancerGenome: present;CancerHotspot: yes;3DHotspot: yes			MutationAssessor: impact: medium, score: 2.56;SIFT: impact: deleterious, score: 0.04;Polyphen-2: impact: probably_damaging, score: 0.991	Missense_Mutation	SNP	Diploid	25876	SOMATIC	Unknown	MSKCC	12	25398285	25398285	C	A	12:g.25398285C>A	ENST00000311936.3:c.34G>T	0.35		250	459		495	4	45327		Pathogenic/Likely_pathogenic			80	AO	AO	30.8	OB	4.5	1	FOBT+	0.2151	IMPACT341	1	0		MSS
Colorectal Cancer (MSK, JNCI 2021)	P-0006181-T01-IM5	Colorectal Cancer	Rectal Adenocarcinoma	KRAS	G12C	OncoKB: Oncogenic, level_2, level_r1;CIViC: diagnosticCount: 1, predictiveCount: 54, prognosticCount: 1, predisposingCount: 0, oncogenicCount: 0, functionalCount: 0;MyCancerGenome: present;CancerHotspot: yes;3DHotspot: yes			MutationAssessor: impact: medium, score: 2.56;SIFT: impact: deleterious, score: 0.04;Polyphen-2: impact: probably_damaging, score: 0.991	Missense_Mutation	SNP	Diploid	25876	SOMATIC	Unknown	MSKCC	12	25398285	25398285	C	A	12:g.25398285C>A	ENST00000311936.3:c.34G>T	0.33		263	545		340	8	45327		Pathogenic/Likely_pathogenic			61	AO	AO	37.4	OB	7.9	0	Change in bowel habits; BRBPR	0.163	IMPACT410	0	0		MSS
Colorectal Cancer (MSK, JNCI 2021)	P-0007495-T01-IM5	Colorectal Cancer	Rectal Adenocarcinoma	KRAS	G12C	OncoKB: Oncogenic, level_2, level_r1;CIViC: diagnosticCount: 1, predictiveCount: 54, prognosticCount: 1, predisposingCount: 0, oncogenicCount: 0, functionalCount: 0;MyCancerGenome: present;CancerHotspot: yes;3DHotspot: yes			MutationAssessor: impact: medium, score: 2.56;SIFT: impact: deleterious, score: 0.04;Polyphen-2: impact: probably_damaging, score: 0.991	Missense_Mutation	SNP	Diploid	25876	SOMATIC	Unknown	MSKCC	12	25398285	25398285	C	A	12:g.25398285C>A	ENST00000311936.3:c.34G>T	0.32		271	585		408	14	45327		Pathogenic/Likely_pathogenic			78	AO	AO	25.1	OW	13.8	1	Fatigue; anemia	0	IMPACT410	1			MSS
Colorectal Cancer (MSK, JNCI 2021)	P-0010832-T01-IM5	Colorectal Cancer	Rectal Adenocarcinoma	KRAS	G12C	OncoKB: Oncogenic, level_2, level_r1;CIViC: diagnosticCount: 1, predictiveCount: 54, prognosticCount: 1, predisposingCount: 0, oncogenicCount: 0, functionalCount: 0;MyCancerGenome: present;CancerHotspot: yes;3DHotspot: yes			MutationAssessor: impact: medium, score: 2.56;SIFT: impact: deleterious, score: 0.04;Polyphen-2: impact: probably_damaging, score: 0.991	Missense_Mutation	SNP	Diploid	25876	SOMATIC	Unknown	MSKCC	12	25398285	25398285	C	A	12:g.25398285C>A	ENST00000311936.3:c.34G>T	0.18		64	288		369	6	45327		Pathogenic/Likely_pathogenic			25	EO	Under_35	19.1	NW	5.9	0	ABDOMINAL PAIN, BLOATING/ABDOMINAL GIRTH/PELVIC PRESSURE,PAIN	0.1491	IMPACT410	0	1		MSS
Colorectal Cancer (MSK, JNCI 2021)	P-0010960-T01-IM5	Colorectal Cancer	Colon Adenocarcinoma	KRAS	G12C	OncoKB: Oncogenic, level_2, level_r1;CIViC: diagnosticCount: 1, predictiveCount: 54, prognosticCount: 1, predisposingCount: 0, oncogenicCount: 0, functionalCount: 0;MyCancerGenome: present;CancerHotspot: yes;3DHotspot: yes			MutationAssessor: impact: medium, score: 2.56;SIFT: impact: deleterious, score: 0.04;Polyphen-2: impact: probably_damaging, score: 0.991	Missense_Mutation	SNP	Diploid	25876	SOMATIC	Unknown	MSKCC	12	25398285	25398285	C	A	12:g.25398285C>A	ENST00000311936.3:c.34G>T	0.19	0.0026	163	679	1	387	11	45327		Pathogenic/Likely_pathogenic			69	AO	AO	28.7	OW	10.8	0	incidentally found on colonoscopy	0.154	IMPACT410	0	0		MSS
Colorectal Cancer (MSK, JNCI 2021)	P-0012723-T01-IM5	Colorectal Cancer	Colon Adenocarcinoma	KRAS	G12C	OncoKB: Oncogenic, level_2, level_r1;CIViC: diagnosticCount: 1, predictiveCount: 54, prognosticCount: 1, predisposingCount: 0, oncogenicCount: 0, functionalCount: 0;MyCancerGenome: present;CancerHotspot: yes;3DHotspot: yes			MutationAssessor: impact: medium, score: 2.56;SIFT: impact: deleterious, score: 0.04;Polyphen-2: impact: probably_damaging, score: 0.991	Missense_Mutation	SNP	Diploid	25876	SOMATIC	Unknown	MSKCC	12	25398285	25398285	C	A	12:g.25398285C>A	ENST00000311936.3:c.34G>T	0.13		116	778		450	4	45327		Pathogenic/Likely_pathogenic			55	AO	AO		Unk	3.9	0	Unknown, no records from dx	0.0419	IMPACT410	0	1		MSS
Colorectal Cancer (MSK, JNCI 2021)	P-0013096-T01-IM5	Colorectal Cancer	Colon Adenocarcinoma	KRAS	G12C	OncoKB: Oncogenic, level_2, level_r1;CIViC: diagnosticCount: 1, predictiveCount: 54, prognosticCount: 1, predisposingCount: 0, oncogenicCount: 0, functionalCount: 0;MyCancerGenome: present;CancerHotspot: yes;3DHotspot: yes			MutationAssessor: impact: medium, score: 2.56;SIFT: impact: deleterious, score: 0.04;Polyphen-2: impact: probably_damaging, score: 0.991	Missense_Mutation	SNP	Diploid	25876	SOMATIC	Unknown	MSKCC	12	25398285	25398285	C	A	12:g.25398285C>A	ENST00000311936.3:c.34G>T	0.06	0.0023	52	766	1	438	3	45327		Pathogenic/Likely_pathogenic			33	EO	Under_35	22.8	NW	3	0	BRBPR	0.0366	IMPACT410	0	1		MSS
Colorectal Cancer (MSK, JNCI 2021)	P-0020681-T01-IM6	Colorectal Cancer	Colon Adenocarcinoma	KRAS	G12C	OncoKB: Oncogenic, level_2, level_r1;CIViC: diagnosticCount: 1, predictiveCount: 54, prognosticCount: 1, predisposingCount: 0, oncogenicCount: 0, functionalCount: 0;MyCancerGenome: present;CancerHotspot: yes;3DHotspot: yes			MutationAssessor: impact: medium, score: 2.56;SIFT: impact: deleterious, score: 0.04;Polyphen-2: impact: probably_damaging, score: 0.991	Missense_Mutation	SNP	Diploid	25876	SOMATIC	Unknown	MSKCC	12	25398285	25398285	C	A	12:g.25398285C>A	ENST00000311936.3:c.34G>T	0.11		102	865		914	6	45327		Pathogenic/Likely_pathogenic			39	EO	Over_35	30.4	OB	5.3	0	CHANGE IN BOWEL HABITS	0.0085	IMPACT468	0	1		MSS
Colorectal Cancer (MSK, JNCI 2021)	P-0025017-T01-IM6	Colorectal Cancer	Colorectal Adenocarcinoma	KRAS	G12C	OncoKB: Oncogenic, level_2, level_r1;CIViC: diagnosticCount: 1, predictiveCount: 54, prognosticCount: 1, predisposingCount: 0, oncogenicCount: 0, functionalCount: 0;MyCancerGenome: present;CancerHotspot: yes;3DHotspot: yes			MutationAssessor: impact: medium, score: 2.56;SIFT: impact: deleterious, score: 0.04;Polyphen-2: impact: probably_damaging, score: 0.991	Missense_Mutation	SNP	Diploid	25876	SOMATIC	Unknown	MSKCC	12	25398285	25398285	C	A	12:g.25398285C>A	ENST00000311936.3:c.34G>T	0.11		58	489		456	7	45327		Pathogenic/Likely_pathogenic			41	EO	Over_35	22.3	NW	6.1	0		0.079	IMPACT468	0	1		MSS
Colorectal Cancer (MSK, JNCI 2021)	P-0025472-T01-IM6	Colorectal Cancer	Colon Adenocarcinoma	KRAS	G12C	OncoKB: Oncogenic, level_2, level_r1;CIViC: diagnosticCount: 1, predictiveCount: 54, prognosticCount: 1, predisposingCount: 0, oncogenicCount: 0, functionalCount: 0;MyCancerGenome: present;CancerHotspot: yes;3DHotspot: yes			MutationAssessor: impact: medium, score: 2.56;SIFT: impact: deleterious, score: 0.04;Polyphen-2: impact: probably_damaging, score: 0.991	Missense_Mutation	SNP	Diploid	25876	SOMATIC	Unknown	MSKCC	12	25398285	25398285	C	A	12:g.25398285C>A	ENST00000311936.3:c.34G>T	0.14		102	618		522	9	45327		Pathogenic/Likely_pathogenic			45	EO	Over_35	27.8	OW	7.9	0	FATIGUE	0.058	IMPACT468	0			MSS
Colorectal Cancer (MSK, JNCI 2021)	P-0027760-T01-IM6	Colorectal Cancer	Rectal Adenocarcinoma	KRAS	G12C	OncoKB: Oncogenic, level_2, level_r1;CIViC: diagnosticCount: 1, predictiveCount: 54, prognosticCount: 1, predisposingCount: 0, oncogenicCount: 0, functionalCount: 0;MyCancerGenome: present;CancerHotspot: yes;3DHotspot: yes			MutationAssessor: impact: medium, score: 2.56;SIFT: impact: deleterious, score: 0.04;Polyphen-2: impact: probably_damaging, score: 0.991	Missense_Mutation	SNP	Diploid	25876	SOMATIC	Unknown	MSKCC	12	25398285	25398285	C	A	12:g.25398285C>A	ENST00000311936.3:c.34G>T	0.28		198	497		465	6	45327		Pathogenic/Likely_pathogenic			43	EO	Over_35	26.7	OW	5.3	0	ABDOMINAL PAIN, BLOATING/ABDOMINAL GIRTH/PELVIC PRESSURE,PAIN; WEIGHT LOSS	0.1465	IMPACT468	0	1		MSS
Colorectal Cancer (MSK, JNCI 2021)	P-0028544-T01-IM6	Colorectal Cancer	Colorectal Adenocarcinoma	KRAS	G12C	OncoKB: Oncogenic, level_2, level_r1;CIViC: diagnosticCount: 1, predictiveCount: 54, prognosticCount: 1, predisposingCount: 0, oncogenicCount: 0, functionalCount: 0;MyCancerGenome: present;CancerHotspot: yes;3DHotspot: yes			MutationAssessor: impact: medium, score: 2.56;SIFT: impact: deleterious, score: 0.04;Polyphen-2: impact: probably_damaging, score: 0.991	Missense_Mutation	SNP	Diploid	25876	SOMATIC	Unknown	MSKCC	12	25398285	25398285	C	A	12:g.25398285C>A	ENST00000311936.3:c.34G>T	0.3		132	307		411	8	45327		Pathogenic/Likely_pathogenic			35	EO	Under_35	31.5	OB	7	0	BRBPR; OTHER	0.212	IMPACT468	0			MSS
Colorectal Cancer (MSK, JNCI 2021)	P-0031221-T01-IM6	Colorectal Cancer	Colorectal Adenocarcinoma	KRAS	G12C	OncoKB: Oncogenic, level_2, level_r1;CIViC: diagnosticCount: 1, predictiveCount: 54, prognosticCount: 1, predisposingCount: 0, oncogenicCount: 0, functionalCount: 0;MyCancerGenome: present;CancerHotspot: yes;3DHotspot: yes			MutationAssessor: impact: medium, score: 2.56;SIFT: impact: deleterious, score: 0.04;Polyphen-2: impact: probably_damaging, score: 0.991	Missense_Mutation	SNP	Diploid	25876	SOMATIC	Unknown	MSKCC	12	25398285	25398285	C	A	12:g.25398285C>A	ENST00000311936.3:c.34G>T	0.63		417	242		538	6	45327		Pathogenic/Likely_pathogenic			49	EO	Over_35	24.8	NW	5.3		ABDOMINAL PAIN, BLOATING/ABDOMINAL GIRTH/PELVIC PRESSURE,PAIN	0.4512	IMPACT468				MSS
Colorectal Cancer (MSK, JNCI 2021)	P-0036053-T01-IM6	Colorectal Cancer	Colon Adenocarcinoma	KRAS	G12C	OncoKB: Oncogenic, level_2, level_r1;CIViC: diagnosticCount: 1, predictiveCount: 54, prognosticCount: 1, predisposingCount: 0, oncogenicCount: 0, functionalCount: 0;MyCancerGenome: present;CancerHotspot: yes;3DHotspot: yes			MutationAssessor: impact: medium, score: 2.56;SIFT: impact: deleterious, score: 0.04;Polyphen-2: impact: probably_damaging, score: 0.991	Missense_Mutation	SNP	Diploid	25876	SOMATIC	Unknown	MSKCC	12	25398285	25398285	C	A	12:g.25398285C>A	ENST00000311936.3:c.34G>T	0.64		482	277		381	5	45327		Pathogenic/Likely_pathogenic			44	EO	Over_35	23.3	NW	4.4	0	SCREENING COLONOSCOPY	0.4867	IMPACT468	0	1		MSS
Colorectal Cancer (MSK, JNCI 2021)	P-0036448-T01-IM6	Colorectal Cancer	Rectal Adenocarcinoma	KRAS	G12C	OncoKB: Oncogenic, level_2, level_r1;CIViC: diagnosticCount: 1, predictiveCount: 54, prognosticCount: 1, predisposingCount: 0, oncogenicCount: 0, functionalCount: 0;MyCancerGenome: present;CancerHotspot: yes;3DHotspot: yes			MutationAssessor: impact: medium, score: 2.56;SIFT: impact: deleterious, score: 0.04;Polyphen-2: impact: probably_damaging, score: 0.991	Missense_Mutation	SNP	Diploid	25876	SOMATIC	Unknown	MSKCC	12	25398285	25398285	C	A	12:g.25398285C>A	ENST00000311936.3:c.34G>T	0.03		21	681		408	1	45327		Pathogenic/Likely_pathogenic			48	EO	Over_35	25.7	NW	0.9	0	ABDOMINAL PAIN, BLOATING/ABDOMINAL GIRTH/PELVIC PRESSURE,PAIN; WEIGHT LOSS	0.0204	IMPACT468	1			MSS
Colorectal Cancer (MSK, JNCI 2021)	P-0037009-T01-IM6	Colorectal Cancer	Colorectal Adenocarcinoma	KRAS	G12C	OncoKB: Oncogenic, level_2, level_r1;CIViC: diagnosticCount: 1, predictiveCount: 54, prognosticCount: 1, predisposingCount: 0, oncogenicCount: 0, functionalCount: 0;MyCancerGenome: present;CancerHotspot: yes;3DHotspot: yes			MutationAssessor: impact: medium, score: 2.56;SIFT: impact: deleterious, score: 0.04;Polyphen-2: impact: probably_damaging, score: 0.991	Missense_Mutation	SNP	Diploid	25876	SOMATIC	Unknown	MSKCC	12	25398285	25398285	C	A	12:g.25398285C>A	ENST00000311936.3:c.34G>T	0.27		16	44		417	3	45327		Pathogenic/Likely_pathogenic			48	EO	Over_35	22.9	NW	2.6	0	ABDOMINAL PAIN, BLOATING/ABDOMINAL GIRTH/PELVIC PRESSURE,PAIN	0.2008	IMPACT468	0	0		MSS
Colorectal Cancer (MSK, JNCI 2021)	P-0039437-T01-IM6	Colorectal Cancer	Rectal Adenocarcinoma	KRAS	G12C	OncoKB: Oncogenic, level_2, level_r1;CIViC: diagnosticCount: 1, predictiveCount: 54, prognosticCount: 1, predisposingCount: 0, oncogenicCount: 0, functionalCount: 0;MyCancerGenome: present;CancerHotspot: yes;3DHotspot: yes			MutationAssessor: impact: medium, score: 2.56;SIFT: impact: deleterious, score: 0.04;Polyphen-2: impact: probably_damaging, score: 0.991	Missense_Mutation	SNP	Diploid	25876	SOMATIC	Unknown	MSKCC	12	25398285	25398285	C	A	12:g.25398285C>A	ENST00000311936.3:c.34G>T	0.11		61	493		358	7	45327		Pathogenic/Likely_pathogenic			45	EO	Over_35	27.2	OW	6.1	0	BRBPR; FATIGUE	0	IMPACT468	0	0		MSS
Colorectal Cancer (MSK, JNCI 2021)	P-0039442-T01-IM6	Colorectal Cancer	Colorectal Adenocarcinoma	KRAS	G12C	OncoKB: Oncogenic, level_2, level_r1;CIViC: diagnosticCount: 1, predictiveCount: 54, prognosticCount: 1, predisposingCount: 0, oncogenicCount: 0, functionalCount: 0;MyCancerGenome: present;CancerHotspot: yes;3DHotspot: yes			MutationAssessor: impact: medium, score: 2.56;SIFT: impact: deleterious, score: 0.04;Polyphen-2: impact: probably_damaging, score: 0.991	Missense_Mutation	SNP	Diploid	25876	SOMATIC	Unknown	MSKCC	12	25398285	25398285	C	A	12:g.25398285C>A	ENST00000311936.3:c.34G>T	0.07	0.0022	30	415	1	445	9	45327		Pathogenic/Likely_pathogenic			37	EO	Over_35	19	NW	7.9	0	ABDOMINAL PAIN, BLOATING/ABDOMINAL GIRTH/PELVIC PRESSURE,PAIN	0.0061	IMPACT468	1	0		MSS
Colorectal Cancer (MSK, JNCI 2021)	P-0004018-T01-IM3	Colorectal Cancer	Rectal Adenocarcinoma	KRAS	G12S	OncoKB: Oncogenic, level_3b, level_r1;CIViC: diagnosticCount: 1, predictiveCount: 28, prognosticCount: 0, predisposingCount: 0, oncogenicCount: 0, functionalCount: 0;MyCancerGenome: present;CancerHotspot: yes;3DHotspot: yes			MutationAssessor: impact: neutral, score: 0.17;SIFT: impact: deleterious, score: 0.03;Polyphen-2: impact: possibly_damaging, score: 0.582	Missense_Mutation	SNP	Diploid	25876	SOMATIC	Unknown	MSKCC	12	25398285	25398285	C	T	12:g.25398285C>T	ENST00000311936.3:c.34G>A	0.64		422	237		430	12	45327		Pathogenic			59	AO	AO	27.7	OW	13.4	0	change in bowel habits, blood in stool	0.3038	IMPACT341	0	1		MSS
Colorectal Cancer (MSK, JNCI 2021)	P-0007975-T01-IM5	Colorectal Cancer	Rectal Adenocarcinoma	KRAS	G12S	OncoKB: Oncogenic, level_3b, level_r1;CIViC: diagnosticCount: 1, predictiveCount: 28, prognosticCount: 0, predisposingCount: 0, oncogenicCount: 0, functionalCount: 0;MyCancerGenome: present;CancerHotspot: yes;3DHotspot: yes			MutationAssessor: impact: neutral, score: 0.17;SIFT: impact: deleterious, score: 0.03;Polyphen-2: impact: possibly_damaging, score: 0.582	Missense_Mutation	SNP	Diploid	25876	SOMATIC	Unknown	MSKCC	12	25398285	25398285	C	T	12:g.25398285C>T	ENST00000311936.3:c.34G>A	0.09	0.007	95	962	3	428	3	45327		Pathogenic			71	AO	AO	21.8	NW	3	1	Abdominal pain	0.0322	IMPACT410	0	0		MSS
Colorectal Cancer (MSK, JNCI 2021)	P-0008841-T01-IM5	Colorectal Cancer	Rectal Adenocarcinoma	KRAS	G12S	OncoKB: Oncogenic, level_3b, level_r1;CIViC: diagnosticCount: 1, predictiveCount: 28, prognosticCount: 0, predisposingCount: 0, oncogenicCount: 0, functionalCount: 0;MyCancerGenome: present;CancerHotspot: yes;3DHotspot: yes			MutationAssessor: impact: neutral, score: 0.17;SIFT: impact: deleterious, score: 0.03;Polyphen-2: impact: possibly_damaging, score: 0.582	Missense_Mutation	SNP	Diploid	25876	SOMATIC	Unknown	MSKCC	12	25398285	25398285	C	T	12:g.25398285C>T	ENST00000311936.3:c.34G>A	0.07		64	860		399	4	45327		Pathogenic			67	AO	AO	38.9	OB	3.9	0	incidentally found on scan	0.0009	IMPACT410	1	0		MSS
Colorectal Cancer (MSK, JNCI 2021)	P-0009053-T01-IM5	Colorectal Cancer	Rectal Adenocarcinoma	KRAS	G12S	OncoKB: Oncogenic, level_3b, level_r1;CIViC: diagnosticCount: 1, predictiveCount: 28, prognosticCount: 0, predisposingCount: 0, oncogenicCount: 0, functionalCount: 0;MyCancerGenome: present;CancerHotspot: yes;3DHotspot: yes			MutationAssessor: impact: neutral, score: 0.17;SIFT: impact: deleterious, score: 0.03;Polyphen-2: impact: possibly_damaging, score: 0.582	Missense_Mutation	SNP	Diploid	25876	SOMATIC	Unknown	MSKCC	12	25398285	25398285	C	T	12:g.25398285C>T	ENST00000311936.3:c.34G>A	0.16		162	870		364	5	45327		Pathogenic			69	AO	AO	27.1	OW	4.9	0	Anemia	0.0035	IMPACT410	0	0		MSS
Colorectal Cancer (MSK, JNCI 2021)	P-0009058-T01-IM5	Colorectal Cancer	Colon Adenocarcinoma	KRAS	G12S	OncoKB: Oncogenic, level_3b, level_r1;CIViC: diagnosticCount: 1, predictiveCount: 28, prognosticCount: 0, predisposingCount: 0, oncogenicCount: 0, functionalCount: 0;MyCancerGenome: present;CancerHotspot: yes;3DHotspot: yes			MutationAssessor: impact: neutral, score: 0.17;SIFT: impact: deleterious, score: 0.03;Polyphen-2: impact: possibly_damaging, score: 0.582	Missense_Mutation	SNP	Diploid	25876	SOMATIC	Unknown	MSKCC	12	25398285	25398285	C	T	12:g.25398285C>T	ENST00000311936.3:c.34G>A	0.44		226	292		355	7	45327		Pathogenic			51	AO	AO	32.2	OB	6.9	0	Other; fissure	0.1978	IMPACT410	0	0		MSS
Colorectal Cancer (MSK, JNCI 2021)	P-0012100-T01-IM5	Colorectal Cancer	Colon Adenocarcinoma	KRAS	G12S	OncoKB: Oncogenic, level_3b, level_r1;CIViC: diagnosticCount: 1, predictiveCount: 28, prognosticCount: 0, predisposingCount: 0, oncogenicCount: 0, functionalCount: 0;MyCancerGenome: present;CancerHotspot: yes;3DHotspot: yes			MutationAssessor: impact: neutral, score: 0.17;SIFT: impact: deleterious, score: 0.03;Polyphen-2: impact: possibly_damaging, score: 0.582	Missense_Mutation	SNP	Diploid	25876	SOMATIC	Unknown	MSKCC	12	25398285	25398285	C	T	12:g.25398285C>T	ENST00000311936.3:c.34G>A	0.33		225	455		366	8	45327		Pathogenic			74	AO	AO	29.1	OW	7.9	0	unknown, pt initially diagnosed in 1986 and did not have records	0.1164	IMPACT410	1	0		MSS
Colorectal Cancer (MSK, JNCI 2021)	P-0023513-T01-IM6	Colorectal Cancer	Colon Adenocarcinoma	KRAS	G12S	OncoKB: Oncogenic, level_3b, level_r1;CIViC: diagnosticCount: 1, predictiveCount: 28, prognosticCount: 0, predisposingCount: 0, oncogenicCount: 0, functionalCount: 0;MyCancerGenome: present;CancerHotspot: yes;3DHotspot: yes			MutationAssessor: impact: neutral, score: 0.17;SIFT: impact: deleterious, score: 0.03;Polyphen-2: impact: possibly_damaging, score: 0.582	Missense_Mutation	SNP	Diploid	25876	SOMATIC	Unknown	MSKCC	12	25398285	25398285	C	T	12:g.25398285C>T	ENST00000311936.3:c.34G>A	0.25		231	682		768	5	45327		Pathogenic			31	EO	Under_35	28.6	OW	4.4	0	ABDOMINAL PAIN, BLOATING/ABDOMINAL GIRTH/PELVIC PRESSURE,PAIN	0.4019	IMPACT468	0	0		MSS
Colorectal Cancer (MSK, JNCI 2021)	P-0028772-T01-IM6	Colorectal Cancer	Rectal Adenocarcinoma	KRAS	G12S	OncoKB: Oncogenic, level_3b, level_r1;CIViC: diagnosticCount: 1, predictiveCount: 28, prognosticCount: 0, predisposingCount: 0, oncogenicCount: 0, functionalCount: 0;MyCancerGenome: present;CancerHotspot: yes;3DHotspot: yes			MutationAssessor: impact: neutral, score: 0.17;SIFT: impact: deleterious, score: 0.03;Polyphen-2: impact: possibly_damaging, score: 0.582	Missense_Mutation	SNP	Diploid	25876	SOMATIC	Unknown	MSKCC	12	25398285	25398285	C	T	12:g.25398285C>T	ENST00000311936.3:c.34G>A	0.7		238	104		389	5	45327		Pathogenic			44	EO	Over_35	34.5	OB	4.4	0	ABDOMINAL PAIN, BLOATING/ABDOMINAL GIRTH/PELVIC PRESSURE,PAIN	0.6039	IMPACT468	1	1		MSS
Colorectal Cancer (MSK, JNCI 2021)	P-0035548-T01-IM6	Colorectal Cancer	Colon Adenocarcinoma	KRAS	G12S	OncoKB: Oncogenic, level_3b, level_r1;CIViC: diagnosticCount: 1, predictiveCount: 28, prognosticCount: 0, predisposingCount: 0, oncogenicCount: 0, functionalCount: 0;MyCancerGenome: present;CancerHotspot: yes;3DHotspot: yes			MutationAssessor: impact: neutral, score: 0.17;SIFT: impact: deleterious, score: 0.03;Polyphen-2: impact: possibly_damaging, score: 0.582	Missense_Mutation	SNP	Diploid	25876	SOMATIC	Unknown	MSKCC	12	25398285	25398285	C	T	12:g.25398285C>T	ENST00000311936.3:c.34G>A	0.37		154	266		554	7	45327		Pathogenic			44	EO	Over_35	47	OB	6.1	0	BRBPR	0.1804	IMPACT468	0	1		MSS
Colorectal Cancer (MSK, JNCI 2021)	P-0039557-T01-IM6	Colorectal Cancer	Colon Adenocarcinoma	KRAS	G12S	OncoKB: Oncogenic, level_3b, level_r1;CIViC: diagnosticCount: 1, predictiveCount: 28, prognosticCount: 0, predisposingCount: 0, oncogenicCount: 0, functionalCount: 0;MyCancerGenome: present;CancerHotspot: yes;3DHotspot: yes			MutationAssessor: impact: neutral, score: 0.17;SIFT: impact: deleterious, score: 0.03;Polyphen-2: impact: possibly_damaging, score: 0.582	Missense_Mutation	SNP	Diploid	25876	SOMATIC	Unknown	MSKCC	12	25398285	25398285	C	T	12:g.25398285C>T	ENST00000311936.3:c.34G>A	0.17		80	393		330	5	45327		Pathogenic			33	EO	Under_35	31.5	OB	4.4	0	CHANGE IN BOWEL HABITS	0.0174	IMPACT468	0	0		MSS
Colorectal Cancer (MSK, JNCI 2021)	P-0000674-T01-IM3	Colorectal Cancer	Rectal Adenocarcinoma	KRAS	G12V	OncoKB: Oncogenic, level_3b, level_r1;CIViC: diagnosticCount: 0, predictiveCount: 32, prognosticCount: 1, predisposingCount: 0, oncogenicCount: 0, functionalCount: 0;MyCancerGenome: present;CancerHotspot: yes;3DHotspot: yes			MutationAssessor: impact: low, score: 1.84;SIFT: impact: deleterious, score: 0;Polyphen-2: impact: probably_damaging, score: 0.972	Missense_Mutation	SNP	Diploid	25876	SOMATIC	Unknown	MSKCC	12	25398284	25398284	C	A	12:g.25398284C>A	ENST00000311936.3:c.35G>T	0.31		301	677		255	6	45327		Pathogenic			65	AO	AO	22	NW	6.7	0	Change in bowel habits; abdominal pain	0.2851	IMPACT341	1	0		MSS
Colorectal Cancer (MSK, JNCI 2021)	P-0001940-T01-IM3	Colorectal Cancer	Colon Adenocarcinoma	KRAS	G12V	OncoKB: Oncogenic, level_3b, level_r1;CIViC: diagnosticCount: 0, predictiveCount: 32, prognosticCount: 1, predisposingCount: 0, oncogenicCount: 0, functionalCount: 0;MyCancerGenome: present;CancerHotspot: yes;3DHotspot: yes			MutationAssessor: impact: low, score: 1.84;SIFT: impact: deleterious, score: 0;Polyphen-2: impact: probably_damaging, score: 0.972	Missense_Mutation	SNP	Diploid	25876	UNKNOWN	NA	MSKCC	12	25398284	25398284	C	A	12:g.25398284C>A	ENST00000311936.3:c.35G>T	0.24		187	585		858	10	45327		Pathogenic			75	AO	AO	24	NW	11.2	0	Screening colonoscopy	0.0002	IMPACT341	1	0		MSS
Colorectal Cancer (MSK, JNCI 2021)	P-0002728-T01-IM3	Colorectal Cancer	Colon Adenocarcinoma	KRAS	G12V	OncoKB: Oncogenic, level_3b, level_r1;CIViC: diagnosticCount: 0, predictiveCount: 32, prognosticCount: 1, predisposingCount: 0, oncogenicCount: 0, functionalCount: 0;MyCancerGenome: present;CancerHotspot: yes;3DHotspot: yes			MutationAssessor: impact: low, score: 1.84;SIFT: impact: deleterious, score: 0;Polyphen-2: impact: probably_damaging, score: 0.972	Missense_Mutation	SNP	Diploid	25876	SOMATIC	Unknown	MSKCC	12	25398284	25398284	C	A	12:g.25398284C>A	ENST00000311936.3:c.35G>T	0.25		197	604		697	7	45327		Pathogenic			52	AO	AO	26.7	OW	7.8	1	abdominal pain	0.1537	IMPACT341	1	1		MSS
Colorectal Cancer (MSK, JNCI 2021)	P-0002752-T01-IM3	Colorectal Cancer	Colon Adenocarcinoma	KRAS	G12V	OncoKB: Oncogenic, level_3b, level_r1;CIViC: diagnosticCount: 0, predictiveCount: 32, prognosticCount: 1, predisposingCount: 0, oncogenicCount: 0, functionalCount: 0;MyCancerGenome: present;CancerHotspot: yes;3DHotspot: yes			MutationAssessor: impact: low, score: 1.84;SIFT: impact: deleterious, score: 0;Polyphen-2: impact: probably_damaging, score: 0.972	Missense_Mutation	SNP	Diploid	25876	SOMATIC	Unknown	MSKCC	12	25398284	25398284	C	A	12:g.25398284C>A	ENST00000311936.3:c.35G>T	0.2		19	74		443	5	45327		Pathogenic			53	AO	AO	29.6	OW	5.6	0	Abdominal pain	0.1792	IMPACT341	0	1		MSS
Colorectal Cancer (MSK, JNCI 2021)	P-0003210-T01-IM5	Colorectal Cancer	Colon Adenocarcinoma	KRAS	G12V	OncoKB: Oncogenic, level_3b, level_r1;CIViC: diagnosticCount: 0, predictiveCount: 32, prognosticCount: 1, predisposingCount: 0, oncogenicCount: 0, functionalCount: 0;MyCancerGenome: present;CancerHotspot: yes;3DHotspot: yes			MutationAssessor: impact: low, score: 1.84;SIFT: impact: deleterious, score: 0;Polyphen-2: impact: probably_damaging, score: 0.972	Missense_Mutation	SNP	Diploid	25876	SOMATIC	Unknown	MSKCC	12	25398284	25398284	C	A	12:g.25398284C>A	ENST00000311936.3:c.35G>T	0.42		347	474		305	8	45327		Pathogenic			56	AO	AO	26.7	OW	7.9	0	rectal bleeding, epigastric pain	0.1784	IMPACT410	0	0		MSS
Colorectal Cancer (MSK, JNCI 2021)	P-0003756-T01-IM5	Colorectal Cancer	Rectal Adenocarcinoma	KRAS	G12V	OncoKB: Oncogenic, level_3b, level_r1;CIViC: diagnosticCount: 0, predictiveCount: 32, prognosticCount: 1, predisposingCount: 0, oncogenicCount: 0, functionalCount: 0;MyCancerGenome: present;CancerHotspot: yes;3DHotspot: yes			MutationAssessor: impact: low, score: 1.84;SIFT: impact: deleterious, score: 0;Polyphen-2: impact: probably_damaging, score: 0.972	Missense_Mutation	SNP	Diploid	25876	SOMATIC	Unknown	MSKCC	12	25398284	25398284	C	A	12:g.25398284C>A	ENST00000311936.3:c.35G>T	0.53		319	287		372	5	45327		Pathogenic			61	AO	AO	25.1	OW	4.9	1	pain	0.1573	IMPACT410	0	0		MSS
Colorectal Cancer (MSK, JNCI 2021)	P-0003791-T01-IM5	Colorectal Cancer	Rectal Adenocarcinoma	KRAS	G12V	OncoKB: Oncogenic, level_3b, level_r1;CIViC: diagnosticCount: 0, predictiveCount: 32, prognosticCount: 1, predisposingCount: 0, oncogenicCount: 0, functionalCount: 0;MyCancerGenome: present;CancerHotspot: yes;3DHotspot: yes			MutationAssessor: impact: low, score: 1.84;SIFT: impact: deleterious, score: 0;Polyphen-2: impact: probably_damaging, score: 0.972	Missense_Mutation	SNP	Diploid	25876	SOMATIC	Unknown	MSKCC	12	25398284	25398284	C	A	12:g.25398284C>A	ENST00000311936.3:c.35G>T	0.17		157	764		260	10	45327		Pathogenic			57	AO	AO	23.5	NW	9.8	0	Change in bowel habits; abdominal pain	0.1333	IMPACT410	0	0		MSS
Colorectal Cancer (MSK, JNCI 2021)	P-0004716-T02-IM5	Colorectal Cancer	Colon Adenocarcinoma	KRAS	G12V	OncoKB: Oncogenic, level_3b, level_r1;CIViC: diagnosticCount: 0, predictiveCount: 32, prognosticCount: 1, predisposingCount: 0, oncogenicCount: 0, functionalCount: 0;MyCancerGenome: present;CancerHotspot: yes;3DHotspot: yes			MutationAssessor: impact: low, score: 1.84;SIFT: impact: deleterious, score: 0;Polyphen-2: impact: probably_damaging, score: 0.972	Missense_Mutation	SNP	Diploid	25876	SOMATIC	Unknown	MSKCC	12	25398284	25398284	C	A	12:g.25398284C>A	ENST00000311936.3:c.35G>T	0.31		173	394		299	11	45327		Pathogenic			67	AO	AO	21.4	NW	10.8	0	Fatigue; BRBPR; change in bowel habits	0.2192	IMPACT410	0	1		MSS
Colorectal Cancer (MSK, JNCI 2021)	P-0005172-T01-IM5	Colorectal Cancer	Colon Adenocarcinoma	KRAS	G12V	OncoKB: Oncogenic, level_3b, level_r1;CIViC: diagnosticCount: 0, predictiveCount: 32, prognosticCount: 1, predisposingCount: 0, oncogenicCount: 0, functionalCount: 0;MyCancerGenome: present;CancerHotspot: yes;3DHotspot: yes			MutationAssessor: impact: low, score: 1.84;SIFT: impact: deleterious, score: 0;Polyphen-2: impact: probably_damaging, score: 0.972	Missense_Mutation	SNP	Diploid	25876	SOMATIC	Unknown	MSKCC	12	25398284	25398284	C	A	12:g.25398284C>A	ENST00000311936.3:c.35G>T	0.17		93	469		417	5	45327		Pathogenic			59	AO	AO	31.4	OB	4.9	0	Abdominal pain; fatigue	0.1087	IMPACT410	0	0		MSS
Colorectal Cancer (MSK, JNCI 2021)	P-0005311-T02-IM5	Colorectal Cancer	Colon Adenocarcinoma	KRAS	G12V	OncoKB: Oncogenic, level_3b, level_r1;CIViC: diagnosticCount: 0, predictiveCount: 32, prognosticCount: 1, predisposingCount: 0, oncogenicCount: 0, functionalCount: 0;MyCancerGenome: present;CancerHotspot: yes;3DHotspot: yes			MutationAssessor: impact: low, score: 1.84;SIFT: impact: deleterious, score: 0;Polyphen-2: impact: probably_damaging, score: 0.972	Missense_Mutation	SNP	Diploid	25876	SOMATIC	Unknown	MSKCC	12	25398284	25398284	C	A	12:g.25398284C>A	ENST00000311936.3:c.35G>T	0.13		108	743		335	7	45327		Pathogenic			59	AO	AO		OB	7.9	0		0.0092	IMPACT410	0	1		MSS
Colorectal Cancer (MSK, JNCI 2021)	P-0006693-T01-IM5	Colorectal Cancer	Colon Adenocarcinoma	KRAS	G12V	OncoKB: Oncogenic, level_3b, level_r1;CIViC: diagnosticCount: 0, predictiveCount: 32, prognosticCount: 1, predisposingCount: 0, oncogenicCount: 0, functionalCount: 0;MyCancerGenome: present;CancerHotspot: yes;3DHotspot: yes			MutationAssessor: impact: low, score: 1.84;SIFT: impact: deleterious, score: 0;Polyphen-2: impact: probably_damaging, score: 0.972	Missense_Mutation	SNP	Diploid	25876	SOMATIC	Unknown	MSKCC	12	25398284	25398284	C	A	12:g.25398284C>A	ENST00000311936.3:c.35G>T	0.15		68	372		354	7	45327		Pathogenic			35	EO	Under_35	23.4	NW	6.9	0	BRBPR	0.2168	IMPACT410	0	0		MSS
Colorectal Cancer (MSK, JNCI 2021)	P-0007511-T01-IM5	Colorectal Cancer	Colon Adenocarcinoma	KRAS	G12V	OncoKB: Oncogenic, level_3b, level_r1;CIViC: diagnosticCount: 0, predictiveCount: 32, prognosticCount: 1, predisposingCount: 0, oncogenicCount: 0, functionalCount: 0;MyCancerGenome: present;CancerHotspot: yes;3DHotspot: yes			MutationAssessor: impact: low, score: 1.84;SIFT: impact: deleterious, score: 0;Polyphen-2: impact: probably_damaging, score: 0.972	Missense_Mutation	SNP	Diploid	25876	SOMATIC	Unknown	MSKCC	12	25398284	25398284	C	A	12:g.25398284C>A	ENST00000311936.3:c.35G>T	0.5		456	464		383	10	45327		Pathogenic			50	AO	AO	21.8	NW	9.8	0	RECTAL PAIN; CHANGE IN BOWEL HABITS; BRBPR	0.1771	IMPACT410	0	0		MSS
Colorectal Cancer (MSK, JNCI 2021)	P-0007596-T01-IM5	Colorectal Cancer	Colon Adenocarcinoma	KRAS	G12V	OncoKB: Oncogenic, level_3b, level_r1;CIViC: diagnosticCount: 0, predictiveCount: 32, prognosticCount: 1, predisposingCount: 0, oncogenicCount: 0, functionalCount: 0;MyCancerGenome: present;CancerHotspot: yes;3DHotspot: yes			MutationAssessor: impact: low, score: 1.84;SIFT: impact: deleterious, score: 0;Polyphen-2: impact: probably_damaging, score: 0.972	Missense_Mutation	SNP	Diploid	25876	SOMATIC	Unknown	MSKCC	12	25398284	25398284	C	A	12:g.25398284C>A	ENST00000311936.3:c.35G>T	0.19		157	676		397	59	45327		Pathogenic			67	AO	AO	35.1	OB	58	0	incidentally found on colonoscopy	0.1282	IMPACT410	1			MSI
Colorectal Cancer (MSK, JNCI 2021)	P-0007602-T01-IM5	Colorectal Cancer	Colon Adenocarcinoma	KRAS	G12V	OncoKB: Oncogenic, level_3b, level_r1;CIViC: diagnosticCount: 0, predictiveCount: 32, prognosticCount: 1, predisposingCount: 0, oncogenicCount: 0, functionalCount: 0;MyCancerGenome: present;CancerHotspot: yes;3DHotspot: yes			MutationAssessor: impact: low, score: 1.84;SIFT: impact: deleterious, score: 0;Polyphen-2: impact: probably_damaging, score: 0.972	Missense_Mutation	SNP	Diploid	25876	SOMATIC	Unknown	MSKCC	12	25398284	25398284	C	A	12:g.25398284C>A	ENST00000311936.3:c.35G>T	0.18		243	1085		509	9	45327		Pathogenic			65	AO	AO	26.3	OW	8.9	0	Weight loss; bloating; change in bowel habits; BRBPR; rectal pain; fatigue	0.0215	IMPACT410	0	0		MSS
Colorectal Cancer (MSK, JNCI 2021)	P-0007645-T01-IM5	Colorectal Cancer	Rectal Adenocarcinoma	KRAS	G12V	OncoKB: Oncogenic, level_3b, level_r1;CIViC: diagnosticCount: 0, predictiveCount: 32, prognosticCount: 1, predisposingCount: 0, oncogenicCount: 0, functionalCount: 0;MyCancerGenome: present;CancerHotspot: yes;3DHotspot: yes			MutationAssessor: impact: low, score: 1.84;SIFT: impact: deleterious, score: 0;Polyphen-2: impact: probably_damaging, score: 0.972	Missense_Mutation	SNP	Diploid	25876	SOMATIC	Unknown	MSKCC	12	25398284	25398284	C	A	12:g.25398284C>A	ENST00000311936.3:c.35G>T	0.46		124	145		362	6	45327		Pathogenic			84	AO	AO	38.4	OB	5.9	1	found incidentally	0.4586	IMPACT410	0	0		MSS
Colorectal Cancer (MSK, JNCI 2021)	P-0007683-T01-IM5	Colorectal Cancer	Colorectal Adenocarcinoma	KRAS	G12V	OncoKB: Oncogenic, level_3b, level_r1;CIViC: diagnosticCount: 0, predictiveCount: 32, prognosticCount: 1, predisposingCount: 0, oncogenicCount: 0, functionalCount: 0;MyCancerGenome: present;CancerHotspot: yes;3DHotspot: yes			MutationAssessor: impact: low, score: 1.84;SIFT: impact: deleterious, score: 0;Polyphen-2: impact: probably_damaging, score: 0.972	Missense_Mutation	SNP	Diploid	25876	SOMATIC	Unknown	MSKCC	12	25398284	25398284	C	A	12:g.25398284C>A	ENST00000311936.3:c.35G>T	0.24		117	376		364	4	45327		Pathogenic			54	AO	AO	23.6	NW	3.9	0	Abdominal pain; BRBPR	0.1261	IMPACT410	0	1		MSS
Colorectal Cancer (MSK, JNCI 2021)	P-0008429-T02-IM5	Colorectal Cancer	Colon Adenocarcinoma	KRAS	G12V	OncoKB: Oncogenic, level_3b, level_r1;CIViC: diagnosticCount: 0, predictiveCount: 32, prognosticCount: 1, predisposingCount: 0, oncogenicCount: 0, functionalCount: 0;MyCancerGenome: present;CancerHotspot: yes;3DHotspot: yes			MutationAssessor: impact: low, score: 1.84;SIFT: impact: deleterious, score: 0;Polyphen-2: impact: probably_damaging, score: 0.972	Missense_Mutation	SNP	Diploid	25876	SOMATIC	Unknown	MSKCC	12	25398284	25398284	C	A	12:g.25398284C>A	ENST00000311936.3:c.35G>T	0.21		188	712		448	6	45327		Pathogenic			61	AO	AO	29.1	OW	5.9	1	BRBPR; Other: Hemoptysis	0.1937	IMPACT410	1	1		MSS
Colorectal Cancer (MSK, JNCI 2021)	P-0008582-T01-IM5	Colorectal Cancer	Colon Adenocarcinoma	KRAS	G12V	OncoKB: Oncogenic, level_3b, level_r1;CIViC: diagnosticCount: 0, predictiveCount: 32, prognosticCount: 1, predisposingCount: 0, oncogenicCount: 0, functionalCount: 0;MyCancerGenome: present;CancerHotspot: yes;3DHotspot: yes			MutationAssessor: impact: low, score: 1.84;SIFT: impact: deleterious, score: 0;Polyphen-2: impact: probably_damaging, score: 0.972	Missense_Mutation	SNP	Diploid	25876	SOMATIC	Unknown	MSKCC	12	25398284	25398284	C	A	12:g.25398284C>A	ENST00000311936.3:c.35G>T	0.11		77	647		499	6	45327		Pathogenic			56	AO	AO	49.4	OB	5.9	0	ANEMIA; fatigue	0.0214	IMPACT410	0	1		MSS
Colorectal Cancer (MSK, JNCI 2021)	P-0009167-T01-IM5	Colorectal Cancer	Colon Adenocarcinoma	KRAS	G12V	OncoKB: Oncogenic, level_3b, level_r1;CIViC: diagnosticCount: 0, predictiveCount: 32, prognosticCount: 1, predisposingCount: 0, oncogenicCount: 0, functionalCount: 0;MyCancerGenome: present;CancerHotspot: yes;3DHotspot: yes			MutationAssessor: impact: low, score: 1.84;SIFT: impact: deleterious, score: 0;Polyphen-2: impact: probably_damaging, score: 0.972	Missense_Mutation	SNP	Diploid	25876	SOMATIC	Unknown	MSKCC	12	25398284	25398284	C	A	12:g.25398284C>A	ENST00000311936.3:c.35G>T	0.13	0.0027	61	419	1	372	5	45327		Pathogenic			54	AO	AO	19.3	NW	4.9	0	incidentally found on colonoscopy	0.0393	IMPACT410	0	0		MSS
Colorectal Cancer (MSK, JNCI 2021)	P-0009433-T01-IM5	Colorectal Cancer	Colon Adenocarcinoma	KRAS	G12V	OncoKB: Oncogenic, level_3b, level_r1;CIViC: diagnosticCount: 0, predictiveCount: 32, prognosticCount: 1, predisposingCount: 0, oncogenicCount: 0, functionalCount: 0;MyCancerGenome: present;CancerHotspot: yes;3DHotspot: yes			MutationAssessor: impact: low, score: 1.84;SIFT: impact: deleterious, score: 0;Polyphen-2: impact: probably_damaging, score: 0.972	Missense_Mutation	SNP	Diploid	25876	SOMATIC	Unknown	MSKCC	12	25398284	25398284	C	A	12:g.25398284C>A	ENST00000311936.3:c.35G>T	0.39		176	277		202	6	45327		Pathogenic			47	EO	Over_35	26.1	OW	5.9	0	OBSTRUCTION	0.3588	IMPACT410	0	1		MSS
Colorectal Cancer (MSK, JNCI 2021)	P-0010330-T01-IM5	Colorectal Cancer	Rectal Adenocarcinoma	KRAS	G12V	OncoKB: Oncogenic, level_3b, level_r1;CIViC: diagnosticCount: 0, predictiveCount: 32, prognosticCount: 1, predisposingCount: 0, oncogenicCount: 0, functionalCount: 0;MyCancerGenome: present;CancerHotspot: yes;3DHotspot: yes			MutationAssessor: impact: low, score: 1.84;SIFT: impact: deleterious, score: 0;Polyphen-2: impact: probably_damaging, score: 0.972	Missense_Mutation	SNP	Diploid	25876	SOMATIC	Unknown	MSKCC	12	25398284	25398284	C	A	12:g.25398284C>A	ENST00000311936.3:c.35G>T	0.22		103	372		338	10	45327		Pathogenic			74	AO	AO	24.8	NW	9.8	0	Anemia	0.026	IMPACT410	0	1		MSS
Colorectal Cancer (MSK, JNCI 2021)	P-0010363-T01-IM5	Colorectal Cancer	Colon Adenocarcinoma	KRAS	G12V	OncoKB: Oncogenic, level_3b, level_r1;CIViC: diagnosticCount: 0, predictiveCount: 32, prognosticCount: 1, predisposingCount: 0, oncogenicCount: 0, functionalCount: 0;MyCancerGenome: present;CancerHotspot: yes;3DHotspot: yes			MutationAssessor: impact: low, score: 1.84;SIFT: impact: deleterious, score: 0;Polyphen-2: impact: probably_damaging, score: 0.972	Missense_Mutation	SNP	Diploid	25876	SOMATIC	Unknown	MSKCC	12	25398284	25398284	C	A	12:g.25398284C>A	ENST00000311936.3:c.35G>T	0.11		63	485		208	6	45327		Pathogenic			64	AO	AO	26.7	OW	5.9	0	bowel obstruction	0.0267	IMPACT410	0	1		MSS
Colorectal Cancer (MSK, JNCI 2021)	P-0010428-T01-IM5	Colorectal Cancer	Colon Adenocarcinoma	KRAS	G12V	OncoKB: Oncogenic, level_3b, level_r1;CIViC: diagnosticCount: 0, predictiveCount: 32, prognosticCount: 1, predisposingCount: 0, oncogenicCount: 0, functionalCount: 0;MyCancerGenome: present;CancerHotspot: yes;3DHotspot: yes			MutationAssessor: impact: low, score: 1.84;SIFT: impact: deleterious, score: 0;Polyphen-2: impact: probably_damaging, score: 0.972	Missense_Mutation	SNP	Diploid	25876	SOMATIC	Unknown	MSKCC	12	25398284	25398284	C	A	12:g.25398284C>A	ENST00000311936.3:c.35G>T	0.19	0.0025	96	403	1	405	6	45327		Pathogenic			65	AO	AO	51.2	OB	5.9	0	epigastric abdominal pain, diarrhea	0.1421	IMPACT410	1	1		MSS
Colorectal Cancer (MSK, JNCI 2021)	P-0010432-T01-IM5	Colorectal Cancer	Rectal Adenocarcinoma	KRAS	G12V	OncoKB: Oncogenic, level_3b, level_r1;CIViC: diagnosticCount: 0, predictiveCount: 32, prognosticCount: 1, predisposingCount: 0, oncogenicCount: 0, functionalCount: 0;MyCancerGenome: present;CancerHotspot: yes;3DHotspot: yes			MutationAssessor: impact: low, score: 1.84;SIFT: impact: deleterious, score: 0;Polyphen-2: impact: probably_damaging, score: 0.972	Missense_Mutation	SNP	Diploid	25876	SOMATIC	Unknown	MSKCC	12	25398284	25398284	C	A	12:g.25398284C>A	ENST00000311936.3:c.35G>T	0.05		23	459		329	6	45327		Pathogenic			48	EO	Over_35	24.7	NW	5.9	0	ANEMIA; FATIGUE	0.0006	IMPACT410	0			MSS
Colorectal Cancer (MSK, JNCI 2021)	P-0010861-T01-IM5	Colorectal Cancer	Rectal Adenocarcinoma	KRAS	G12V	OncoKB: Oncogenic, level_3b, level_r1;CIViC: diagnosticCount: 0, predictiveCount: 32, prognosticCount: 1, predisposingCount: 0, oncogenicCount: 0, functionalCount: 0;MyCancerGenome: present;CancerHotspot: yes;3DHotspot: yes			MutationAssessor: impact: low, score: 1.84;SIFT: impact: deleterious, score: 0;Polyphen-2: impact: probably_damaging, score: 0.972	Missense_Mutation	SNP	Diploid	25876	SOMATIC	Unknown	MSKCC	12	25398284	25398284	C	A	12:g.25398284C>A	ENST00000311936.3:c.35G>T	0.2		178	708		550	11	45327		Pathogenic			38	EO	Over_35	19.4	NW	10.8	0	CHANGE IN BOWEL HABITS; BRBPR; RECTAL PAIN	0.051	IMPACT410	0			MSS
Colorectal Cancer (MSK, JNCI 2021)	P-0011144-T01-IM5	Colorectal Cancer	Colon Adenocarcinoma	KRAS	G12V	OncoKB: Oncogenic, level_3b, level_r1;CIViC: diagnosticCount: 0, predictiveCount: 32, prognosticCount: 1, predisposingCount: 0, oncogenicCount: 0, functionalCount: 0;MyCancerGenome: present;CancerHotspot: yes;3DHotspot: yes			MutationAssessor: impact: low, score: 1.84;SIFT: impact: deleterious, score: 0;Polyphen-2: impact: probably_damaging, score: 0.972	Missense_Mutation	SNP	Diploid	25876	SOMATIC	Unknown	MSKCC	12	25398284	25398284	C	A	12:g.25398284C>A	ENST00000311936.3:c.35G>T	0.07	0.0029	59	804	1	342	5	45327		Pathogenic			25	EO	Under_35	27.2	OW	4.9	0	UPPER GI SX	0.0169	IMPACT410	0	1		MSS
Colorectal Cancer (MSK, JNCI 2021)	P-0011366-T01-IM5	Colorectal Cancer	Colon Adenocarcinoma	KRAS	G12V	OncoKB: Oncogenic, level_3b, level_r1;CIViC: diagnosticCount: 0, predictiveCount: 32, prognosticCount: 1, predisposingCount: 0, oncogenicCount: 0, functionalCount: 0;MyCancerGenome: present;CancerHotspot: yes;3DHotspot: yes			MutationAssessor: impact: low, score: 1.84;SIFT: impact: deleterious, score: 0;Polyphen-2: impact: probably_damaging, score: 0.972	Missense_Mutation	SNP	Diploid	25876	SOMATIC	Unknown	MSKCC	12	25398284	25398284	C	A	12:g.25398284C>A	ENST00000311936.3:c.35G>T	0.33		426	872		349	13	45327		Pathogenic			63	AO	AO	17.9	UW	12.8	0	anemia	0.1515	IMPACT410	0	0		MSS
Colorectal Cancer (MSK, JNCI 2021)	P-0012781-T01-IM5	Colorectal Cancer	Colon Adenocarcinoma	KRAS	G12V	OncoKB: Oncogenic, level_3b, level_r1;CIViC: diagnosticCount: 0, predictiveCount: 32, prognosticCount: 1, predisposingCount: 0, oncogenicCount: 0, functionalCount: 0;MyCancerGenome: present;CancerHotspot: yes;3DHotspot: yes			MutationAssessor: impact: low, score: 1.84;SIFT: impact: deleterious, score: 0;Polyphen-2: impact: probably_damaging, score: 0.972	Missense_Mutation	SNP	Diploid	25876	SOMATIC	Unknown	MSKCC	12	25398284	25398284	C	A	12:g.25398284C>A	ENST00000311936.3:c.35G>T	0.17		160	779		397	4	45327		Pathogenic			39	EO	Over_35	29.1	OW	3.9	0	ABDOMINAL PAIN, BLOATING/ABDOMINAL GIRTH/PELVIC PRESSURE,PAIN	0.049	IMPACT410	0	0		MSS
Colorectal Cancer (MSK, JNCI 2021)	P-0012912-T01-IM5	Colorectal Cancer	Colon Adenocarcinoma	KRAS	G12V	OncoKB: Oncogenic, level_3b, level_r1;CIViC: diagnosticCount: 0, predictiveCount: 32, prognosticCount: 1, predisposingCount: 0, oncogenicCount: 0, functionalCount: 0;MyCancerGenome: present;CancerHotspot: yes;3DHotspot: yes			MutationAssessor: impact: low, score: 1.84;SIFT: impact: deleterious, score: 0;Polyphen-2: impact: probably_damaging, score: 0.972	Missense_Mutation	SNP	Diploid	25876	SOMATIC	Unknown	MSKCC	12	25398284	25398284	C	A	12:g.25398284C>A	ENST00000311936.3:c.35G>T	0.28		265	682		473	9	45327		Pathogenic			63	AO	AO	25.2	OW	8.9	0	weight loss, constipation	0.0005	IMPACT410	0	0		MSS
Colorectal Cancer (MSK, JNCI 2021)	P-0013055-T01-IM5	Colorectal Cancer	Colon Adenocarcinoma	KRAS	G12V	OncoKB: Oncogenic, level_3b, level_r1;CIViC: diagnosticCount: 0, predictiveCount: 32, prognosticCount: 1, predisposingCount: 0, oncogenicCount: 0, functionalCount: 0;MyCancerGenome: present;CancerHotspot: yes;3DHotspot: yes			MutationAssessor: impact: low, score: 1.84;SIFT: impact: deleterious, score: 0;Polyphen-2: impact: probably_damaging, score: 0.972	Missense_Mutation	SNP	Diploid	25876	SOMATIC	Unknown	MSKCC	12	25398284	25398284	C	A	12:g.25398284C>A	ENST00000311936.3:c.35G>T	0.44		456	577		609	10	45327		Pathogenic			49	EO	Over_35	27.3	OW	9.8	0	ABDOMINAL PAIN, BLOATING/ABDOMINAL GIRTH/PELVIC PRESSURE,PAIN	0.1827	IMPACT410	0	1		MSS
Colorectal Cancer (MSK, JNCI 2021)	P-0013300-T01-IM5	Colorectal Cancer	Colon Adenocarcinoma	KRAS	G12V	OncoKB: Oncogenic, level_3b, level_r1;CIViC: diagnosticCount: 0, predictiveCount: 32, prognosticCount: 1, predisposingCount: 0, oncogenicCount: 0, functionalCount: 0;MyCancerGenome: present;CancerHotspot: yes;3DHotspot: yes			MutationAssessor: impact: low, score: 1.84;SIFT: impact: deleterious, score: 0;Polyphen-2: impact: probably_damaging, score: 0.972	Missense_Mutation	SNP	Diploid	25876	SOMATIC	Unknown	MSKCC	12	25398284	25398284	C	A	12:g.25398284C>A	ENST00000311936.3:c.35G>T	0.21		143	525		615	5	45327		Pathogenic			43	EO	Over_35	38.6	OB	4.9	0	FATIGUE	0.1683	IMPACT410	0	0		MSS
Colorectal Cancer (MSK, JNCI 2021)	P-0013395-T01-IM5	Colorectal Cancer	Colon Adenocarcinoma	KRAS	G12V	OncoKB: Oncogenic, level_3b, level_r1;CIViC: diagnosticCount: 0, predictiveCount: 32, prognosticCount: 1, predisposingCount: 0, oncogenicCount: 0, functionalCount: 0;MyCancerGenome: present;CancerHotspot: yes;3DHotspot: yes			MutationAssessor: impact: low, score: 1.84;SIFT: impact: deleterious, score: 0;Polyphen-2: impact: probably_damaging, score: 0.972	Missense_Mutation	SNP	Diploid	25876	SOMATIC	Unknown	MSKCC	12	25398284	25398284	C	A	12:g.25398284C>A	ENST00000311936.3:c.35G>T	0.24		220	693		543	6	45327		Pathogenic			73	AO	AO	35.4	OB	5.9	0	BRBPR	0.0595	IMPACT410	0	0		MSS
Colorectal Cancer (MSK, JNCI 2021)	P-0013400-T01-IM5	Colorectal Cancer	Colon Adenocarcinoma	KRAS	G12V	OncoKB: Oncogenic, level_3b, level_r1;CIViC: diagnosticCount: 0, predictiveCount: 32, prognosticCount: 1, predisposingCount: 0, oncogenicCount: 0, functionalCount: 0;MyCancerGenome: present;CancerHotspot: yes;3DHotspot: yes			MutationAssessor: impact: low, score: 1.84;SIFT: impact: deleterious, score: 0;Polyphen-2: impact: probably_damaging, score: 0.972	Missense_Mutation	SNP	Diploid	25876	SOMATIC	Unknown	MSKCC	12	25398284	25398284	C	A	12:g.25398284C>A	ENST00000311936.3:c.35G>T	0.24		219	706		528	64	45327		Pathogenic			43	EO	Over_35	21	NW	63	0	ABDOMINAL PAIN, BLOATING/ABDOMINAL GIRTH/PELVIC PRESSURE,PAIN; BRBPR	0.0053	IMPACT410	0
Colorectal Cancer (MSK, JNCI 2021)	P-0013704-T01-IM5	Colorectal Cancer	Rectal Adenocarcinoma	KRAS	G12V	OncoKB: Oncogenic, level_3b, level_r1;CIViC: diagnosticCount: 0, predictiveCount: 32, prognosticCount: 1, predisposingCount: 0, oncogenicCount: 0, functionalCount: 0;MyCancerGenome: present;CancerHotspot: yes;3DHotspot: yes			MutationAssessor: impact: low, score: 1.84;SIFT: impact: deleterious, score: 0;Polyphen-2: impact: probably_damaging, score: 0.972	Missense_Mutation	SNP	Diploid	25876	SOMATIC	Unknown	MSKCC	12	25398284	25398284	C	A	12:g.25398284C>A	ENST00000311936.3:c.35G>T	0.31		210	468		346	12	45327		Pathogenic			71	AO	AO	25	OW	11.8	0	change in bowel habits, change in stool caliber, nonspecific abdominal discomfort	0.1339	IMPACT410	1	0		MSS
Colorectal Cancer (MSK, JNCI 2021)	P-0013907-T01-IM5	Colorectal Cancer	Rectal Adenocarcinoma	KRAS	G12V	OncoKB: Oncogenic, level_3b, level_r1;CIViC: diagnosticCount: 0, predictiveCount: 32, prognosticCount: 1, predisposingCount: 0, oncogenicCount: 0, functionalCount: 0;MyCancerGenome: present;CancerHotspot: yes;3DHotspot: yes			MutationAssessor: impact: low, score: 1.84;SIFT: impact: deleterious, score: 0;Polyphen-2: impact: probably_damaging, score: 0.972	Missense_Mutation	SNP	Diploid	25876	SOMATIC	Unknown	MSKCC	12	25398284	25398284	C	A	12:g.25398284C>A	ENST00000311936.3:c.35G>T	0.23		201	691		475	7	45327		Pathogenic			65	AO	AO	21.3	NW	6.9	0	change in stool caliber and size, right sided abdominal pain, anemia	0.0395	IMPACT410	1			MSS
Colorectal Cancer (MSK, JNCI 2021)	P-0013941-T01-IM5	Colorectal Cancer	Colon Adenocarcinoma	KRAS	G12V	OncoKB: Oncogenic, level_3b, level_r1;CIViC: diagnosticCount: 0, predictiveCount: 32, prognosticCount: 1, predisposingCount: 0, oncogenicCount: 0, functionalCount: 0;MyCancerGenome: present;CancerHotspot: yes;3DHotspot: yes			MutationAssessor: impact: low, score: 1.84;SIFT: impact: deleterious, score: 0;Polyphen-2: impact: probably_damaging, score: 0.972	Missense_Mutation	SNP	Diploid	25876	SOMATIC	Unknown	MSKCC	12	25398284	25398284	C	A	12:g.25398284C>A	ENST00000311936.3:c.35G>T	0.2		205	842		633	10	45327		Pathogenic			51	AO	AO	32.8	OB	9.8	0	blood in stool, guaiac in stool	0.0259	IMPACT410	1	0		MSS
Colorectal Cancer (MSK, JNCI 2021)	P-0014042-T01-IM5	Colorectal Cancer	Mucinous Adenocarcinoma of the Colon and Rectum	KRAS	G12V	OncoKB: Oncogenic, level_3b, level_r1;CIViC: diagnosticCount: 0, predictiveCount: 32, prognosticCount: 1, predisposingCount: 0, oncogenicCount: 0, functionalCount: 0;MyCancerGenome: present;CancerHotspot: yes;3DHotspot: yes			MutationAssessor: impact: low, score: 1.84;SIFT: impact: deleterious, score: 0;Polyphen-2: impact: probably_damaging, score: 0.972	Missense_Mutation	SNP	Diploid	25876	SOMATIC	Unknown	MSKCC	12	25398284	25398284	C	A	12:g.25398284C>A	ENST00000311936.3:c.35G>T	0.22		112	399		461	7	45327		Pathogenic			78	AO	AO	34.5	OB	6.9	0	BRBPR	0.0759	IMPACT410	0	0		MSS
Colorectal Cancer (MSK, JNCI 2021)	P-0014195-T01-IM6	Colorectal Cancer	Colon Adenocarcinoma	KRAS	G12V	OncoKB: Oncogenic, level_3b, level_r1;CIViC: diagnosticCount: 0, predictiveCount: 32, prognosticCount: 1, predisposingCount: 0, oncogenicCount: 0, functionalCount: 0;MyCancerGenome: present;CancerHotspot: yes;3DHotspot: yes			MutationAssessor: impact: low, score: 1.84;SIFT: impact: deleterious, score: 0;Polyphen-2: impact: probably_damaging, score: 0.972	Missense_Mutation	SNP	Diploid	25876	SOMATIC	Unknown	MSKCC	12	25398284	25398284	C	A	12:g.25398284C>A	ENST00000311936.3:c.35G>T	0.18		153	685		440	6	45327		Pathogenic			35	EO	Under_35	37.2	OB	5.3	0	ABDOMINAL PAIN, BLOATING/ABDOMINAL GIRTH/PELVIC PRESSURE,PAIN	0.0464	IMPACT468	0	0		MSS
Colorectal Cancer (MSK, JNCI 2021)	P-0015298-T02-IM6	Colorectal Cancer	Colon Adenocarcinoma	KRAS	G12V	OncoKB: Oncogenic, level_3b, level_r1;CIViC: diagnosticCount: 0, predictiveCount: 32, prognosticCount: 1, predisposingCount: 0, oncogenicCount: 0, functionalCount: 0;MyCancerGenome: present;CancerHotspot: yes;3DHotspot: yes			MutationAssessor: impact: low, score: 1.84;SIFT: impact: deleterious, score: 0;Polyphen-2: impact: probably_damaging, score: 0.972	Missense_Mutation	SNP	Diploid	25876	SOMATIC	Unknown	MSKCC	12	25398284	25398284	C	A	12:g.25398284C>A	ENST00000311936.3:c.35G>T	0.21		163	628		482	12	45327		Pathogenic			29	EO	Under_35	34.4	OB	10.5	0	ABDOMINAL PAIN, BLOATING/ABDOMINAL GIRTH/PELVIC PRESSURE,PAIN	0.2239	IMPACT468	0	1		MSS
Colorectal Cancer (MSK, JNCI 2021)	P-0015781-T01-IM6	Colorectal Cancer	Colon Adenocarcinoma	KRAS	G12V	OncoKB: Oncogenic, level_3b, level_r1;CIViC: diagnosticCount: 0, predictiveCount: 32, prognosticCount: 1, predisposingCount: 0, oncogenicCount: 0, functionalCount: 0;MyCancerGenome: present;CancerHotspot: yes;3DHotspot: yes			MutationAssessor: impact: low, score: 1.84;SIFT: impact: deleterious, score: 0;Polyphen-2: impact: probably_damaging, score: 0.972	Missense_Mutation	SNP	Diploid	25876	SOMATIC	Unknown	MSKCC	12	25398284	25398284	C	A	12:g.25398284C>A	ENST00000311936.3:c.35G>T	0.27		188	502		552	4	45327		Pathogenic			40	EO	Over_35	29	OW	3.5	0	BRBPR	0.4128	IMPACT468	1	1		MSS
Colorectal Cancer (MSK, JNCI 2021)	P-0019267-T01-IM6	Colorectal Cancer	Colon Adenocarcinoma	KRAS	G12V	OncoKB: Oncogenic, level_3b, level_r1;CIViC: diagnosticCount: 0, predictiveCount: 32, prognosticCount: 1, predisposingCount: 0, oncogenicCount: 0, functionalCount: 0;MyCancerGenome: present;CancerHotspot: yes;3DHotspot: yes			MutationAssessor: impact: low, score: 1.84;SIFT: impact: deleterious, score: 0;Polyphen-2: impact: probably_damaging, score: 0.972	Missense_Mutation	SNP	Diploid	25876	SOMATIC	Unknown	MSKCC	12	25398284	25398284	C	A	12:g.25398284C>A	ENST00000311936.3:c.35G>T	0.23		156	513		748	6	45327		Pathogenic			49	EO	Over_35	32.4	OB	5.3	0	BRBPR; CHANGE IN BOWEL HABITS	0.1513	IMPACT468	0			MSS
Colorectal Cancer (MSK, JNCI 2021)	P-0020636-T01-IM6	Colorectal Cancer	Colorectal Adenocarcinoma	KRAS	G12V	OncoKB: Oncogenic, level_3b, level_r1;CIViC: diagnosticCount: 0, predictiveCount: 32, prognosticCount: 1, predisposingCount: 0, oncogenicCount: 0, functionalCount: 0;MyCancerGenome: present;CancerHotspot: yes;3DHotspot: yes			MutationAssessor: impact: low, score: 1.84;SIFT: impact: deleterious, score: 0;Polyphen-2: impact: probably_damaging, score: 0.972	Missense_Mutation	SNP	Diploid	25876	SOMATIC	Unknown	MSKCC	12	25398284	25398284	C	A	12:g.25398284C>A	ENST00000311936.3:c.35G>T	0.18		146	683		792	5	45327		Pathogenic			40	EO	Over_35	28	OW	4.4	0	BRBPR	0.1621	IMPACT468	1	0		MSS
Colorectal Cancer (MSK, JNCI 2021)	P-0020642-T01-IM6	Colorectal Cancer	Colon Adenocarcinoma	KRAS	G12V	OncoKB: Oncogenic, level_3b, level_r1;CIViC: diagnosticCount: 0, predictiveCount: 32, prognosticCount: 1, predisposingCount: 0, oncogenicCount: 0, functionalCount: 0;MyCancerGenome: present;CancerHotspot: yes;3DHotspot: yes			MutationAssessor: impact: low, score: 1.84;SIFT: impact: deleterious, score: 0;Polyphen-2: impact: probably_damaging, score: 0.972	Missense_Mutation	SNP	Diploid	25876	SOMATIC	Unknown	MSKCC	12	25398284	25398284	C	A	12:g.25398284C>A	ENST00000311936.3:c.35G>T	0.2		230	911		644	6	45327		Pathogenic			43	EO	Over_35	22.9	NW	5.3	0	ABDOMINAL PAIN, BLOATING/ABDOMINAL GIRTH/PELVIC PRESSURE,PAIN	0.1896	IMPACT468	0	1		MSS
Colorectal Cancer (MSK, JNCI 2021)	P-0021153-T01-IM6	Colorectal Cancer	Colon Adenocarcinoma	KRAS	G12V	OncoKB: Oncogenic, level_3b, level_r1;CIViC: diagnosticCount: 0, predictiveCount: 32, prognosticCount: 1, predisposingCount: 0, oncogenicCount: 0, functionalCount: 0;MyCancerGenome: present;CancerHotspot: yes;3DHotspot: yes			MutationAssessor: impact: low, score: 1.84;SIFT: impact: deleterious, score: 0;Polyphen-2: impact: probably_damaging, score: 0.972	Missense_Mutation	SNP	Diploid	25876	SOMATIC	Unknown	MSKCC	12	25398284	25398284	C	A	12:g.25398284C>A	ENST00000311936.3:c.35G>T	0.31		238	536		811	10	45327		Pathogenic			49	EO	Over_35	24.1	NW	8.8	1	ANEMIA; WEIGHT LOSS	0.1863	IMPACT468	0			MSS
Colorectal Cancer (MSK, JNCI 2021)	P-0023128-T01-IM6	Colorectal Cancer	Rectal Adenocarcinoma	KRAS	G12V	OncoKB: Oncogenic, level_3b, level_r1;CIViC: diagnosticCount: 0, predictiveCount: 32, prognosticCount: 1, predisposingCount: 0, oncogenicCount: 0, functionalCount: 0;MyCancerGenome: present;CancerHotspot: yes;3DHotspot: yes			MutationAssessor: impact: low, score: 1.84;SIFT: impact: deleterious, score: 0;Polyphen-2: impact: probably_damaging, score: 0.972	Missense_Mutation	SNP	Diploid	25876	SOMATIC	Unknown	MSKCC	12	25398284	25398284	C	A	12:g.25398284C>A	ENST00000311936.3:c.35G>T	0.27		224	603		790	14	45327		Pathogenic			39	EO	Over_35	29.2	OW	12.3	0	CHANGE IN BOWEL HABITS	0.1665	IMPACT468	0	1		MSS
Colorectal Cancer (MSK, JNCI 2021)	P-0024513-T01-IM6	Colorectal Cancer	Rectal Adenocarcinoma	KRAS	G12V	OncoKB: Oncogenic, level_3b, level_r1;CIViC: diagnosticCount: 0, predictiveCount: 32, prognosticCount: 1, predisposingCount: 0, oncogenicCount: 0, functionalCount: 0;MyCancerGenome: present;CancerHotspot: yes;3DHotspot: yes			MutationAssessor: impact: low, score: 1.84;SIFT: impact: deleterious, score: 0;Polyphen-2: impact: probably_damaging, score: 0.972	Missense_Mutation	SNP	Diploid	25876	SOMATIC	Unknown	MSKCC	12	25398284	25398284	C	A	12:g.25398284C>A	ENST00000311936.3:c.35G>T	0.09		44	451		614	6	45327		Pathogenic			39	EO	Over_35	21.2	NW	5.3	0	BRBPR	0.0295	IMPACT468	0	1		MSS
Colorectal Cancer (MSK, JNCI 2021)	P-0025047-T01-IM6	Colorectal Cancer	Colon Adenocarcinoma	KRAS	G12V	OncoKB: Oncogenic, level_3b, level_r1;CIViC: diagnosticCount: 0, predictiveCount: 32, prognosticCount: 1, predisposingCount: 0, oncogenicCount: 0, functionalCount: 0;MyCancerGenome: present;CancerHotspot: yes;3DHotspot: yes			MutationAssessor: impact: low, score: 1.84;SIFT: impact: deleterious, score: 0;Polyphen-2: impact: probably_damaging, score: 0.972	Missense_Mutation	SNP	Diploid	25876	SOMATIC	Unknown	MSKCC	12	25398284	25398284	C	A	12:g.25398284C>A	ENST00000311936.3:c.35G>T	0.31		151	334		505	85	45327		Pathogenic			49	EO	Over_35	30.1	OB	74.6	0	ABDOMINAL PAIN, BLOATING/ABDOMINAL GIRTH/PELVIC PRESSURE,PAIN	0	IMPACT468	0			MSI
Colorectal Cancer (MSK, JNCI 2021)	P-0025161-T01-IM6	Colorectal Cancer	Colorectal Adenocarcinoma	KRAS	G12V	OncoKB: Oncogenic, level_3b, level_r1;CIViC: diagnosticCount: 0, predictiveCount: 32, prognosticCount: 1, predisposingCount: 0, oncogenicCount: 0, functionalCount: 0;MyCancerGenome: present;CancerHotspot: yes;3DHotspot: yes			MutationAssessor: impact: low, score: 1.84;SIFT: impact: deleterious, score: 0;Polyphen-2: impact: probably_damaging, score: 0.972	Missense_Mutation	SNP	Diploid	25876	SOMATIC	Unknown	MSKCC	12	25398284	25398284	C	A	12:g.25398284C>A	ENST00000311936.3:c.35G>T	0.03		28	780		624	11	45327		Pathogenic			40	EO	Over_35	25.8	OW	9.7	0	ABDOMINAL PAIN, BLOATING/ABDOMINAL GIRTH/PELVIC PRESSURE,PAIN; WEIGHT LOSS	0.1644	IMPACT468	0	1		MSS
Colorectal Cancer (MSK, JNCI 2021)	P-0026016-T02-IM6	Colorectal Cancer	Rectal Adenocarcinoma	KRAS	G12V	OncoKB: Oncogenic, level_3b, level_r1;CIViC: diagnosticCount: 0, predictiveCount: 32, prognosticCount: 1, predisposingCount: 0, oncogenicCount: 0, functionalCount: 0;MyCancerGenome: present;CancerHotspot: yes;3DHotspot: yes			MutationAssessor: impact: low, score: 1.84;SIFT: impact: deleterious, score: 0;Polyphen-2: impact: probably_damaging, score: 0.972	Missense_Mutation	SNP	Diploid	25876	SOMATIC	Unknown	MSKCC	12	25398284	25398284	C	A	12:g.25398284C>A	ENST00000311936.3:c.35G>T	0.06	0.0017	34	562	1	583	3	45327		Pathogenic			49	EO	Over_35	56.2	OB	2.6	0		0	IMPACT468	1	0		MSS
Colorectal Cancer (MSK, JNCI 2021)	P-0026867-T01-IM6	Colorectal Cancer	Colon Adenocarcinoma	KRAS	G12V	OncoKB: Oncogenic, level_3b, level_r1;CIViC: diagnosticCount: 0, predictiveCount: 32, prognosticCount: 1, predisposingCount: 0, oncogenicCount: 0, functionalCount: 0;MyCancerGenome: present;CancerHotspot: yes;3DHotspot: yes			MutationAssessor: impact: low, score: 1.84;SIFT: impact: deleterious, score: 0;Polyphen-2: impact: probably_damaging, score: 0.972	Missense_Mutation	SNP	Diploid	25876	SOMATIC	Unknown	MSKCC	12	25398284	25398284	C	A	12:g.25398284C>A	ENST00000311936.3:c.35G>T	0.28	0.0049	200	507	2	409	5	45327		Pathogenic			26	EO	Under_35	20.7	NW	4.4	0	WEIGHT LOSS	0.2128	IMPACT468	0	1		MSS
Colorectal Cancer (MSK, JNCI 2021)	P-0027324-T01-IM6	Colorectal Cancer	Colon Adenocarcinoma	KRAS	G12V	OncoKB: Oncogenic, level_3b, level_r1;CIViC: diagnosticCount: 0, predictiveCount: 32, prognosticCount: 1, predisposingCount: 0, oncogenicCount: 0, functionalCount: 0;MyCancerGenome: present;CancerHotspot: yes;3DHotspot: yes			MutationAssessor: impact: low, score: 1.84;SIFT: impact: deleterious, score: 0;Polyphen-2: impact: probably_damaging, score: 0.972	Missense_Mutation	SNP	Diploid	25876	SOMATIC	Unknown	MSKCC	12	25398284	25398284	C	A	12:g.25398284C>A	ENST00000311936.3:c.35G>T	0.15		65	372		298	76	45327		Pathogenic			32	EO	Under_35			66.7			0.008	IMPACT468
Colorectal Cancer (MSK, JNCI 2021)	P-0030293-T01-IM6	Colorectal Cancer	Colon Adenocarcinoma	KRAS	G12V	OncoKB: Oncogenic, level_3b, level_r1;CIViC: diagnosticCount: 0, predictiveCount: 32, prognosticCount: 1, predisposingCount: 0, oncogenicCount: 0, functionalCount: 0;MyCancerGenome: present;CancerHotspot: yes;3DHotspot: yes			MutationAssessor: impact: low, score: 1.84;SIFT: impact: deleterious, score: 0;Polyphen-2: impact: probably_damaging, score: 0.972	Missense_Mutation	SNP	Diploid	25876	SOMATIC	Unknown	MSKCC	12	25398284	25398284	C	A	12:g.25398284C>A	ENST00000311936.3:c.35G>T	0.29		179	442		569	6	45327		Pathogenic			41	EO	Over_35	19.4	NW	5.3	0	BRBPR; CHANGE IN BOWEL HABITS	0.1022	IMPACT468	0	1		MSS
Colorectal Cancer (MSK, JNCI 2021)	P-0030540-T01-IM6	Colorectal Cancer	Rectal Adenocarcinoma	KRAS	G12V	OncoKB: Oncogenic, level_3b, level_r1;CIViC: diagnosticCount: 0, predictiveCount: 32, prognosticCount: 1, predisposingCount: 0, oncogenicCount: 0, functionalCount: 0;MyCancerGenome: present;CancerHotspot: yes;3DHotspot: yes			MutationAssessor: impact: low, score: 1.84;SIFT: impact: deleterious, score: 0;Polyphen-2: impact: probably_damaging, score: 0.972	Missense_Mutation	SNP	Diploid	25876	SOMATIC	Unknown	MSKCC	12	25398284	25398284	C	A	12:g.25398284C>A	ENST00000311936.3:c.35G>T	0.18		110	517		382	7	45327		Pathogenic			29	EO	Under_35	19.5	NW	6.1	0	BRBPR; CHANGE IN BOWEL HABITS	0.0866	IMPACT468	0	0		MSS
Colorectal Cancer (MSK, JNCI 2021)	P-0031052-T01-IM6	Colorectal Cancer	Rectal Adenocarcinoma	KRAS	G12V	OncoKB: Oncogenic, level_3b, level_r1;CIViC: diagnosticCount: 0, predictiveCount: 32, prognosticCount: 1, predisposingCount: 0, oncogenicCount: 0, functionalCount: 0;MyCancerGenome: present;CancerHotspot: yes;3DHotspot: yes			MutationAssessor: impact: low, score: 1.84;SIFT: impact: deleterious, score: 0;Polyphen-2: impact: probably_damaging, score: 0.972	Missense_Mutation	SNP	Diploid	25876	SOMATIC	Unknown	MSKCC	12	25398284	25398284	C	A	12:g.25398284C>A	ENST00000311936.3:c.35G>T	0.33	0.003	129	264	1	330	7	45327		Pathogenic			46	EO	Over_35	21.7	NW	6.1	0	BRBPR	0.2378	IMPACT468	0			MSS
Colorectal Cancer (MSK, JNCI 2021)	P-0032020-T01-IM6	Colorectal Cancer	Colon Adenocarcinoma	KRAS	G12V	OncoKB: Oncogenic, level_3b, level_r1;CIViC: diagnosticCount: 0, predictiveCount: 32, prognosticCount: 1, predisposingCount: 0, oncogenicCount: 0, functionalCount: 0;MyCancerGenome: present;CancerHotspot: yes;3DHotspot: yes			MutationAssessor: impact: low, score: 1.84;SIFT: impact: deleterious, score: 0;Polyphen-2: impact: probably_damaging, score: 0.972	Missense_Mutation	SNP	Diploid	25876	SOMATIC	Unknown	MSKCC	12	25398284	25398284	C	A	12:g.25398284C>A	ENST00000311936.3:c.35G>T	0.21		158	584		437	13	45327		Pathogenic			43	EO	Over_35	25.8	OW	11.4	0	BRBPR	0.0987	IMPACT468	0	0		MSS
Colorectal Cancer (MSK, JNCI 2021)	P-0032287-T01-IM6	Colorectal Cancer	Colon Adenocarcinoma	KRAS	G12V	OncoKB: Oncogenic, level_3b, level_r1;CIViC: diagnosticCount: 0, predictiveCount: 32, prognosticCount: 1, predisposingCount: 0, oncogenicCount: 0, functionalCount: 0;MyCancerGenome: present;CancerHotspot: yes;3DHotspot: yes			MutationAssessor: impact: low, score: 1.84;SIFT: impact: deleterious, score: 0;Polyphen-2: impact: probably_damaging, score: 0.972	Missense_Mutation	SNP	Diploid	25876	SOMATIC	Unknown	MSKCC	12	25398284	25398284	C	A	12:g.25398284C>A	ENST00000311936.3:c.35G>T	0.42		189	264		459	6	45327		Pathogenic			39	EO	Over_35	27.8	OW	5.3	0	ABDOMINAL PAIN, BLOATING/ABDOMINAL GIRTH/PELVIC PRESSURE,PAIN	0.4878	IMPACT468	0	1		MSS
Colorectal Cancer (MSK, JNCI 2021)	P-0032851-T01-IM6	Colorectal Cancer	Colon Adenocarcinoma	KRAS	G12V	OncoKB: Oncogenic, level_3b, level_r1;CIViC: diagnosticCount: 0, predictiveCount: 32, prognosticCount: 1, predisposingCount: 0, oncogenicCount: 0, functionalCount: 0;MyCancerGenome: present;CancerHotspot: yes;3DHotspot: yes			MutationAssessor: impact: low, score: 1.84;SIFT: impact: deleterious, score: 0;Polyphen-2: impact: probably_damaging, score: 0.972	Missense_Mutation	SNP	Diploid	25876	SOMATIC	Unknown	MSKCC	12	25398284	25398284	C	A	12:g.25398284C>A	ENST00000311936.3:c.35G>T	0.11		66	528		497	6	45327		Pathogenic			28	EO	Under_35	21	NW	5.3	0	ABDOMINAL PAIN, BLOATING/ABDOMINAL GIRTH/PELVIC PRESSURE,PAIN; CHANGE IN BOWEL HABITS	0.0452	IMPACT468	0	0		MSS
Colorectal Cancer (MSK, JNCI 2021)	P-0033408-T01-IM6	Colorectal Cancer	Colon Adenocarcinoma	KRAS	G12V	OncoKB: Oncogenic, level_3b, level_r1;CIViC: diagnosticCount: 0, predictiveCount: 32, prognosticCount: 1, predisposingCount: 0, oncogenicCount: 0, functionalCount: 0;MyCancerGenome: present;CancerHotspot: yes;3DHotspot: yes			MutationAssessor: impact: low, score: 1.84;SIFT: impact: deleterious, score: 0;Polyphen-2: impact: probably_damaging, score: 0.972	Missense_Mutation	SNP	Diploid	25876	SOMATIC	Unknown	MSKCC	12	25398284	25398284	C	A	12:g.25398284C>A	ENST00000311936.3:c.35G>T	0.17		68	329		491	5	45327		Pathogenic			48	EO	Over_35	27.9	OW	4.4	0	BRBPR	0.137	IMPACT468	0			MSS
Colorectal Cancer (MSK, JNCI 2021)	P-0033617-T01-IM6	Colorectal Cancer	Rectal Adenocarcinoma	KRAS	G12V	OncoKB: Oncogenic, level_3b, level_r1;CIViC: diagnosticCount: 0, predictiveCount: 32, prognosticCount: 1, predisposingCount: 0, oncogenicCount: 0, functionalCount: 0;MyCancerGenome: present;CancerHotspot: yes;3DHotspot: yes			MutationAssessor: impact: low, score: 1.84;SIFT: impact: deleterious, score: 0;Polyphen-2: impact: probably_damaging, score: 0.972	Missense_Mutation	SNP	Diploid	25876	SOMATIC	Unknown	MSKCC	12	25398284	25398284	C	A	12:g.25398284C>A	ENST00000311936.3:c.35G>T	0.37		285	486		474	7	45327		Pathogenic			41	EO	Over_35	30.5	OB	6.1	0	BRBPR; RECTAL PAIN	0.1907	IMPACT468	0	0		MSS
Colorectal Cancer (MSK, JNCI 2021)	P-0033852-T01-IM6	Colorectal Cancer	Colon Adenocarcinoma	KRAS	G12V	OncoKB: Oncogenic, level_3b, level_r1;CIViC: diagnosticCount: 0, predictiveCount: 32, prognosticCount: 1, predisposingCount: 0, oncogenicCount: 0, functionalCount: 0;MyCancerGenome: present;CancerHotspot: yes;3DHotspot: yes			MutationAssessor: impact: low, score: 1.84;SIFT: impact: deleterious, score: 0;Polyphen-2: impact: probably_damaging, score: 0.972	Missense_Mutation	SNP	Diploid	25876	SOMATIC	Unknown	MSKCC	12	25398284	25398284	C	A	12:g.25398284C>A	ENST00000311936.3:c.35G>T	0.29		88	219		386	44	45327		Pathogenic			39	EO	Over_35			38.6			0.1613	IMPACT468
Colorectal Cancer (MSK, JNCI 2021)	P-0035104-T01-IM6	Colorectal Cancer	Colorectal Adenocarcinoma	KRAS	G12V	OncoKB: Oncogenic, level_3b, level_r1;CIViC: diagnosticCount: 0, predictiveCount: 32, prognosticCount: 1, predisposingCount: 0, oncogenicCount: 0, functionalCount: 0;MyCancerGenome: present;CancerHotspot: yes;3DHotspot: yes			MutationAssessor: impact: low, score: 1.84;SIFT: impact: deleterious, score: 0;Polyphen-2: impact: probably_damaging, score: 0.972	Missense_Mutation	SNP	Diploid	25876	SOMATIC	Unknown	MSKCC	12	25398284	25398284	C	A	12:g.25398284C>A	ENST00000311936.3:c.35G>T	0.06		39	626		389	15	45327		Pathogenic			37	EO	Over_35	21.7	NW	13.2		WEIGHT LOSS; CHANGE BOWEL HABITS	0.0015	IMPACT468		1		MSS
Colorectal Cancer (MSK, JNCI 2021)	P-0035333-T01-IM6	Colorectal Cancer	Rectal Adenocarcinoma	KRAS	G12V	OncoKB: Oncogenic, level_3b, level_r1;CIViC: diagnosticCount: 0, predictiveCount: 32, prognosticCount: 1, predisposingCount: 0, oncogenicCount: 0, functionalCount: 0;MyCancerGenome: present;CancerHotspot: yes;3DHotspot: yes			MutationAssessor: impact: low, score: 1.84;SIFT: impact: deleterious, score: 0;Polyphen-2: impact: probably_damaging, score: 0.972	Missense_Mutation	SNP	Diploid	25876	SOMATIC	Unknown	MSKCC	12	25398284	25398284	C	A	12:g.25398284C>A	ENST00000311936.3:c.35G>T	0.26		202	582		467	6	45327		Pathogenic			49	EO	Over_35	23.8	NW	5.3	0	BRBPR	0.3552	IMPACT468	0			MSS
Colorectal Cancer (MSK, JNCI 2021)	P-0035773-T01-IM6	Colorectal Cancer	Colon Adenocarcinoma	KRAS	G12V	OncoKB: Oncogenic, level_3b, level_r1;CIViC: diagnosticCount: 0, predictiveCount: 32, prognosticCount: 1, predisposingCount: 0, oncogenicCount: 0, functionalCount: 0;MyCancerGenome: present;CancerHotspot: yes;3DHotspot: yes			MutationAssessor: impact: low, score: 1.84;SIFT: impact: deleterious, score: 0;Polyphen-2: impact: probably_damaging, score: 0.972	Missense_Mutation	SNP	Diploid	25876	SOMATIC	Unknown	MSKCC	12	25398284	25398284	C	A	12:g.25398284C>A	ENST00000311936.3:c.35G>T	0.14		96	591		529	7	45327		Pathogenic			44	EO	Over_35	21.2	NW	6.1	0	BRBPR	0.0057	IMPACT468	1	0		MSS
Colorectal Cancer (MSK, JNCI 2021)	P-0036450-T01-IM6	Colorectal Cancer	Colon Adenocarcinoma	KRAS	G12V	OncoKB: Oncogenic, level_3b, level_r1;CIViC: diagnosticCount: 0, predictiveCount: 32, prognosticCount: 1, predisposingCount: 0, oncogenicCount: 0, functionalCount: 0;MyCancerGenome: present;CancerHotspot: yes;3DHotspot: yes			MutationAssessor: impact: low, score: 1.84;SIFT: impact: deleterious, score: 0;Polyphen-2: impact: probably_damaging, score: 0.972	Missense_Mutation	SNP	Diploid	25876	SOMATIC	Unknown	MSKCC	12	25398284	25398284	C	A	12:g.25398284C>A	ENST00000311936.3:c.35G>T	0.2		105	410		463	4	45327		Pathogenic			38	EO	Over_35	25.4	OW	3.5	0	CHANGE IN BOWEL HABITS; BRBPR	0.3542	IMPACT468	0	1		MSS
Colorectal Cancer (MSK, JNCI 2021)	P-0036760-T01-IM6	Colorectal Cancer	Colon Adenocarcinoma	KRAS	G12V	OncoKB: Oncogenic, level_3b, level_r1;CIViC: diagnosticCount: 0, predictiveCount: 32, prognosticCount: 1, predisposingCount: 0, oncogenicCount: 0, functionalCount: 0;MyCancerGenome: present;CancerHotspot: yes;3DHotspot: yes			MutationAssessor: impact: low, score: 1.84;SIFT: impact: deleterious, score: 0;Polyphen-2: impact: probably_damaging, score: 0.972	Missense_Mutation	SNP	Diploid	25876	SOMATIC	Unknown	MSKCC	12	25398284	25398284	C	A	12:g.25398284C>A	ENST00000311936.3:c.35G>T	0.39		201	318		348	10	45327		Pathogenic			42	EO	Over_35	18.7	NW	8.8	0	BRBPR	0.1435	IMPACT468	0			MSS
Colorectal Cancer (MSK, JNCI 2021)	P-0037377-T01-IM6	Colorectal Cancer	Colon Adenocarcinoma	KRAS	G12V	OncoKB: Oncogenic, level_3b, level_r1;CIViC: diagnosticCount: 0, predictiveCount: 32, prognosticCount: 1, predisposingCount: 0, oncogenicCount: 0, functionalCount: 0;MyCancerGenome: present;CancerHotspot: yes;3DHotspot: yes			MutationAssessor: impact: low, score: 1.84;SIFT: impact: deleterious, score: 0;Polyphen-2: impact: probably_damaging, score: 0.972	Missense_Mutation	SNP	Diploid	25876	SOMATIC	Unknown	MSKCC	12	25398284	25398284	C	A	12:g.25398284C>A	ENST00000311936.3:c.35G>T	0.16		84	441		372	7	45327		Pathogenic			36	EO	Over_35	20.9	NW	6.1	0	ABDOMINAL PAIN, BLOATING/ABDOMINAL GIRTH/PELVIC PRESSURE,PAIN	0.1566	IMPACT468	0	1		MSS
Colorectal Cancer (MSK, JNCI 2021)	P-0038014-T01-IM6	Colorectal Cancer	Rectal Adenocarcinoma	KRAS	G12V	OncoKB: Oncogenic, level_3b, level_r1;CIViC: diagnosticCount: 0, predictiveCount: 32, prognosticCount: 1, predisposingCount: 0, oncogenicCount: 0, functionalCount: 0;MyCancerGenome: present;CancerHotspot: yes;3DHotspot: yes			MutationAssessor: impact: low, score: 1.84;SIFT: impact: deleterious, score: 0;Polyphen-2: impact: probably_damaging, score: 0.972	Missense_Mutation	SNP	Diploid	25876	SOMATIC	Unknown	MSKCC	12	25398284	25398284	C	A	12:g.25398284C>A	ENST00000311936.3:c.35G>T	0.29		115	280		290	11	45327		Pathogenic			39	EO	Over_35	27.7	OW	9.7	0	BRBPR	0.2082	IMPACT468	0			MSS
Colorectal Cancer (MSK, JNCI 2021)	P-0039042-T01-IM6	Colorectal Cancer	Colon Adenocarcinoma	KRAS	G12V	OncoKB: Oncogenic, level_3b, level_r1;CIViC: diagnosticCount: 0, predictiveCount: 32, prognosticCount: 1, predisposingCount: 0, oncogenicCount: 0, functionalCount: 0;MyCancerGenome: present;CancerHotspot: yes;3DHotspot: yes			MutationAssessor: impact: low, score: 1.84;SIFT: impact: deleterious, score: 0;Polyphen-2: impact: probably_damaging, score: 0.972	Missense_Mutation	SNP	Diploid	25876	SOMATIC	Unknown	MSKCC	12	25398284	25398284	C	A	12:g.25398284C>A	ENST00000311936.3:c.35G>T	0.25		90	276		347	7	45327		Pathogenic			48	EO	Over_35	21.6	NW	6.1	0	ABDOMINAL PAIN, BLOATING/ABDOMINAL GIRTH/PELVIC PRESSURE,PAIN	0.2965	IMPACT468	0			MSS
Colorectal Cancer (MSK, JNCI 2021)	P-0039606-T01-IM6	Colorectal Cancer	Colorectal Adenocarcinoma	KRAS	G12V	OncoKB: Oncogenic, level_3b, level_r1;CIViC: diagnosticCount: 0, predictiveCount: 32, prognosticCount: 1, predisposingCount: 0, oncogenicCount: 0, functionalCount: 0;MyCancerGenome: present;CancerHotspot: yes;3DHotspot: yes			MutationAssessor: impact: low, score: 1.84;SIFT: impact: deleterious, score: 0;Polyphen-2: impact: probably_damaging, score: 0.972	Missense_Mutation	SNP	Diploid	25876	SOMATIC	Unknown	MSKCC	12	25398284	25398284	C	A	12:g.25398284C>A	ENST00000311936.3:c.35G>T	0.34		216	416		437	11	45327		Pathogenic			44	EO	Over_35	32.4	OB	9.7		CHANGE IN BOWEL HABITS; ABDOMINAL PAIN, BLOATING/ABDOMINAL GIRTH/PELVIC PRESSURE,PAIN	0.2086	IMPACT468				MSS
Colorectal Cancer (MSK, JNCI 2021)	P-0040030-T01-IM6	Colorectal Cancer	Colon Adenocarcinoma	KRAS	G12V	OncoKB: Oncogenic, level_3b, level_r1;CIViC: diagnosticCount: 0, predictiveCount: 32, prognosticCount: 1, predisposingCount: 0, oncogenicCount: 0, functionalCount: 0;MyCancerGenome: present;CancerHotspot: yes;3DHotspot: yes			MutationAssessor: impact: low, score: 1.84;SIFT: impact: deleterious, score: 0;Polyphen-2: impact: probably_damaging, score: 0.972	Missense_Mutation	SNP	Diploid	25876	SOMATIC	Unknown	MSKCC	12	25398284	25398284	C	A	12:g.25398284C>A	ENST00000311936.3:c.35G>T	0.16		67	346		432	4	45327		Pathogenic			37	EO	Over_35			3.5			0.0006	IMPACT468
Colorectal Cancer (MSK, JNCI 2021)	P-0000721-T01-IM3	Colorectal Cancer	Colon Adenocarcinoma	KRAS	G12D	OncoKB: Oncogenic, level_3b, level_r1;CIViC: diagnosticCount: 2, predictiveCount: 51, prognosticCount: 6, predisposingCount: 0, oncogenicCount: 0, functionalCount: 0;MyCancerGenome: present;CancerHotspot: yes;3DHotspot: yes			MutationAssessor: impact: medium, score: 2.685;SIFT: impact: deleterious, score: 0;Polyphen-2: impact: benign, score: 0.303	Missense_Mutation	SNP	Diploid	25876	SOMATIC	Unknown	MSKCC	12	25398284	25398284	C	T	12:g.25398284C>T	ENST00000311936.3:c.35G>A	0.3		294	670		371	8	45327		Pathogenic			58	AO	AO	21.9	NW	8.9	0	gas pain, change in stool caliber, melena, diarrhea, weight loss, anemia	0.0971	IMPACT341	1	1		MSS
Colorectal Cancer (MSK, JNCI 2021)	P-0000885-T01-IM3	Colorectal Cancer	Colon Adenocarcinoma	KRAS	G12D	OncoKB: Oncogenic, level_3b, level_r1;CIViC: diagnosticCount: 2, predictiveCount: 51, prognosticCount: 6, predisposingCount: 0, oncogenicCount: 0, functionalCount: 0;MyCancerGenome: present;CancerHotspot: yes;3DHotspot: yes			MutationAssessor: impact: medium, score: 2.685;SIFT: impact: deleterious, score: 0;Polyphen-2: impact: benign, score: 0.303	Missense_Mutation	SNP	Diploid	25876	SOMATIC	Unknown	MSKCC	12	25398284	25398284	C	T	12:g.25398284C>T	ENST00000311936.3:c.35G>A	0.15		108	609		417	10	45327		Pathogenic			51	AO	AO	33.5	OB	11.2	0	abdominal cramps	0.0859	IMPACT341	0	1		MSS
Colorectal Cancer (MSK, JNCI 2021)	P-0001346-T01-IM3	Colorectal Cancer	Colon Adenocarcinoma	KRAS	G12D	OncoKB: Oncogenic, level_3b, level_r1;CIViC: diagnosticCount: 2, predictiveCount: 51, prognosticCount: 6, predisposingCount: 0, oncogenicCount: 0, functionalCount: 0;MyCancerGenome: present;CancerHotspot: yes;3DHotspot: yes			MutationAssessor: impact: medium, score: 2.685;SIFT: impact: deleterious, score: 0;Polyphen-2: impact: benign, score: 0.303	Missense_Mutation	SNP	Diploid	25876	SOMATIC	Unknown	MSKCC	12	25398284	25398284	C	T	12:g.25398284C>T	ENST00000311936.3:c.35G>A	0.28		220	576		371	4	45327		Pathogenic			58	AO	AO	26.5	OW	4.5	1	Change in bowel habits; BRBPR	0.1535	IMPACT341	1	0		MSS
Colorectal Cancer (MSK, JNCI 2021)	P-0001494-T01-IM3	Colorectal Cancer	Mucinous Adenocarcinoma of the Colon and Rectum	KRAS	G12D	OncoKB: Oncogenic, level_3b, level_r1;CIViC: diagnosticCount: 2, predictiveCount: 51, prognosticCount: 6, predisposingCount: 0, oncogenicCount: 0, functionalCount: 0;MyCancerGenome: present;CancerHotspot: yes;3DHotspot: yes			MutationAssessor: impact: medium, score: 2.685;SIFT: impact: deleterious, score: 0;Polyphen-2: impact: benign, score: 0.303	Missense_Mutation	SNP	Diploid	25876	SOMATIC	Unknown	MSKCC	12	25398284	25398284	C	T	12:g.25398284C>T	ENST00000311936.3:c.35G>A	0.23		151	507		369	57	45327		Pathogenic			63	AO	AO	26.8	OW	63.6	0	abdominal pain; change in bowel habits	0.033	IMPACT341	1			MSI
Colorectal Cancer (MSK, JNCI 2021)	P-0001658-T01-IM3	Colorectal Cancer	Colon Adenocarcinoma	KRAS	G12D	OncoKB: Oncogenic, level_3b, level_r1;CIViC: diagnosticCount: 2, predictiveCount: 51, prognosticCount: 6, predisposingCount: 0, oncogenicCount: 0, functionalCount: 0;MyCancerGenome: present;CancerHotspot: yes;3DHotspot: yes			MutationAssessor: impact: medium, score: 2.685;SIFT: impact: deleterious, score: 0;Polyphen-2: impact: benign, score: 0.303	Missense_Mutation	SNP	Diploid	25876	SOMATIC	Unknown	MSKCC	12	25398284	25398284	C	T	12:g.25398284C>T	ENST00000311936.3:c.35G>A	0.27		304	840		551	6	45327		Pathogenic			90	AO	AO	33	OB	6.7	0	abdominal pain	0.3049	IMPACT341	1	0		MSS
Colorectal Cancer (MSK, JNCI 2021)	P-0001693-T02-IM3	Colorectal Cancer	Colon Adenocarcinoma	KRAS	G12D	OncoKB: Oncogenic, level_3b, level_r1;CIViC: diagnosticCount: 2, predictiveCount: 51, prognosticCount: 6, predisposingCount: 0, oncogenicCount: 0, functionalCount: 0;MyCancerGenome: present;CancerHotspot: yes;3DHotspot: yes			MutationAssessor: impact: medium, score: 2.685;SIFT: impact: deleterious, score: 0;Polyphen-2: impact: benign, score: 0.303	Missense_Mutation	SNP	Diploid	25876	SOMATIC	Unknown	MSKCC	12	25398284	25398284	C	T	12:g.25398284C>T	ENST00000311936.3:c.35G>A	0.09	0.004	25	248	2	501	9	45327		Pathogenic			51	AO	AO	27.3	OW	10	0	fever, night sweats	0.1282	IMPACT341	0	1		MSS
Colorectal Cancer (MSK, JNCI 2021)	P-0001769-T01-IM3	Colorectal Cancer	Mucinous Adenocarcinoma of the Colon and Rectum	KRAS	G12D	OncoKB: Oncogenic, level_3b, level_r1;CIViC: diagnosticCount: 2, predictiveCount: 51, prognosticCount: 6, predisposingCount: 0, oncogenicCount: 0, functionalCount: 0;MyCancerGenome: present;CancerHotspot: yes;3DHotspot: yes			MutationAssessor: impact: medium, score: 2.685;SIFT: impact: deleterious, score: 0;Polyphen-2: impact: benign, score: 0.303	Missense_Mutation	SNP	Diploid	25876	SOMATIC	Unknown	MSKCC	12	25398284	25398284	C	T	12:g.25398284C>T	ENST00000311936.3:c.35G>A	0.4		389	592		275	13	45327		Pathogenic			77	AO	AO	28.3	OW	14.5	0	rectal bleeding, anemia	0.3619	IMPACT341	0	0		MSS
Colorectal Cancer (MSK, JNCI 2021)	P-0002155-T01-IM3	Colorectal Cancer	Rectal Adenocarcinoma	KRAS	G12D	OncoKB: Oncogenic, level_3b, level_r1;CIViC: diagnosticCount: 2, predictiveCount: 51, prognosticCount: 6, predisposingCount: 0, oncogenicCount: 0, functionalCount: 0;MyCancerGenome: present;CancerHotspot: yes;3DHotspot: yes			MutationAssessor: impact: medium, score: 2.685;SIFT: impact: deleterious, score: 0;Polyphen-2: impact: benign, score: 0.303	Missense_Mutation	SNP	Diploid	25876	SOMATIC	Unknown	MSKCC	12	25398284	25398284	C	T	12:g.25398284C>T	ENST00000311936.3:c.35G>A	0.12		80	586		182	3	45327		Pathogenic			57	AO	AO	23.8	NW	3.3	0	Abodminal pain; change in bowel habits; BRBPR	0.0441	IMPACT341	1	0		MSS
Colorectal Cancer (MSK, JNCI 2021)	P-0002475-T01-IM3	Colorectal Cancer	Colon Adenocarcinoma	KRAS	G12D	OncoKB: Oncogenic, level_3b, level_r1;CIViC: diagnosticCount: 2, predictiveCount: 51, prognosticCount: 6, predisposingCount: 0, oncogenicCount: 0, functionalCount: 0;MyCancerGenome: present;CancerHotspot: yes;3DHotspot: yes			MutationAssessor: impact: medium, score: 2.685;SIFT: impact: deleterious, score: 0;Polyphen-2: impact: benign, score: 0.303	Missense_Mutation	SNP	Diploid	25876	SOMATIC	Unknown	MSKCC	12	25398284	25398284	C	T	12:g.25398284C>T	ENST00000311936.3:c.35G>A	0.31		295	643		466	9	45327		Pathogenic			68	AO	AO	32.5	OB	10	0	Abdominal pain; BRBPR	0.313	IMPACT341	1	0		MSS
Colorectal Cancer (MSK, JNCI 2021)	P-0002563-T01-IM3	Colorectal Cancer	Rectal Adenocarcinoma	KRAS	G12D	OncoKB: Oncogenic, level_3b, level_r1;CIViC: diagnosticCount: 2, predictiveCount: 51, prognosticCount: 6, predisposingCount: 0, oncogenicCount: 0, functionalCount: 0;MyCancerGenome: present;CancerHotspot: yes;3DHotspot: yes			MutationAssessor: impact: medium, score: 2.685;SIFT: impact: deleterious, score: 0;Polyphen-2: impact: benign, score: 0.303	Missense_Mutation	SNP	Diploid	25876	UNKNOWN	NA	MSKCC	12	25398284	25398284	C	T	12:g.25398284C>T	ENST00000311936.3:c.35G>A	0.32	0.0016	308	655	2	1248	6	45327		Pathogenic			68	AO	AO	21.9	NW	6.7	0	self rectal exam	0.2115	IMPACT341	1	0		MSS
Colorectal Cancer (MSK, JNCI 2021)	P-0002852-T01-IM3	Colorectal Cancer	Rectal Adenocarcinoma	KRAS	G12D	OncoKB: Oncogenic, level_3b, level_r1;CIViC: diagnosticCount: 2, predictiveCount: 51, prognosticCount: 6, predisposingCount: 0, oncogenicCount: 0, functionalCount: 0;MyCancerGenome: present;CancerHotspot: yes;3DHotspot: yes			MutationAssessor: impact: medium, score: 2.685;SIFT: impact: deleterious, score: 0;Polyphen-2: impact: benign, score: 0.303	Missense_Mutation	SNP	Diploid	25876	SOMATIC	Unknown	MSKCC	12	25398284	25398284	C	T	12:g.25398284C>T	ENST00000311936.3:c.35G>A	0.22		176	612		428	9	45327		Pathogenic			65	AO	AO	34.1	OB	10	1	incidentally found on scan	0.039	IMPACT341	1	0		MSS
Colorectal Cancer (MSK, JNCI 2021)	P-0002902-T01-IM3	Colorectal Cancer	Mucinous Adenocarcinoma of the Colon and Rectum	KRAS	G12D	OncoKB: Oncogenic, level_3b, level_r1;CIViC: diagnosticCount: 2, predictiveCount: 51, prognosticCount: 6, predisposingCount: 0, oncogenicCount: 0, functionalCount: 0;MyCancerGenome: present;CancerHotspot: yes;3DHotspot: yes			MutationAssessor: impact: medium, score: 2.685;SIFT: impact: deleterious, score: 0;Polyphen-2: impact: benign, score: 0.303	Missense_Mutation	SNP	Diploid	25876	SOMATIC	Unknown	MSKCC	12	25398284	25398284	C	T	12:g.25398284C>T	ENST00000311936.3:c.35G>A	0.22		153	542		486	10	45327		Pathogenic			84	AO	AO	31.8	OB	11.2	0		0.0222	IMPACT341	1	1		MSS
Colorectal Cancer (MSK, JNCI 2021)	P-0004369-T01-IM5	Colorectal Cancer	Colon Adenocarcinoma	KRAS	G12D	OncoKB: Oncogenic, level_3b, level_r1;CIViC: diagnosticCount: 2, predictiveCount: 51, prognosticCount: 6, predisposingCount: 0, oncogenicCount: 0, functionalCount: 0;MyCancerGenome: present;CancerHotspot: yes;3DHotspot: yes			MutationAssessor: impact: medium, score: 2.685;SIFT: impact: deleterious, score: 0;Polyphen-2: impact: benign, score: 0.303	Missense_Mutation	SNP	Diploid	25876	SOMATIC	Unknown	MSKCC	12	25398284	25398284	C	T	12:g.25398284C>T	ENST00000311936.3:c.35G>A	0.3	0.0027	143	339	1	370	4	45327		Pathogenic			49	EO	Over_35	26.8	OW	3.9	0	BRBPR	0.2472	IMPACT410	0			MSS
Colorectal Cancer (MSK, JNCI 2021)	P-0004511-T01-IM5	Colorectal Cancer	Colon Adenocarcinoma	KRAS	G12D	OncoKB: Oncogenic, level_3b, level_r1;CIViC: diagnosticCount: 2, predictiveCount: 51, prognosticCount: 6, predisposingCount: 0, oncogenicCount: 0, functionalCount: 0;MyCancerGenome: present;CancerHotspot: yes;3DHotspot: yes			MutationAssessor: impact: medium, score: 2.685;SIFT: impact: deleterious, score: 0;Polyphen-2: impact: benign, score: 0.303	Missense_Mutation	SNP	Diploid	25876	SOMATIC	Unknown	MSKCC	12	25398284	25398284	C	T	12:g.25398284C>T	ENST00000311936.3:c.35G>A	0.17		100	485		378	12	45327		Pathogenic			54	AO	AO	32.9	OB	11.8	0	rectal bleeding	0	IMPACT410	0	1		MSS
Colorectal Cancer (MSK, JNCI 2021)	P-0005200-T01-IM5	Colorectal Cancer	Colon Adenocarcinoma	KRAS	G12D	OncoKB: Oncogenic, level_3b, level_r1;CIViC: diagnosticCount: 2, predictiveCount: 51, prognosticCount: 6, predisposingCount: 0, oncogenicCount: 0, functionalCount: 0;MyCancerGenome: present;CancerHotspot: yes;3DHotspot: yes			MutationAssessor: impact: medium, score: 2.685;SIFT: impact: deleterious, score: 0;Polyphen-2: impact: benign, score: 0.303	Missense_Mutation	SNP	Diploid	25876	SOMATIC	Unknown	MSKCC	12	25398284	25398284	C	T	12:g.25398284C>T	ENST00000311936.3:c.35G>A	0.3		169	386		208	7	45327		Pathogenic			71	AO	AO	28.3	OW	6.9	0	fatigue, dyspnea	0.1012	IMPACT410	1			MSS
Colorectal Cancer (MSK, JNCI 2021)	P-0005230-T01-IM5	Colorectal Cancer	Colon Adenocarcinoma	KRAS	G12D	OncoKB: Oncogenic, level_3b, level_r1;CIViC: diagnosticCount: 2, predictiveCount: 51, prognosticCount: 6, predisposingCount: 0, oncogenicCount: 0, functionalCount: 0;MyCancerGenome: present;CancerHotspot: yes;3DHotspot: yes			MutationAssessor: impact: medium, score: 2.685;SIFT: impact: deleterious, score: 0;Polyphen-2: impact: benign, score: 0.303	Missense_Mutation	SNP	Diploid	25876	SOMATIC	Unknown	MSKCC	12	25398284	25398284	C	T	12:g.25398284C>T	ENST00000311936.3:c.35G>A	0.04		25	539		610	65	45327		Pathogenic			64	AO	AO	24	NW	63.9	0	Other; Syncopy	0.0753	IMPACT410	0			MSI
Colorectal Cancer (MSK, JNCI 2021)	P-0005788-T01-IM5	Colorectal Cancer	Colon Adenocarcinoma	KRAS	G12D	OncoKB: Oncogenic, level_3b, level_r1;CIViC: diagnosticCount: 2, predictiveCount: 51, prognosticCount: 6, predisposingCount: 0, oncogenicCount: 0, functionalCount: 0;MyCancerGenome: present;CancerHotspot: yes;3DHotspot: yes			MutationAssessor: impact: medium, score: 2.685;SIFT: impact: deleterious, score: 0;Polyphen-2: impact: benign, score: 0.303	Missense_Mutation	SNP	Diploid	25876	SOMATIC	Unknown	MSKCC	12	25398284	25398284	C	T	12:g.25398284C>T	ENST00000311936.3:c.35G>A	0.13		67	467		377	6	45327		Pathogenic			52	AO	AO	26.3	OW	5.9	0	abdominal pain	0.0055	IMPACT410	1	0		MSS
Colorectal Cancer (MSK, JNCI 2021)	P-0006359-T01-IM5	Colorectal Cancer	Colon Adenocarcinoma	KRAS	G12D	OncoKB: Oncogenic, level_3b, level_r1;CIViC: diagnosticCount: 2, predictiveCount: 51, prognosticCount: 6, predisposingCount: 0, oncogenicCount: 0, functionalCount: 0;MyCancerGenome: present;CancerHotspot: yes;3DHotspot: yes			MutationAssessor: impact: medium, score: 2.685;SIFT: impact: deleterious, score: 0;Polyphen-2: impact: benign, score: 0.303	Missense_Mutation	SNP	Diploid	25876	SOMATIC	Unknown	MSKCC	12	25398284	25398284	C	T	12:g.25398284C>T	ENST00000311936.3:c.35G>A	0.45	0.003	447	555	1	335	5	45327		Pathogenic			60	AO	AO	25.4	OW	4.9	0	abdominal pain; change in bowel habits	0.2216	IMPACT410	0			MSS
Colorectal Cancer (MSK, JNCI 2021)	P-0006469-T01-IM5	Colorectal Cancer	Mucinous Adenocarcinoma of the Colon and Rectum	KRAS	G12D	OncoKB: Oncogenic, level_3b, level_r1;CIViC: diagnosticCount: 2, predictiveCount: 51, prognosticCount: 6, predisposingCount: 0, oncogenicCount: 0, functionalCount: 0;MyCancerGenome: present;CancerHotspot: yes;3DHotspot: yes			MutationAssessor: impact: medium, score: 2.685;SIFT: impact: deleterious, score: 0;Polyphen-2: impact: benign, score: 0.303	Missense_Mutation	SNP	Diploid	25876	SOMATIC	Unknown	MSKCC	12	25398284	25398284	C	T	12:g.25398284C>T	ENST00000311936.3:c.35G>A	0.29		125	312		341	7	45327		Pathogenic			65	AO	AO	31.7	OB	6.9	1	Change in bowel habits	0.1822	IMPACT410	1	0		MSS
Colorectal Cancer (MSK, JNCI 2021)	P-0006559-T01-IM5	Colorectal Cancer	Colon Adenocarcinoma	KRAS	G12D	OncoKB: Oncogenic, level_3b, level_r1;CIViC: diagnosticCount: 2, predictiveCount: 51, prognosticCount: 6, predisposingCount: 0, oncogenicCount: 0, functionalCount: 0;MyCancerGenome: present;CancerHotspot: yes;3DHotspot: yes			MutationAssessor: impact: medium, score: 2.685;SIFT: impact: deleterious, score: 0;Polyphen-2: impact: benign, score: 0.303	Missense_Mutation	SNP	Diploid	25876	SOMATIC	Unknown	MSKCC	12	25398284	25398284	C	T	12:g.25398284C>T	ENST00000311936.3:c.35G>A	0.14		199	1177		354	6	45327		Pathogenic			68	AO	AO	31.7	OB	5.9	0	BRBPR	0.1103	IMPACT410	1			MSS
Colorectal Cancer (MSK, JNCI 2021)	P-0006581-T01-IM5	Colorectal Cancer	Colon Adenocarcinoma	KRAS	G12D	OncoKB: Oncogenic, level_3b, level_r1;CIViC: diagnosticCount: 2, predictiveCount: 51, prognosticCount: 6, predisposingCount: 0, oncogenicCount: 0, functionalCount: 0;MyCancerGenome: present;CancerHotspot: yes;3DHotspot: yes			MutationAssessor: impact: medium, score: 2.685;SIFT: impact: deleterious, score: 0;Polyphen-2: impact: benign, score: 0.303	Missense_Mutation	SNP	Diploid	25876	SOMATIC	Unknown	MSKCC	12	25398284	25398284	C	T	12:g.25398284C>T	ENST00000311936.3:c.35G>A	0.21		145	539		295	10	45327		Pathogenic			78	AO	AO	29	OW	9.8	0	incidentally found on colonoscopy	0.1118	IMPACT410	1	1		MSS
Colorectal Cancer (MSK, JNCI 2021)	P-0006587-T01-IM5	Colorectal Cancer	Colon Adenocarcinoma	KRAS	G12D	OncoKB: Oncogenic, level_3b, level_r1;CIViC: diagnosticCount: 2, predictiveCount: 51, prognosticCount: 6, predisposingCount: 0, oncogenicCount: 0, functionalCount: 0;MyCancerGenome: present;CancerHotspot: yes;3DHotspot: yes			MutationAssessor: impact: medium, score: 2.685;SIFT: impact: deleterious, score: 0;Polyphen-2: impact: benign, score: 0.303	Missense_Mutation	SNP	Diploid	25876	SOMATIC	Unknown	MSKCC	12	25398284	25398284	C	T	12:g.25398284C>T	ENST00000311936.3:c.35G>A	0.1		131	1196		428	11	45327		Pathogenic			50	AO	AO	32.1	OB	10.8	0	Obstruction	0.0369	IMPACT410	0	1		MSS
Colorectal Cancer (MSK, JNCI 2021)	P-0006717-T01-IM5	Colorectal Cancer	Colon Adenocarcinoma	KRAS	G12D	OncoKB: Oncogenic, level_3b, level_r1;CIViC: diagnosticCount: 2, predictiveCount: 51, prognosticCount: 6, predisposingCount: 0, oncogenicCount: 0, functionalCount: 0;MyCancerGenome: present;CancerHotspot: yes;3DHotspot: yes			MutationAssessor: impact: medium, score: 2.685;SIFT: impact: deleterious, score: 0;Polyphen-2: impact: benign, score: 0.303	Missense_Mutation	SNP	Diploid	25876	SOMATIC	Unknown	MSKCC	12	25398284	25398284	C	T	12:g.25398284C>T	ENST00000311936.3:c.35G>A	0.26		142	405		341	3	45327		Pathogenic			64	AO	AO	20.4	NW	3	0	ABNORMAL IMAGING	0.0262	IMPACT410	1	1		MSS
Colorectal Cancer (MSK, JNCI 2021)	P-0006758-T01-IM5	Colorectal Cancer	Mucinous Adenocarcinoma of the Colon and Rectum	KRAS	G12D	OncoKB: Oncogenic, level_3b, level_r1;CIViC: diagnosticCount: 2, predictiveCount: 51, prognosticCount: 6, predisposingCount: 0, oncogenicCount: 0, functionalCount: 0;MyCancerGenome: present;CancerHotspot: yes;3DHotspot: yes			MutationAssessor: impact: medium, score: 2.685;SIFT: impact: deleterious, score: 0;Polyphen-2: impact: benign, score: 0.303	Missense_Mutation	SNP	Diploid	25876	SOMATIC	Unknown	MSKCC	12	25398284	25398284	C	T	12:g.25398284C>T	ENST00000311936.3:c.35G>A	0.12		98	753		531	26	45327		Pathogenic			47	EO	Over_35	23.2	NW	25.6	0	BRBPR	0.0354	IMPACT410	1			MSS
Colorectal Cancer (MSK, JNCI 2021)	P-0006778-T01-IM5	Colorectal Cancer	Colon Adenocarcinoma	KRAS	G12D	OncoKB: Oncogenic, level_3b, level_r1;CIViC: diagnosticCount: 2, predictiveCount: 51, prognosticCount: 6, predisposingCount: 0, oncogenicCount: 0, functionalCount: 0;MyCancerGenome: present;CancerHotspot: yes;3DHotspot: yes			MutationAssessor: impact: medium, score: 2.685;SIFT: impact: deleterious, score: 0;Polyphen-2: impact: benign, score: 0.303	Missense_Mutation	SNP	Diploid	25876	SOMATIC	Unknown	MSKCC	12	25398284	25398284	C	T	12:g.25398284C>T	ENST00000311936.3:c.35G>A	0.15		93	543		397	5	45327		Pathogenic			68	AO	AO	29.8	OW	4.9	0	BRBPR	0.1678	IMPACT410	1	1		MSS
Colorectal Cancer (MSK, JNCI 2021)	P-0006933-T01-IM5	Colorectal Cancer	Colon Adenocarcinoma	KRAS	G12D	OncoKB: Oncogenic, level_3b, level_r1;CIViC: diagnosticCount: 2, predictiveCount: 51, prognosticCount: 6, predisposingCount: 0, oncogenicCount: 0, functionalCount: 0;MyCancerGenome: present;CancerHotspot: yes;3DHotspot: yes			MutationAssessor: impact: medium, score: 2.685;SIFT: impact: deleterious, score: 0;Polyphen-2: impact: benign, score: 0.303	Missense_Mutation	SNP	Diploid	25876	SOMATIC	Unknown	MSKCC	12	25398284	25398284	C	T	12:g.25398284C>T	ENST00000311936.3:c.35G>A	0.45		263	323		429	5	45327		Pathogenic			51	AO	AO	30.4	OB	4.9	0	Anemia; BRBPR	0.1796	IMPACT410	0	0		MSS
Colorectal Cancer (MSK, JNCI 2021)	P-0007128-T01-IM5	Colorectal Cancer	Colon Adenocarcinoma	KRAS	G12D	OncoKB: Oncogenic, level_3b, level_r1;CIViC: diagnosticCount: 2, predictiveCount: 51, prognosticCount: 6, predisposingCount: 0, oncogenicCount: 0, functionalCount: 0;MyCancerGenome: present;CancerHotspot: yes;3DHotspot: yes			MutationAssessor: impact: medium, score: 2.685;SIFT: impact: deleterious, score: 0;Polyphen-2: impact: benign, score: 0.303	Missense_Mutation	SNP	Diploid	25876	SOMATIC	Unknown	MSKCC	12	25398284	25398284	C	T	12:g.25398284C>T	ENST00000311936.3:c.35G>A	0.42		146	198		386	10	45327		Pathogenic			70	AO	AO	27.1	OW	10.8	0	incidentally found on colonoscopy	0.3089	IMPACT410	1	1		MSS
Colorectal Cancer (MSK, JNCI 2021)	P-0007272-T01-IM5	Colorectal Cancer	Colon Adenocarcinoma	KRAS	G12D	OncoKB: Oncogenic, level_3b, level_r1;CIViC: diagnosticCount: 2, predictiveCount: 51, prognosticCount: 6, predisposingCount: 0, oncogenicCount: 0, functionalCount: 0;MyCancerGenome: present;CancerHotspot: yes;3DHotspot: yes			MutationAssessor: impact: medium, score: 2.685;SIFT: impact: deleterious, score: 0;Polyphen-2: impact: benign, score: 0.303	Missense_Mutation	SNP	Diploid	25876	SOMATIC	Unknown	MSKCC	12	25398284	25398284	C	T	12:g.25398284C>T	ENST00000311936.3:c.35G>A	0.23		309	1036		377	6	45327		Pathogenic			47	EO	Over_35	24.2	NW	5.9	0	SCREENING COLONOSCOPY	0.1158	IMPACT410	0	0		MSS
Colorectal Cancer (MSK, JNCI 2021)	P-0007287-T01-IM5	Colorectal Cancer	Colon Adenocarcinoma	KRAS	G12D	OncoKB: Oncogenic, level_3b, level_r1;CIViC: diagnosticCount: 2, predictiveCount: 51, prognosticCount: 6, predisposingCount: 0, oncogenicCount: 0, functionalCount: 0;MyCancerGenome: present;CancerHotspot: yes;3DHotspot: yes			MutationAssessor: impact: medium, score: 2.685;SIFT: impact: deleterious, score: 0;Polyphen-2: impact: benign, score: 0.303	Missense_Mutation	SNP	Diploid	25876	SOMATIC	Unknown	MSKCC	12	25398284	25398284	C	T	12:g.25398284C>T	ENST00000311936.3:c.35G>A	0.34		213	415		262	8	45327		Pathogenic			63	AO	AO	26.4	OW	7.9	0	night sweats, diarrhea	0.4969	IMPACT410	1	0		MSS
Colorectal Cancer (MSK, JNCI 2021)	P-0007405-T01-IM5	Colorectal Cancer	Colon Adenocarcinoma	KRAS	G12D	OncoKB: Oncogenic, level_3b, level_r1;CIViC: diagnosticCount: 2, predictiveCount: 51, prognosticCount: 6, predisposingCount: 0, oncogenicCount: 0, functionalCount: 0;MyCancerGenome: present;CancerHotspot: yes;3DHotspot: yes			MutationAssessor: impact: medium, score: 2.685;SIFT: impact: deleterious, score: 0;Polyphen-2: impact: benign, score: 0.303	Missense_Mutation	SNP	Diploid	25876	SOMATIC	Unknown	MSKCC	12	25398284	25398284	C	T	12:g.25398284C>T	ENST00000311936.3:c.35G>A	0.29		194	486		291	7	45327		Pathogenic			53	AO	AO	31	OB	6.9	0	Abdominal pain; bloating; anemia	0.3512	IMPACT410	1	0		MSS
Colorectal Cancer (MSK, JNCI 2021)	P-0007548-T01-IM5	Colorectal Cancer	Colon Adenocarcinoma	KRAS	G12D	OncoKB: Oncogenic, level_3b, level_r1;CIViC: diagnosticCount: 2, predictiveCount: 51, prognosticCount: 6, predisposingCount: 0, oncogenicCount: 0, functionalCount: 0;MyCancerGenome: present;CancerHotspot: yes;3DHotspot: yes			MutationAssessor: impact: medium, score: 2.685;SIFT: impact: deleterious, score: 0;Polyphen-2: impact: benign, score: 0.303	Missense_Mutation	SNP	Diploid	25876	SOMATIC	Unknown	MSKCC	12	25398284	25398284	C	T	12:g.25398284C>T	ENST00000311936.3:c.35G>A	0.3		316	747		528	8	45327		Pathogenic			67	AO	AO	38.8	OB	7.9	1	Change in bowel habits; BRBPR	0.2624	IMPACT410	1	0		MSS
Colorectal Cancer (MSK, JNCI 2021)	P-0007600-T01-IM5	Colorectal Cancer	Colon Adenocarcinoma	KRAS	G12D	OncoKB: Oncogenic, level_3b, level_r1;CIViC: diagnosticCount: 2, predictiveCount: 51, prognosticCount: 6, predisposingCount: 0, oncogenicCount: 0, functionalCount: 0;MyCancerGenome: present;CancerHotspot: yes;3DHotspot: yes			MutationAssessor: impact: medium, score: 2.685;SIFT: impact: deleterious, score: 0;Polyphen-2: impact: benign, score: 0.303	Missense_Mutation	SNP	Diploid	25876	SOMATIC	Unknown	MSKCC	12	25398284	25398284	C	T	12:g.25398284C>T	ENST00000311936.3:c.35G>A	0.14		117	691		627	5	45327		Pathogenic			50	AO	AO	27.6	OW	4.9	0	dyspnea upon exertion, anemia	0.0287	IMPACT410	0	0		MSS
Colorectal Cancer (MSK, JNCI 2021)	P-0008729-T01-IM5	Colorectal Cancer	Colon Adenocarcinoma	KRAS	G12D	OncoKB: Oncogenic, level_3b, level_r1;CIViC: diagnosticCount: 2, predictiveCount: 51, prognosticCount: 6, predisposingCount: 0, oncogenicCount: 0, functionalCount: 0;MyCancerGenome: present;CancerHotspot: yes;3DHotspot: yes			MutationAssessor: impact: medium, score: 2.685;SIFT: impact: deleterious, score: 0;Polyphen-2: impact: benign, score: 0.303	Missense_Mutation	SNP	Diploid	25876	SOMATIC	Unknown	MSKCC	12	25398284	25398284	C	T	12:g.25398284C>T	ENST00000311936.3:c.35G>A	0.2		84	335		367	51	45327		Pathogenic			78	AO	AO	25.2	OW	49.2	0	rectal bleeding	0.0486	IMPACT410	1			MSI
Colorectal Cancer (MSK, JNCI 2021)	P-0008745-T01-IM5	Colorectal Cancer	Colon Adenocarcinoma	KRAS	G12D	OncoKB: Oncogenic, level_3b, level_r1;CIViC: diagnosticCount: 2, predictiveCount: 51, prognosticCount: 6, predisposingCount: 0, oncogenicCount: 0, functionalCount: 0;MyCancerGenome: present;CancerHotspot: yes;3DHotspot: yes			MutationAssessor: impact: medium, score: 2.685;SIFT: impact: deleterious, score: 0;Polyphen-2: impact: benign, score: 0.303	Missense_Mutation	SNP	Diploid	25876	SOMATIC	Unknown	MSKCC	12	25398284	25398284	C	T	12:g.25398284C>T	ENST00000311936.3:c.35G>A	0.14		120	741		464	28	45327		Pathogenic			85	AO	AO	25.5	OW	27.5	1	diarrhea, brbpr, weight loss	0.0639	IMPACT410	0			MSI
Colorectal Cancer (MSK, JNCI 2021)	P-0009305-T01-IM5	Colorectal Cancer	Colon Adenocarcinoma	KRAS	G12D	OncoKB: Oncogenic, level_3b, level_r1;CIViC: diagnosticCount: 2, predictiveCount: 51, prognosticCount: 6, predisposingCount: 0, oncogenicCount: 0, functionalCount: 0;MyCancerGenome: present;CancerHotspot: yes;3DHotspot: yes			MutationAssessor: impact: medium, score: 2.685;SIFT: impact: deleterious, score: 0;Polyphen-2: impact: benign, score: 0.303	Missense_Mutation	SNP	Diploid	25876	SOMATIC	Unknown	MSKCC	12	25398284	25398284	C	T	12:g.25398284C>T	ENST00000311936.3:c.35G>A	0.04		31	766		293	7	45327		Pathogenic			48	EO	Over_35	31.6	OB	6.9	0	FATIGUE	0.0017	IMPACT410	0	1		MSS
Colorectal Cancer (MSK, JNCI 2021)	P-0010350-T01-IM5	Colorectal Cancer	Colon Adenocarcinoma	KRAS	G12D	OncoKB: Oncogenic, level_3b, level_r1;CIViC: diagnosticCount: 2, predictiveCount: 51, prognosticCount: 6, predisposingCount: 0, oncogenicCount: 0, functionalCount: 0;MyCancerGenome: present;CancerHotspot: yes;3DHotspot: yes			MutationAssessor: impact: medium, score: 2.685;SIFT: impact: deleterious, score: 0;Polyphen-2: impact: benign, score: 0.303	Missense_Mutation	SNP	Diploid	25876	SOMATIC	Unknown	MSKCC	12	25398284	25398284	C	T	12:g.25398284C>T	ENST00000311936.3:c.35G>A	0.2		81	334		342	8	45327		Pathogenic			58	AO	AO	22.7	NW	7.9	0	thinning stools, blood in stool, weight loss	0.2393	IMPACT410	0	0		MSS
Colorectal Cancer (MSK, JNCI 2021)	P-0010352-T01-IM5	Colorectal Cancer	Colon Adenocarcinoma	KRAS	G12D	OncoKB: Oncogenic, level_3b, level_r1;CIViC: diagnosticCount: 2, predictiveCount: 51, prognosticCount: 6, predisposingCount: 0, oncogenicCount: 0, functionalCount: 0;MyCancerGenome: present;CancerHotspot: yes;3DHotspot: yes			MutationAssessor: impact: medium, score: 2.685;SIFT: impact: deleterious, score: 0;Polyphen-2: impact: benign, score: 0.303	Missense_Mutation	SNP	Diploid	25876	SOMATIC	Unknown	MSKCC	12	25398284	25398284	C	T	12:g.25398284C>T	ENST00000311936.3:c.35G>A	0.41		268	383		314	7	45327		Pathogenic			53	AO	AO	22.5	NW	6.9	0	Unknown	0.1752	IMPACT410	0	0		MSS
Colorectal Cancer (MSK, JNCI 2021)	P-0010535-T01-IM5	Colorectal Cancer	Rectal Adenocarcinoma	KRAS	G12D	OncoKB: Oncogenic, level_3b, level_r1;CIViC: diagnosticCount: 2, predictiveCount: 51, prognosticCount: 6, predisposingCount: 0, oncogenicCount: 0, functionalCount: 0;MyCancerGenome: present;CancerHotspot: yes;3DHotspot: yes			MutationAssessor: impact: medium, score: 2.685;SIFT: impact: deleterious, score: 0;Polyphen-2: impact: benign, score: 0.303	Missense_Mutation	SNP	Diploid	25876	SOMATIC	Unknown	MSKCC	12	25398284	25398284	C	T	12:g.25398284C>T	ENST00000311936.3:c.35G>A	0.2		143	567		331	9	45327		Pathogenic			49	EO	Over_35	23.5	NW	8.9	0	BRBPR; CHANGE IN BOWEL HABITS	0.0831	IMPACT410	0	1		MSS
Colorectal Cancer (MSK, JNCI 2021)	P-0010783-T01-IM5	Colorectal Cancer	Colon Adenocarcinoma	KRAS	G12D	OncoKB: Oncogenic, level_3b, level_r1;CIViC: diagnosticCount: 2, predictiveCount: 51, prognosticCount: 6, predisposingCount: 0, oncogenicCount: 0, functionalCount: 0;MyCancerGenome: present;CancerHotspot: yes;3DHotspot: yes			MutationAssessor: impact: medium, score: 2.685;SIFT: impact: deleterious, score: 0;Polyphen-2: impact: benign, score: 0.303	Missense_Mutation	SNP	Diploid	25876	SOMATIC	Unknown	MSKCC	12	25398284	25398284	C	T	12:g.25398284C>T	ENST00000311936.3:c.35G>A	0.3	0.0047	282	660	2	425	80	45327		Pathogenic			74	AO	AO	20.4	NW	78.7	0	abdominal pain, cramping, diarrhea, bloody stool	0.1042	IMPACT410	0			MSI
Colorectal Cancer (MSK, JNCI 2021)	P-0010985-T01-IM5	Colorectal Cancer	Colon Adenocarcinoma	KRAS	G12D	OncoKB: Oncogenic, level_3b, level_r1;CIViC: diagnosticCount: 2, predictiveCount: 51, prognosticCount: 6, predisposingCount: 0, oncogenicCount: 0, functionalCount: 0;MyCancerGenome: present;CancerHotspot: yes;3DHotspot: yes			MutationAssessor: impact: medium, score: 2.685;SIFT: impact: deleterious, score: 0;Polyphen-2: impact: benign, score: 0.303	Missense_Mutation	SNP	Diploid	25876	SOMATIC	Unknown	MSKCC	12	25398284	25398284	C	T	12:g.25398284C>T	ENST00000311936.3:c.35G>A	0.25		178	528		406	10	45327		Pathogenic			81	AO	AO	29	OW	9.8	0	anemia	0.0117	IMPACT410	0			MSS
Colorectal Cancer (MSK, JNCI 2021)	P-0011068-T01-IM5	Colorectal Cancer	Colon Adenocarcinoma	KRAS	G12D	OncoKB: Oncogenic, level_3b, level_r1;CIViC: diagnosticCount: 2, predictiveCount: 51, prognosticCount: 6, predisposingCount: 0, oncogenicCount: 0, functionalCount: 0;MyCancerGenome: present;CancerHotspot: yes;3DHotspot: yes			MutationAssessor: impact: medium, score: 2.685;SIFT: impact: deleterious, score: 0;Polyphen-2: impact: benign, score: 0.303	Missense_Mutation	SNP	Diploid	25876	SOMATIC	Unknown	MSKCC	12	25398284	25398284	C	T	12:g.25398284C>T	ENST00000311936.3:c.35G>A	0.17		66	333		344	44	45327		Pathogenic			56	AO	AO	31.6	OB	43.3	0	fatigue, weight loss, anorexia	0.0935	IMPACT410	0			MSI
Colorectal Cancer (MSK, JNCI 2021)	P-0011287-T01-IM5	Colorectal Cancer	Colon Adenocarcinoma	KRAS	G12D	OncoKB: Oncogenic, level_3b, level_r1;CIViC: diagnosticCount: 2, predictiveCount: 51, prognosticCount: 6, predisposingCount: 0, oncogenicCount: 0, functionalCount: 0;MyCancerGenome: present;CancerHotspot: yes;3DHotspot: yes			MutationAssessor: impact: medium, score: 2.685;SIFT: impact: deleterious, score: 0;Polyphen-2: impact: benign, score: 0.303	Missense_Mutation	SNP	Diploid	25876	SOMATIC	Unknown	MSKCC	12	25398284	25398284	C	T	12:g.25398284C>T	ENST00000311936.3:c.35G>A	0.18	0.0078	131	586	3	383	7	45327		Pathogenic			44	EO	Over_35	26.8	OW	6.9	0	BRBPR	0.1234	IMPACT410	0	1		MSS
Colorectal Cancer (MSK, JNCI 2021)	P-0011446-T01-IM5	Colorectal Cancer	Mucinous Adenocarcinoma of the Colon and Rectum	KRAS	G12D	OncoKB: Oncogenic, level_3b, level_r1;CIViC: diagnosticCount: 2, predictiveCount: 51, prognosticCount: 6, predisposingCount: 0, oncogenicCount: 0, functionalCount: 0;MyCancerGenome: present;CancerHotspot: yes;3DHotspot: yes			MutationAssessor: impact: medium, score: 2.685;SIFT: impact: deleterious, score: 0;Polyphen-2: impact: benign, score: 0.303	Missense_Mutation	SNP	Diploid	25876	SOMATIC	Unknown	MSKCC	12	25398284	25398284	C	T	12:g.25398284C>T	ENST00000311936.3:c.35G>A	0.32		272	591		647	41	45327		Pathogenic			74	AO	AO	32.1	OB	40.3	1	incidentally found on colonoscopy	0.0217	IMPACT410	1			MSI
Colorectal Cancer (MSK, JNCI 2021)	P-0012877-T01-IM5	Colorectal Cancer	Colon Adenocarcinoma	KRAS	G12D	OncoKB: Oncogenic, level_3b, level_r1;CIViC: diagnosticCount: 2, predictiveCount: 51, prognosticCount: 6, predisposingCount: 0, oncogenicCount: 0, functionalCount: 0;MyCancerGenome: present;CancerHotspot: yes;3DHotspot: yes			MutationAssessor: impact: medium, score: 2.685;SIFT: impact: deleterious, score: 0;Polyphen-2: impact: benign, score: 0.303	Missense_Mutation	SNP	Diploid	25876	SOMATIC	Unknown	MSKCC	12	25398284	25398284	C	T	12:g.25398284C>T	ENST00000311936.3:c.35G>A	0.79	0.0019	457	121	1	531	10	45327		Pathogenic			75	AO	AO	28.9	OW	9.8	0	SOB, anemia	0.3843	IMPACT410	0			MSS
Colorectal Cancer (MSK, JNCI 2021)	P-0012965-T01-IM5	Colorectal Cancer	Rectal Adenocarcinoma	KRAS	G12D	OncoKB: Oncogenic, level_3b, level_r1;CIViC: diagnosticCount: 2, predictiveCount: 51, prognosticCount: 6, predisposingCount: 0, oncogenicCount: 0, functionalCount: 0;MyCancerGenome: present;CancerHotspot: yes;3DHotspot: yes			MutationAssessor: impact: medium, score: 2.685;SIFT: impact: deleterious, score: 0;Polyphen-2: impact: benign, score: 0.303	Missense_Mutation	SNP	Diploid	25876	SOMATIC	Unknown	MSKCC	12	25398284	25398284	C	T	12:g.25398284C>T	ENST00000311936.3:c.35G>A	0.39		197	308		415	6	45327		Pathogenic			77	AO	AO	24	NW	5.9	0	abdominal pain	0.0605	IMPACT410	1			MSS
Colorectal Cancer (MSK, JNCI 2021)	P-0013263-T01-IM5	Colorectal Cancer	Colon Adenocarcinoma	KRAS	G12D	OncoKB: Oncogenic, level_3b, level_r1;CIViC: diagnosticCount: 2, predictiveCount: 51, prognosticCount: 6, predisposingCount: 0, oncogenicCount: 0, functionalCount: 0;MyCancerGenome: present;CancerHotspot: yes;3DHotspot: yes			MutationAssessor: impact: medium, score: 2.685;SIFT: impact: deleterious, score: 0;Polyphen-2: impact: benign, score: 0.303	Missense_Mutation	SNP	Diploid	25876	SOMATIC	Unknown	MSKCC	12	25398284	25398284	C	T	12:g.25398284C>T	ENST00000311936.3:c.35G>A	0.3		340	789		601	9	45327		Pathogenic			45	EO	Over_35	28.4	OW	8.9	0	BRBPR	0.0178	IMPACT410	0	0		MSS
Colorectal Cancer (MSK, JNCI 2021)	P-0013822-T02-IM6	Colorectal Cancer	Colon Adenocarcinoma	KRAS	G12D	OncoKB: Oncogenic, level_3b, level_r1;CIViC: diagnosticCount: 2, predictiveCount: 51, prognosticCount: 6, predisposingCount: 0, oncogenicCount: 0, functionalCount: 0;MyCancerGenome: present;CancerHotspot: yes;3DHotspot: yes			MutationAssessor: impact: medium, score: 2.685;SIFT: impact: deleterious, score: 0;Polyphen-2: impact: benign, score: 0.303	Missense_Mutation	SNP	Diploid	25876	SOMATIC	Unknown	MSKCC	12	25398284	25398284	C	T	12:g.25398284C>T	ENST00000311936.3:c.35G>A	0.21		165	615		661	7	45327		Pathogenic			74	AO	AO	24.6	NW	6.1	1	incidentally found on colonoscopy	0.4041	IMPACT468	1	0		MSS
Colorectal Cancer (MSK, JNCI 2021)	P-0014168-T01-IM5	Colorectal Cancer	Colon Adenocarcinoma	KRAS	G12D	OncoKB: Oncogenic, level_3b, level_r1;CIViC: diagnosticCount: 2, predictiveCount: 51, prognosticCount: 6, predisposingCount: 0, oncogenicCount: 0, functionalCount: 0;MyCancerGenome: present;CancerHotspot: yes;3DHotspot: yes			MutationAssessor: impact: medium, score: 2.685;SIFT: impact: deleterious, score: 0;Polyphen-2: impact: benign, score: 0.303	Missense_Mutation	SNP	Diploid	25876	SOMATIC	Unknown	MSKCC	12	25398284	25398284	C	T	12:g.25398284C>T	ENST00000311936.3:c.35G>A	0.26		268	763		470	7	45327		Pathogenic			45	EO	Over_35	23.4	NW	6.9	1	OTHER	0.0626	IMPACT410	0	1		MSS
Colorectal Cancer (MSK, JNCI 2021)	P-0014182-T01-IM6	Colorectal Cancer	Colon Adenocarcinoma	KRAS	G12D	OncoKB: Oncogenic, level_3b, level_r1;CIViC: diagnosticCount: 2, predictiveCount: 51, prognosticCount: 6, predisposingCount: 0, oncogenicCount: 0, functionalCount: 0;MyCancerGenome: present;CancerHotspot: yes;3DHotspot: yes			MutationAssessor: impact: medium, score: 2.685;SIFT: impact: deleterious, score: 0;Polyphen-2: impact: benign, score: 0.303	Missense_Mutation	SNP	Diploid	25876	SOMATIC	Unknown	MSKCC	12	25398284	25398284	C	T	12:g.25398284C>T	ENST00000311936.3:c.35G>A	0.13	0.0019	74	490	1	534	9	45327		Pathogenic			62	AO	AO	25.9	OW	7.9	0	incidentally found on colonoscopy	0.1274	IMPACT468	1	1		MSS
Colorectal Cancer (MSK, JNCI 2021)	P-0015121-T01-IM6	Colorectal Cancer	Colon Adenocarcinoma	KRAS	G12D	OncoKB: Oncogenic, level_3b, level_r1;CIViC: diagnosticCount: 2, predictiveCount: 51, prognosticCount: 6, predisposingCount: 0, oncogenicCount: 0, functionalCount: 0;MyCancerGenome: present;CancerHotspot: yes;3DHotspot: yes			MutationAssessor: impact: medium, score: 2.685;SIFT: impact: deleterious, score: 0;Polyphen-2: impact: benign, score: 0.303	Missense_Mutation	SNP	Diploid	25876	SOMATIC	Unknown	MSKCC	12	25398284	25398284	C	T	12:g.25398284C>T	ENST00000311936.3:c.35G>A	0.29		307	737		486	5	45327		Pathogenic			32	EO	Under_35	27.8	OW	4.4	0	BRBPR	0.359	IMPACT468	0	1		MSS
Colorectal Cancer (MSK, JNCI 2021)	P-0015416-T01-IM6	Colorectal Cancer	Colon Adenocarcinoma	KRAS	G12D	OncoKB: Oncogenic, level_3b, level_r1;CIViC: diagnosticCount: 2, predictiveCount: 51, prognosticCount: 6, predisposingCount: 0, oncogenicCount: 0, functionalCount: 0;MyCancerGenome: present;CancerHotspot: yes;3DHotspot: yes			MutationAssessor: impact: medium, score: 2.685;SIFT: impact: deleterious, score: 0;Polyphen-2: impact: benign, score: 0.303	Missense_Mutation	SNP	Diploid	25876	SOMATIC	Unknown	MSKCC	12	25398284	25398284	C	T	12:g.25398284C>T	ENST00000311936.3:c.35G>A	0.13		131	878		552	120	45327		Pathogenic			32	EO	Under_35			105.3	0		0.033	IMPACT468	0
Colorectal Cancer (MSK, JNCI 2021)	P-0016206-T01-IM6	Colorectal Cancer	Colon Adenocarcinoma	KRAS	G12D	OncoKB: Oncogenic, level_3b, level_r1;CIViC: diagnosticCount: 2, predictiveCount: 51, prognosticCount: 6, predisposingCount: 0, oncogenicCount: 0, functionalCount: 0;MyCancerGenome: present;CancerHotspot: yes;3DHotspot: yes			MutationAssessor: impact: medium, score: 2.685;SIFT: impact: deleterious, score: 0;Polyphen-2: impact: benign, score: 0.303	Missense_Mutation	SNP	Diploid	25876	SOMATIC	Unknown	MSKCC	12	25398284	25398284	C	T	12:g.25398284C>T	ENST00000311936.3:c.35G>A	0.15		172	939		588	3	45327		Pathogenic			38	EO	Over_35	28.4	OW	2.6	0	ABDOMINAL PAIN, BLOATING/ABDOMINAL GIRTH/PELVIC PRESSURE,PAIN	0.1391	IMPACT468	0	1		MSS
Colorectal Cancer (MSK, JNCI 2021)	P-0016266-T01-IM6	Colorectal Cancer	Colon Adenocarcinoma	KRAS	G12D	OncoKB: Oncogenic, level_3b, level_r1;CIViC: diagnosticCount: 2, predictiveCount: 51, prognosticCount: 6, predisposingCount: 0, oncogenicCount: 0, functionalCount: 0;MyCancerGenome: present;CancerHotspot: yes;3DHotspot: yes			MutationAssessor: impact: medium, score: 2.685;SIFT: impact: deleterious, score: 0;Polyphen-2: impact: benign, score: 0.303	Missense_Mutation	SNP	Diploid	25876	SOMATIC	Unknown	MSKCC	12	25398284	25398284	C	T	12:g.25398284C>T	ENST00000311936.3:c.35G>A	0.53		323	292		1085	7	45327		Pathogenic			38	EO	Over_35	34.9	OB	6.1	0	SCREENING COLONOSCOPY	0.2437	IMPACT468	0	1		MSS
Colorectal Cancer (MSK, JNCI 2021)	P-0016704-T01-IM6	Colorectal Cancer	Colon Adenocarcinoma	KRAS	G12D	OncoKB: Oncogenic, level_3b, level_r1;CIViC: diagnosticCount: 2, predictiveCount: 51, prognosticCount: 6, predisposingCount: 0, oncogenicCount: 0, functionalCount: 0;MyCancerGenome: present;CancerHotspot: yes;3DHotspot: yes			MutationAssessor: impact: medium, score: 2.685;SIFT: impact: deleterious, score: 0;Polyphen-2: impact: benign, score: 0.303	Missense_Mutation	SNP	Diploid	25876	SOMATIC	Unknown	MSKCC	12	25398284	25398284	C	T	12:g.25398284C>T	ENST00000311936.3:c.35G>A	0.36		363	656		410	14	45327		Pathogenic			44	EO	Over_35	28.1	OW	12.3	0	ABDOMINAL PAIN, BLOATING/ABDOMINAL GIRTH/PELVIC PRESSURE,PAIN	0.1202	IMPACT468	0	0		MSS
Colorectal Cancer (MSK, JNCI 2021)	P-0017986-T02-IM6	Colorectal Cancer	Rectal Adenocarcinoma	KRAS	G12D	OncoKB: Oncogenic, level_3b, level_r1;CIViC: diagnosticCount: 2, predictiveCount: 51, prognosticCount: 6, predisposingCount: 0, oncogenicCount: 0, functionalCount: 0;MyCancerGenome: present;CancerHotspot: yes;3DHotspot: yes			MutationAssessor: impact: medium, score: 2.685;SIFT: impact: deleterious, score: 0;Polyphen-2: impact: benign, score: 0.303	Missense_Mutation	SNP	Diploid	25876	SOMATIC	Unknown	MSKCC	12	25398284	25398284	C	T	12:g.25398284C>T	ENST00000311936.3:c.35G>A	0.23		167	555		589	72	45327		Pathogenic			32	EO	Under_35			63.2			0.2032	IMPACT468
Colorectal Cancer (MSK, JNCI 2021)	P-0018352-T01-IM6	Colorectal Cancer	Rectal Adenocarcinoma	KRAS	G12D	OncoKB: Oncogenic, level_3b, level_r1;CIViC: diagnosticCount: 2, predictiveCount: 51, prognosticCount: 6, predisposingCount: 0, oncogenicCount: 0, functionalCount: 0;MyCancerGenome: present;CancerHotspot: yes;3DHotspot: yes			MutationAssessor: impact: medium, score: 2.685;SIFT: impact: deleterious, score: 0;Polyphen-2: impact: benign, score: 0.303	Missense_Mutation	SNP	Diploid	25876	SOMATIC	Unknown	MSKCC	12	25398284	25398284	C	T	12:g.25398284C>T	ENST00000311936.3:c.35G>A	0.07	0.0022	33	450	2	903	4	45327		Pathogenic			33	EO	Under_35	16.1	UW	3.5		CHANGE IN BOWEL HABITS	0.0115	IMPACT468		1		MSS
Colorectal Cancer (MSK, JNCI 2021)	P-0019142-T01-IM6	Colorectal Cancer	Rectal Adenocarcinoma	KRAS	G12D	OncoKB: Oncogenic, level_3b, level_r1;CIViC: diagnosticCount: 2, predictiveCount: 51, prognosticCount: 6, predisposingCount: 0, oncogenicCount: 0, functionalCount: 0;MyCancerGenome: present;CancerHotspot: yes;3DHotspot: yes			MutationAssessor: impact: medium, score: 2.685;SIFT: impact: deleterious, score: 0;Polyphen-2: impact: benign, score: 0.303	Missense_Mutation	SNP	Diploid	25876	SOMATIC	Unknown	MSKCC	12	25398284	25398284	C	T	12:g.25398284C>T	ENST00000311936.3:c.35G>A	0.13	0.0011	120	778	1	874	4	45327		Pathogenic			27	EO	Under_35	26.6	OW	3.5	0	OTHER	0.0912	IMPACT468	0	1		MSS
Colorectal Cancer (MSK, JNCI 2021)	P-0019587-T01-IM6	Colorectal Cancer	Colon Adenocarcinoma	KRAS	G12D	OncoKB: Oncogenic, level_3b, level_r1;CIViC: diagnosticCount: 2, predictiveCount: 51, prognosticCount: 6, predisposingCount: 0, oncogenicCount: 0, functionalCount: 0;MyCancerGenome: present;CancerHotspot: yes;3DHotspot: yes			MutationAssessor: impact: medium, score: 2.685;SIFT: impact: deleterious, score: 0;Polyphen-2: impact: benign, score: 0.303	Missense_Mutation	SNP	Diploid	25876	SOMATIC	Unknown	MSKCC	12	25398284	25398284	C	T	12:g.25398284C>T	ENST00000311936.3:c.35G>A	0.28		200	516		784	11	45327		Pathogenic			40	EO	Over_35	29.1	OW	9.7	0	ABDOMINAL PAIN, BLOATING/ABDOMINAL GIRTH/PELVIC PRESSURE,PAIN	0	IMPACT468	0			MSS
Colorectal Cancer (MSK, JNCI 2021)	P-0019637-T01-IM6	Colorectal Cancer	Colon Adenocarcinoma	KRAS	G12D	OncoKB: Oncogenic, level_3b, level_r1;CIViC: diagnosticCount: 2, predictiveCount: 51, prognosticCount: 6, predisposingCount: 0, oncogenicCount: 0, functionalCount: 0;MyCancerGenome: present;CancerHotspot: yes;3DHotspot: yes			MutationAssessor: impact: medium, score: 2.685;SIFT: impact: deleterious, score: 0;Polyphen-2: impact: benign, score: 0.303	Missense_Mutation	SNP	Diploid	25876	SOMATIC	Unknown	MSKCC	12	25398284	25398284	C	T	12:g.25398284C>T	ENST00000311936.3:c.35G>A	0.29	0.001	218	527	1	990	8	45327		Pathogenic			37	EO	Over_35	33.3	OB	7	0	BRBPR	0.2865	IMPACT468	0	0		MSS
Colorectal Cancer (MSK, JNCI 2021)	P-0020431-T01-IM6	Colorectal Cancer	Colon Adenocarcinoma	KRAS	G12D	OncoKB: Oncogenic, level_3b, level_r1;CIViC: diagnosticCount: 2, predictiveCount: 51, prognosticCount: 6, predisposingCount: 0, oncogenicCount: 0, functionalCount: 0;MyCancerGenome: present;CancerHotspot: yes;3DHotspot: yes			MutationAssessor: impact: medium, score: 2.685;SIFT: impact: deleterious, score: 0;Polyphen-2: impact: benign, score: 0.303	Missense_Mutation	SNP	Diploid	25876	SOMATIC	Unknown	MSKCC	12	25398284	25398284	C	T	12:g.25398284C>T	ENST00000311936.3:c.35G>A	0.08		43	466		633	36	45327		Pathogenic			39	EO	Over_35			31.6	0		0.0026	IMPACT468	0
Colorectal Cancer (MSK, JNCI 2021)	P-0020578-T01-IM6	Colorectal Cancer	Colon Adenocarcinoma	KRAS	G12D	OncoKB: Oncogenic, level_3b, level_r1;CIViC: diagnosticCount: 2, predictiveCount: 51, prognosticCount: 6, predisposingCount: 0, oncogenicCount: 0, functionalCount: 0;MyCancerGenome: present;CancerHotspot: yes;3DHotspot: yes			MutationAssessor: impact: medium, score: 2.685;SIFT: impact: deleterious, score: 0;Polyphen-2: impact: benign, score: 0.303	Missense_Mutation	SNP	Diploid	25876	SOMATIC	Unknown	MSKCC	12	25398284	25398284	C	T	12:g.25398284C>T	ENST00000311936.3:c.35G>A	0.32		276	584		962	8	45327		Pathogenic			42	EO	Over_35	28.4	OW	7	0	CHANGE IN BOWEL HABITS	0.1624	IMPACT468	1	0		MSS
Colorectal Cancer (MSK, JNCI 2021)	P-0025161-T01-IM6	Colorectal Cancer	Colorectal Adenocarcinoma	KRAS	G12D	OncoKB: Oncogenic, level_3b, level_r1;CIViC: diagnosticCount: 2, predictiveCount: 51, prognosticCount: 6, predisposingCount: 0, oncogenicCount: 0, functionalCount: 0;MyCancerGenome: present;CancerHotspot: yes;3DHotspot: yes			MutationAssessor: impact: medium, score: 2.685;SIFT: impact: deleterious, score: 0;Polyphen-2: impact: benign, score: 0.303	Missense_Mutation	SNP	Diploid	25876	SOMATIC	Unknown	MSKCC	12	25398284	25398284	C	T	12:g.25398284C>T	ENST00000311936.3:c.35G>A	0.23		184	624		624	11	45327		Pathogenic			40	EO	Over_35	25.8	OW	9.7	0	ABDOMINAL PAIN, BLOATING/ABDOMINAL GIRTH/PELVIC PRESSURE,PAIN; WEIGHT LOSS	0.1644	IMPACT468	0	1		MSS
Colorectal Cancer (MSK, JNCI 2021)	P-0025695-T01-IM6	Colorectal Cancer	Colon Adenocarcinoma	KRAS	G12D	OncoKB: Oncogenic, level_3b, level_r1;CIViC: diagnosticCount: 2, predictiveCount: 51, prognosticCount: 6, predisposingCount: 0, oncogenicCount: 0, functionalCount: 0;MyCancerGenome: present;CancerHotspot: yes;3DHotspot: yes			MutationAssessor: impact: medium, score: 2.685;SIFT: impact: deleterious, score: 0;Polyphen-2: impact: benign, score: 0.303	Missense_Mutation	SNP	Diploid	25876	SOMATIC	Unknown	MSKCC	12	25398284	25398284	C	T	12:g.25398284C>T	ENST00000311936.3:c.35G>A	0.22		114	411		519	66	45327		Pathogenic			38	EO	Over_35			57.9			0.0146	IMPACT468
Colorectal Cancer (MSK, JNCI 2021)	P-0026994-T01-IM6	Colorectal Cancer	Colon Adenocarcinoma	KRAS	G12D	OncoKB: Oncogenic, level_3b, level_r1;CIViC: diagnosticCount: 2, predictiveCount: 51, prognosticCount: 6, predisposingCount: 0, oncogenicCount: 0, functionalCount: 0;MyCancerGenome: present;CancerHotspot: yes;3DHotspot: yes			MutationAssessor: impact: medium, score: 2.685;SIFT: impact: deleterious, score: 0;Polyphen-2: impact: benign, score: 0.303	Missense_Mutation	SNP	Diploid	25876	SOMATIC	Unknown	MSKCC	12	25398284	25398284	C	T	12:g.25398284C>T	ENST00000311936.3:c.35G>A	0.33		292	593		409	22	45327		Pathogenic			42	EO	Over_35	25.1	OW	19.3	0	ABDOMINAL PAIN, BLOATING/ABDOMINAL GIRTH/PELVIC PRESSURE,PAIN	0.311	IMPACT468	0	1		MSS
Colorectal Cancer (MSK, JNCI 2021)	P-0027508-T01-IM6	Colorectal Cancer	Rectal Adenocarcinoma	KRAS	G12D	OncoKB: Oncogenic, level_3b, level_r1;CIViC: diagnosticCount: 2, predictiveCount: 51, prognosticCount: 6, predisposingCount: 0, oncogenicCount: 0, functionalCount: 0;MyCancerGenome: present;CancerHotspot: yes;3DHotspot: yes			MutationAssessor: impact: medium, score: 2.685;SIFT: impact: deleterious, score: 0;Polyphen-2: impact: benign, score: 0.303	Missense_Mutation	SNP	Diploid	25876	SOMATIC	Unknown	MSKCC	12	25398284	25398284	C	T	12:g.25398284C>T	ENST00000311936.3:c.35G>A	0.18		121	551		367	6	45327		Pathogenic			48	EO	Over_35	31.3	OB	5.3	0	ABDOMINAL PAIN, BLOATING/ABDOMINAL GIRTH/PELVIC PRESSURE,PAIN; FATIGUE	0.2024	IMPACT468	0			MSS
Colorectal Cancer (MSK, JNCI 2021)	P-0028303-T01-IM6	Colorectal Cancer	Rectal Adenocarcinoma	KRAS	G12D	OncoKB: Oncogenic, level_3b, level_r1;CIViC: diagnosticCount: 2, predictiveCount: 51, prognosticCount: 6, predisposingCount: 0, oncogenicCount: 0, functionalCount: 0;MyCancerGenome: present;CancerHotspot: yes;3DHotspot: yes			MutationAssessor: impact: medium, score: 2.685;SIFT: impact: deleterious, score: 0;Polyphen-2: impact: benign, score: 0.303	Missense_Mutation	SNP	Diploid	25876	SOMATIC	Unknown	MSKCC	12	25398284	25398284	C	T	12:g.25398284C>T	ENST00000311936.3:c.35G>A	0.27		147	404		505	7	45327		Pathogenic			31	EO	Under_35	35	OB	6.1	0	BRBPR; CHANGE IN BOWEL HABITS	0.1244	IMPACT468	0	1		MSS
Colorectal Cancer (MSK, JNCI 2021)	P-0029767-T01-IM6	Colorectal Cancer	Rectal Adenocarcinoma	KRAS	G12D	OncoKB: Oncogenic, level_3b, level_r1;CIViC: diagnosticCount: 2, predictiveCount: 51, prognosticCount: 6, predisposingCount: 0, oncogenicCount: 0, functionalCount: 0;MyCancerGenome: present;CancerHotspot: yes;3DHotspot: yes			MutationAssessor: impact: medium, score: 2.685;SIFT: impact: deleterious, score: 0;Polyphen-2: impact: benign, score: 0.303	Missense_Mutation	SNP	Diploid	25876	SOMATIC	Unknown	MSKCC	12	25398284	25398284	C	T	12:g.25398284C>T	ENST00000311936.3:c.35G>A	0.17		94	465		473	4	45327		Pathogenic			35	EO	Under_35			3.5			0.0633	IMPACT468
Colorectal Cancer (MSK, JNCI 2021)	P-0030701-T01-IM6	Colorectal Cancer	Rectal Adenocarcinoma	KRAS	G12D	OncoKB: Oncogenic, level_3b, level_r1;CIViC: diagnosticCount: 2, predictiveCount: 51, prognosticCount: 6, predisposingCount: 0, oncogenicCount: 0, functionalCount: 0;MyCancerGenome: present;CancerHotspot: yes;3DHotspot: yes			MutationAssessor: impact: medium, score: 2.685;SIFT: impact: deleterious, score: 0;Polyphen-2: impact: benign, score: 0.303	Missense_Mutation	SNP	Diploid	25876	SOMATIC	Unknown	MSKCC	12	25398284	25398284	C	T	12:g.25398284C>T	ENST00000311936.3:c.35G>A	0.35		194	365		469	9	45327		Pathogenic			46	EO	Over_35	20.7	NW	8.8	0	BRBPR	0.3157	IMPACT468	0			MSS
Colorectal Cancer (MSK, JNCI 2021)	P-0030768-T01-IM6	Colorectal Cancer	Colon Adenocarcinoma	KRAS	G12D	OncoKB: Oncogenic, level_3b, level_r1;CIViC: diagnosticCount: 2, predictiveCount: 51, prognosticCount: 6, predisposingCount: 0, oncogenicCount: 0, functionalCount: 0;MyCancerGenome: present;CancerHotspot: yes;3DHotspot: yes			MutationAssessor: impact: medium, score: 2.685;SIFT: impact: deleterious, score: 0;Polyphen-2: impact: benign, score: 0.303	Missense_Mutation	SNP	Diploid	25876	SOMATIC	Unknown	MSKCC	12	25398284	25398284	C	T	12:g.25398284C>T	ENST00000311936.3:c.35G>A	0.35		167	317		381	6	45327		Pathogenic			40	EO	Over_35	33.2	OB	5.3	0	ABDOMINAL PAIN, BLOATING/ABDOMINAL GIRTH/PELVIC PRESSURE,PAIN; BRBPR; CHANGE IN BOWEL HABITS	0.199	IMPACT468	0	1		MSS
Colorectal Cancer (MSK, JNCI 2021)	P-0031527-T01-IM6	Colorectal Cancer	Colorectal Adenocarcinoma	KRAS	G12D	OncoKB: Oncogenic, level_3b, level_r1;CIViC: diagnosticCount: 2, predictiveCount: 51, prognosticCount: 6, predisposingCount: 0, oncogenicCount: 0, functionalCount: 0;MyCancerGenome: present;CancerHotspot: yes;3DHotspot: yes			MutationAssessor: impact: medium, score: 2.685;SIFT: impact: deleterious, score: 0;Polyphen-2: impact: benign, score: 0.303	Missense_Mutation	SNP	Diploid	25876	SOMATIC	Unknown	MSKCC	12	25398284	25398284	C	T	12:g.25398284C>T	ENST00000311936.3:c.35G>A	0.26		158	445		411	6	45327		Pathogenic			47	EO	Over_35	25.9	OW	5.3	0	BRBPR	0.0474	IMPACT468	1			MSS
Colorectal Cancer (MSK, JNCI 2021)	P-0032698-T01-IM6	Colorectal Cancer	Colon Adenocarcinoma	KRAS	G12D	OncoKB: Oncogenic, level_3b, level_r1;CIViC: diagnosticCount: 2, predictiveCount: 51, prognosticCount: 6, predisposingCount: 0, oncogenicCount: 0, functionalCount: 0;MyCancerGenome: present;CancerHotspot: yes;3DHotspot: yes			MutationAssessor: impact: medium, score: 2.685;SIFT: impact: deleterious, score: 0;Polyphen-2: impact: benign, score: 0.303	Missense_Mutation	SNP	Diploid	25876	SOMATIC	Unknown	MSKCC	12	25398284	25398284	C	T	12:g.25398284C>T	ENST00000311936.3:c.35G>A	0.12		59	432		472	67	45327		Pathogenic			29	EO	Under_35	18.7	NW	58.8	0	ABDOMINAL PAIN, BLOATING/ABDOMINAL GIRTH/PELVIC PRESSURE,PAIN	0	IMPACT468	0			MSI
Colorectal Cancer (MSK, JNCI 2021)	P-0033030-T01-IM6	Colorectal Cancer	Colorectal Adenocarcinoma	KRAS	G12D	OncoKB: Oncogenic, level_3b, level_r1;CIViC: diagnosticCount: 2, predictiveCount: 51, prognosticCount: 6, predisposingCount: 0, oncogenicCount: 0, functionalCount: 0;MyCancerGenome: present;CancerHotspot: yes;3DHotspot: yes			MutationAssessor: impact: medium, score: 2.685;SIFT: impact: deleterious, score: 0;Polyphen-2: impact: benign, score: 0.303	Missense_Mutation	SNP	Diploid	25876	SOMATIC	Unknown	MSKCC	12	25398284	25398284	C	T	12:g.25398284C>T	ENST00000311936.3:c.35G>A	0.13		75	497		422	4	45327		Pathogenic			48	EO	Over_35	33.4	OB	3.5	0	ABDOMINAL PAIN, BLOATING/ABDOMINAL GIRTH/PELVIC PRESSURE,PAIN; weight loss	0.0356	IMPACT468	1	1		MSS
Colorectal Cancer (MSK, JNCI 2021)	P-0033991-T01-IM6	Colorectal Cancer	Rectal Adenocarcinoma	KRAS	G12D	OncoKB: Oncogenic, level_3b, level_r1;CIViC: diagnosticCount: 2, predictiveCount: 51, prognosticCount: 6, predisposingCount: 0, oncogenicCount: 0, functionalCount: 0;MyCancerGenome: present;CancerHotspot: yes;3DHotspot: yes			MutationAssessor: impact: medium, score: 2.685;SIFT: impact: deleterious, score: 0;Polyphen-2: impact: benign, score: 0.303	Missense_Mutation	SNP	Diploid	25876	SOMATIC	Unknown	MSKCC	12	25398284	25398284	C	T	12:g.25398284C>T	ENST00000311936.3:c.35G>A	0.26		230	648		621	5	45327		Pathogenic			40	EO	Over_35	25.4	OW	4.4	0	BRBPR	0.1169	IMPACT468	0			MSS
Colorectal Cancer (MSK, JNCI 2021)	P-0034026-T01-IM6	Colorectal Cancer	Colorectal Adenocarcinoma	KRAS	G12D	OncoKB: Oncogenic, level_3b, level_r1;CIViC: diagnosticCount: 2, predictiveCount: 51, prognosticCount: 6, predisposingCount: 0, oncogenicCount: 0, functionalCount: 0;MyCancerGenome: present;CancerHotspot: yes;3DHotspot: yes			MutationAssessor: impact: medium, score: 2.685;SIFT: impact: deleterious, score: 0;Polyphen-2: impact: benign, score: 0.303	Missense_Mutation	SNP	Diploid	25876	SOMATIC	Unknown	MSKCC	12	25398284	25398284	C	T	12:g.25398284C>T	ENST00000311936.3:c.35G>A	0.27		103	277		429	5	45327		Pathogenic			35	EO	Under_35	25.8	OW	4.4	0	CHANGE IN BOWEL HABITS; BRBPR	0.0426	IMPACT468	0	1		MSS
Colorectal Cancer (MSK, JNCI 2021)	P-0034167-T01-IM6	Colorectal Cancer	Colon Adenocarcinoma	KRAS	G12D	OncoKB: Oncogenic, level_3b, level_r1;CIViC: diagnosticCount: 2, predictiveCount: 51, prognosticCount: 6, predisposingCount: 0, oncogenicCount: 0, functionalCount: 0;MyCancerGenome: present;CancerHotspot: yes;3DHotspot: yes			MutationAssessor: impact: medium, score: 2.685;SIFT: impact: deleterious, score: 0;Polyphen-2: impact: benign, score: 0.303	Missense_Mutation	SNP	Diploid	25876	SOMATIC	Unknown	MSKCC	12	25398284	25398284	C	T	12:g.25398284C>T	ENST00000311936.3:c.35G>A	0.32		172	367		634	7	45327		Pathogenic			34	EO	Under_35	19.4	NW	6.1	0	BRBPR; ABDOMINAL PAIN, BLOATING/ABDOMINAL GIRTH/PELVIC PRESSURE,PAIN	0.059	IMPACT468	0	1		MSS
Colorectal Cancer (MSK, JNCI 2021)	P-0034411-T01-IM6	Colorectal Cancer	Rectal Adenocarcinoma	KRAS	G12D	OncoKB: Oncogenic, level_3b, level_r1;CIViC: diagnosticCount: 2, predictiveCount: 51, prognosticCount: 6, predisposingCount: 0, oncogenicCount: 0, functionalCount: 0;MyCancerGenome: present;CancerHotspot: yes;3DHotspot: yes			MutationAssessor: impact: medium, score: 2.685;SIFT: impact: deleterious, score: 0;Polyphen-2: impact: benign, score: 0.303	Missense_Mutation	SNP	Diploid	25876	SOMATIC	Unknown	MSKCC	12	25398284	25398284	C	T	12:g.25398284C>T	ENST00000311936.3:c.35G>A	0.48		373	402		468	9	45327		Pathogenic			33	EO	Under_35	34.9	OB	7.9	0	BRBPR	0.3099	IMPACT468	0			MSS
Colorectal Cancer (MSK, JNCI 2021)	P-0037410-T01-IM6	Colorectal Cancer	Colon Adenocarcinoma	KRAS	G12D	OncoKB: Oncogenic, level_3b, level_r1;CIViC: diagnosticCount: 2, predictiveCount: 51, prognosticCount: 6, predisposingCount: 0, oncogenicCount: 0, functionalCount: 0;MyCancerGenome: present;CancerHotspot: yes;3DHotspot: yes			MutationAssessor: impact: medium, score: 2.685;SIFT: impact: deleterious, score: 0;Polyphen-2: impact: benign, score: 0.303	Missense_Mutation	SNP	Diploid	25876	SOMATIC	Unknown	MSKCC	12	25398284	25398284	C	T	12:g.25398284C>T	ENST00000311936.3:c.35G>A	0.12		51	382		450	117	45327		Pathogenic			48	EO	Over_35	36.1	OB	102.7	0	BRBPR	0.0336	IMPACT468	0			MSI
Colorectal Cancer (MSK, JNCI 2021)	P-0037482-T01-IM6	Colorectal Cancer	Colon Adenocarcinoma	KRAS	G12D	OncoKB: Oncogenic, level_3b, level_r1;CIViC: diagnosticCount: 2, predictiveCount: 51, prognosticCount: 6, predisposingCount: 0, oncogenicCount: 0, functionalCount: 0;MyCancerGenome: present;CancerHotspot: yes;3DHotspot: yes			MutationAssessor: impact: medium, score: 2.685;SIFT: impact: deleterious, score: 0;Polyphen-2: impact: benign, score: 0.303	Missense_Mutation	SNP	Diploid	25876	SOMATIC	Unknown	MSKCC	12	25398284	25398284	C	T	12:g.25398284C>T	ENST00000311936.3:c.35G>A	0.02		9	387		437	4	45327		Pathogenic			33	EO	Under_35	21	NW	3.5	0	OTHER	0.485	IMPACT468	0	1		MSS
Colorectal Cancer (MSK, JNCI 2021)	P-0038168-T01-IM6	Colorectal Cancer	Colorectal Adenocarcinoma	KRAS	G12D	OncoKB: Oncogenic, level_3b, level_r1;CIViC: diagnosticCount: 2, predictiveCount: 51, prognosticCount: 6, predisposingCount: 0, oncogenicCount: 0, functionalCount: 0;MyCancerGenome: present;CancerHotspot: yes;3DHotspot: yes			MutationAssessor: impact: medium, score: 2.685;SIFT: impact: deleterious, score: 0;Polyphen-2: impact: benign, score: 0.303	Missense_Mutation	SNP	Diploid	25876	SOMATIC	Unknown	MSKCC	12	25398284	25398284	C	T	12:g.25398284C>T	ENST00000311936.3:c.35G>A	0.32		125	264		384	10	45327		Pathogenic			38	EO	Over_35	26.1	OW	8.8	0	BRBPR	0.2156	IMPACT468	0			MSS
Colorectal Cancer (MSK, JNCI 2021)	P-0038184-T01-IM6	Colorectal Cancer	Colorectal Adenocarcinoma	KRAS	G12D	OncoKB: Oncogenic, level_3b, level_r1;CIViC: diagnosticCount: 2, predictiveCount: 51, prognosticCount: 6, predisposingCount: 0, oncogenicCount: 0, functionalCount: 0;MyCancerGenome: present;CancerHotspot: yes;3DHotspot: yes			MutationAssessor: impact: medium, score: 2.685;SIFT: impact: deleterious, score: 0;Polyphen-2: impact: benign, score: 0.303	Missense_Mutation	SNP	Diploid	25876	SOMATIC	Unknown	MSKCC	12	25398284	25398284	C	T	12:g.25398284C>T	ENST00000311936.3:c.35G>A	0.22		114	405		578	6	45327		Pathogenic			36	EO	Over_35	21.8	NW	5.3	0	ABDOMINAL PAIN, BLOATING/ABDOMINAL GIRTH/PELVIC PRESSURE,PAIN; BRBPR; WEIGHT LOSS	0.1268	IMPACT468	0	0		MSS
Colorectal Cancer (MSK, JNCI 2021)	P-0039443-T01-IM6	Colorectal Cancer	Colon Adenocarcinoma	KRAS	G12D	OncoKB: Oncogenic, level_3b, level_r1;CIViC: diagnosticCount: 2, predictiveCount: 51, prognosticCount: 6, predisposingCount: 0, oncogenicCount: 0, functionalCount: 0;MyCancerGenome: present;CancerHotspot: yes;3DHotspot: yes			MutationAssessor: impact: medium, score: 2.685;SIFT: impact: deleterious, score: 0;Polyphen-2: impact: benign, score: 0.303	Missense_Mutation	SNP	Diploid	25876	SOMATIC	Unknown	MSKCC	12	25398284	25398284	C	T	12:g.25398284C>T	ENST00000311936.3:c.35G>A	0.14		77	476		485	67	45327		Pathogenic			41	EO	Over_35	28.5	NW	59.7		BRBPR	0	IMPACT468
Colorectal Cancer (MSK, JNCI 2021)	P-0040062-T01-IM6	Colorectal Cancer	Colorectal Adenocarcinoma	KRAS	G12D	OncoKB: Oncogenic, level_3b, level_r1;CIViC: diagnosticCount: 2, predictiveCount: 51, prognosticCount: 6, predisposingCount: 0, oncogenicCount: 0, functionalCount: 0;MyCancerGenome: present;CancerHotspot: yes;3DHotspot: yes			MutationAssessor: impact: medium, score: 2.685;SIFT: impact: deleterious, score: 0;Polyphen-2: impact: benign, score: 0.303	Missense_Mutation	SNP	Diploid	25876	SOMATIC	Unknown	MSKCC	12	25398284	25398284	C	T	12:g.25398284C>T	ENST00000311936.3:c.35G>A	0.31		195	443		362	11	45327		Pathogenic			37	EO	Over_35	26.3	OW	9.7	0	BRBPR; CHANGE IN BOWEL HABITS	0.2891	IMPACT468	0	0		MSS
Colorectal Cancer (MSK, JNCI 2021)	P-0040064-T01-IM6	Colorectal Cancer	Colon Adenocarcinoma	KRAS	G12D	OncoKB: Oncogenic, level_3b, level_r1;CIViC: diagnosticCount: 2, predictiveCount: 51, prognosticCount: 6, predisposingCount: 0, oncogenicCount: 0, functionalCount: 0;MyCancerGenome: present;CancerHotspot: yes;3DHotspot: yes			MutationAssessor: impact: medium, score: 2.685;SIFT: impact: deleterious, score: 0;Polyphen-2: impact: benign, score: 0.303	Missense_Mutation	SNP	Diploid	25876	SOMATIC	Unknown	MSKCC	12	25398284	25398284	C	T	12:g.25398284C>T	ENST00000311936.3:c.35G>A	0.1		50	438		291	12	45327		Pathogenic			36	EO	Over_35	24.8	NW	10.5	0	OTHER	0.029	IMPACT468	0	0		MSS
Colorectal Cancer (MSK, JNCI 2021)	P-0003298-T01-IM5	Colorectal Cancer	Colon Adenocarcinoma	KRAS	G12A	OncoKB: Oncogenic, level_3b, level_r1;CIViC: diagnosticCount: 0, predictiveCount: 25, prognosticCount: 0, predisposingCount: 0, oncogenicCount: 0, functionalCount: 0;MyCancerGenome: present;CancerHotspot: yes;3DHotspot: yes			MutationAssessor: impact: low, score: 1.235;SIFT: impact: deleterious, score: 0.02;Polyphen-2: impact: possibly_damaging, score: 0.723	Missense_Mutation	SNP	Diploid	25876	SOMATIC	Unknown	MSKCC	12	25398284	25398284	C	G	12:g.25398284C>G	ENST00000311936.3:c.35G>C	0.38		295	487		275	7	45327		Pathogenic/Likely_pathogenic			66	AO	AO	29.2	OW	6.9	0	Abdominal pain; anemia	0.0719	IMPACT410	0	0		MSS
Colorectal Cancer (MSK, JNCI 2021)	P-0005164-T01-IM5	Colorectal Cancer	Colon Adenocarcinoma	KRAS	G12A	OncoKB: Oncogenic, level_3b, level_r1;CIViC: diagnosticCount: 0, predictiveCount: 25, prognosticCount: 0, predisposingCount: 0, oncogenicCount: 0, functionalCount: 0;MyCancerGenome: present;CancerHotspot: yes;3DHotspot: yes			MutationAssessor: impact: low, score: 1.235;SIFT: impact: deleterious, score: 0.02;Polyphen-2: impact: possibly_damaging, score: 0.723	Missense_Mutation	SNP	Diploid	25876	SOMATIC	Unknown	MSKCC	12	25398284	25398284	C	G	12:g.25398284C>G	ENST00000311936.3:c.35G>C	0.24		136	420		451	6	45327		Pathogenic/Likely_pathogenic			52	AO	AO	22.9	NW	5.9	0	constipation, GI discomfort	0.3121	IMPACT410	0	1		MSS
Colorectal Cancer (MSK, JNCI 2021)	P-0007592-T01-IM5	Colorectal Cancer	Colon Adenocarcinoma	KRAS	G12A	OncoKB: Oncogenic, level_3b, level_r1;CIViC: diagnosticCount: 0, predictiveCount: 25, prognosticCount: 0, predisposingCount: 0, oncogenicCount: 0, functionalCount: 0;MyCancerGenome: present;CancerHotspot: yes;3DHotspot: yes			MutationAssessor: impact: low, score: 1.235;SIFT: impact: deleterious, score: 0.02;Polyphen-2: impact: possibly_damaging, score: 0.723	Missense_Mutation	SNP	Diploid	25876	SOMATIC	Unknown	MSKCC	12	25398284	25398284	C	G	12:g.25398284C>G	ENST00000311936.3:c.35G>C	0.28		272	688		343	9	45327		Pathogenic/Likely_pathogenic			51	AO	AO	25.2	OW	8.9	0	abdominal pain; fatigue; abnormal imaging	0.182	IMPACT410	0	1		MSS
Colorectal Cancer (MSK, JNCI 2021)	P-0009192-T01-IM5	Colorectal Cancer	Colon Adenocarcinoma	KRAS	G12A	OncoKB: Oncogenic, level_3b, level_r1;CIViC: diagnosticCount: 0, predictiveCount: 25, prognosticCount: 0, predisposingCount: 0, oncogenicCount: 0, functionalCount: 0;MyCancerGenome: present;CancerHotspot: yes;3DHotspot: yes			MutationAssessor: impact: low, score: 1.235;SIFT: impact: deleterious, score: 0.02;Polyphen-2: impact: possibly_damaging, score: 0.723	Missense_Mutation	SNP	Diploid	25876	SOMATIC	Unknown	MSKCC	12	25398284	25398284	C	G	12:g.25398284C>G	ENST00000311936.3:c.35G>C	0.25	0.0025	253	777	1	403	8	45327		Pathogenic/Likely_pathogenic			48	EO	Over_35	27.1	OW	7.9	0	BRBPR	0.2147	IMPACT410	0	0		MSS
Colorectal Cancer (MSK, JNCI 2021)	P-0010022-T01-IM5	Colorectal Cancer	Colon Adenocarcinoma	KRAS	G12A	OncoKB: Oncogenic, level_3b, level_r1;CIViC: diagnosticCount: 0, predictiveCount: 25, prognosticCount: 0, predisposingCount: 0, oncogenicCount: 0, functionalCount: 0;MyCancerGenome: present;CancerHotspot: yes;3DHotspot: yes			MutationAssessor: impact: low, score: 1.235;SIFT: impact: deleterious, score: 0.02;Polyphen-2: impact: possibly_damaging, score: 0.723	Missense_Mutation	SNP	Diploid	25876	SOMATIC	Unknown	MSKCC	12	25398284	25398284	C	G	12:g.25398284C>G	ENST00000311936.3:c.35G>C	0.25		199	591		548	9	45327		Pathogenic/Likely_pathogenic			57	AO	AO	29.7	OW	8.9	0	SCREENING COLONOSCOPY	0.0533	IMPACT410	0			MSS
Colorectal Cancer (MSK, JNCI 2021)	P-0010243-T01-IM5	Colorectal Cancer	Colon Adenocarcinoma	KRAS	G12A	OncoKB: Oncogenic, level_3b, level_r1;CIViC: diagnosticCount: 0, predictiveCount: 25, prognosticCount: 0, predisposingCount: 0, oncogenicCount: 0, functionalCount: 0;MyCancerGenome: present;CancerHotspot: yes;3DHotspot: yes			MutationAssessor: impact: low, score: 1.235;SIFT: impact: deleterious, score: 0.02;Polyphen-2: impact: possibly_damaging, score: 0.723	Missense_Mutation	SNP	Diploid	25876	SOMATIC	Unknown	MSKCC	12	25398284	25398284	C	G	12:g.25398284C>G	ENST00000311936.3:c.35G>C	0.45		159	193		451	5	45327		Pathogenic/Likely_pathogenic			31	EO	Under_35	27.1	OW	4.9	0	BRBPR	0.4085	IMPACT410	0			MSS
Colorectal Cancer (MSK, JNCI 2021)	P-0012823-T01-IM5	Colorectal Cancer	Rectal Adenocarcinoma	KRAS	G12A	OncoKB: Oncogenic, level_3b, level_r1;CIViC: diagnosticCount: 0, predictiveCount: 25, prognosticCount: 0, predisposingCount: 0, oncogenicCount: 0, functionalCount: 0;MyCancerGenome: present;CancerHotspot: yes;3DHotspot: yes			MutationAssessor: impact: low, score: 1.235;SIFT: impact: deleterious, score: 0.02;Polyphen-2: impact: possibly_damaging, score: 0.723	Missense_Mutation	SNP	Diploid	25876	SOMATIC	Unknown	MSKCC	12	25398284	25398284	C	G	12:g.25398284C>G	ENST00000311936.3:c.35G>C	0.3		260	594		483	8	45327		Pathogenic/Likely_pathogenic			48	EO	Over_35	21.8	NW	7.9	0	ABDOMINAL PAIN, BLOATING/ABDOMINAL GIRTH/PELVIC PRESSURE,PAIN; OTHER	0.1122	IMPACT410	0	0		MSS
Colorectal Cancer (MSK, JNCI 2021)	P-0018101-T01-IM6	Colorectal Cancer	Colorectal Adenocarcinoma	KRAS	G12A	OncoKB: Oncogenic, level_3b, level_r1;CIViC: diagnosticCount: 0, predictiveCount: 25, prognosticCount: 0, predisposingCount: 0, oncogenicCount: 0, functionalCount: 0;MyCancerGenome: present;CancerHotspot: yes;3DHotspot: yes			MutationAssessor: impact: low, score: 1.235;SIFT: impact: deleterious, score: 0.02;Polyphen-2: impact: possibly_damaging, score: 0.723	Missense_Mutation	SNP	Diploid	25876	SOMATIC	Unknown	MSKCC	12	25398284	25398284	C	G	12:g.25398284C>G	ENST00000311936.3:c.35G>C	0.16		152	810		702	6	45327		Pathogenic/Likely_pathogenic			47	EO	Over_35	24.2	NW	5.3	0		0.1623	IMPACT468	0			MSS
Colorectal Cancer (MSK, JNCI 2021)	P-0019065-T01-IM6	Colorectal Cancer	Rectal Adenocarcinoma	KRAS	G12A	OncoKB: Oncogenic, level_3b, level_r1;CIViC: diagnosticCount: 0, predictiveCount: 25, prognosticCount: 0, predisposingCount: 0, oncogenicCount: 0, functionalCount: 0;MyCancerGenome: present;CancerHotspot: yes;3DHotspot: yes			MutationAssessor: impact: low, score: 1.235;SIFT: impact: deleterious, score: 0.02;Polyphen-2: impact: possibly_damaging, score: 0.723	Missense_Mutation	SNP	Diploid	25876	SOMATIC	Unknown	MSKCC	12	25398284	25398284	C	G	12:g.25398284C>G	ENST00000311936.3:c.35G>C	0.18		180	821		815	9	45327		Pathogenic/Likely_pathogenic			43	EO	Over_35	26	OW	7.9	0	ABDOMINAL PAIN, BLOATING/ABDOMINAL GIRTH/PELVIC PRESSURE,PAIN	0.1833	IMPACT468	0	0		MSS
Colorectal Cancer (MSK, JNCI 2021)	P-0020232-T01-IM6	Colorectal Cancer	Colon Adenocarcinoma	KRAS	G12A	OncoKB: Oncogenic, level_3b, level_r1;CIViC: diagnosticCount: 0, predictiveCount: 25, prognosticCount: 0, predisposingCount: 0, oncogenicCount: 0, functionalCount: 0;MyCancerGenome: present;CancerHotspot: yes;3DHotspot: yes			MutationAssessor: impact: low, score: 1.235;SIFT: impact: deleterious, score: 0.02;Polyphen-2: impact: possibly_damaging, score: 0.723	Missense_Mutation	SNP	Diploid	25876	SOMATIC	Unknown	MSKCC	12	25398284	25398284	C	G	12:g.25398284C>G	ENST00000311936.3:c.35G>C	0.07		35	465		931	8	45327		Pathogenic/Likely_pathogenic			38	EO	Over_35	23.8	NW	7	0	BRBPR	0.0716	IMPACT468	0	1		MSS
Colorectal Cancer (MSK, JNCI 2021)	P-0020245-T01-IM6	Colorectal Cancer	Colon Adenocarcinoma	KRAS	G12A	OncoKB: Oncogenic, level_3b, level_r1;CIViC: diagnosticCount: 0, predictiveCount: 25, prognosticCount: 0, predisposingCount: 0, oncogenicCount: 0, functionalCount: 0;MyCancerGenome: present;CancerHotspot: yes;3DHotspot: yes			MutationAssessor: impact: low, score: 1.235;SIFT: impact: deleterious, score: 0.02;Polyphen-2: impact: possibly_damaging, score: 0.723	Missense_Mutation	SNP	Diploid	25876	SOMATIC	Unknown	MSKCC	12	25398284	25398284	C	G	12:g.25398284C>G	ENST00000311936.3:c.35G>C	0.31		253	562		894	6	45327		Pathogenic/Likely_pathogenic			33	EO	Under_35	37.3	OB	5.3	0	CHANGE IN BOWEL HABITS	0.2763	IMPACT468	0	0		MSS
Colorectal Cancer (MSK, JNCI 2021)	P-0020999-T01-IM6	Colorectal Cancer	Rectal Adenocarcinoma	KRAS	G12A	OncoKB: Oncogenic, level_3b, level_r1;CIViC: diagnosticCount: 0, predictiveCount: 25, prognosticCount: 0, predisposingCount: 0, oncogenicCount: 0, functionalCount: 0;MyCancerGenome: present;CancerHotspot: yes;3DHotspot: yes			MutationAssessor: impact: low, score: 1.235;SIFT: impact: deleterious, score: 0.02;Polyphen-2: impact: possibly_damaging, score: 0.723	Missense_Mutation	SNP	Diploid	25876	SOMATIC	Unknown	MSKCC	12	25398284	25398284	C	G	12:g.25398284C>G	ENST00000311936.3:c.35G>C	0.24		189	603		991	6	45327		Pathogenic/Likely_pathogenic			44	EO	Over_35	22.6	NW	5.3	0	BRBPR; OTHER	0.0189	IMPACT468	0	1		MSS
Colorectal Cancer (MSK, JNCI 2021)	P-0026847-T01-IM6	Colorectal Cancer	Rectal Adenocarcinoma	KRAS	G12A	OncoKB: Oncogenic, level_3b, level_r1;CIViC: diagnosticCount: 0, predictiveCount: 25, prognosticCount: 0, predisposingCount: 0, oncogenicCount: 0, functionalCount: 0;MyCancerGenome: present;CancerHotspot: yes;3DHotspot: yes			MutationAssessor: impact: low, score: 1.235;SIFT: impact: deleterious, score: 0.02;Polyphen-2: impact: possibly_damaging, score: 0.723	Missense_Mutation	SNP	Diploid	25876	SOMATIC	Unknown	MSKCC	12	25398284	25398284	C	G	12:g.25398284C>G	ENST00000311936.3:c.35G>C	0.46		383	449		423	8	45327		Pathogenic/Likely_pathogenic			40	EO	Over_35	26.3	OW	7	0	CHANGE IN BOWEL HABITS; BRBPR	0.2003	IMPACT468	0	1		MSS
Colorectal Cancer (MSK, JNCI 2021)	P-0030191-T01-IM6	Colorectal Cancer	Colorectal Adenocarcinoma	KRAS	G12A	OncoKB: Oncogenic, level_3b, level_r1;CIViC: diagnosticCount: 0, predictiveCount: 25, prognosticCount: 0, predisposingCount: 0, oncogenicCount: 0, functionalCount: 0;MyCancerGenome: present;CancerHotspot: yes;3DHotspot: yes			MutationAssessor: impact: low, score: 1.235;SIFT: impact: deleterious, score: 0.02;Polyphen-2: impact: possibly_damaging, score: 0.723	Missense_Mutation	SNP	Diploid	25876	SOMATIC	Unknown	MSKCC	12	25398284	25398284	C	G	12:g.25398284C>G	ENST00000311936.3:c.35G>C	0.23	0.04	62	211	17	363	4	45327		Pathogenic/Likely_pathogenic			39	EO	Over_35	23.1	NW	3.5	0	ABDOMINAL PAIN, BLOATING/ABDOMINAL GIRTH/PELVIC PRESSURE,PAIN	0.0522	IMPACT468	0	0		MSS
Colorectal Cancer (MSK, JNCI 2021)	P-0030865-T01-IM6	Colorectal Cancer	Mucinous Adenocarcinoma of the Colon and Rectum	KRAS	G12A	OncoKB: Oncogenic, level_3b, level_r1;CIViC: diagnosticCount: 0, predictiveCount: 25, prognosticCount: 0, predisposingCount: 0, oncogenicCount: 0, functionalCount: 0;MyCancerGenome: present;CancerHotspot: yes;3DHotspot: yes			MutationAssessor: impact: low, score: 1.235;SIFT: impact: deleterious, score: 0.02;Polyphen-2: impact: possibly_damaging, score: 0.723	Missense_Mutation	SNP	Diploid	25876	SOMATIC	Unknown	MSKCC	12	25398284	25398284	C	G	12:g.25398284C>G	ENST00000311936.3:c.35G>C	0.26		84	240		443	5	45327		Pathogenic/Likely_pathogenic			43	EO	Over_35			4.4	0		0.0386	IMPACT468	0
Colorectal Cancer (MSK, JNCI 2021)	P-0032238-T01-IM6	Colorectal Cancer	Colon Adenocarcinoma	KRAS	G12A	OncoKB: Oncogenic, level_3b, level_r1;CIViC: diagnosticCount: 0, predictiveCount: 25, prognosticCount: 0, predisposingCount: 0, oncogenicCount: 0, functionalCount: 0;MyCancerGenome: present;CancerHotspot: yes;3DHotspot: yes			MutationAssessor: impact: low, score: 1.235;SIFT: impact: deleterious, score: 0.02;Polyphen-2: impact: possibly_damaging, score: 0.723	Missense_Mutation	SNP	Diploid	25876	SOMATIC	Unknown	MSKCC	12	25398284	25398284	C	G	12:g.25398284C>G	ENST00000311936.3:c.35G>C	0.42		239	325		426	5	45327		Pathogenic/Likely_pathogenic			30	EO	Under_35	27.1	OW	4.4	0	BRBPR	0.2232	IMPACT468	0			MSS
Colorectal Cancer (MSK, JNCI 2021)	P-0033751-T01-IM6	Colorectal Cancer	Colorectal Adenocarcinoma	KRAS	G12A	OncoKB: Oncogenic, level_3b, level_r1;CIViC: diagnosticCount: 0, predictiveCount: 25, prognosticCount: 0, predisposingCount: 0, oncogenicCount: 0, functionalCount: 0;MyCancerGenome: present;CancerHotspot: yes;3DHotspot: yes			MutationAssessor: impact: low, score: 1.235;SIFT: impact: deleterious, score: 0.02;Polyphen-2: impact: possibly_damaging, score: 0.723	Missense_Mutation	SNP	Diploid	25876	SOMATIC	Unknown	MSKCC	12	25398284	25398284	C	G	12:g.25398284C>G	ENST00000311936.3:c.35G>C	0.04		20	469		410	2	45327		Pathogenic/Likely_pathogenic			46	EO	Over_35	23.5	NW	1.8	0	ABDOMINAL PAIN, BLOATING/ABDOMINAL GIRTH/PELVIC PRESSURE,PAIN	0	IMPACT468	0			MSS
Colorectal Cancer (MSK, JNCI 2021)	P-0037492-T01-IM6	Colorectal Cancer	Colorectal Adenocarcinoma	KRAS	G12A	OncoKB: Oncogenic, level_3b, level_r1;CIViC: diagnosticCount: 0, predictiveCount: 25, prognosticCount: 0, predisposingCount: 0, oncogenicCount: 0, functionalCount: 0;MyCancerGenome: present;CancerHotspot: yes;3DHotspot: yes			MutationAssessor: impact: low, score: 1.235;SIFT: impact: deleterious, score: 0.02;Polyphen-2: impact: possibly_damaging, score: 0.723	Missense_Mutation	SNP	Diploid	25876	SOMATIC	Unknown	MSKCC	12	25398284	25398284	C	G	12:g.25398284C>G	ENST00000311936.3:c.35G>C	0.1		69	636		492	4	45327		Pathogenic/Likely_pathogenic			28	EO	Under_35	27.6	OW	3.5	0	BRBPR; RECTAL PAIN	0.2153	IMPACT468	0			MSS
Colorectal Cancer (MSK, JNCI 2021)	P-0001778-T01-IM3	Colorectal Cancer	Colon Adenocarcinoma	KRAS	G12R	OncoKB: Oncogenic, level_3b, level_r1;CIViC: diagnosticCount: 0, predictiveCount: 18, prognosticCount: 1, predisposingCount: 0, oncogenicCount: 0, functionalCount: 0;MyCancerGenome: present;CancerHotspot: yes;3DHotspot: yes			MutationAssessor: impact: low, score: 1.77;SIFT: impact: deleterious, score: 0.03;Polyphen-2: impact: possibly_damaging, score: 0.497	Missense_Mutation	SNP	Diploid	25876	SOMATIC	Unknown	MSKCC	12	25398285	25398285	C	G	12:g.25398285C>G	ENST00000311936.3:c.34G>C	0.18		181	820		687	8	45327		Pathogenic/Likely_pathogenic			50	AO	AO	19.1	NW	8.9	0	abdominal cramping	0.1678	IMPACT341	1	0		MSS
Colorectal Cancer (MSK, JNCI 2021)	P-0007999-T01-IM5	Colorectal Cancer	Colon Adenocarcinoma	KRAS	G12R	OncoKB: Oncogenic, level_3b, level_r1;CIViC: diagnosticCount: 0, predictiveCount: 18, prognosticCount: 1, predisposingCount: 0, oncogenicCount: 0, functionalCount: 0;MyCancerGenome: present;CancerHotspot: yes;3DHotspot: yes			MutationAssessor: impact: low, score: 1.77;SIFT: impact: deleterious, score: 0.03;Polyphen-2: impact: possibly_damaging, score: 0.497	Missense_Mutation	SNP	Diploid	25876	SOMATIC	Unknown	MSKCC	12	25398285	25398285	C	G	12:g.25398285C>G	ENST00000311936.3:c.34G>C	0.13		86	563		356	11	45327		Pathogenic/Likely_pathogenic			65	AO	AO	22.5	NW	10.8	0	Fatigue; change in bowel habits	0.0154	IMPACT410	0	0		MSS
Colorectal Cancer (MSK, JNCI 2021)	P-0028864-T01-IM6	Colorectal Cancer	Colon Adenocarcinoma	KRAS	G12R	OncoKB: Oncogenic, level_3b, level_r1;CIViC: diagnosticCount: 0, predictiveCount: 18, prognosticCount: 1, predisposingCount: 0, oncogenicCount: 0, functionalCount: 0;MyCancerGenome: present;CancerHotspot: yes;3DHotspot: yes			MutationAssessor: impact: low, score: 1.77;SIFT: impact: deleterious, score: 0.03;Polyphen-2: impact: possibly_damaging, score: 0.497	Missense_Mutation	SNP	Diploid	25876	SOMATIC	Unknown	MSKCC	12	25398285	25398285	C	G	12:g.25398285C>G	ENST00000311936.3:c.34G>C	0.26		182	506		401	7	45327		Pathogenic/Likely_pathogenic			46	EO	Over_35	30.8	OB	6.1	0	ABDOMINAL PAIN, BLOATING/ABDOMINAL GIRTH/PELVIC PRESSURE,PAIN; CHANGE IN BOWEL HABITS	0.0635	IMPACT468	0	1		MSS
Colorectal Cancer (MSK, JNCI 2021)	P-0040131-T01-IM6	Colorectal Cancer	Rectal Adenocarcinoma	KRAS	G12R	OncoKB: Oncogenic, level_3b, level_r1;CIViC: diagnosticCount: 0, predictiveCount: 18, prognosticCount: 1, predisposingCount: 0, oncogenicCount: 0, functionalCount: 0;MyCancerGenome: present;CancerHotspot: yes;3DHotspot: yes			MutationAssessor: impact: low, score: 1.77;SIFT: impact: deleterious, score: 0.03;Polyphen-2: impact: possibly_damaging, score: 0.497	Missense_Mutation	SNP	Diploid	25876	SOMATIC	Unknown	MSKCC	12	25398285	25398285	C	G	12:g.25398285C>G	ENST00000311936.3:c.34G>C	0.3		178	425		445	5	45327		Pathogenic/Likely_pathogenic			43	EO	Over_35	33.3	OB	4.4	0	ABDOMINAL PAIN, BLOATING/ABDOMINAL GIRTH/PELVIC PRESSURE,PAIN	0.0314	IMPACT468	0	1		MSS
Colorectal Cancer (MSK, JNCI 2021)	P-0007774-T01-IM5	Colorectal Cancer	Colon Adenocarcinoma	KRAS	G12S	OncoKB: Oncogenic, level_3b, level_r1;CIViC: diagnosticCount: 1, predictiveCount: 28, prognosticCount: 0, predisposingCount: 0, oncogenicCount: 0, functionalCount: 0;MyCancerGenome: present;CancerHotspot: yes;3DHotspot: yes			MutationAssessor: NA;SIFT: impact: deleterious, score: 0.03;Polyphen-2: impact: possibly_damaging, score: 0.582	Missense_Mutation	DNP	Diploid	25876	SOMATIC	Unknown	MSKCC	12	25398284	25398285	CC	GA	12:g.25398284_25398285delinsGA	ENST00000311936.3:c.34_35delinsTC	0.26		154	430		344	8	45327					73	AO	AO	21.6	NW	7.9	0	weight loss, vomiting, diarrhea	0.2342	IMPACT410	1			MSS
Colorectal Cancer (MSK, JNCI 2021)	P-0000678-T01-IM3	Colorectal Cancer	Colon Adenocarcinoma	KRAS	G13D	OncoKB: Oncogenic, level_4, level_r1;CIViC: diagnosticCount: 0, predictiveCount: 35, prognosticCount: 0, predisposingCount: 0, oncogenicCount: 0, functionalCount: 0;MyCancerGenome: present;CancerHotspot: yes;3DHotspot: yes			MutationAssessor: impact: medium, score: 3.025;SIFT: impact: deleterious, score: 0.04;Polyphen-2: impact: benign, score: 0.44	Missense_Mutation	SNP	Diploid	4452	SOMATIC	Unknown	MSKCC	12	25398281	25398281	C	T	12:g.25398281C>T	ENST00000311936.3:c.38G>A	0.48		144	156		246	11	45327		Conflicting_interpretations_of_pathogenicity(Pathogenic(6)|Uncertain_significance(1))			82	AO	AO	19.9	NW	12.3	0	tarry blood in stool, fatigue, rectal discomfort, weight loss, rectal pain, rectal bleeding	0.4486	IMPACT341	0	1		MSS
Colorectal Cancer (MSK, JNCI 2021)	P-0001020-T01-IM3	Colorectal Cancer	Colon Adenocarcinoma	KRAS	G13D	OncoKB: Oncogenic, level_4, level_r1;CIViC: diagnosticCount: 0, predictiveCount: 35, prognosticCount: 0, predisposingCount: 0, oncogenicCount: 0, functionalCount: 0;MyCancerGenome: present;CancerHotspot: yes;3DHotspot: yes			MutationAssessor: impact: medium, score: 3.025;SIFT: impact: deleterious, score: 0.04;Polyphen-2: impact: benign, score: 0.44	Missense_Mutation	SNP	Diploid	4452	SOMATIC	Unknown	MSKCC	12	25398281	25398281	C	T	12:g.25398281C>T	ENST00000311936.3:c.38G>A	0.5	0.0026	395	400	1	389	25	45327		Conflicting_interpretations_of_pathogenicity(Pathogenic(6)|Uncertain_significance(1))			63	AO	AO	39.7	OB	27.9	0	incidentally found on colonoscopy	0.0183	IMPACT341	1			MSI
Colorectal Cancer (MSK, JNCI 2021)	P-0001237-T01-IM3	Colorectal Cancer	Mucinous Adenocarcinoma of the Colon and Rectum	KRAS	G13D	OncoKB: Oncogenic, level_4, level_r1;CIViC: diagnosticCount: 0, predictiveCount: 35, prognosticCount: 0, predisposingCount: 0, oncogenicCount: 0, functionalCount: 0;MyCancerGenome: present;CancerHotspot: yes;3DHotspot: yes			MutationAssessor: impact: medium, score: 3.025;SIFT: impact: deleterious, score: 0.04;Polyphen-2: impact: benign, score: 0.44	Missense_Mutation	SNP	Diploid	4452	UNKNOWN	NA	MSKCC	12	25398281	25398281	C	T	12:g.25398281C>T	ENST00000311936.3:c.38G>A	0.07	0.0014	20	259	1	733	67	45327		Conflicting_interpretations_of_pathogenicity(Pathogenic(6)|Uncertain_significance(1))			46	EO	Over_35	24.5	NW	74.7	0	BRBPR	0.0939	IMPACT341	0			MSI
Colorectal Cancer (MSK, JNCI 2021)	P-0001289-T01-IM3	Colorectal Cancer	Colon Adenocarcinoma	KRAS	G13D	OncoKB: Oncogenic, level_4, level_r1;CIViC: diagnosticCount: 0, predictiveCount: 35, prognosticCount: 0, predisposingCount: 0, oncogenicCount: 0, functionalCount: 0;MyCancerGenome: present;CancerHotspot: yes;3DHotspot: yes			MutationAssessor: impact: medium, score: 3.025;SIFT: impact: deleterious, score: 0.04;Polyphen-2: impact: benign, score: 0.44	Missense_Mutation	SNP	Diploid	4452	SOMATIC	Unknown	MSKCC	12	25398281	25398281	C	T	12:g.25398281C>T	ENST00000311936.3:c.38G>A	0.45		196	237		304	8	45327		Conflicting_interpretations_of_pathogenicity(Pathogenic(6)|Uncertain_significance(1))			62	AO	AO	37	OB	8.9	0	Abdominal pain	0.0909	IMPACT341	1	1		MSS
Colorectal Cancer (MSK, JNCI 2021)	P-0001742-T01-IM3	Colorectal Cancer	Rectal Adenocarcinoma	KRAS	G13D	OncoKB: Oncogenic, level_4, level_r1;CIViC: diagnosticCount: 0, predictiveCount: 35, prognosticCount: 0, predisposingCount: 0, oncogenicCount: 0, functionalCount: 0;MyCancerGenome: present;CancerHotspot: yes;3DHotspot: yes			MutationAssessor: impact: medium, score: 3.025;SIFT: impact: deleterious, score: 0.04;Polyphen-2: impact: benign, score: 0.44	Missense_Mutation	SNP	Diploid	4452	SOMATIC	Unknown	MSKCC	12	25398281	25398281	C	T	12:g.25398281C>T	ENST00000311936.3:c.38G>A	0.24		17	54		375	2	45327		Conflicting_interpretations_of_pathogenicity(Pathogenic(6)|Uncertain_significance(1))			61	AO	AO	24.5	NW	2.2	0	diarrhea, rectal bleeding, LLQ cramping	0.1897	IMPACT341	0	1		MSS
Colorectal Cancer (MSK, JNCI 2021)	P-0002070-T01-IM3	Colorectal Cancer	Colon Adenocarcinoma	KRAS	G13D	OncoKB: Oncogenic, level_4, level_r1;CIViC: diagnosticCount: 0, predictiveCount: 35, prognosticCount: 0, predisposingCount: 0, oncogenicCount: 0, functionalCount: 0;MyCancerGenome: present;CancerHotspot: yes;3DHotspot: yes			MutationAssessor: impact: medium, score: 3.025;SIFT: impact: deleterious, score: 0.04;Polyphen-2: impact: benign, score: 0.44	Missense_Mutation	SNP	Diploid	4452	SOMATIC	Unknown	MSKCC	12	25398281	25398281	C	T	12:g.25398281C>T	ENST00000311936.3:c.38G>A	0.24		319	987		342	9	45327		Conflicting_interpretations_of_pathogenicity(Pathogenic(6)|Uncertain_significance(1))			60	AO	AO	27.7	OW	10	0	rectal bleeding	0.1193	IMPACT341	1	0		MSS
Colorectal Cancer (MSK, JNCI 2021)	P-0002475-T01-IM3	Colorectal Cancer	Colon Adenocarcinoma	KRAS	G13D	OncoKB: Oncogenic, level_4, level_r1;CIViC: diagnosticCount: 0, predictiveCount: 35, prognosticCount: 0, predisposingCount: 0, oncogenicCount: 0, functionalCount: 0;MyCancerGenome: present;CancerHotspot: yes;3DHotspot: yes			MutationAssessor: impact: medium, score: 3.025;SIFT: impact: deleterious, score: 0.04;Polyphen-2: impact: benign, score: 0.44	Missense_Mutation	SNP	Diploid	4452	SOMATIC	Unknown	MSKCC	12	25398281	25398281	C	T	12:g.25398281C>T	ENST00000311936.3:c.38G>A	0.38		353	587		468	9	45327		Conflicting_interpretations_of_pathogenicity(Pathogenic(6)|Uncertain_significance(1))			68	AO	AO	32.5	OB	10	0	Abdominal pain; BRBPR	0.313	IMPACT341	1	0		MSS
Colorectal Cancer (MSK, JNCI 2021)	P-0002529-T01-IM3	Colorectal Cancer	Colon Adenocarcinoma	KRAS	G13D	OncoKB: Oncogenic, level_4, level_r1;CIViC: diagnosticCount: 0, predictiveCount: 35, prognosticCount: 0, predisposingCount: 0, oncogenicCount: 0, functionalCount: 0;MyCancerGenome: present;CancerHotspot: yes;3DHotspot: yes			MutationAssessor: impact: medium, score: 3.025;SIFT: impact: deleterious, score: 0.04;Polyphen-2: impact: benign, score: 0.44	Missense_Mutation	SNP	Diploid	4452	SOMATIC	Unknown	MSKCC	12	25398281	25398281	C	T	12:g.25398281C>T	ENST00000311936.3:c.38G>A	0.27		196	535		402	8	45327		Conflicting_interpretations_of_pathogenicity(Pathogenic(6)|Uncertain_significance(1))			67	AO	AO	24.5	NW	8.9	0	change in bowel habits, brbpr, anemia	0.1492	IMPACT341	0	0		MSS
Colorectal Cancer (MSK, JNCI 2021)	P-0002540-T01-IM3	Colorectal Cancer	Rectal Adenocarcinoma	KRAS	G13D	OncoKB: Oncogenic, level_4, level_r1;CIViC: diagnosticCount: 0, predictiveCount: 35, prognosticCount: 0, predisposingCount: 0, oncogenicCount: 0, functionalCount: 0;MyCancerGenome: present;CancerHotspot: yes;3DHotspot: yes			MutationAssessor: impact: medium, score: 3.025;SIFT: impact: deleterious, score: 0.04;Polyphen-2: impact: benign, score: 0.44	Missense_Mutation	SNP	Diploid	4452	SOMATIC	Unknown	MSKCC	12	25398281	25398281	C	T	12:g.25398281C>T	ENST00000311936.3:c.38G>A	0.08	0.0019	105	1228	1	535	8	45327		Conflicting_interpretations_of_pathogenicity(Pathogenic(6)|Uncertain_significance(1))			65	AO	AO	31.1	OB	8.9	0	bowel obstruction	0.0004	IMPACT341	1	0		MSS
Colorectal Cancer (MSK, JNCI 2021)	P-0003183-T01-IM5	Colorectal Cancer	Colon Adenocarcinoma	KRAS	G13D	OncoKB: Oncogenic, level_4, level_r1;CIViC: diagnosticCount: 0, predictiveCount: 35, prognosticCount: 0, predisposingCount: 0, oncogenicCount: 0, functionalCount: 0;MyCancerGenome: present;CancerHotspot: yes;3DHotspot: yes			MutationAssessor: impact: medium, score: 3.025;SIFT: impact: deleterious, score: 0.04;Polyphen-2: impact: benign, score: 0.44	Missense_Mutation	SNP	Diploid	4452	SOMATIC	Unknown	MSKCC	12	25398281	25398281	C	T	12:g.25398281C>T	ENST00000311936.3:c.38G>A	0.4		303	455		372	8	45327		Conflicting_interpretations_of_pathogenicity(Pathogenic(6)|Uncertain_significance(1))			72	AO	AO	26.9	OW	7.9	0	abdominal pain; upper GI sx	0.0055	IMPACT410	1	0		MSS
Colorectal Cancer (MSK, JNCI 2021)	P-0003513-T01-IM5	Colorectal Cancer	Rectal Adenocarcinoma	KRAS	G13D	OncoKB: Oncogenic, level_4, level_r1;CIViC: diagnosticCount: 0, predictiveCount: 35, prognosticCount: 0, predisposingCount: 0, oncogenicCount: 0, functionalCount: 0;MyCancerGenome: present;CancerHotspot: yes;3DHotspot: yes			MutationAssessor: impact: medium, score: 3.025;SIFT: impact: deleterious, score: 0.04;Polyphen-2: impact: benign, score: 0.44	Missense_Mutation	SNP	Diploid	4452	SOMATIC	Unknown	MSKCC	12	25398281	25398281	C	T	12:g.25398281C>T	ENST00000311936.3:c.38G>A	0.15		94	525		324	13	45327		Conflicting_interpretations_of_pathogenicity(Pathogenic(6)|Uncertain_significance(1))			51	AO	AO	29.4	OW	12.8	0	Change in bowel habits; BRBPR	0.1088	IMPACT410	0	1		MSS
Colorectal Cancer (MSK, JNCI 2021)	P-0003662-T01-IM5	Colorectal Cancer	Colon Adenocarcinoma	KRAS	G13D	OncoKB: Oncogenic, level_4, level_r1;CIViC: diagnosticCount: 0, predictiveCount: 35, prognosticCount: 0, predisposingCount: 0, oncogenicCount: 0, functionalCount: 0;MyCancerGenome: present;CancerHotspot: yes;3DHotspot: yes			MutationAssessor: impact: medium, score: 3.025;SIFT: impact: deleterious, score: 0.04;Polyphen-2: impact: benign, score: 0.44	Missense_Mutation	SNP	Diploid	4452	SOMATIC	Unknown	MSKCC	12	25398281	25398281	C	T	12:g.25398281C>T	ENST00000311936.3:c.38G>A	0.04		31	664		396	3	45327		Conflicting_interpretations_of_pathogenicity(Pathogenic(6)|Uncertain_significance(1))			53	AO	AO	28.6	OW	3	1	abdominal pain	0.0006	IMPACT410	0	0		MSS
Colorectal Cancer (MSK, JNCI 2021)	P-0003807-T01-IM5	Colorectal Cancer	Colon Adenocarcinoma	KRAS	G13D	OncoKB: Oncogenic, level_4, level_r1;CIViC: diagnosticCount: 0, predictiveCount: 35, prognosticCount: 0, predisposingCount: 0, oncogenicCount: 0, functionalCount: 0;MyCancerGenome: present;CancerHotspot: yes;3DHotspot: yes			MutationAssessor: impact: medium, score: 3.025;SIFT: impact: deleterious, score: 0.04;Polyphen-2: impact: benign, score: 0.44	Missense_Mutation	SNP	Diploid	4452	SOMATIC	Unknown	MSKCC	12	25398281	25398281	C	T	12:g.25398281C>T	ENST00000311936.3:c.38G>A	0.06		36	520		386	3	45327		Conflicting_interpretations_of_pathogenicity(Pathogenic(6)|Uncertain_significance(1))			53	AO	AO	24.8	NW	3	0	constipation, weight loss	0.0014	IMPACT410	1	1		MSS
Colorectal Cancer (MSK, JNCI 2021)	P-0004608-T01-IM5	Colorectal Cancer	Colon Adenocarcinoma	KRAS	G13D	OncoKB: Oncogenic, level_4, level_r1;CIViC: diagnosticCount: 0, predictiveCount: 35, prognosticCount: 0, predisposingCount: 0, oncogenicCount: 0, functionalCount: 0;MyCancerGenome: present;CancerHotspot: yes;3DHotspot: yes			MutationAssessor: impact: medium, score: 3.025;SIFT: impact: deleterious, score: 0.04;Polyphen-2: impact: benign, score: 0.44	Missense_Mutation	SNP	Diploid	4452	SOMATIC	Unknown	MSKCC	12	25398281	25398281	C	T	12:g.25398281C>T	ENST00000311936.3:c.38G>A	0.15		125	693		687	10	45327		Conflicting_interpretations_of_pathogenicity(Pathogenic(6)|Uncertain_significance(1))			56	AO	AO	23.2	NW	9.8	0	Abdominal pain	0.0005	IMPACT410	0	0		MSS
Colorectal Cancer (MSK, JNCI 2021)	P-0004738-T01-IM5	Colorectal Cancer	Colon Adenocarcinoma	KRAS	G13D	OncoKB: Oncogenic, level_4, level_r1;CIViC: diagnosticCount: 0, predictiveCount: 35, prognosticCount: 0, predisposingCount: 0, oncogenicCount: 0, functionalCount: 0;MyCancerGenome: present;CancerHotspot: yes;3DHotspot: yes			MutationAssessor: impact: medium, score: 3.025;SIFT: impact: deleterious, score: 0.04;Polyphen-2: impact: benign, score: 0.44	Missense_Mutation	SNP	Diploid	4452	SOMATIC	Unknown	MSKCC	12	25398281	25398281	C	T	12:g.25398281C>T	ENST00000311936.3:c.38G>A	0.17		82	406		412	100	45327		Conflicting_interpretations_of_pathogenicity(Pathogenic(6)|Uncertain_significance(1))			59	AO	AO	31.1	OB	98.4	1	BRBPR; change in bowel habits	0.0295	IMPACT410	1			MSI
Colorectal Cancer (MSK, JNCI 2021)	P-0005230-T01-IM5	Colorectal Cancer	Colon Adenocarcinoma	KRAS	G13D	OncoKB: Oncogenic, level_4, level_r1;CIViC: diagnosticCount: 0, predictiveCount: 35, prognosticCount: 0, predisposingCount: 0, oncogenicCount: 0, functionalCount: 0;MyCancerGenome: present;CancerHotspot: yes;3DHotspot: yes			MutationAssessor: impact: medium, score: 3.025;SIFT: impact: deleterious, score: 0.04;Polyphen-2: impact: benign, score: 0.44	Missense_Mutation	SNP	Diploid	4452	SOMATIC	Unknown	MSKCC	12	25398281	25398281	C	T	12:g.25398281C>T	ENST00000311936.3:c.38G>A	0.02		13	563		619	65	45327		Conflicting_interpretations_of_pathogenicity(Pathogenic(6)|Uncertain_significance(1))			64	AO	AO	24	NW	63.9	0	Other; Syncopy	0.0753	IMPACT410	0			MSI
Colorectal Cancer (MSK, JNCI 2021)	P-0007843-T01-IM5	Colorectal Cancer	Colon Adenocarcinoma	KRAS	G13D	OncoKB: Oncogenic, level_4, level_r1;CIViC: diagnosticCount: 0, predictiveCount: 35, prognosticCount: 0, predisposingCount: 0, oncogenicCount: 0, functionalCount: 0;MyCancerGenome: present;CancerHotspot: yes;3DHotspot: yes			MutationAssessor: impact: medium, score: 3.025;SIFT: impact: deleterious, score: 0.04;Polyphen-2: impact: benign, score: 0.44	Missense_Mutation	SNP	Diploid	4452	SOMATIC	Unknown	MSKCC	12	25398281	25398281	C	T	12:g.25398281C>T	ENST00000311936.3:c.38G>A	0.25		112	343		329	37	45327		Conflicting_interpretations_of_pathogenicity(Pathogenic(6)|Uncertain_significance(1))			31	EO	Under_35	25.5	OW	36.4	0	WEIGHT LOSS	0	IMPACT410	0			MSI
Colorectal Cancer (MSK, JNCI 2021)	P-0008128-T01-IM5	Colorectal Cancer	Colon Adenocarcinoma	KRAS	G13D	OncoKB: Oncogenic, level_4, level_r1;CIViC: diagnosticCount: 0, predictiveCount: 35, prognosticCount: 0, predisposingCount: 0, oncogenicCount: 0, functionalCount: 0;MyCancerGenome: present;CancerHotspot: yes;3DHotspot: yes			MutationAssessor: impact: medium, score: 3.025;SIFT: impact: deleterious, score: 0.04;Polyphen-2: impact: benign, score: 0.44	Missense_Mutation	SNP	Diploid	4452	SOMATIC	Unknown	MSKCC	12	25398281	25398281	C	T	12:g.25398281C>T	ENST00000311936.3:c.38G>A	0.32		235	505		326	6	45327		Conflicting_interpretations_of_pathogenicity(Pathogenic(6)|Uncertain_significance(1))			59	AO	AO	28.8	OW	5.9	0	Anemia	0.1018	IMPACT410	0	0		MSS
Colorectal Cancer (MSK, JNCI 2021)	P-0008226-T02-IM5	Colorectal Cancer	Rectal Adenocarcinoma	KRAS	G13D	OncoKB: Oncogenic, level_4, level_r1;CIViC: diagnosticCount: 0, predictiveCount: 35, prognosticCount: 0, predisposingCount: 0, oncogenicCount: 0, functionalCount: 0;MyCancerGenome: present;CancerHotspot: yes;3DHotspot: yes			MutationAssessor: impact: medium, score: 3.025;SIFT: impact: deleterious, score: 0.04;Polyphen-2: impact: benign, score: 0.44	Missense_Mutation	SNP	Diploid	4452	SOMATIC	Unknown	MSKCC	12	25398281	25398281	C	T	12:g.25398281C>T	ENST00000311936.3:c.38G>A	0.33	0.0021	258	525	1	485	59	45327		Conflicting_interpretations_of_pathogenicity(Pathogenic(6)|Uncertain_significance(1))			27	EO	Under_35			57.1	0		0.0314	IMPACT410	0
Colorectal Cancer (MSK, JNCI 2021)	P-0008377-T01-IM5	Colorectal Cancer	Colon Adenocarcinoma	KRAS	G13D	OncoKB: Oncogenic, level_4, level_r1;CIViC: diagnosticCount: 0, predictiveCount: 35, prognosticCount: 0, predisposingCount: 0, oncogenicCount: 0, functionalCount: 0;MyCancerGenome: present;CancerHotspot: yes;3DHotspot: yes			MutationAssessor: impact: medium, score: 3.025;SIFT: impact: deleterious, score: 0.04;Polyphen-2: impact: benign, score: 0.44	Missense_Mutation	SNP	Diploid	4452	SOMATIC	Unknown	MSKCC	12	25398281	25398281	C	T	12:g.25398281C>T	ENST00000311936.3:c.38G>A	0.35		244	445		395	9	45327		Conflicting_interpretations_of_pathogenicity(Pathogenic(6)|Uncertain_significance(1))			51	AO	AO	36	OB	8.9	0	ABNORMAL IMAGING	0.1424	IMPACT410	1	1		MSS
Colorectal Cancer (MSK, JNCI 2021)	P-0008521-T01-IM5	Colorectal Cancer	Rectal Adenocarcinoma	KRAS	G13D	OncoKB: Oncogenic, level_4, level_r1;CIViC: diagnosticCount: 0, predictiveCount: 35, prognosticCount: 0, predisposingCount: 0, oncogenicCount: 0, functionalCount: 0;MyCancerGenome: present;CancerHotspot: yes;3DHotspot: yes			MutationAssessor: impact: medium, score: 3.025;SIFT: impact: deleterious, score: 0.04;Polyphen-2: impact: benign, score: 0.44	Missense_Mutation	SNP	Diploid	4452	SOMATIC	Unknown	MSKCC	12	25398281	25398281	C	T	12:g.25398281C>T	ENST00000311936.3:c.38G>A	0.16		126	676		436	9	45327		Conflicting_interpretations_of_pathogenicity(Pathogenic(6)|Uncertain_significance(1))			63	AO	AO	29.7	OW	8.9	0	incidentally found on colonoscopy	0.1244	IMPACT410	0	0		MSS
Colorectal Cancer (MSK, JNCI 2021)	P-0008753-T01-IM5	Colorectal Cancer	Colon Adenocarcinoma	KRAS	G13D	OncoKB: Oncogenic, level_4, level_r1;CIViC: diagnosticCount: 0, predictiveCount: 35, prognosticCount: 0, predisposingCount: 0, oncogenicCount: 0, functionalCount: 0;MyCancerGenome: present;CancerHotspot: yes;3DHotspot: yes			MutationAssessor: impact: medium, score: 3.025;SIFT: impact: deleterious, score: 0.04;Polyphen-2: impact: benign, score: 0.44	Missense_Mutation	SNP	Diploid	4452	SOMATIC	Unknown	MSKCC	12	25398281	25398281	C	T	12:g.25398281C>T	ENST00000311936.3:c.38G>A	0.36		475	831		538	3	45327		Conflicting_interpretations_of_pathogenicity(Pathogenic(6)|Uncertain_significance(1))			60	AO	AO	29.8	OW	3	0	BRBPR; change in bowel habits	0.1365	IMPACT410	0			MSS
Colorectal Cancer (MSK, JNCI 2021)	P-0009059-T01-IM5	Colorectal Cancer	Colon Adenocarcinoma	KRAS	G13D	OncoKB: Oncogenic, level_4, level_r1;CIViC: diagnosticCount: 0, predictiveCount: 35, prognosticCount: 0, predisposingCount: 0, oncogenicCount: 0, functionalCount: 0;MyCancerGenome: present;CancerHotspot: yes;3DHotspot: yes			MutationAssessor: impact: medium, score: 3.025;SIFT: impact: deleterious, score: 0.04;Polyphen-2: impact: benign, score: 0.44	Missense_Mutation	SNP	Diploid	4452	SOMATIC	Unknown	MSKCC	12	25398281	25398281	C	T	12:g.25398281C>T	ENST00000311936.3:c.38G>A	0.03		26	801		724	1	45327		Conflicting_interpretations_of_pathogenicity(Pathogenic(6)|Uncertain_significance(1))			39	EO	Over_35	28.8	OW	1	0	ABDOMINAL PAIN, BLOATING/ABDOMINAL GIRTH/PELVIC PRESSURE,PAIN	0.0014	IMPACT410	0	0		MSS
Colorectal Cancer (MSK, JNCI 2021)	P-0009185-T01-IM5	Colorectal Cancer	Rectal Adenocarcinoma	KRAS	G13D	OncoKB: Oncogenic, level_4, level_r1;CIViC: diagnosticCount: 0, predictiveCount: 35, prognosticCount: 0, predisposingCount: 0, oncogenicCount: 0, functionalCount: 0;MyCancerGenome: present;CancerHotspot: yes;3DHotspot: yes			MutationAssessor: impact: medium, score: 3.025;SIFT: impact: deleterious, score: 0.04;Polyphen-2: impact: benign, score: 0.44	Missense_Mutation	SNP	Diploid	4452	SOMATIC	Unknown	MSKCC	12	25398281	25398281	C	T	12:g.25398281C>T	ENST00000311936.3:c.38G>A	0.24		211	671		448	5	45327		Conflicting_interpretations_of_pathogenicity(Pathogenic(6)|Uncertain_significance(1))			69	AO	AO	21	NW	4.9	0	Fatigue	0.3007	IMPACT410	0	0		MSS
Colorectal Cancer (MSK, JNCI 2021)	P-0010203-T01-IM5	Colorectal Cancer	Rectal Adenocarcinoma	KRAS	G13D	OncoKB: Oncogenic, level_4, level_r1;CIViC: diagnosticCount: 0, predictiveCount: 35, prognosticCount: 0, predisposingCount: 0, oncogenicCount: 0, functionalCount: 0;MyCancerGenome: present;CancerHotspot: yes;3DHotspot: yes			MutationAssessor: impact: medium, score: 3.025;SIFT: impact: deleterious, score: 0.04;Polyphen-2: impact: benign, score: 0.44	Missense_Mutation	SNP	Diploid	4452	SOMATIC	Unknown	MSKCC	12	25398281	25398281	C	T	12:g.25398281C>T	ENST00000311936.3:c.38G>A	0.5		340	336		316	8	45327		Conflicting_interpretations_of_pathogenicity(Pathogenic(6)|Uncertain_significance(1))			33	EO	Under_35	25.7	OW	7.9	0	BRBPR	0.3044	IMPACT410	0	1		MSS
Colorectal Cancer (MSK, JNCI 2021)	P-0010425-T01-IM5	Colorectal Cancer	Rectal Adenocarcinoma	KRAS	G13D	OncoKB: Oncogenic, level_4, level_r1;CIViC: diagnosticCount: 0, predictiveCount: 35, prognosticCount: 0, predisposingCount: 0, oncogenicCount: 0, functionalCount: 0;MyCancerGenome: present;CancerHotspot: yes;3DHotspot: yes			MutationAssessor: impact: medium, score: 3.025;SIFT: impact: deleterious, score: 0.04;Polyphen-2: impact: benign, score: 0.44	Missense_Mutation	SNP	Diploid	4452	SOMATIC	Unknown	MSKCC	12	25398281	25398281	C	T	12:g.25398281C>T	ENST00000311936.3:c.38G>A	0.09		57	550		432	5	45327		Conflicting_interpretations_of_pathogenicity(Pathogenic(6)|Uncertain_significance(1))			65	AO	AO	22.1	NW	4.9	0	positive fecal occult test	0.0433	IMPACT410	1	0		MSS
Colorectal Cancer (MSK, JNCI 2021)	P-0010798-T01-IM5	Colorectal Cancer	Colon Adenocarcinoma	KRAS	G13D	OncoKB: Oncogenic, level_4, level_r1;CIViC: diagnosticCount: 0, predictiveCount: 35, prognosticCount: 0, predisposingCount: 0, oncogenicCount: 0, functionalCount: 0;MyCancerGenome: present;CancerHotspot: yes;3DHotspot: yes			MutationAssessor: impact: medium, score: 3.025;SIFT: impact: deleterious, score: 0.04;Polyphen-2: impact: benign, score: 0.44	Missense_Mutation	SNP	Diploid	4452	SOMATIC	Unknown	MSKCC	12	25398281	25398281	C	T	12:g.25398281C>T	ENST00000311936.3:c.38G>A	0.26		192	547		296	25	45327		Conflicting_interpretations_of_pathogenicity(Pathogenic(6)|Uncertain_significance(1))			70	AO	AO	27.7	OW	24.6	0	Change in bowel habits; anemia	0.0082	IMPACT410	1			MSI
Colorectal Cancer (MSK, JNCI 2021)	P-0011109-T01-IM5	Colorectal Cancer	Colon Adenocarcinoma	KRAS	G13D	OncoKB: Oncogenic, level_4, level_r1;CIViC: diagnosticCount: 0, predictiveCount: 35, prognosticCount: 0, predisposingCount: 0, oncogenicCount: 0, functionalCount: 0;MyCancerGenome: present;CancerHotspot: yes;3DHotspot: yes			MutationAssessor: impact: medium, score: 3.025;SIFT: impact: deleterious, score: 0.04;Polyphen-2: impact: benign, score: 0.44	Missense_Mutation	SNP	Diploid	4452	SOMATIC	Unknown	MSKCC	12	25398281	25398281	C	T	12:g.25398281C>T	ENST00000311936.3:c.38G>A	0.43		299	400		339	9	45327		Conflicting_interpretations_of_pathogenicity(Pathogenic(6)|Uncertain_significance(1))			71	AO	AO	31.5	OB	8.9	0	blood in stool	0.1269	IMPACT410	1	0		MSS
Colorectal Cancer (MSK, JNCI 2021)	P-0011235-T01-IM5	Colorectal Cancer	Rectal Adenocarcinoma	KRAS	G13D	OncoKB: Oncogenic, level_4, level_r1;CIViC: diagnosticCount: 0, predictiveCount: 35, prognosticCount: 0, predisposingCount: 0, oncogenicCount: 0, functionalCount: 0;MyCancerGenome: present;CancerHotspot: yes;3DHotspot: yes			MutationAssessor: impact: medium, score: 3.025;SIFT: impact: deleterious, score: 0.04;Polyphen-2: impact: benign, score: 0.44	Missense_Mutation	SNP	Diploid	4452	SOMATIC	Unknown	MSKCC	12	25398281	25398281	C	T	12:g.25398281C>T	ENST00000311936.3:c.38G>A	0.27		296	797		335	23	45327		Conflicting_interpretations_of_pathogenicity(Pathogenic(6)|Uncertain_significance(1))			63	AO	AO	27.3	OW	22.6	0	incidentally found on colonoscopy	0.0134	IMPACT410	1			MSI
Colorectal Cancer (MSK, JNCI 2021)	P-0011520-T01-IM5	Colorectal Cancer	Rectal Adenocarcinoma	KRAS	G13D	OncoKB: Oncogenic, level_4, level_r1;CIViC: diagnosticCount: 0, predictiveCount: 35, prognosticCount: 0, predisposingCount: 0, oncogenicCount: 0, functionalCount: 0;MyCancerGenome: present;CancerHotspot: yes;3DHotspot: yes			MutationAssessor: impact: medium, score: 3.025;SIFT: impact: deleterious, score: 0.04;Polyphen-2: impact: benign, score: 0.44	Missense_Mutation	SNP	Diploid	4452	SOMATIC	Unknown	MSKCC	12	25398281	25398281	C	T	12:g.25398281C>T	ENST00000311936.3:c.38G>A	0.39		292	456		461	9	45327		Conflicting_interpretations_of_pathogenicity(Pathogenic(6)|Uncertain_significance(1))			33	EO	Under_35	20.2	NW	8.9	0	BRBPR	0.211	IMPACT410	0	1		MSS
Colorectal Cancer (MSK, JNCI 2021)	P-0012266-T01-IM5	Colorectal Cancer	Rectal Adenocarcinoma	KRAS	G13D	OncoKB: Oncogenic, level_4, level_r1;CIViC: diagnosticCount: 0, predictiveCount: 35, prognosticCount: 0, predisposingCount: 0, oncogenicCount: 0, functionalCount: 0;MyCancerGenome: present;CancerHotspot: yes;3DHotspot: yes			MutationAssessor: impact: medium, score: 3.025;SIFT: impact: deleterious, score: 0.04;Polyphen-2: impact: benign, score: 0.44	Missense_Mutation	SNP	Diploid	4452	SOMATIC	Unknown	MSKCC	12	25398281	25398281	C	T	12:g.25398281C>T	ENST00000311936.3:c.38G>A	0.08		63	702		437	7	45327		Conflicting_interpretations_of_pathogenicity(Pathogenic(6)|Uncertain_significance(1))			72	AO	AO	31	OB	6.9	0	Anemia	0.0001	IMPACT410	1			MSS
Colorectal Cancer (MSK, JNCI 2021)	P-0012415-T01-IM5	Colorectal Cancer	Colon Adenocarcinoma	KRAS	G13D	OncoKB: Oncogenic, level_4, level_r1;CIViC: diagnosticCount: 0, predictiveCount: 35, prognosticCount: 0, predisposingCount: 0, oncogenicCount: 0, functionalCount: 0;MyCancerGenome: present;CancerHotspot: yes;3DHotspot: yes			MutationAssessor: impact: medium, score: 3.025;SIFT: impact: deleterious, score: 0.04;Polyphen-2: impact: benign, score: 0.44	Missense_Mutation	SNP	Diploid	4452	SOMATIC	Unknown	MSKCC	12	25398281	25398281	C	T	12:g.25398281C>T	ENST00000311936.3:c.38G>A	0.37		299	503		378	11	45327		Conflicting_interpretations_of_pathogenicity(Pathogenic(6)|Uncertain_significance(1))			55	AO	AO	31	OB	10.8	0	rectal bleeding	0.2137	IMPACT410	0	1		MSS
Colorectal Cancer (MSK, JNCI 2021)	P-0013010-T01-IM5	Colorectal Cancer	Colon Adenocarcinoma	KRAS	G13D	OncoKB: Oncogenic, level_4, level_r1;CIViC: diagnosticCount: 0, predictiveCount: 35, prognosticCount: 0, predisposingCount: 0, oncogenicCount: 0, functionalCount: 0;MyCancerGenome: present;CancerHotspot: yes;3DHotspot: yes			MutationAssessor: impact: medium, score: 3.025;SIFT: impact: deleterious, score: 0.04;Polyphen-2: impact: benign, score: 0.44	Missense_Mutation	SNP	Diploid	4452	SOMATIC	Unknown	MSKCC	12	25398281	25398281	C	T	12:g.25398281C>T	ENST00000311936.3:c.38G>A	0.19		79	335		447	80	45327		Conflicting_interpretations_of_pathogenicity(Pathogenic(6)|Uncertain_significance(1))			64	AO	AO	27.3	OW	78.7	1	rectal bleeding, stool thinning, anorexia	0.0001	IMPACT410	0			MSI
Colorectal Cancer (MSK, JNCI 2021)	P-0013088-T01-IM5	Colorectal Cancer	Rectal Adenocarcinoma	KRAS	G13D	OncoKB: Oncogenic, level_4, level_r1;CIViC: diagnosticCount: 0, predictiveCount: 35, prognosticCount: 0, predisposingCount: 0, oncogenicCount: 0, functionalCount: 0;MyCancerGenome: present;CancerHotspot: yes;3DHotspot: yes			MutationAssessor: impact: medium, score: 3.025;SIFT: impact: deleterious, score: 0.04;Polyphen-2: impact: benign, score: 0.44	Missense_Mutation	SNP	Diploid	4452	SOMATIC	Unknown	MSKCC	12	25398281	25398281	C	T	12:g.25398281C>T	ENST00000311936.3:c.38G>A	0.29		222	536		367	6	45327		Conflicting_interpretations_of_pathogenicity(Pathogenic(6)|Uncertain_significance(1))			45	EO	Over_35	24.2	NW	5.9	0	SCREENING COLONOSCOPY	0.1608	IMPACT410	0	0		MSS
Colorectal Cancer (MSK, JNCI 2021)	P-0013975-T01-IM5	Colorectal Cancer	Colon Adenocarcinoma	KRAS	G13D	OncoKB: Oncogenic, level_4, level_r1;CIViC: diagnosticCount: 0, predictiveCount: 35, prognosticCount: 0, predisposingCount: 0, oncogenicCount: 0, functionalCount: 0;MyCancerGenome: present;CancerHotspot: yes;3DHotspot: yes			MutationAssessor: impact: medium, score: 3.025;SIFT: impact: deleterious, score: 0.04;Polyphen-2: impact: benign, score: 0.44	Missense_Mutation	SNP	Diploid	4452	SOMATIC	Unknown	MSKCC	12	25398281	25398281	C	T	12:g.25398281C>T	ENST00000311936.3:c.38G>A	0.41		293	422		581	11	45327		Conflicting_interpretations_of_pathogenicity(Pathogenic(6)|Uncertain_significance(1))			53	AO	AO	21.3	NW	10.8	0	abdominal discomfort, abdominal cramping,	0.1404	IMPACT410	0	0		MSS
Colorectal Cancer (MSK, JNCI 2021)	P-0016603-T01-IM6	Colorectal Cancer	Colon Adenocarcinoma	KRAS	G13D	OncoKB: Oncogenic, level_4, level_r1;CIViC: diagnosticCount: 0, predictiveCount: 35, prognosticCount: 0, predisposingCount: 0, oncogenicCount: 0, functionalCount: 0;MyCancerGenome: present;CancerHotspot: yes;3DHotspot: yes			MutationAssessor: impact: medium, score: 3.025;SIFT: impact: deleterious, score: 0.04;Polyphen-2: impact: benign, score: 0.44	Missense_Mutation	SNP	Diploid	4452	SOMATIC	Unknown	MSKCC	12	25398281	25398281	C	T	12:g.25398281C>T	ENST00000311936.3:c.38G>A	0.18		209	945		572	9	45327		Conflicting_interpretations_of_pathogenicity(Pathogenic(6)|Uncertain_significance(1))			45	EO	Over_35	28	OW	7.9	0	OTHER	0	IMPACT468	0	1		MSS
Colorectal Cancer (MSK, JNCI 2021)	P-0016967-T01-IM6	Colorectal Cancer	Rectal Adenocarcinoma	KRAS	G13D	OncoKB: Oncogenic, level_4, level_r1;CIViC: diagnosticCount: 0, predictiveCount: 35, prognosticCount: 0, predisposingCount: 0, oncogenicCount: 0, functionalCount: 0;MyCancerGenome: present;CancerHotspot: yes;3DHotspot: yes			MutationAssessor: impact: medium, score: 3.025;SIFT: impact: deleterious, score: 0.04;Polyphen-2: impact: benign, score: 0.44	Missense_Mutation	SNP	Diploid	4452	SOMATIC	Unknown	MSKCC	12	25398281	25398281	C	T	12:g.25398281C>T	ENST00000311936.3:c.38G>A	0.26	0.0026	190	544	2	764	8	45327		Conflicting_interpretations_of_pathogenicity(Pathogenic(6)|Uncertain_significance(1))			42	EO	Over_35	24.3	NW	7	0	BACK PAIN, SHOULDER PAIN/BACK PAIN/BONE PAIN	0.3554	IMPACT468	0	1		MSS
Colorectal Cancer (MSK, JNCI 2021)	P-0017919-T01-IM6	Colorectal Cancer	Colon Adenocarcinoma	KRAS	G13D	OncoKB: Oncogenic, level_4, level_r1;CIViC: diagnosticCount: 0, predictiveCount: 35, prognosticCount: 0, predisposingCount: 0, oncogenicCount: 0, functionalCount: 0;MyCancerGenome: present;CancerHotspot: yes;3DHotspot: yes			MutationAssessor: impact: medium, score: 3.025;SIFT: impact: deleterious, score: 0.04;Polyphen-2: impact: benign, score: 0.44	Missense_Mutation	SNP	Diploid	4452	SOMATIC	Unknown	MSKCC	12	25398281	25398281	C	T	12:g.25398281C>T	ENST00000311936.3:c.38G>A	0.31	0.0016	230	521	1	633	5	45327		Conflicting_interpretations_of_pathogenicity(Pathogenic(6)|Uncertain_significance(1))			44	EO	Over_35	32	OB	4.4	0	BRBPR	0.3355	IMPACT468	0	1		MSS
Colorectal Cancer (MSK, JNCI 2021)	P-0018437-T01-IM6	Colorectal Cancer	Colon Adenocarcinoma	KRAS	G13D	OncoKB: Oncogenic, level_4, level_r1;CIViC: diagnosticCount: 0, predictiveCount: 35, prognosticCount: 0, predisposingCount: 0, oncogenicCount: 0, functionalCount: 0;MyCancerGenome: present;CancerHotspot: yes;3DHotspot: yes			MutationAssessor: impact: medium, score: 3.025;SIFT: impact: deleterious, score: 0.04;Polyphen-2: impact: benign, score: 0.44	Missense_Mutation	SNP	Diploid	4452	SOMATIC	Unknown	MSKCC	12	25398281	25398281	C	T	12:g.25398281C>T	ENST00000311936.3:c.38G>A	0.15		85	495		359	60	45327		Conflicting_interpretations_of_pathogenicity(Pathogenic(6)|Uncertain_significance(1))			38	EO	Over_35			52.7	0		0	IMPACT468	0
Colorectal Cancer (MSK, JNCI 2021)	P-0018841-T01-IM6	Colorectal Cancer	Colon Adenocarcinoma	KRAS	G13D	OncoKB: Oncogenic, level_4, level_r1;CIViC: diagnosticCount: 0, predictiveCount: 35, prognosticCount: 0, predisposingCount: 0, oncogenicCount: 0, functionalCount: 0;MyCancerGenome: present;CancerHotspot: yes;3DHotspot: yes			MutationAssessor: impact: medium, score: 3.025;SIFT: impact: deleterious, score: 0.04;Polyphen-2: impact: benign, score: 0.44	Missense_Mutation	SNP	Diploid	4452	SOMATIC	Unknown	MSKCC	12	25398281	25398281	C	T	12:g.25398281C>T	ENST00000311936.3:c.38G>A	0.15		92	506		596	68	45327		Conflicting_interpretations_of_pathogenicity(Pathogenic(6)|Uncertain_significance(1))			40	EO	Over_35			60.6	0		0	IMPACT468	0
Colorectal Cancer (MSK, JNCI 2021)	P-0021232-T01-IM6	Colorectal Cancer	Colon Adenocarcinoma	KRAS	G13D	OncoKB: Oncogenic, level_4, level_r1;CIViC: diagnosticCount: 0, predictiveCount: 35, prognosticCount: 0, predisposingCount: 0, oncogenicCount: 0, functionalCount: 0;MyCancerGenome: present;CancerHotspot: yes;3DHotspot: yes			MutationAssessor: impact: medium, score: 3.025;SIFT: impact: deleterious, score: 0.04;Polyphen-2: impact: benign, score: 0.44	Missense_Mutation	SNP	Diploid	4452	SOMATIC	Unknown	MSKCC	12	25398281	25398281	C	T	12:g.25398281C>T	ENST00000311936.3:c.38G>A	0.39		276	436		961	7	45327		Conflicting_interpretations_of_pathogenicity(Pathogenic(6)|Uncertain_significance(1))			41	EO	Over_35	26.7	OW	6.1	0	BRBPR	0.0478	IMPACT468	0			MSS
Colorectal Cancer (MSK, JNCI 2021)	P-0022797-T01-IM6	Colorectal Cancer	Colon Adenocarcinoma	KRAS	G13D	OncoKB: Oncogenic, level_4, level_r1;CIViC: diagnosticCount: 0, predictiveCount: 35, prognosticCount: 0, predisposingCount: 0, oncogenicCount: 0, functionalCount: 0;MyCancerGenome: present;CancerHotspot: yes;3DHotspot: yes			MutationAssessor: impact: medium, score: 3.025;SIFT: impact: deleterious, score: 0.04;Polyphen-2: impact: benign, score: 0.44	Missense_Mutation	SNP	Diploid	4452	SOMATIC	Unknown	MSKCC	12	25398281	25398281	C	T	12:g.25398281C>T	ENST00000311936.3:c.38G>A	0.15	0.0011	88	507	1	882	6	45327		Conflicting_interpretations_of_pathogenicity(Pathogenic(6)|Uncertain_significance(1))			31	EO	Under_35	24.8	NW	5.3	0	ABDOMINAL PAIN, BLOATING/ABDOMINAL GIRTH/PELVIC PRESSURE,PAIN	0.1483	IMPACT468	0	1		MSS
Colorectal Cancer (MSK, JNCI 2021)	P-0022917-T01-IM6	Colorectal Cancer	Colon Adenocarcinoma	KRAS	G13D	OncoKB: Oncogenic, level_4, level_r1;CIViC: diagnosticCount: 0, predictiveCount: 35, prognosticCount: 0, predisposingCount: 0, oncogenicCount: 0, functionalCount: 0;MyCancerGenome: present;CancerHotspot: yes;3DHotspot: yes			MutationAssessor: impact: medium, score: 3.025;SIFT: impact: deleterious, score: 0.04;Polyphen-2: impact: benign, score: 0.44	Missense_Mutation	SNP	Diploid	4452	SOMATIC	Unknown	MSKCC	12	25398281	25398281	C	T	12:g.25398281C>T	ENST00000311936.3:c.38G>A	0.06		34	524		775	3	45327		Conflicting_interpretations_of_pathogenicity(Pathogenic(6)|Uncertain_significance(1))			46	EO	Over_35	22.7	NW	2.6	0	BRBPR; OTHER	0.0129	IMPACT468	0	0		MSS
Colorectal Cancer (MSK, JNCI 2021)	P-0024204-T01-IM6	Colorectal Cancer	Colorectal Adenocarcinoma	KRAS	G13D	OncoKB: Oncogenic, level_4, level_r1;CIViC: diagnosticCount: 0, predictiveCount: 35, prognosticCount: 0, predisposingCount: 0, oncogenicCount: 0, functionalCount: 0;MyCancerGenome: present;CancerHotspot: yes;3DHotspot: yes			MutationAssessor: impact: medium, score: 3.025;SIFT: impact: deleterious, score: 0.04;Polyphen-2: impact: benign, score: 0.44	Missense_Mutation	SNP	Diploid	4452	SOMATIC	Unknown	MSKCC	12	25398281	25398281	C	T	12:g.25398281C>T	ENST00000311936.3:c.38G>A	0.15	0.0012	126	702	1	801	9	45327		Conflicting_interpretations_of_pathogenicity(Pathogenic(6)|Uncertain_significance(1))			37	EO	Over_35	33.4	OB	7.9	1	ABDOMINAL PAIN, BLOATING/ABDOMINAL GIRTH/PELVIC PRESSURE,PAIN	0.0491	IMPACT468	1	1		MSS
Colorectal Cancer (MSK, JNCI 2021)	P-0029584-T01-IM6	Colorectal Cancer	Colon Adenocarcinoma	KRAS	G13D	OncoKB: Oncogenic, level_4, level_r1;CIViC: diagnosticCount: 0, predictiveCount: 35, prognosticCount: 0, predisposingCount: 0, oncogenicCount: 0, functionalCount: 0;MyCancerGenome: present;CancerHotspot: yes;3DHotspot: yes			MutationAssessor: impact: medium, score: 3.025;SIFT: impact: deleterious, score: 0.04;Polyphen-2: impact: benign, score: 0.44	Missense_Mutation	SNP	Diploid	4452	SOMATIC	Unknown	MSKCC	12	25398281	25398281	C	T	12:g.25398281C>T	ENST00000311936.3:c.38G>A	0.11		69	534		458	8	45327		Conflicting_interpretations_of_pathogenicity(Pathogenic(6)|Uncertain_significance(1))			46	EO	Over_35	24.3	NW	7	0	CHANGE IN BOWEL HABITS	0	IMPACT468	0	1		MSS
Colorectal Cancer (MSK, JNCI 2021)	P-0032464-T01-IM6	Colorectal Cancer	Colorectal Adenocarcinoma	KRAS	G13D	OncoKB: Oncogenic, level_4, level_r1;CIViC: diagnosticCount: 0, predictiveCount: 35, prognosticCount: 0, predisposingCount: 0, oncogenicCount: 0, functionalCount: 0;MyCancerGenome: present;CancerHotspot: yes;3DHotspot: yes			MutationAssessor: impact: medium, score: 3.025;SIFT: impact: deleterious, score: 0.04;Polyphen-2: impact: benign, score: 0.44	Missense_Mutation	SNP	Diploid	4452	SOMATIC	Unknown	MSKCC	12	25398281	25398281	C	T	12:g.25398281C>T	ENST00000311936.3:c.38G>A	0.23		150	511		458	8	45327		Conflicting_interpretations_of_pathogenicity(Pathogenic(6)|Uncertain_significance(1))			48	EO	Over_35	30.2	OB	7	0		0.2385	IMPACT468	0	0		MSS
Colorectal Cancer (MSK, JNCI 2021)	P-0032667-T01-IM6	Colorectal Cancer	Colon Adenocarcinoma	KRAS	G13D	OncoKB: Oncogenic, level_4, level_r1;CIViC: diagnosticCount: 0, predictiveCount: 35, prognosticCount: 0, predisposingCount: 0, oncogenicCount: 0, functionalCount: 0;MyCancerGenome: present;CancerHotspot: yes;3DHotspot: yes			MutationAssessor: impact: medium, score: 3.025;SIFT: impact: deleterious, score: 0.04;Polyphen-2: impact: benign, score: 0.44	Missense_Mutation	SNP	Diploid	4452	SOMATIC	Unknown	MSKCC	12	25398281	25398281	C	T	12:g.25398281C>T	ENST00000311936.3:c.38G>A	0.39		194	303		525	5	45327		Conflicting_interpretations_of_pathogenicity(Pathogenic(6)|Uncertain_significance(1))			47	EO	Over_35	20.1	NW	4.4	0	BRBPR	0.3359	IMPACT468	0	0		MSS
Colorectal Cancer (MSK, JNCI 2021)	P-0033503-T01-IM6	Colorectal Cancer	Colon Adenocarcinoma	KRAS	G13D	OncoKB: Oncogenic, level_4, level_r1;CIViC: diagnosticCount: 0, predictiveCount: 35, prognosticCount: 0, predisposingCount: 0, oncogenicCount: 0, functionalCount: 0;MyCancerGenome: present;CancerHotspot: yes;3DHotspot: yes			MutationAssessor: impact: medium, score: 3.025;SIFT: impact: deleterious, score: 0.04;Polyphen-2: impact: benign, score: 0.44	Missense_Mutation	SNP	Diploid	4452	SOMATIC	Unknown	MSKCC	12	25398281	25398281	C	T	12:g.25398281C>T	ENST00000311936.3:c.38G>A	0.27		176	486		586	46	45327		Conflicting_interpretations_of_pathogenicity(Pathogenic(6)|Uncertain_significance(1))			28	EO	Under_35	30.6	OB	40.4	0	BRBPR, WEIGHT LOSS	0.1019	IMPACT468	0			MSI
Colorectal Cancer (MSK, JNCI 2021)	P-0035707-T01-IM6	Colorectal Cancer	Colorectal Adenocarcinoma	KRAS	G13D	OncoKB: Oncogenic, level_4, level_r1;CIViC: diagnosticCount: 0, predictiveCount: 35, prognosticCount: 0, predisposingCount: 0, oncogenicCount: 0, functionalCount: 0;MyCancerGenome: present;CancerHotspot: yes;3DHotspot: yes			MutationAssessor: impact: medium, score: 3.025;SIFT: impact: deleterious, score: 0.04;Polyphen-2: impact: benign, score: 0.44	Missense_Mutation	SNP	Diploid	4452	SOMATIC	Unknown	MSKCC	12	25398281	25398281	C	T	12:g.25398281C>T	ENST00000311936.3:c.38G>A	0.23		187	611		445	12	45327		Conflicting_interpretations_of_pathogenicity(Pathogenic(6)|Uncertain_significance(1))			48	EO	Over_35	31.2	OB	10.5	0	UPPER GI SX; OTHER	0.0895	IMPACT468	0	0		MSS
Colorectal Cancer (MSK, JNCI 2021)	P-0036666-T01-IM6	Colorectal Cancer	Rectal Adenocarcinoma	KRAS	G13D	OncoKB: Oncogenic, level_4, level_r1;CIViC: diagnosticCount: 0, predictiveCount: 35, prognosticCount: 0, predisposingCount: 0, oncogenicCount: 0, functionalCount: 0;MyCancerGenome: present;CancerHotspot: yes;3DHotspot: yes			MutationAssessor: impact: medium, score: 3.025;SIFT: impact: deleterious, score: 0.04;Polyphen-2: impact: benign, score: 0.44	Missense_Mutation	SNP	Diploid	4452	SOMATIC	Unknown	MSKCC	12	25398281	25398281	C	T	12:g.25398281C>T	ENST00000311936.3:c.38G>A	0.09		63	659		569	7	45327		Conflicting_interpretations_of_pathogenicity(Pathogenic(6)|Uncertain_significance(1))			42	EO	Over_35	24.3	NW	6.1	0	CHANGE IN BOWEL HABITS	0.0248	IMPACT468	0			MSS
Colorectal Cancer (MSK, JNCI 2021)	P-0037243-T01-IM6	Colorectal Cancer	Colorectal Adenocarcinoma	KRAS	G13D	OncoKB: Oncogenic, level_4, level_r1;CIViC: diagnosticCount: 0, predictiveCount: 35, prognosticCount: 0, predisposingCount: 0, oncogenicCount: 0, functionalCount: 0;MyCancerGenome: present;CancerHotspot: yes;3DHotspot: yes			MutationAssessor: impact: medium, score: 3.025;SIFT: impact: deleterious, score: 0.04;Polyphen-2: impact: benign, score: 0.44	Missense_Mutation	SNP	Diploid	4452	SOMATIC	Unknown	MSKCC	12	25398281	25398281	C	T	12:g.25398281C>T	ENST00000311936.3:c.38G>A	0.18		123	543		358	7	45327		Conflicting_interpretations_of_pathogenicity(Pathogenic(6)|Uncertain_significance(1))			26	EO	Under_35	21.5	NW	6.1	0	BRBPR; CHANGE IN BOWEL HABITS	0.0298	IMPACT468	0			MSS
Colorectal Cancer (MSK, JNCI 2021)	P-0037410-T01-IM6	Colorectal Cancer	Colon Adenocarcinoma	KRAS	G13D	OncoKB: Oncogenic, level_4, level_r1;CIViC: diagnosticCount: 0, predictiveCount: 35, prognosticCount: 0, predisposingCount: 0, oncogenicCount: 0, functionalCount: 0;MyCancerGenome: present;CancerHotspot: yes;3DHotspot: yes			MutationAssessor: impact: medium, score: 3.025;SIFT: impact: deleterious, score: 0.04;Polyphen-2: impact: benign, score: 0.44	Missense_Mutation	SNP	Diploid	4452	SOMATIC	Unknown	MSKCC	12	25398281	25398281	C	T	12:g.25398281C>T	ENST00000311936.3:c.38G>A	0.15		66	378		452	117	45327		Conflicting_interpretations_of_pathogenicity(Pathogenic(6)|Uncertain_significance(1))			48	EO	Over_35	36.1	OB	102.7	0	BRBPR	0.0336	IMPACT468	0			MSI
Colorectal Cancer (MSK, JNCI 2021)	P-0037482-T01-IM6	Colorectal Cancer	Colon Adenocarcinoma	KRAS	G13D	OncoKB: Oncogenic, level_4, level_r1;CIViC: diagnosticCount: 0, predictiveCount: 35, prognosticCount: 0, predisposingCount: 0, oncogenicCount: 0, functionalCount: 0;MyCancerGenome: present;CancerHotspot: yes;3DHotspot: yes			MutationAssessor: impact: medium, score: 3.025;SIFT: impact: deleterious, score: 0.04;Polyphen-2: impact: benign, score: 0.44	Missense_Mutation	SNP	Diploid	4452	SOMATIC	Unknown	MSKCC	12	25398281	25398281	C	T	12:g.25398281C>T	ENST00000311936.3:c.38G>A	0.33		132	270		439	4	45327		Conflicting_interpretations_of_pathogenicity(Pathogenic(6)|Uncertain_significance(1))			33	EO	Under_35	21	NW	3.5	0	OTHER	0.485	IMPACT468	0	1		MSS
Colorectal Cancer (MSK, JNCI 2021)	P-0037532-T01-IM6	Colorectal Cancer	Colon Adenocarcinoma	KRAS	G13D	OncoKB: Oncogenic, level_4, level_r1;CIViC: diagnosticCount: 0, predictiveCount: 35, prognosticCount: 0, predisposingCount: 0, oncogenicCount: 0, functionalCount: 0;MyCancerGenome: present;CancerHotspot: yes;3DHotspot: yes			MutationAssessor: impact: medium, score: 3.025;SIFT: impact: deleterious, score: 0.04;Polyphen-2: impact: benign, score: 0.44	Missense_Mutation	SNP	Diploid	4452	SOMATIC	Unknown	MSKCC	12	25398281	25398281	C	T	12:g.25398281C>T	ENST00000311936.3:c.38G>A	0.31		202	443		492	8	45327		Conflicting_interpretations_of_pathogenicity(Pathogenic(6)|Uncertain_significance(1))			47	EO	Over_35	29.3	OW	7	0	ABDOMINAL PAIN, BLOATING/ABDOMINAL GIRTH/PELVIC PRESSURE,PAIN	0.1494	IMPACT468	1	1		MSS
Colorectal Cancer (MSK, JNCI 2021)	P-0006207-T01-IM5	Colorectal Cancer	Colon Adenocarcinoma	KRAS	Q61K	OncoKB: Likely Oncogenic, level_4, level_r1;CIViC: diagnosticCount: 0, predictiveCount: 3, prognosticCount: 0, predisposingCount: 0, oncogenicCount: 0, functionalCount: 0;MyCancerGenome: present;CancerHotspot: yes;3DHotspot: yes			MutationAssessor: impact: medium, score: 3.165;SIFT: impact: deleterious, score: 0.01;Polyphen-2: impact: benign, score: 0.083	Missense_Mutation	SNP	Diploid	445	SOMATIC	Unknown	MSKCC	12	25380277	25380277	G	T	12:g.25380277G>T	ENST00000311936.3:c.181C>A	0.18		119	544		368	60	45356		Pathogenic			78	AO	AO	30.5	OB	59	0	BRBPR; change in bowel habits	0	IMPACT410	1			MSI
Colorectal Cancer (MSK, JNCI 2021)	P-0006460-T01-IM5	Colorectal Cancer	Rectal Adenocarcinoma	KRAS	Q61K	OncoKB: Likely Oncogenic, level_4, level_r1;CIViC: diagnosticCount: 0, predictiveCount: 3, prognosticCount: 0, predisposingCount: 0, oncogenicCount: 0, functionalCount: 0;MyCancerGenome: present;CancerHotspot: yes;3DHotspot: yes			MutationAssessor: impact: medium, score: 3.165;SIFT: impact: deleterious, score: 0.01;Polyphen-2: impact: benign, score: 0.083	Missense_Mutation	SNP	Diploid	445	SOMATIC	Unknown	MSKCC	12	25380277	25380277	G	T	12:g.25380277G>T	ENST00000311936.3:c.181C>A	0.17		181	882		543	6	45356		Pathogenic			60	AO	AO	31.1	OB	5.9	0	abdominal pain; BRBPR	0.0524	IMPACT410	0	0		MSS
Colorectal Cancer (MSK, JNCI 2021)	P-0008747-T01-IM5	Colorectal Cancer	Colon Adenocarcinoma	KRAS	Q61K	OncoKB: Likely Oncogenic, level_4, level_r1;CIViC: diagnosticCount: 0, predictiveCount: 3, prognosticCount: 0, predisposingCount: 0, oncogenicCount: 0, functionalCount: 0;MyCancerGenome: present;CancerHotspot: yes;3DHotspot: yes			MutationAssessor: impact: medium, score: 3.165;SIFT: impact: deleterious, score: 0.01;Polyphen-2: impact: benign, score: 0.083	Missense_Mutation	SNP	Diploid	445	SOMATIC	Unknown	MSKCC	12	25380277	25380277	G	T	12:g.25380277G>T	ENST00000311936.3:c.181C>A	0.27		289	766		547	4	45356		Pathogenic			69	AO	AO	28.6	OW	3.9	0	irregular bowel habits, blood in stool, fecal urgency and frequency	0.0518	IMPACT410	0	0		MSS
Colorectal Cancer (MSK, JNCI 2021)	P-0013785-T01-IM5	Colorectal Cancer	Colon Adenocarcinoma	KRAS	Q61R	OncoKB: Oncogenic, level_4, level_r1;CIViC: diagnosticCount: 0, predictiveCount: 3, prognosticCount: 0, predisposingCount: 0, oncogenicCount: 0, functionalCount: 0;MyCancerGenome: present;CancerHotspot: yes;3DHotspot: yes			MutationAssessor: impact: medium, score: 3.325;SIFT: impact: tolerated, score: 0.06;Polyphen-2: impact: benign, score: 0.122	Missense_Mutation	SNP	Diploid	445	SOMATIC	Unknown	MSKCC	12	25380276	25380276	T	C	12:g.25380276T>C	ENST00000311936.3:c.182A>G	0.4		421	636		695	4	45356		Conflicting_interpretations_of_pathogenicity(Pathogenic(1)|Uncertain_significance(2))			56	AO	AO	23.6	NW	3.9	0	found incidentally during routine colonoscopy	0.3142	IMPACT410	0	0		MSS
Colorectal Cancer (MSK, JNCI 2021)	P-0008819-T01-IM5	Colorectal Cancer	Rectal Adenocarcinoma	KRAS	Q61H	OncoKB: Oncogenic, level_4, level_r1;CIViC: diagnosticCount: 0, predictiveCount: 7, prognosticCount: 0, predisposingCount: 0, oncogenicCount: 1, functionalCount: 0;MyCancerGenome: present;CancerHotspot: yes;3DHotspot: yes			MutationAssessor: impact: medium, score: 3.08;SIFT: impact: deleterious, score: 0;Polyphen-2: impact: benign, score: 0.121	Missense_Mutation	SNP	Diploid	445	SOMATIC	Unknown	MSKCC	12	25380275	25380275	T	A	12:g.25380275T>A	ENST00000311936.3:c.183A>T	0.25		19	58		557	4	45356		Pathogenic/Likely_pathogenic			64	AO	AO	21.4	NW	3.9	0	abdominal pain	0.0975	IMPACT410	0			MSS
Colorectal Cancer (MSK, JNCI 2021)	P-0034753-T01-IM6	Colorectal Cancer	Colorectal Adenocarcinoma	KRAS	Q61H	OncoKB: Oncogenic, level_4, level_r1;CIViC: diagnosticCount: 0, predictiveCount: 7, prognosticCount: 0, predisposingCount: 0, oncogenicCount: 1, functionalCount: 0;MyCancerGenome: present;CancerHotspot: yes;3DHotspot: yes			MutationAssessor: impact: medium, score: 3.08;SIFT: impact: deleterious, score: 0;Polyphen-2: impact: benign, score: 0.121	Missense_Mutation	SNP	Diploid	445	SOMATIC	Unknown	MSKCC	12	25380275	25380275	T	A	12:g.25380275T>A	ENST00000311936.3:c.183A>T	0.59		529	374		578	9	45356		Pathogenic/Likely_pathogenic			46	EO	Over_35	32.8	OB	7.9	0	SCREENING COLONOSCOPY	0.3087	IMPACT468	0			MSS
Colorectal Cancer (MSK, JNCI 2021)	P-0037940-T01-IM6	Colorectal Cancer	Medullary Carcinoma of the Colon	KRAS	Q61H	OncoKB: Oncogenic, level_4, level_r1;CIViC: diagnosticCount: 0, predictiveCount: 7, prognosticCount: 0, predisposingCount: 0, oncogenicCount: 1, functionalCount: 0;MyCancerGenome: present;CancerHotspot: yes;3DHotspot: yes			MutationAssessor: impact: medium, score: 3.08;SIFT: impact: deleterious, score: 0;Polyphen-2: impact: benign, score: 0.121	Missense_Mutation	SNP	Diploid	445	SOMATIC	Unknown	MSKCC	12	25380275	25380275	T	A	12:g.25380275T>A	ENST00000311936.3:c.183A>T	0.26		171	499		494	98	45356		Pathogenic/Likely_pathogenic			37	EO	Over_35			86			0	IMPACT468
Colorectal Cancer (MSK, JNCI 2021)	P-0038746-T01-IM6	Colorectal Cancer	Rectal Adenocarcinoma	KRAS	Q61H	OncoKB: Oncogenic, level_4, level_r1;CIViC: diagnosticCount: 0, predictiveCount: 7, prognosticCount: 0, predisposingCount: 0, oncogenicCount: 1, functionalCount: 0;MyCancerGenome: present;CancerHotspot: yes;3DHotspot: yes			MutationAssessor: impact: medium, score: 3.08;SIFT: impact: deleterious, score: 0;Polyphen-2: impact: benign, score: 0.121	Missense_Mutation	SNP	Diploid	445	SOMATIC	Unknown	MSKCC	12	25380275	25380275	T	A	12:g.25380275T>A	ENST00000311936.3:c.183A>T	0.09	0.0017	82	832	1	587	5	45356		Pathogenic/Likely_pathogenic			44	EO	Over_35			4.4	0		0.0182	IMPACT468	0			MSS
Colorectal Cancer (MSK, JNCI 2021)	P-0010138-T01-IM5	Colorectal Cancer	Rectal Adenocarcinoma	KRAS	Q61L	OncoKB: Oncogenic, level_4, level_r1;CIViC: diagnosticCount: 0, predictiveCount: 4, prognosticCount: 0, predisposingCount: 0, oncogenicCount: 0, functionalCount: 0;MyCancerGenome: present;CancerHotspot: yes;3DHotspot: yes			MutationAssessor: impact: medium, score: 2.865;SIFT: impact: deleterious, score: 0;Polyphen-2: impact: possibly_damaging, score: 0.631	Missense_Mutation	SNP	Diploid	445	SOMATIC	Unknown	MSKCC	12	25380276	25380276	T	A	12:g.25380276T>A	ENST00000311936.3:c.182A>T	0.15		124	690		541	4	45356		Pathogenic			43	EO	Over_35	23.2	NW	3.9	0	ABDOMINAL PAIN, BLOATING/ABDOMINAL GIRTH/PELVIC PRESSURE,PAIN	0.0921	IMPACT410	0	1		MSS
Colorectal Cancer (MSK, JNCI 2021)	P-0012418-T01-IM5	Colorectal Cancer	Colon Adenocarcinoma	KRAS	G13C	OncoKB: Oncogenic, level_4, level_r1;CIViC: diagnosticCount: 0, predictiveCount: 4, prognosticCount: 0, predisposingCount: 0, oncogenicCount: 0, functionalCount: 0;MyCancerGenome: present;CancerHotspot: yes;3DHotspot: yes			MutationAssessor: impact: medium, score: 2.3;SIFT: impact: deleterious, score: 0.02;Polyphen-2: impact: probably_damaging, score: 0.997	Missense_Mutation	SNP	Diploid	4452	SOMATIC	Unknown	MSKCC	12	25398282	25398282	C	A	12:g.25398282C>A	ENST00000311936.3:c.37G>T	0.04		29	782		888	7	45327		Pathogenic/Likely_pathogenic			58	AO	AO	37.7	OB	6.9	0	rectal bleeding	0.2004	IMPACT410	0	0		MSS
Colorectal Cancer (MSK, JNCI 2021)	P-0009403-T02-IM5	Colorectal Cancer	Colon Adenocarcinoma	KRAS	Q61K	OncoKB: Likely Oncogenic, level_4, level_r1;CIViC: diagnosticCount: 0, predictiveCount: 3, prognosticCount: 0, predisposingCount: 0, oncogenicCount: 0, functionalCount: 0;MyCancerGenome: present;CancerHotspot: yes;3DHotspot: yes			MutationAssessor: NA;SIFT: NA;Polyphen-2: NA	Missense_Mutation	DNP	Diploid	445	SOMATIC	Unknown	MSKCC	12	25380277	25380278	GA	TT	12:g.25380277_25380278delinsTT	ENST00000311936.3:c.180_181delinsAA	0.13		125	833		668	35	45356					81	AO	AO	31.8	OB	34.4	0	anemia	0.0018	IMPACT410	1			MSI
Colorectal Cancer (MSK, JNCI 2021)	P-0011264-T01-IM5	Colorectal Cancer	Colon Adenocarcinoma	KRAS	Q61K	OncoKB: Likely Oncogenic, level_4, level_r1;CIViC: diagnosticCount: 0, predictiveCount: 3, prognosticCount: 0, predisposingCount: 0, oncogenicCount: 0, functionalCount: 0;MyCancerGenome: present;CancerHotspot: yes;3DHotspot: yes			MutationAssessor: NA;SIFT: NA;Polyphen-2: NA	Missense_Mutation	DNP	Diploid	445	SOMATIC	Unknown	MSKCC	12	25380277	25380278	GA	TT	12:g.25380277_25380278delinsTT	ENST00000311936.3:c.180_181delinsAA	0.22	0.0025	215	755	1	393	10	45356					61	AO	AO	18.1	UW	9.8	0	anemia	0.1289	IMPACT410	0	0		MSS
Colorectal Cancer (MSK, JNCI 2021)	P-0003611-T01-IM5	Colorectal Cancer	Colon Adenocarcinoma	KRAS	Q61R	OncoKB: Oncogenic, level_4, level_r1;CIViC: diagnosticCount: 0, predictiveCount: 3, prognosticCount: 0, predisposingCount: 0, oncogenicCount: 0, functionalCount: 0;MyCancerGenome: present;CancerHotspot: yes;3DHotspot: yes			MutationAssessor: NA;SIFT: impact: tolerated, score: 0.06;Polyphen-2: impact: benign, score: 0.122	Missense_Mutation	DNP	Diploid	445	SOMATIC	Unknown	MSKCC	12	25380275	25380276	TT	GC	12:g.25380275_25380276delinsGC	ENST00000311936.3:c.182_183delinsGC	0.15		104	567		323	10	45356					67	AO	AO	29.6	OW	9.8	0	BRBPR; Change in bowel habits; rectal pain	0.2458	IMPACT410	1	0		MSS
Colorectal Cancer (MSK, JNCI 2021)	P-0004960-T01-IM5	Colorectal Cancer	Rectal Adenocarcinoma	KRAS	K117N	OncoKB: Oncogenic, level_4, level_r1;CIViC: diagnosticCount: 0, predictiveCount: 1, prognosticCount: 0, predisposingCount: 0, oncogenicCount: 0, functionalCount: 0;MyCancerGenome: present;CancerHotspot: yes;3DHotspot: no			MutationAssessor: impact: high, score: 4.71;SIFT: impact: deleterious, score: 0.01;Polyphen-2: impact: probably_damaging, score: 0.994	Missense_Mutation	SNP	Diploid	16	SOMATIC	Unknown	MSKCC	12	25378647	25378647	T	A	12:g.25378647T>A	ENST00000311936.3:c.351A>T	0.21		223	851		422	11	45387		Pathogenic			50	AO	AO	23.8	NW	10.8	0	BRBPR; Abdominal pain	0.0989	IMPACT410	1	1		MSS
Colorectal Cancer (MSK, JNCI 2021)	P-0009703-T01-IM5	Colorectal Cancer	Rectal Adenocarcinoma	KRAS	K117N	OncoKB: Oncogenic, level_4, level_r1;CIViC: diagnosticCount: 0, predictiveCount: 1, prognosticCount: 0, predisposingCount: 0, oncogenicCount: 0, functionalCount: 0;MyCancerGenome: present;CancerHotspot: yes;3DHotspot: no			MutationAssessor: impact: high, score: 4.71;SIFT: impact: deleterious, score: 0.01;Polyphen-2: impact: probably_damaging, score: 0.994	Missense_Mutation	SNP	Diploid	16	SOMATIC	Unknown	MSKCC	12	25378647	25378647	T	A	12:g.25378647T>A	ENST00000311936.3:c.351A>T	0.35	0.002	480	904	1	493	3	45387		Pathogenic			71	AO	AO	21.2	NW	3	0	RLQ pain	0.0102	IMPACT410	1	0		MSS
Colorectal Cancer (MSK, JNCI 2021)	P-0011510-T01-IM5	Colorectal Cancer	Rectal Adenocarcinoma	KRAS	K117N	OncoKB: Oncogenic, level_4, level_r1;CIViC: diagnosticCount: 0, predictiveCount: 1, prognosticCount: 0, predisposingCount: 0, oncogenicCount: 0, functionalCount: 0;MyCancerGenome: present;CancerHotspot: yes;3DHotspot: no			MutationAssessor: impact: high, score: 4.71;SIFT: impact: deleterious, score: 0.01;Polyphen-2: impact: probably_damaging, score: 0.994	Missense_Mutation	SNP	Diploid	16	SOMATIC	Unknown	MSKCC	12	25378647	25378647	T	A	12:g.25378647T>A	ENST00000311936.3:c.351A>T	0.29		318	791		370	6	45387		Pathogenic			57	AO	AO	34.9	OB	5.9	0	incidentally found on colonoscopy	0.123	IMPACT410	0			MSS
Colorectal Cancer (MSK, JNCI 2021)	P-0000988-T01-IM3	Colorectal Cancer	Rectal Adenocarcinoma	KRAS	A146T	OncoKB: Oncogenic, level_4, level_r1;CIViC: diagnosticCount: 0, predictiveCount: 8, prognosticCount: 0, predisposingCount: 1, oncogenicCount: 1, functionalCount: 0;MyCancerGenome: present;CancerHotspot: yes;3DHotspot: no			MutationAssessor: impact: medium, score: 3.28;SIFT: impact: deleterious, score: 0.03;Polyphen-2: impact: possibly_damaging, score: 0.844	Missense_Mutation	SNP	Diploid	140	UNKNOWN	NA	MSKCC	12	25378562	25378562	C	T	12:g.25378562C>T	ENST00000311936.3:c.436G>A	0.57		530	393		245	9	45387		Conflicting_interpretations_of_pathogenicity(Pathogenic(1)|Likely_pathogenic(1)|Uncertain_significance(2))			58	AO	AO	27.7	OW	10	0	rectal pressure and pain	0.3862	IMPACT341	1	0		MSS
Colorectal Cancer (MSK, JNCI 2021)	P-0001470-T01-IM3	Colorectal Cancer	Colon Adenocarcinoma	KRAS	A146T	OncoKB: Oncogenic, level_4, level_r1;CIViC: diagnosticCount: 0, predictiveCount: 8, prognosticCount: 0, predisposingCount: 1, oncogenicCount: 1, functionalCount: 0;MyCancerGenome: present;CancerHotspot: yes;3DHotspot: no			MutationAssessor: impact: medium, score: 3.28;SIFT: impact: deleterious, score: 0.03;Polyphen-2: impact: possibly_damaging, score: 0.844	Missense_Mutation	SNP	Diploid	140	SOMATIC	Unknown	MSKCC	12	25378562	25378562	C	T	12:g.25378562C>T	ENST00000311936.3:c.436G>A	0.44		39	50		321	5	45387		Conflicting_interpretations_of_pathogenicity(Pathogenic(1)|Likely_pathogenic(1)|Uncertain_significance(2))			55	AO	AO	28.6	OW	5.6	0	incidentally found on scan	0.2269	IMPACT341	1	0		MSS
Colorectal Cancer (MSK, JNCI 2021)	P-0002025-T01-IM3	Colorectal Cancer	Colon Adenocarcinoma	KRAS	A146T	OncoKB: Oncogenic, level_4, level_r1;CIViC: diagnosticCount: 0, predictiveCount: 8, prognosticCount: 0, predisposingCount: 1, oncogenicCount: 1, functionalCount: 0;MyCancerGenome: present;CancerHotspot: yes;3DHotspot: no			MutationAssessor: impact: medium, score: 3.28;SIFT: impact: deleterious, score: 0.03;Polyphen-2: impact: possibly_damaging, score: 0.844	Missense_Mutation	SNP	Diploid	140	SOMATIC	Unknown	MSKCC	12	25378562	25378562	C	T	12:g.25378562C>T	ENST00000311936.3:c.436G>A	0.55		288	239		536	5	45387		Conflicting_interpretations_of_pathogenicity(Pathogenic(1)|Likely_pathogenic(1)|Uncertain_significance(2))			78	AO	AO	34.5	OB	5.6	0	Anemia	0.2891	IMPACT341	0	0		MSS
Colorectal Cancer (MSK, JNCI 2021)	P-0002855-T01-IM3	Colorectal Cancer	Colon Adenocarcinoma	KRAS	A146T	OncoKB: Oncogenic, level_4, level_r1;CIViC: diagnosticCount: 0, predictiveCount: 8, prognosticCount: 0, predisposingCount: 1, oncogenicCount: 1, functionalCount: 0;MyCancerGenome: present;CancerHotspot: yes;3DHotspot: no			MutationAssessor: impact: medium, score: 3.28;SIFT: impact: deleterious, score: 0.03;Polyphen-2: impact: possibly_damaging, score: 0.844	Missense_Mutation	SNP	Diploid	140	SOMATIC	Unknown	MSKCC	12	25378562	25378562	C	T	12:g.25378562C>T	ENST00000311936.3:c.436G>A	0.46	0.0029	349	414	1	341	5	45387		Conflicting_interpretations_of_pathogenicity(Pathogenic(1)|Likely_pathogenic(1)|Uncertain_significance(2))			44	EO	Over_35	43.3	OB	5.6	0	ABDOMINAL PAIN, BLOATING/ABDOMINAL GIRTH/PELVIC PRESSURE,PAIN	0.0896	IMPACT341	1	0		MSS
Colorectal Cancer (MSK, JNCI 2021)	P-0004494-T01-IM5	Colorectal Cancer	Colon Adenocarcinoma	KRAS	A146T	OncoKB: Oncogenic, level_4, level_r1;CIViC: diagnosticCount: 0, predictiveCount: 8, prognosticCount: 0, predisposingCount: 1, oncogenicCount: 1, functionalCount: 0;MyCancerGenome: present;CancerHotspot: yes;3DHotspot: no			MutationAssessor: impact: medium, score: 3.28;SIFT: impact: deleterious, score: 0.03;Polyphen-2: impact: possibly_damaging, score: 0.844	Missense_Mutation	SNP	Diploid	140	SOMATIC	Unknown	MSKCC	12	25378562	25378562	C	T	12:g.25378562C>T	ENST00000311936.3:c.436G>A	0.19		116	489		448	10	45387		Conflicting_interpretations_of_pathogenicity(Pathogenic(1)|Likely_pathogenic(1)|Uncertain_significance(2))			71	AO	AO	26	OW	9.8	1	incidentally found on colonoscopy	0.0961	IMPACT410	1	0		MSS
Colorectal Cancer (MSK, JNCI 2021)	P-0004566-T01-IM5	Colorectal Cancer	Colon Adenocarcinoma	KRAS	A146T	OncoKB: Oncogenic, level_4, level_r1;CIViC: diagnosticCount: 0, predictiveCount: 8, prognosticCount: 0, predisposingCount: 1, oncogenicCount: 1, functionalCount: 0;MyCancerGenome: present;CancerHotspot: yes;3DHotspot: no			MutationAssessor: impact: medium, score: 3.28;SIFT: impact: deleterious, score: 0.03;Polyphen-2: impact: possibly_damaging, score: 0.844	Missense_Mutation	SNP	Diploid	140	SOMATIC	Unknown	MSKCC	12	25378562	25378562	C	T	12:g.25378562C>T	ENST00000311936.3:c.436G>A	0.64		303	170		438	7	45387		Conflicting_interpretations_of_pathogenicity(Pathogenic(1)|Likely_pathogenic(1)|Uncertain_significance(2))			56	AO	AO	23.7	NW	6.9	0	brbpr	0.0818	IMPACT410	0	0		MSS
Colorectal Cancer (MSK, JNCI 2021)	P-0004823-T01-IM5	Colorectal Cancer	Colon Adenocarcinoma	KRAS	A146T	OncoKB: Oncogenic, level_4, level_r1;CIViC: diagnosticCount: 0, predictiveCount: 8, prognosticCount: 0, predisposingCount: 1, oncogenicCount: 1, functionalCount: 0;MyCancerGenome: present;CancerHotspot: yes;3DHotspot: no			MutationAssessor: impact: medium, score: 3.28;SIFT: impact: deleterious, score: 0.03;Polyphen-2: impact: possibly_damaging, score: 0.844	Missense_Mutation	SNP	Diploid	140	SOMATIC	Unknown	MSKCC	12	25378562	25378562	C	T	12:g.25378562C>T	ENST00000311936.3:c.436G>A	0.61		163	103		318	6	45387		Conflicting_interpretations_of_pathogenicity(Pathogenic(1)|Likely_pathogenic(1)|Uncertain_significance(2))			66	AO	AO	32.7	OB	5.9	0	incidentally found on colonoscopy	0.2862	IMPACT410	1	0		MSS
Colorectal Cancer (MSK, JNCI 2021)	P-0004897-T01-IM5	Colorectal Cancer	Colon Adenocarcinoma	KRAS	A146T	OncoKB: Oncogenic, level_4, level_r1;CIViC: diagnosticCount: 0, predictiveCount: 8, prognosticCount: 0, predisposingCount: 1, oncogenicCount: 1, functionalCount: 0;MyCancerGenome: present;CancerHotspot: yes;3DHotspot: no			MutationAssessor: impact: medium, score: 3.28;SIFT: impact: deleterious, score: 0.03;Polyphen-2: impact: possibly_damaging, score: 0.844	Missense_Mutation	SNP	Diploid	140	SOMATIC	Unknown	MSKCC	12	25378562	25378562	C	T	12:g.25378562C>T	ENST00000311936.3:c.436G>A	0.57		271	208		308	7	45387		Conflicting_interpretations_of_pathogenicity(Pathogenic(1)|Likely_pathogenic(1)|Uncertain_significance(2))			51	AO	AO	21.5	NW	6.9	0	Abdominal pain	0.2492	IMPACT410	1	0		MSS
Colorectal Cancer (MSK, JNCI 2021)	P-0006170-T01-IM5	Colorectal Cancer	Colon Adenocarcinoma	KRAS	A146T	OncoKB: Oncogenic, level_4, level_r1;CIViC: diagnosticCount: 0, predictiveCount: 8, prognosticCount: 0, predisposingCount: 1, oncogenicCount: 1, functionalCount: 0;MyCancerGenome: present;CancerHotspot: yes;3DHotspot: no			MutationAssessor: impact: medium, score: 3.28;SIFT: impact: deleterious, score: 0.03;Polyphen-2: impact: possibly_damaging, score: 0.844	Missense_Mutation	SNP	Diploid	140	SOMATIC	Unknown	MSKCC	12	25378562	25378562	C	T	12:g.25378562C>T	ENST00000311936.3:c.436G>A	0.14		68	424		263	56	45387		Conflicting_interpretations_of_pathogenicity(Pathogenic(1)|Likely_pathogenic(1)|Uncertain_significance(2))			52	AO	AO	27.2	OW	55.1	0	SCREENING COLONOSCOPY	0.002	IMPACT410	0			MSI
Colorectal Cancer (MSK, JNCI 2021)	P-0006960-T01-IM5	Colorectal Cancer	Colon Adenocarcinoma	KRAS	A146T	OncoKB: Oncogenic, level_4, level_r1;CIViC: diagnosticCount: 0, predictiveCount: 8, prognosticCount: 0, predisposingCount: 1, oncogenicCount: 1, functionalCount: 0;MyCancerGenome: present;CancerHotspot: yes;3DHotspot: no			MutationAssessor: impact: medium, score: 3.28;SIFT: impact: deleterious, score: 0.03;Polyphen-2: impact: possibly_damaging, score: 0.844	Missense_Mutation	SNP	Diploid	140	SOMATIC	Unknown	MSKCC	12	25378562	25378562	C	T	12:g.25378562C>T	ENST00000311936.3:c.436G>A	0.31		147	329		431	351	45387		Conflicting_interpretations_of_pathogenicity(Pathogenic(1)|Likely_pathogenic(1)|Uncertain_significance(2))			60	AO	AO	18.3	UW	345.3	1	BRBPR; Change in bowel habits	0.1037	IMPACT410	0			MSI
Colorectal Cancer (MSK, JNCI 2021)	P-0009712-T01-IM5	Colorectal Cancer	Rectal Adenocarcinoma	KRAS	A146T	OncoKB: Oncogenic, level_4, level_r1;CIViC: diagnosticCount: 0, predictiveCount: 8, prognosticCount: 0, predisposingCount: 1, oncogenicCount: 1, functionalCount: 0;MyCancerGenome: present;CancerHotspot: yes;3DHotspot: no			MutationAssessor: impact: medium, score: 3.28;SIFT: impact: deleterious, score: 0.03;Polyphen-2: impact: possibly_damaging, score: 0.844	Missense_Mutation	SNP	Diploid	140	SOMATIC	Unknown	MSKCC	12	25378562	25378562	C	T	12:g.25378562C>T	ENST00000311936.3:c.436G>A	0.04	0.0022	53	1241	1	449	6	45387		Conflicting_interpretations_of_pathogenicity(Pathogenic(1)|Likely_pathogenic(1)|Uncertain_significance(2))			48	EO	Over_35	27.5	OW	5.9		OTHER	0.0041	IMPACT410		0		MSS
Colorectal Cancer (MSK, JNCI 2021)	P-0010365-T01-IM5	Colorectal Cancer	Rectal Adenocarcinoma	KRAS	A146T	OncoKB: Oncogenic, level_4, level_r1;CIViC: diagnosticCount: 0, predictiveCount: 8, prognosticCount: 0, predisposingCount: 1, oncogenicCount: 1, functionalCount: 0;MyCancerGenome: present;CancerHotspot: yes;3DHotspot: no			MutationAssessor: impact: medium, score: 3.28;SIFT: impact: deleterious, score: 0.03;Polyphen-2: impact: possibly_damaging, score: 0.844	Missense_Mutation	SNP	Diploid	140	SOMATIC	Unknown	MSKCC	12	25378562	25378562	C	T	12:g.25378562C>T	ENST00000311936.3:c.436G>A	0.3		291	691		421	7	45387		Conflicting_interpretations_of_pathogenicity(Pathogenic(1)|Likely_pathogenic(1)|Uncertain_significance(2))			32	EO	Under_35	27.1	OW	6.9	0	ABDOMINAL PAIN, BLOATING/ABDOMINAL GIRTH/PELVIC PRESSURE,PAIN	0.2363	IMPACT410	0	1		MSS
Colorectal Cancer (MSK, JNCI 2021)	P-0010680-T01-IM5	Colorectal Cancer	Colon Adenocarcinoma	KRAS	A146T	OncoKB: Oncogenic, level_4, level_r1;CIViC: diagnosticCount: 0, predictiveCount: 8, prognosticCount: 0, predisposingCount: 1, oncogenicCount: 1, functionalCount: 0;MyCancerGenome: present;CancerHotspot: yes;3DHotspot: no			MutationAssessor: impact: medium, score: 3.28;SIFT: impact: deleterious, score: 0.03;Polyphen-2: impact: possibly_damaging, score: 0.844	Missense_Mutation	SNP	Diploid	140	SOMATIC	Unknown	MSKCC	12	25378562	25378562	C	T	12:g.25378562C>T	ENST00000311936.3:c.436G>A	0.4		386	572		357	14	45387		Conflicting_interpretations_of_pathogenicity(Pathogenic(1)|Likely_pathogenic(1)|Uncertain_significance(2))			58	AO	AO	24.3	NW	13.8	1	BRBPR	0.2566	IMPACT410	1	1		MSS
Colorectal Cancer (MSK, JNCI 2021)	P-0011324-T01-IM5	Colorectal Cancer	Colon Adenocarcinoma	KRAS	A146T	OncoKB: Oncogenic, level_4, level_r1;CIViC: diagnosticCount: 0, predictiveCount: 8, prognosticCount: 0, predisposingCount: 1, oncogenicCount: 1, functionalCount: 0;MyCancerGenome: present;CancerHotspot: yes;3DHotspot: no			MutationAssessor: impact: medium, score: 3.28;SIFT: impact: deleterious, score: 0.03;Polyphen-2: impact: possibly_damaging, score: 0.844	Missense_Mutation	SNP	Diploid	140	SOMATIC	Unknown	MSKCC	12	25378562	25378562	C	T	12:g.25378562C>T	ENST00000311936.3:c.436G>A	0.27		196	542		245	62	45387		Conflicting_interpretations_of_pathogenicity(Pathogenic(1)|Likely_pathogenic(1)|Uncertain_significance(2))			61	AO	AO	33.9	OB	61	0	Anemia	0.0536	IMPACT410	1			MSI
Colorectal Cancer (MSK, JNCI 2021)	P-0013404-T01-IM5	Colorectal Cancer	Rectal Adenocarcinoma	KRAS	A146T	OncoKB: Oncogenic, level_4, level_r1;CIViC: diagnosticCount: 0, predictiveCount: 8, prognosticCount: 0, predisposingCount: 1, oncogenicCount: 1, functionalCount: 0;MyCancerGenome: present;CancerHotspot: yes;3DHotspot: no			MutationAssessor: impact: medium, score: 3.28;SIFT: impact: deleterious, score: 0.03;Polyphen-2: impact: possibly_damaging, score: 0.844	Missense_Mutation	SNP	Diploid	140	SOMATIC	Unknown	MSKCC	12	25378562	25378562	C	T	12:g.25378562C>T	ENST00000311936.3:c.436G>A	0.25		113	339		595	9	45387		Conflicting_interpretations_of_pathogenicity(Pathogenic(1)|Likely_pathogenic(1)|Uncertain_significance(2))			55	AO	AO	23.8	NW	8.9	0	Screening colonoscopy	0.3105	IMPACT410	0	0		MSS
Colorectal Cancer (MSK, JNCI 2021)	P-0022111-T01-IM6	Colorectal Cancer	Rectal Adenocarcinoma	KRAS	A146T	OncoKB: Oncogenic, level_4, level_r1;CIViC: diagnosticCount: 0, predictiveCount: 8, prognosticCount: 0, predisposingCount: 1, oncogenicCount: 1, functionalCount: 0;MyCancerGenome: present;CancerHotspot: yes;3DHotspot: no			MutationAssessor: impact: medium, score: 3.28;SIFT: impact: deleterious, score: 0.03;Polyphen-2: impact: possibly_damaging, score: 0.844	Missense_Mutation	SNP	Diploid	140	SOMATIC	Unknown	MSKCC	12	25378562	25378562	C	T	12:g.25378562C>T	ENST00000311936.3:c.436G>A	0.1		65	619		528	94	45387		Conflicting_interpretations_of_pathogenicity(Pathogenic(1)|Likely_pathogenic(1)|Uncertain_significance(2))			36	EO	Over_35			82.5	0		0.0065	IMPACT468	0
Colorectal Cancer (MSK, JNCI 2021)	P-0024425-T01-IM6	Colorectal Cancer	Rectal Adenocarcinoma	KRAS	A146T	OncoKB: Oncogenic, level_4, level_r1;CIViC: diagnosticCount: 0, predictiveCount: 8, prognosticCount: 0, predisposingCount: 1, oncogenicCount: 1, functionalCount: 0;MyCancerGenome: present;CancerHotspot: yes;3DHotspot: no			MutationAssessor: impact: medium, score: 3.28;SIFT: impact: deleterious, score: 0.03;Polyphen-2: impact: possibly_damaging, score: 0.844	Missense_Mutation	SNP	Diploid	140	SOMATIC	Unknown	MSKCC	12	25378562	25378562	C	T	12:g.25378562C>T	ENST00000311936.3:c.436G>A	0.3		160	365		482	8	45387		Conflicting_interpretations_of_pathogenicity(Pathogenic(1)|Likely_pathogenic(1)|Uncertain_significance(2))			43	EO	Over_35	22.9	NW	7	0	BRBPR	0.0577	IMPACT468	0			MSS
Colorectal Cancer (MSK, JNCI 2021)	P-0025715-T01-IM6	Colorectal Cancer	Colon Adenocarcinoma	KRAS	A146T	OncoKB: Oncogenic, level_4, level_r1;CIViC: diagnosticCount: 0, predictiveCount: 8, prognosticCount: 0, predisposingCount: 1, oncogenicCount: 1, functionalCount: 0;MyCancerGenome: present;CancerHotspot: yes;3DHotspot: no			MutationAssessor: impact: medium, score: 3.28;SIFT: impact: deleterious, score: 0.03;Polyphen-2: impact: possibly_damaging, score: 0.844	Missense_Mutation	SNP	Diploid	140	SOMATIC	Unknown	MSKCC	12	25378562	25378562	C	T	12:g.25378562C>T	ENST00000311936.3:c.436G>A	0.35	0.0021	180	331	1	478	67	45387		Conflicting_interpretations_of_pathogenicity(Pathogenic(1)|Likely_pathogenic(1)|Uncertain_significance(2))			18	EO	Under_35			58.8	0		0.0338	IMPACT468	0
Colorectal Cancer (MSK, JNCI 2021)	P-0028580-T01-IM6	Colorectal Cancer	Mucinous Adenocarcinoma of the Colon and Rectum	KRAS	A146T	OncoKB: Oncogenic, level_4, level_r1;CIViC: diagnosticCount: 0, predictiveCount: 8, prognosticCount: 0, predisposingCount: 1, oncogenicCount: 1, functionalCount: 0;MyCancerGenome: present;CancerHotspot: yes;3DHotspot: no			MutationAssessor: impact: medium, score: 3.28;SIFT: impact: deleterious, score: 0.03;Polyphen-2: impact: possibly_damaging, score: 0.844	Missense_Mutation	SNP	Diploid	140	SOMATIC	Unknown	MSKCC	12	25378562	25378562	C	T	12:g.25378562C>T	ENST00000311936.3:c.436G>A	0.4		167	248		485	87	45387		Conflicting_interpretations_of_pathogenicity(Pathogenic(1)|Likely_pathogenic(1)|Uncertain_significance(2))			43	EO	Over_35	23.3	NW	76.4	0	BRBPR	0.1871	IMPACT468	0			MSI
Colorectal Cancer (MSK, JNCI 2021)	P-0029834-T01-IM6	Colorectal Cancer	Rectal Adenocarcinoma	KRAS	A146T	OncoKB: Oncogenic, level_4, level_r1;CIViC: diagnosticCount: 0, predictiveCount: 8, prognosticCount: 0, predisposingCount: 1, oncogenicCount: 1, functionalCount: 0;MyCancerGenome: present;CancerHotspot: yes;3DHotspot: no			MutationAssessor: impact: medium, score: 3.28;SIFT: impact: deleterious, score: 0.03;Polyphen-2: impact: possibly_damaging, score: 0.844	Missense_Mutation	SNP	Diploid	140	SOMATIC	Unknown	MSKCC	12	25378562	25378562	C	T	12:g.25378562C>T	ENST00000311936.3:c.436G>A	0.52		404	376		412	8	45387		Conflicting_interpretations_of_pathogenicity(Pathogenic(1)|Likely_pathogenic(1)|Uncertain_significance(2))			47	EO	Over_35	24.1	NW	7	0	ANEMIA	0.4698	IMPACT468	0	0		MSS
Colorectal Cancer (MSK, JNCI 2021)	P-0035326-T01-IM6	Colorectal Cancer	Colorectal Adenocarcinoma	KRAS	A146T	OncoKB: Oncogenic, level_4, level_r1;CIViC: diagnosticCount: 0, predictiveCount: 8, prognosticCount: 0, predisposingCount: 1, oncogenicCount: 1, functionalCount: 0;MyCancerGenome: present;CancerHotspot: yes;3DHotspot: no			MutationAssessor: impact: medium, score: 3.28;SIFT: impact: deleterious, score: 0.03;Polyphen-2: impact: possibly_damaging, score: 0.844	Missense_Mutation	SNP	Diploid	140	SOMATIC	Unknown	MSKCC	12	25378562	25378562	C	T	12:g.25378562C>T	ENST00000311936.3:c.436G>A	0.3		246	570		524	6	45387		Conflicting_interpretations_of_pathogenicity(Pathogenic(1)|Likely_pathogenic(1)|Uncertain_significance(2))			38	EO	Over_35	31.8	OB	5.3	0	BRBPR; CHANGE IN BOWEL HABITS	0.1834	IMPACT468	1			MSS
Colorectal Cancer (MSK, JNCI 2021)	P-0035917-T01-IM6	Colorectal Cancer	Colon Adenocarcinoma	KRAS	A146T	OncoKB: Oncogenic, level_4, level_r1;CIViC: diagnosticCount: 0, predictiveCount: 8, prognosticCount: 0, predisposingCount: 1, oncogenicCount: 1, functionalCount: 0;MyCancerGenome: present;CancerHotspot: yes;3DHotspot: no			MutationAssessor: impact: medium, score: 3.28;SIFT: impact: deleterious, score: 0.03;Polyphen-2: impact: possibly_damaging, score: 0.844	Missense_Mutation	SNP	Diploid	140	SOMATIC	Unknown	MSKCC	12	25378562	25378562	C	T	12:g.25378562C>T	ENST00000311936.3:c.436G>A	0.72	0.0037	341	133	2	541	8	45387		Conflicting_interpretations_of_pathogenicity(Pathogenic(1)|Likely_pathogenic(1)|Uncertain_significance(2))			38	EO	Over_35	25.1	OW	7	0	BRBPR; WEIGHT LOSS	0.1314	IMPACT468	0	0		MSS
Colorectal Cancer (MSK, JNCI 2021)	P-0036459-T01-IM6	Colorectal Cancer	Colorectal Adenocarcinoma	KRAS	A146T	OncoKB: Oncogenic, level_4, level_r1;CIViC: diagnosticCount: 0, predictiveCount: 8, prognosticCount: 0, predisposingCount: 1, oncogenicCount: 1, functionalCount: 0;MyCancerGenome: present;CancerHotspot: yes;3DHotspot: no			MutationAssessor: impact: medium, score: 3.28;SIFT: impact: deleterious, score: 0.03;Polyphen-2: impact: possibly_damaging, score: 0.844	Missense_Mutation	SNP	Diploid	140	SOMATIC	Unknown	MSKCC	12	25378562	25378562	C	T	12:g.25378562C>T	ENST00000311936.3:c.436G>A	0.32		140	300		392	8	45387		Conflicting_interpretations_of_pathogenicity(Pathogenic(1)|Likely_pathogenic(1)|Uncertain_significance(2))			41	EO	Over_35	29.4	OW	7	0	CHANGE IN BOWEL HABITS	0.0808	IMPACT468	0			MSS
Colorectal Cancer (MSK, JNCI 2021)	P-0037228-T01-IM6	Colorectal Cancer	Colorectal Adenocarcinoma	KRAS	A146T	OncoKB: Oncogenic, level_4, level_r1;CIViC: diagnosticCount: 0, predictiveCount: 8, prognosticCount: 0, predisposingCount: 1, oncogenicCount: 1, functionalCount: 0;MyCancerGenome: present;CancerHotspot: yes;3DHotspot: no			MutationAssessor: impact: medium, score: 3.28;SIFT: impact: deleterious, score: 0.03;Polyphen-2: impact: possibly_damaging, score: 0.844	Missense_Mutation	SNP	Diploid	140	SOMATIC	Unknown	MSKCC	12	25378562	25378562	C	T	12:g.25378562C>T	ENST00000311936.3:c.436G>A	0.23	0.0019	121	411	1	534	28	45387		Conflicting_interpretations_of_pathogenicity(Pathogenic(1)|Likely_pathogenic(1)|Uncertain_significance(2))			47	EO	Over_35	26.4	OW	24.6	1	ANEMIA; OTHER	0.2411	IMPACT468	1			MSS
Colorectal Cancer (MSK, JNCI 2021)	P-0018392-T01-IM6	Colorectal Cancer	Colon Adenocarcinoma	KRAS	A146V	OncoKB: Likely Oncogenic, level_4, level_r1;CIViC: diagnosticCount: 0, predictiveCount: 2, prognosticCount: 0, predisposingCount: 0, oncogenicCount: 0, functionalCount: 0;MyCancerGenome: present;CancerHotspot: yes;3DHotspot: no			MutationAssessor: impact: medium, score: 3.055;SIFT: impact: deleterious, score: 0.02;Polyphen-2: impact: possibly_damaging, score: 0.884	Missense_Mutation	SNP	Diploid	140	SOMATIC	Unknown	MSKCC	12	25378561	25378561	G	A	12:g.25378561G>A	ENST00000311936.3:c.437C>T	0.47		101	116		283	4	45387		Pathogenic			39	EO	Over_35	23	NW	3.5	0	ABDOMINAL PAIN, BLOATING/ABDOMINAL GIRTH/PELVIC PRESSURE,PAIN	0.1637	IMPACT468	0	0		MSS
Colorectal Cancer (MSK, JNCI 2021)	P-0020144-T01-IM6	Colorectal Cancer	Colon Adenocarcinoma	KRAS	A146P	OncoKB: Likely Oncogenic, level_4, level_r1;CIViC: diagnosticCount: 0, predictiveCount: 2, prognosticCount: 0, predisposingCount: 0, oncogenicCount: 0, functionalCount: 0;MyCancerGenome: present;CancerHotspot: yes;3DHotspot: no			MutationAssessor: impact: high, score: 4.05;SIFT: impact: deleterious, score: 0;Polyphen-2: impact: probably_damaging, score: 1	Missense_Mutation	SNP	Diploid	140	SOMATIC	Unknown	MSKCC	12	25378562	25378562	C	G	12:g.25378562C>G	ENST00000311936.3:c.436G>C	0.26		119	333		1072	40	45387		Pathogenic/Likely_pathogenic				EO		25.5	OW	35.1	0	Anemia; bloating; weight loss	0	IMPACT468	0
Colorectal Cancer (MSK, JNCI 2021)	P-0015416-T01-IM6	Colorectal Cancer	Colon Adenocarcinoma	KRAS	A59T	OncoKB: Oncogenic, level_4, level_r1;CIViC: diagnosticCount: 0, predictiveCount: 0, prognosticCount: 0, predisposingCount: 0, oncogenicCount: 0, functionalCount: 0;MyCancerGenome: not present;CancerHotspot: yes;3DHotspot: yes			MutationAssessor: impact: high, score: 3.59;SIFT: impact: tolerated, score: 0.06;Polyphen-2: impact: possibly_damaging, score: 0.692	Missense_Mutation	SNP	Diploid	27	SOMATIC	Unknown	MSKCC	12	25380283	25380283	C	T	12:g.25380283C>T	ENST00000311936.3:c.175G>A	0.18		187	840		605	120	45356		Pathogenic/Likely_pathogenic			32	EO	Under_35			105.3	0		0.033	IMPACT468	0
Colorectal Cancer (MSK, JNCI 2021)	P-0027929-T01-IM6	Colorectal Cancer	Rectal Adenocarcinoma	KRAS	A59T	OncoKB: Oncogenic, level_4, level_r1;CIViC: diagnosticCount: 0, predictiveCount: 0, prognosticCount: 0, predisposingCount: 0, oncogenicCount: 0, functionalCount: 0;MyCancerGenome: not present;CancerHotspot: yes;3DHotspot: yes			MutationAssessor: impact: high, score: 3.59;SIFT: impact: tolerated, score: 0.06;Polyphen-2: impact: possibly_damaging, score: 0.692	Missense_Mutation	SNP	Diploid	27	SOMATIC	Unknown	MSKCC	12	25380283	25380283	C	T	12:g.25380283C>T	ENST00000311936.3:c.175G>A	0.3		250	592		462	419	45356		Pathogenic/Likely_pathogenic			31	EO	Under_35			368.6	0		0.0262	IMPACT468	0
Colorectal Cancer (MSK, JNCI 2021)	P-0029828-T01-IM6	Colorectal Cancer	Colon Adenocarcinoma	KRAS	L19F	OncoKB: Oncogenic, level_4, level_r1;CIViC: diagnosticCount: 0, predictiveCount: 0, prognosticCount: 0, predisposingCount: 0, oncogenicCount: 0, functionalCount: 0;MyCancerGenome: not present;CancerHotspot: yes;3DHotspot: no			MutationAssessor: impact: low, score: 1.83;SIFT: impact: deleterious, score: 0.01;Polyphen-2: impact: probably_damaging, score: 0.999	Missense_Mutation	SNP	Diploid	19	SOMATIC	Unknown	MSKCC	12	25398262	25398262	C	G	12:g.25398262C>G	ENST00000311936.3:c.57G>C	0.17		120	570		339	8	45327		Pathogenic/Likely_pathogenic			48	EO	Over_35	43.9	OB	7	0	ANEMIA	0.0132	IMPACT468	0	0		MSS
Colorectal Cancer (MSK, JNCI 2021)	P-0036503-T01-IM6	Colorectal Cancer	Colon Adenocarcinoma	KRAS	V14I	OncoKB: Likely Oncogenic, level_4, level_r1;CIViC: diagnosticCount: 0, predictiveCount: 0, prognosticCount: 0, predisposingCount: 1, oncogenicCount: 0, functionalCount: 0;MyCancerGenome: not present;CancerHotspot: no;3DHotspot: no			MutationAssessor: impact: medium, score: 3.07;SIFT: impact: deleterious, score: 0;Polyphen-2: impact: probably_damaging, score: 0.959	Missense_Mutation	SNP	Diploid	17	SOMATIC	Unknown	MSKCC	12	25398279	25398279	C	T	12:g.25398279C>T	ENST00000311936.3:c.40G>A	0.11		25	211		360	141	45327		Pathogenic			30	EO	Under_35	24.9	NW	123.8	0	BRBPR	0	IMPACT468	0			POLE
Colorectal Cancer (MSK, JNCI 2021)	P-0036503-T01-IM6	Colorectal Cancer	Colon Adenocarcinoma	KRAS	K117Q	OncoKB: Likely Oncogenic, level_4, level_r1;CIViC: NA;MyCancerGenome: present;CancerHotspot: yes;3DHotspot: no			MutationAssessor: impact: medium, score: 3.47;SIFT: impact: deleterious, score: 0.01;Polyphen-2: impact: probably_damaging, score: 0.966	Missense_Mutation	SNP	Diploid	16	SOMATIC	Unknown	MSKCC	12	25378649	25378649	T	G	12:g.25378649T>G	ENST00000311936.3:c.349A>C	0.22		75	260		346	141	45387					30	EO	Under_35	24.9	NW	123.8	0	BRBPR	0	IMPACT468	0			POLE
Colorectal Cancer (MSK, JNCI 2021)	P-0011366-T01-IM5	Colorectal Cancer	Colon Adenocarcinoma	KRAS	D33E	OncoKB: Oncogenic, level_4, level_r1;CIViC: NA;MyCancerGenome: not present;CancerHotspot: yes;3DHotspot: yes			MutationAssessor: impact: low, score: 1.26;SIFT: impact: tolerated, score: 0.08;Polyphen-2: impact: probably_damaging, score: 0.979	Missense_Mutation	SNP	Diploid	2	SOMATIC	Unknown	MSKCC	12	25398220	25398220	A	T	12:g.25398220A>T	ENST00000311936.3:c.99T>A	0.1	0.0026	145	1255	1	389	13	45327					63	AO	AO	17.9	UW	12.8	0	anemia	0.1515	IMPACT410	0	0		MSS
Colorectal Cancer (MSK, JNCI 2021)	P-0008063-T01-IM5	Colorectal Cancer	Colon Adenocarcinoma	KRAS	K5E	OncoKB: Likely Oncogenic, level_4, level_r1;CIViC: NA;MyCancerGenome: not present;CancerHotspot: yes;3DHotspot: no			MutationAssessor: impact: high, score: 3.645;SIFT: impact: deleterious, score: 0.03;Polyphen-2: impact: probably_damaging, score: 0.956	Missense_Mutation	SNP	Diploid	8	SOMATIC	Unknown	MSKCC	12	25398306	25398306	T	C	12:g.25398306T>C	ENST00000311936.3:c.13A>G	0.07		33	433		394	7	45327		Pathogenic/Likely_pathogenic			40	EO	Over_35	25.3	OW	6.9	0	ABDOMINAL PAIN, BLOATING/ABDOMINAL GIRTH/PELVIC PRESSURE,PAIN	0	IMPACT410	0	1		MSS
Colorectal Cancer (MSK, JNCI 2021)	P-0006960-T01-IM5	Colorectal Cancer	Colon Adenocarcinoma	KRAS	Q22H	OncoKB: Likely Oncogenic, level_4, level_r1;CIViC: NA;MyCancerGenome: not present;CancerHotspot: yes;3DHotspot: no			MutationAssessor: impact: medium, score: 3.27;SIFT: impact: deleterious, score: 0;Polyphen-2: impact: probably_damaging, score: 0.997	Missense_Mutation	SNP	Diploid	15	SOMATIC	Unknown	MSKCC	12	25398253	25398253	C	A	12:g.25398253C>A	ENST00000311936.3:c.66G>T	0.36		294	532		503	351	45327					60	AO	AO	18.3	UW	345.3	1	BRBPR; Change in bowel habits	0.1037	IMPACT410	0			MSI
Colorectal Cancer (MSK, JNCI 2021)	P-0037898-T01-IM6	Colorectal Cancer	Colon Adenocarcinoma	KRAS	E98*	OncoKB: Likely Neutral, level NA, resistance NA;CIViC: NA;MyCancerGenome: not present;CancerHotspot: no;3DHotspot: no			MutationAssessor: NA;SIFT: NA;Polyphen-2: NA	Nonsense_Mutation	SNP	Diploid	1	SOMATIC	Unknown	MSKCC	12	25378706	25378706	C	A	12:g.25378706C>A	ENST00000311936.3:c.292G>T	0.28		19	48		171	216	45387					29	EO	Under_35	20.1	NW	189.6	0	CHANGE IN BOWEL HABITS; WEIGHT LOSS	0.0126	IMPACT468	0			POLE
Colorectal Cancer (MSK, JNCI 2021)	P-0006612-T01-IM5	Colorectal Cancer	Colon Adenocarcinoma	KRAS	D57N	OncoKB: Likely Neutral, level NA, resistance NA;CIViC: NA;MyCancerGenome: not present;CancerHotspot: no;3DHotspot: no			MutationAssessor: impact: high, score: 4.345;SIFT: impact: deleterious, score: 0;Polyphen-2: impact: probably_damaging, score: 0.992	Missense_Mutation	SNP	Diploid	3	SOMATIC	Unknown	MSKCC	12	25380289	25380289	C	T	12:g.25380289C>T	ENST00000311936.3:c.169G>A	0.22		155	558		533	361	45356					70	AO	AO	29.7	OW	356.1	0	SCREENING COLONOSCOPY	0.0006	IMPACT410	1			POLE
Colorectal Cancer (MSK, JNCI 2021)	P-0010499-T01-IM5	Colorectal Cancer	Colon Adenocarcinoma	KRAS	D57N	OncoKB: Likely Neutral, level NA, resistance NA;CIViC: NA;MyCancerGenome: not present;CancerHotspot: no;3DHotspot: no			MutationAssessor: impact: high, score: 4.345;SIFT: impact: deleterious, score: 0;Polyphen-2: impact: probably_damaging, score: 0.992	Missense_Mutation	SNP	Diploid	3	SOMATIC	Unknown	MSKCC	12	25380289	25380289	C	T	12:g.25380289C>T	ENST00000311936.3:c.169G>A	0.14		124	774		297	156	45356					63	AO	AO	37.5	OB	153.5	1	blood in stool	0.0051	IMPACT410	1			POLE
Colorectal Cancer (MSK, JNCI 2021)	P-0007997-T01-IM5	Colorectal Cancer	Colon Adenocarcinoma	KRAS	I171Nfs*14	OncoKB: Unknown, level NA, resistance NA;CIViC: NA;MyCancerGenome: not present;CancerHotspot: no;3DHotspot: no			MutationAssessor: NA;SIFT: NA;Polyphen-2: NA	Frame_Shift_Ins	INS	Diploid		SOMATIC	Unknown	MSKCC	12	25368433	25368434	-	T	12:g.25368433_25368434insT	ENST00000311936.3:c.451-5589dup	0.16	0.0024	105	532	1	412	53						56	AO	AO		NW	52.1	0		0.0002	IMPACT410	1			MSI
Colorectal Cancer (MSK, JNCI 2021)	P-0002653-T01-IM3	Colorectal Cancer	Signet Ring Cell Adenocarcinoma of the Colon and Rectum	SMAD4	R361C	OncoKB: Likely Oncogenic, level NA, resistance NA;CIViC: diagnosticCount: 0, predictiveCount: 0, prognosticCount: 0, predisposingCount: 1, oncogenicCount: 0, functionalCount: 2;MyCancerGenome: present;CancerHotspot: yes;3DHotspot: yes			MutationAssessor: impact: high, score: 3.58;SIFT: impact: deleterious, score: 0;Polyphen-2: impact: probably_damaging, score: 1	Missense_Mutation	SNP	Diploid	67	SOMATIC	Unknown	MSKCC	18	48591918	48591918	C	T	18:g.48591918C>T	ENST00000342988.3:c.1081C>T	0.18		138	624		301	2	45547		Pathogenic			17	EO	Under_35	20.8	NW	2.2	0	ANEMIA	0.0022	IMPACT341	0	0		MSS
Colorectal Cancer (MSK, JNCI 2021)	P-0003753-T01-IM5	Colorectal Cancer	Rectal Adenocarcinoma	SMAD4	R361C	OncoKB: Likely Oncogenic, level NA, resistance NA;CIViC: diagnosticCount: 0, predictiveCount: 0, prognosticCount: 0, predisposingCount: 1, oncogenicCount: 0, functionalCount: 2;MyCancerGenome: present;CancerHotspot: yes;3DHotspot: yes			MutationAssessor: impact: high, score: 3.58;SIFT: impact: deleterious, score: 0;Polyphen-2: impact: probably_damaging, score: 1	Missense_Mutation	SNP	Diploid	67	SOMATIC	Unknown	MSKCC	18	48591918	48591918	C	T	18:g.48591918C>T	ENST00000342988.3:c.1081C>T	0.02		13	601		348	6	45547		Pathogenic			71	AO	AO	28.3	OW	5.9	0	BRBPR; anemia	0.032	IMPACT410	0	0		MSS
Colorectal Cancer (MSK, JNCI 2021)	P-0004494-T01-IM5	Colorectal Cancer	Colon Adenocarcinoma	SMAD4	R361C	OncoKB: Likely Oncogenic, level NA, resistance NA;CIViC: diagnosticCount: 0, predictiveCount: 0, prognosticCount: 0, predisposingCount: 1, oncogenicCount: 0, functionalCount: 2;MyCancerGenome: present;CancerHotspot: yes;3DHotspot: yes			MutationAssessor: impact: high, score: 3.58;SIFT: impact: deleterious, score: 0;Polyphen-2: impact: probably_damaging, score: 1	Missense_Mutation	SNP	Diploid	67	SOMATIC	Unknown	MSKCC	18	48591918	48591918	C	T	18:g.48591918C>T	ENST00000342988.3:c.1081C>T	0.03		14	421		489	10	45547		Pathogenic			71	AO	AO	26	OW	9.8	1	incidentally found on colonoscopy	0.0961	IMPACT410	1	0		MSS
Colorectal Cancer (MSK, JNCI 2021)	P-0007688-T01-IM5	Colorectal Cancer	Colon Adenocarcinoma	SMAD4	R361C	OncoKB: Likely Oncogenic, level NA, resistance NA;CIViC: diagnosticCount: 0, predictiveCount: 0, prognosticCount: 0, predisposingCount: 1, oncogenicCount: 0, functionalCount: 2;MyCancerGenome: present;CancerHotspot: yes;3DHotspot: yes			MutationAssessor: impact: high, score: 3.58;SIFT: impact: deleterious, score: 0;Polyphen-2: impact: probably_damaging, score: 1	Missense_Mutation	SNP	Diploid	67	SOMATIC	Unknown	MSKCC	18	48591918	48591918	C	T	18:g.48591918C>T	ENST00000342988.3:c.1081C>T	0.46		288	337		471	52	45547		Pathogenic			81	AO	AO	34.9	OB	52.1	0	anemia	0.0486	IMPACT410	1			MSI
Colorectal Cancer (MSK, JNCI 2021)	P-0010832-T01-IM5	Colorectal Cancer	Rectal Adenocarcinoma	SMAD4	R361C	OncoKB: Likely Oncogenic, level NA, resistance NA;CIViC: diagnosticCount: 0, predictiveCount: 0, prognosticCount: 0, predisposingCount: 1, oncogenicCount: 0, functionalCount: 2;MyCancerGenome: present;CancerHotspot: yes;3DHotspot: yes			MutationAssessor: impact: high, score: 3.58;SIFT: impact: deleterious, score: 0;Polyphen-2: impact: probably_damaging, score: 1	Missense_Mutation	SNP	Diploid	67	SOMATIC	Unknown	MSKCC	18	48591918	48591918	C	T	18:g.48591918C>T	ENST00000342988.3:c.1081C>T	0.22	0.002	74	260	1	502	6	45547		Pathogenic			25	EO	Under_35	19.1	NW	5.9	0	ABDOMINAL PAIN, BLOATING/ABDOMINAL GIRTH/PELVIC PRESSURE,PAIN	0.1491	IMPACT410	0	1		MSS
Colorectal Cancer (MSK, JNCI 2021)	P-0022555-T01-IM6	Colorectal Cancer	Colon Adenocarcinoma	SMAD4	R361C	OncoKB: Likely Oncogenic, level NA, resistance NA;CIViC: diagnosticCount: 0, predictiveCount: 0, prognosticCount: 0, predisposingCount: 1, oncogenicCount: 0, functionalCount: 2;MyCancerGenome: present;CancerHotspot: yes;3DHotspot: yes			MutationAssessor: impact: high, score: 3.58;SIFT: impact: deleterious, score: 0;Polyphen-2: impact: probably_damaging, score: 1	Missense_Mutation	SNP	Diploid	67	SOMATIC	Unknown	MSKCC	18	48591918	48591918	C	T	18:g.48591918C>T	ENST00000342988.3:c.1081C>T	0.37		164	274		753	11	45547		Pathogenic			37	EO	Over_35	24.4	NW	9.7	0	ABDOMINAL PAIN, BLOATING/ABDOMINAL GIRTH/PELVIC PRESSURE,PAIN	0.0908	IMPACT468	0	0		MSS
Colorectal Cancer (MSK, JNCI 2021)	P-0023616-T01-IM6	Colorectal Cancer	Rectal Adenocarcinoma	SMAD4	R361C	OncoKB: Likely Oncogenic, level NA, resistance NA;CIViC: diagnosticCount: 0, predictiveCount: 0, prognosticCount: 0, predisposingCount: 1, oncogenicCount: 0, functionalCount: 2;MyCancerGenome: present;CancerHotspot: yes;3DHotspot: yes			MutationAssessor: impact: high, score: 3.58;SIFT: impact: deleterious, score: 0;Polyphen-2: impact: probably_damaging, score: 1	Missense_Mutation	SNP	Diploid	67	SOMATIC	Unknown	MSKCC	18	48591918	48591918	C	T	18:g.48591918C>T	ENST00000342988.3:c.1081C>T	0.09		32	310		636	7	45547		Pathogenic			46	EO	Over_35	37.3	OB	6.1	0	ABDOMINAL PAIN, BLOATING/ABDOMINAL GIRTH/PELVIC PRESSURE,PAIN	0.1621	IMPACT468	0	1		MSS
Colorectal Cancer (MSK, JNCI 2021)	P-0024418-T01-IM6	Colorectal Cancer	Colon Adenocarcinoma	SMAD4	R361C	OncoKB: Likely Oncogenic, level NA, resistance NA;CIViC: diagnosticCount: 0, predictiveCount: 0, prognosticCount: 0, predisposingCount: 1, oncogenicCount: 0, functionalCount: 2;MyCancerGenome: present;CancerHotspot: yes;3DHotspot: yes			MutationAssessor: impact: high, score: 3.58;SIFT: impact: deleterious, score: 0;Polyphen-2: impact: probably_damaging, score: 1	Missense_Mutation	SNP	Diploid	67	SOMATIC	Unknown	MSKCC	18	48591918	48591918	C	T	18:g.48591918C>T	ENST00000342988.3:c.1081C>T	0.38		203	325		372	7	45547		Pathogenic			30	EO	Under_35	22.8	NW	6.1		ABDOMINAL PAIN, BLOATING/ABDOMINAL GIRTH/PELVIC PRESSURE,PAIN	0.1865	IMPACT468		1		MSS
Colorectal Cancer (MSK, JNCI 2021)	P-0030238-T01-IM6	Colorectal Cancer	Colon Adenocarcinoma	SMAD4	R361C	OncoKB: Likely Oncogenic, level NA, resistance NA;CIViC: diagnosticCount: 0, predictiveCount: 0, prognosticCount: 0, predisposingCount: 1, oncogenicCount: 0, functionalCount: 2;MyCancerGenome: present;CancerHotspot: yes;3DHotspot: yes			MutationAssessor: impact: high, score: 3.58;SIFT: impact: deleterious, score: 0;Polyphen-2: impact: probably_damaging, score: 1	Missense_Mutation	SNP	Diploid	67	SOMATIC	Unknown	MSKCC	18	48591918	48591918	C	T	18:g.48591918C>T	ENST00000342988.3:c.1081C>T	0.23		78	266		286	8	45547		Pathogenic			46	EO	Over_35	21.3	NW	7	0	BRBPR; ABDOMINAL PAIN, BLOATING/ABDOMINAL GIRTH/PELVIC PRESSURE,PAIN	0.2629	IMPACT468	0	0		MSS
Colorectal Cancer (MSK, JNCI 2021)	P-0006612-T01-IM5	Colorectal Cancer	Colon Adenocarcinoma	SMAD4	E330K	OncoKB: Likely Oncogenic, level NA, resistance NA;CIViC: diagnosticCount: 0, predictiveCount: 0, prognosticCount: 0, predisposingCount: 0, oncogenicCount: 0, functionalCount: 1;MyCancerGenome: present;CancerHotspot: yes;3DHotspot: no			MutationAssessor: impact: high, score: 4.14;SIFT: impact: deleterious, score: 0;Polyphen-2: impact: probably_damaging, score: 1	Missense_Mutation	SNP	Diploid	9	SOMATIC	Unknown	MSKCC	18	48591825	48591825	G	A	18:g.48591825G>A	ENST00000342988.3:c.988G>A	0.26		202	589		572	361	45547					70	AO	AO	29.7	OW	356.1	0	SCREENING COLONOSCOPY	0.0006	IMPACT410	1			POLE
Colorectal Cancer (MSK, JNCI 2021)	P-0008941-T01-IM5	Colorectal Cancer	Rectal Adenocarcinoma	SMAD4	E330K	OncoKB: Likely Oncogenic, level NA, resistance NA;CIViC: diagnosticCount: 0, predictiveCount: 0, prognosticCount: 0, predisposingCount: 0, oncogenicCount: 0, functionalCount: 1;MyCancerGenome: present;CancerHotspot: yes;3DHotspot: no			MutationAssessor: impact: high, score: 4.14;SIFT: impact: deleterious, score: 0;Polyphen-2: impact: probably_damaging, score: 1	Missense_Mutation	SNP	Diploid	9	SOMATIC	Unknown	MSKCC	18	48591825	48591825	G	A	18:g.48591825G>A	ENST00000342988.3:c.988G>A	0.37		333	566		542	6	45547					69	AO	AO	27	OW	5.9	0	Anemia	0.3332	IMPACT410	1			MSS
Colorectal Cancer (MSK, JNCI 2021)	P-0010118-T01-IM5	Colorectal Cancer	Signet Ring Cell Adenocarcinoma of the Colon and Rectum	SMAD4	E330K	OncoKB: Likely Oncogenic, level NA, resistance NA;CIViC: diagnosticCount: 0, predictiveCount: 0, prognosticCount: 0, predisposingCount: 0, oncogenicCount: 0, functionalCount: 1;MyCancerGenome: present;CancerHotspot: yes;3DHotspot: no			MutationAssessor: impact: high, score: 4.14;SIFT: impact: deleterious, score: 0;Polyphen-2: impact: probably_damaging, score: 1	Missense_Mutation	SNP	Diploid	9	SOMATIC	Unknown	MSKCC	18	48591825	48591825	G	A	18:g.48591825G>A	ENST00000342988.3:c.988G>A	0.07		57	725		574	4	45547					48	EO	Over_35	35.9	OW	3.9	1	BACK PAIN, SHOULDER PAIN/BACK PAIN/BONE PAIN	0.0383	IMPACT410	1
Colorectal Cancer (MSK, JNCI 2021)	P-0020681-T01-IM6	Colorectal Cancer	Colon Adenocarcinoma	SMAD4	E330K	OncoKB: Likely Oncogenic, level NA, resistance NA;CIViC: diagnosticCount: 0, predictiveCount: 0, prognosticCount: 0, predisposingCount: 0, oncogenicCount: 0, functionalCount: 1;MyCancerGenome: present;CancerHotspot: yes;3DHotspot: no			MutationAssessor: impact: high, score: 4.14;SIFT: impact: deleterious, score: 0;Polyphen-2: impact: probably_damaging, score: 1	Missense_Mutation	SNP	Diploid	9	SOMATIC	Unknown	MSKCC	18	48591825	48591825	G	A	18:g.48591825G>A	ENST00000342988.3:c.988G>A	0.07	0.0013	41	589	1	759	6	45547					39	EO	Over_35	30.4	OB	5.3	0	CHANGE IN BOWEL HABITS	0.0085	IMPACT468	0	1		MSS
Colorectal Cancer (MSK, JNCI 2021)	P-0003886-T01-IM5	Colorectal Cancer	Rectal Adenocarcinoma	SMAD4	G386D	OncoKB: Likely Oncogenic, level NA, resistance NA;CIViC: diagnosticCount: 0, predictiveCount: 0, prognosticCount: 0, predisposingCount: 0, oncogenicCount: 0, functionalCount: 1;MyCancerGenome: not present;CancerHotspot: yes;3DHotspot: yes			MutationAssessor: impact: high, score: 4.165;SIFT: impact: deleterious, score: 0.01;Polyphen-2: impact: probably_damaging, score: 1	Missense_Mutation	SNP	Diploid	22	SOMATIC	Unknown	MSKCC	18	48593406	48593406	G	A	18:g.48593406G>A	ENST00000342988.3:c.1157G>A	0.3		116	275		222	6	45577		Pathogenic/Likely_pathogenic			73	AO	AO	34.2	OB	5.9	0	incidentally found on colonoscopy	0.2685	IMPACT410	1	0		MSS
Colorectal Cancer (MSK, JNCI 2021)	P-0030231-T01-IM6	Colorectal Cancer	Colon Adenocarcinoma	SMAD4	G419V	OncoKB: Likely Oncogenic, level NA, resistance NA;CIViC: diagnosticCount: 0, predictiveCount: 0, prognosticCount: 0, predisposingCount: 0, oncogenicCount: 0, functionalCount: 1;MyCancerGenome: not present;CancerHotspot: yes;3DHotspot: no			MutationAssessor: impact: high, score: 3.81;SIFT: impact: deleterious, score: 0;Polyphen-2: impact: possibly_damaging, score: 0.811	Missense_Mutation	SNP	Diploid	4	SOMATIC	Unknown	MSKCC	18	48593505	48593505	G	T	18:g.48593505G>T	ENST00000342988.3:c.1256G>T	0.11		36	283		240	11	45577					38	EO	Over_35	33.6	OB	9.7		BRBPR	0.2067	IMPACT468		1		MSS
Colorectal Cancer (MSK, JNCI 2021)	P-0002339-T01-IM3	Colorectal Cancer	Mucinous Adenocarcinoma of the Colon and Rectum	SMAD4	R361H	OncoKB: Likely Oncogenic, level NA, resistance NA;CIViC: NA;MyCancerGenome: present;CancerHotspot: yes;3DHotspot: yes			MutationAssessor: impact: medium, score: 3.025;SIFT: impact: deleterious, score: 0.03;Polyphen-2: impact: probably_damaging, score: 0.999	Missense_Mutation	SNP	Diploid	67	SOMATIC	Unknown	MSKCC	18	48591919	48591919	G	A	18:g.48591919G>A	ENST00000342988.3:c.1082G>A	0.39	0.0025	295	453	1	406	7	45547		Pathogenic			76	AO	AO	32.8	OB	7.8	1	Anemia	0.0719	IMPACT341	1	0		MSS
Colorectal Cancer (MSK, JNCI 2021)	P-0004350-T01-IM5	Colorectal Cancer	Colon Adenocarcinoma	SMAD4	R361H	OncoKB: Likely Oncogenic, level NA, resistance NA;CIViC: NA;MyCancerGenome: present;CancerHotspot: yes;3DHotspot: yes			MutationAssessor: impact: medium, score: 3.025;SIFT: impact: deleterious, score: 0.03;Polyphen-2: impact: probably_damaging, score: 0.999	Missense_Mutation	SNP	Diploid	67	SOMATIC	Unknown	MSKCC	18	48591919	48591919	G	A	18:g.48591919G>A	ENST00000342988.3:c.1082G>A	0.27	0.0024	43	118	1	418	8	45547		Pathogenic			34	EO	Under_35	24.1	NW	7.9	0	ABDOMINAL PAIN, BLOATING/ABDOMINAL GIRTH/PELVIC PRESSURE,PAIN	0.252	IMPACT410	0	1		MSS
Colorectal Cancer (MSK, JNCI 2021)	P-0005548-T01-IM5	Colorectal Cancer	Colon Adenocarcinoma	SMAD4	R361H	OncoKB: Likely Oncogenic, level NA, resistance NA;CIViC: NA;MyCancerGenome: present;CancerHotspot: yes;3DHotspot: yes			MutationAssessor: impact: medium, score: 3.025;SIFT: impact: deleterious, score: 0.03;Polyphen-2: impact: probably_damaging, score: 0.999	Missense_Mutation	SNP	Diploid	67	SOMATIC	Unknown	MSKCC	18	48591919	48591919	G	A	18:g.48591919G>A	ENST00000342988.3:c.1082G>A	0.17		197	972		1158	69	45547		Pathogenic			53	AO	AO	29.7	OW	67.9	1	abdominal pain; change in bowel habits	0.0081	IMPACT410	1			MSI
Colorectal Cancer (MSK, JNCI 2021)	P-0006460-T01-IM5	Colorectal Cancer	Rectal Adenocarcinoma	SMAD4	R361H	OncoKB: Likely Oncogenic, level NA, resistance NA;CIViC: NA;MyCancerGenome: present;CancerHotspot: yes;3DHotspot: yes			MutationAssessor: impact: medium, score: 3.025;SIFT: impact: deleterious, score: 0.03;Polyphen-2: impact: probably_damaging, score: 0.999	Missense_Mutation	SNP	Diploid	67	SOMATIC	Unknown	MSKCC	18	48591919	48591919	G	A	18:g.48591919G>A	ENST00000342988.3:c.1082G>A	0.17		166	826		696	6	45547		Pathogenic			60	AO	AO	31.1	OB	5.9	0	abdominal pain; BRBPR	0.0524	IMPACT410	0	0		MSS
Colorectal Cancer (MSK, JNCI 2021)	P-0006612-T01-IM5	Colorectal Cancer	Colon Adenocarcinoma	SMAD4	R361H	OncoKB: Likely Oncogenic, level NA, resistance NA;CIViC: NA;MyCancerGenome: present;CancerHotspot: yes;3DHotspot: yes			MutationAssessor: impact: medium, score: 3.025;SIFT: impact: deleterious, score: 0.03;Polyphen-2: impact: probably_damaging, score: 0.999	Missense_Mutation	SNP	Diploid	67	SOMATIC	Unknown	MSKCC	18	48591919	48591919	G	A	18:g.48591919G>A	ENST00000342988.3:c.1082G>A	0.24	0.0017	175	569	1	581	361	45547		Pathogenic			70	AO	AO	29.7	OW	356.1	0	SCREENING COLONOSCOPY	0.0006	IMPACT410	1			POLE
Colorectal Cancer (MSK, JNCI 2021)	P-0009016-T01-IM5	Colorectal Cancer	Colon Adenocarcinoma	SMAD4	R361H	OncoKB: Likely Oncogenic, level NA, resistance NA;CIViC: NA;MyCancerGenome: present;CancerHotspot: yes;3DHotspot: yes			MutationAssessor: impact: medium, score: 3.025;SIFT: impact: deleterious, score: 0.03;Polyphen-2: impact: probably_damaging, score: 0.999	Missense_Mutation	SNP	Diploid	67	SOMATIC	Unknown	MSKCC	18	48591919	48591919	G	A	18:g.48591919G>A	ENST00000342988.3:c.1082G>A	0.04	0.0023	34	784	1	438	5	45547		Pathogenic			39	EO	Over_35	23.8	NW	4.9	0	OTHER	0	IMPACT410		1		MSS
Colorectal Cancer (MSK, JNCI 2021)	P-0010330-T01-IM5	Colorectal Cancer	Rectal Adenocarcinoma	SMAD4	R361H	OncoKB: Likely Oncogenic, level NA, resistance NA;CIViC: NA;MyCancerGenome: present;CancerHotspot: yes;3DHotspot: yes			MutationAssessor: impact: medium, score: 3.025;SIFT: impact: deleterious, score: 0.03;Polyphen-2: impact: probably_damaging, score: 0.999	Missense_Mutation	SNP	Diploid	67	SOMATIC	Unknown	MSKCC	18	48591919	48591919	G	A	18:g.48591919G>A	ENST00000342988.3:c.1082G>A	0.1	0.0067	66	564	4	597	10	45547		Pathogenic			74	AO	AO	24.8	NW	9.8	0	Anemia	0.026	IMPACT410	0	1		MSS
Colorectal Cancer (MSK, JNCI 2021)	P-0010432-T01-IM5	Colorectal Cancer	Rectal Adenocarcinoma	SMAD4	R361H	OncoKB: Likely Oncogenic, level NA, resistance NA;CIViC: NA;MyCancerGenome: present;CancerHotspot: yes;3DHotspot: yes			MutationAssessor: impact: medium, score: 3.025;SIFT: impact: deleterious, score: 0.03;Polyphen-2: impact: probably_damaging, score: 0.999	Missense_Mutation	SNP	Diploid	67	SOMATIC	Unknown	MSKCC	18	48591919	48591919	G	A	18:g.48591919G>A	ENST00000342988.3:c.1082G>A	0.04	0.0016	37	912	1	617	6	45547		Pathogenic			48	EO	Over_35	24.7	NW	5.9	0	ANEMIA; FATIGUE	0.0006	IMPACT410	0			MSS
Colorectal Cancer (MSK, JNCI 2021)	P-0024928-T01-IM6	Colorectal Cancer	Colon Adenocarcinoma	SMAD4	R361H	OncoKB: Likely Oncogenic, level NA, resistance NA;CIViC: NA;MyCancerGenome: present;CancerHotspot: yes;3DHotspot: yes			MutationAssessor: impact: medium, score: 3.025;SIFT: impact: deleterious, score: 0.03;Polyphen-2: impact: probably_damaging, score: 0.999	Missense_Mutation	SNP	Diploid	67	SOMATIC	Unknown	MSKCC	18	48591919	48591919	G	A	18:g.48591919G>A	ENST00000342988.3:c.1082G>A	0.19		62	273		419	49	45547		Pathogenic			48	EO	Over_35	25.9	OW	43	0	ANEMIA	0.0263	IMPACT468	0			MSI
Colorectal Cancer (MSK, JNCI 2021)	P-0025161-T01-IM6	Colorectal Cancer	Colorectal Adenocarcinoma	SMAD4	R361H	OncoKB: Likely Oncogenic, level NA, resistance NA;CIViC: NA;MyCancerGenome: present;CancerHotspot: yes;3DHotspot: yes			MutationAssessor: impact: medium, score: 3.025;SIFT: impact: deleterious, score: 0.03;Polyphen-2: impact: probably_damaging, score: 0.999	Missense_Mutation	SNP	Diploid	67	SOMATIC	Unknown	MSKCC	18	48591919	48591919	G	A	18:g.48591919G>A	ENST00000342988.3:c.1082G>A	0.03	0.0023	15	476	1	428	11	45547		Pathogenic			40	EO	Over_35	25.8	OW	9.7	0	ABDOMINAL PAIN, BLOATING/ABDOMINAL GIRTH/PELVIC PRESSURE,PAIN; WEIGHT LOSS	0.1644	IMPACT468	0	1		MSS
Colorectal Cancer (MSK, JNCI 2021)	P-0030191-T01-IM6	Colorectal Cancer	Colorectal Adenocarcinoma	SMAD4	R361H	OncoKB: Likely Oncogenic, level NA, resistance NA;CIViC: NA;MyCancerGenome: present;CancerHotspot: yes;3DHotspot: yes			MutationAssessor: impact: medium, score: 3.025;SIFT: impact: deleterious, score: 0.03;Polyphen-2: impact: probably_damaging, score: 0.999	Missense_Mutation	SNP	Diploid	67	SOMATIC	Unknown	MSKCC	18	48591919	48591919	G	A	18:g.48591919G>A	ENST00000342988.3:c.1082G>A	0.1		22	200		337	4	45547		Pathogenic			39	EO	Over_35	23.1	NW	3.5	0	ABDOMINAL PAIN, BLOATING/ABDOMINAL GIRTH/PELVIC PRESSURE,PAIN	0.0522	IMPACT468	0	0		MSS
Colorectal Cancer (MSK, JNCI 2021)	P-0031802-T01-IM6	Colorectal Cancer	Rectal Adenocarcinoma	SMAD4	R361H	OncoKB: Likely Oncogenic, level NA, resistance NA;CIViC: NA;MyCancerGenome: present;CancerHotspot: yes;3DHotspot: yes			MutationAssessor: impact: medium, score: 3.025;SIFT: impact: deleterious, score: 0.03;Polyphen-2: impact: probably_damaging, score: 0.999	Missense_Mutation	SNP	Diploid	67	SOMATIC	Unknown	MSKCC	18	48591919	48591919	G	A	18:g.48591919G>A	ENST00000342988.3:c.1082G>A	0.24	0.0033	99	319	1	303	10	45547		Pathogenic			44	EO	Over_35	23.6	NW	8.8	0	BRBPR	0.1878	IMPACT468	0			MSS
Colorectal Cancer (MSK, JNCI 2021)	P-0032010-T01-IM6	Colorectal Cancer	Signet Ring Cell Adenocarcinoma of the Colon and Rectum	SMAD4	R361H	OncoKB: Likely Oncogenic, level NA, resistance NA;CIViC: NA;MyCancerGenome: present;CancerHotspot: yes;3DHotspot: yes			MutationAssessor: impact: medium, score: 3.025;SIFT: impact: deleterious, score: 0.03;Polyphen-2: impact: probably_damaging, score: 0.999	Missense_Mutation	SNP	Diploid	67	SOMATIC	Unknown	MSKCC	18	48591919	48591919	G	A	18:g.48591919G>A	ENST00000342988.3:c.1082G>A	0.13		60	415		494	7	45547		Pathogenic			46	EO	Over_35			6.1			0.0155	IMPACT468
Colorectal Cancer (MSK, JNCI 2021)	P-0035104-T01-IM6	Colorectal Cancer	Colorectal Adenocarcinoma	SMAD4	R361H	OncoKB: Likely Oncogenic, level NA, resistance NA;CIViC: NA;MyCancerGenome: present;CancerHotspot: yes;3DHotspot: yes			MutationAssessor: impact: medium, score: 3.025;SIFT: impact: deleterious, score: 0.03;Polyphen-2: impact: probably_damaging, score: 0.999	Missense_Mutation	SNP	Diploid	67	SOMATIC	Unknown	MSKCC	18	48591919	48591919	G	A	18:g.48591919G>A	ENST00000342988.3:c.1082G>A	0.05	0.0028	29	586	1	361	15	45547		Pathogenic			37	EO	Over_35	21.7	NW	13.2		WEIGHT LOSS; CHANGE BOWEL HABITS	0.0015	IMPACT468		1		MSS
Colorectal Cancer (MSK, JNCI 2021)	P-0036503-T01-IM6	Colorectal Cancer	Colon Adenocarcinoma	SMAD4	R361H	OncoKB: Likely Oncogenic, level NA, resistance NA;CIViC: NA;MyCancerGenome: present;CancerHotspot: yes;3DHotspot: yes			MutationAssessor: impact: medium, score: 3.025;SIFT: impact: deleterious, score: 0.03;Polyphen-2: impact: probably_damaging, score: 0.999	Missense_Mutation	SNP	Diploid	67	SOMATIC	Unknown	MSKCC	18	48591919	48591919	G	A	18:g.48591919G>A	ENST00000342988.3:c.1082G>A	0.13		46	306		367	141	45547		Pathogenic			30	EO	Under_35	24.9	NW	123.8	0	BRBPR	0	IMPACT468	0			POLE
Colorectal Cancer (MSK, JNCI 2021)	P-0039557-T01-IM6	Colorectal Cancer	Colon Adenocarcinoma	SMAD4	R361H	OncoKB: Likely Oncogenic, level NA, resistance NA;CIViC: NA;MyCancerGenome: present;CancerHotspot: yes;3DHotspot: yes			MutationAssessor: impact: medium, score: 3.025;SIFT: impact: deleterious, score: 0.03;Polyphen-2: impact: probably_damaging, score: 0.999	Missense_Mutation	SNP	Diploid	67	SOMATIC	Unknown	MSKCC	18	48591919	48591919	G	A	18:g.48591919G>A	ENST00000342988.3:c.1082G>A	0.19		87	365		343	5	45547		Pathogenic			33	EO	Under_35	31.5	OB	4.4	0	CHANGE IN BOWEL HABITS	0.0174	IMPACT468	0	0		MSS
Colorectal Cancer (MSK, JNCI 2021)	P-0007405-T01-IM5	Colorectal Cancer	Colon Adenocarcinoma	SMAD4	D351Y	OncoKB: Likely Oncogenic, level NA, resistance NA;CIViC: NA;MyCancerGenome: present;CancerHotspot: yes;3DHotspot: yes			MutationAssessor: impact: high, score: 4.01;SIFT: impact: deleterious, score: 0;Polyphen-2: impact: probably_damaging, score: 1	Missense_Mutation	SNP	Diploid	22	SOMATIC	Unknown	MSKCC	18	48591888	48591888	G	T	18:g.48591888G>T	ENST00000342988.3:c.1051G>T	0.39		258	403		472	7	45547					53	AO	AO	31	OB	6.9	0	Abdominal pain; bloating; anemia	0.3512	IMPACT410	1	0		MSS
Colorectal Cancer (MSK, JNCI 2021)	P-0021771-T01-IM6	Colorectal Cancer	Colorectal Adenocarcinoma	SMAD4	D351Y	OncoKB: Likely Oncogenic, level NA, resistance NA;CIViC: NA;MyCancerGenome: present;CancerHotspot: yes;3DHotspot: yes			MutationAssessor: impact: high, score: 4.01;SIFT: impact: deleterious, score: 0;Polyphen-2: impact: probably_damaging, score: 1	Missense_Mutation	SNP	Diploid	22	SOMATIC	Unknown	MSKCC	18	48591888	48591888	G	T	18:g.48591888G>T	ENST00000342988.3:c.1051G>T	0.26	0.0013	151	424	1	794	10	45547					20	EO	Under_35	21.2	NW	8.8		ABDOMINAL PAIN, BLOATING/ABDOMINAL GIRTH/PELVIC PRESSURE,PAIN	0.1411	IMPACT468		0		MSS
Colorectal Cancer (MSK, JNCI 2021)	P-0010352-T01-IM5	Colorectal Cancer	Colon Adenocarcinoma	SMAD4	D537_E538dup	OncoKB: Likely Oncogenic, level NA, resistance NA;CIViC: NA;MyCancerGenome: present;CancerHotspot: yes;3DHotspot: no			MutationAssessor: NA;SIFT: NA;Polyphen-2: NA	In_Frame_Ins	INS	Diploid		SOMATIC	Unknown	MSKCC	18	48604785	48604786	-	AGACGA	18:g.48604785_48604786insAGACGA	ENST00000342988.3:c.1610_1615dup	0.27		152	413		328	7	45638					53	AO	AO	22.5	NW	6.9	0	Unknown	0.1752	IMPACT410	0	0		MSS
Colorectal Cancer (MSK, JNCI 2021)	P-0007592-T01-IM5	Colorectal Cancer	Colon Adenocarcinoma	SMAD4	D537G	OncoKB: Likely Oncogenic, level NA, resistance NA;CIViC: NA;MyCancerGenome: present;CancerHotspot: yes;3DHotspot: no			MutationAssessor: impact: medium, score: 3.495;SIFT: impact: deleterious, score: 0;Polyphen-2: impact: probably_damaging, score: 0.999	Missense_Mutation	SNP	Diploid	14	SOMATIC	Unknown	MSKCC	18	48604788	48604788	A	G	18:g.48604788A>G	ENST00000342988.3:c.1610A>G	0.37		198	343		350	9	45638		Uncertain_significance			51	AO	AO	25.2	OW	8.9	0	abdominal pain; fatigue; abnormal imaging	0.182	IMPACT410	0	1		MSS
Colorectal Cancer (MSK, JNCI 2021)	P-0008022-T02-IM5	Colorectal Cancer	Colon Adenocarcinoma	SMAD4	D537G	OncoKB: Likely Oncogenic, level NA, resistance NA;CIViC: NA;MyCancerGenome: present;CancerHotspot: yes;3DHotspot: no			MutationAssessor: impact: medium, score: 3.495;SIFT: impact: deleterious, score: 0;Polyphen-2: impact: probably_damaging, score: 0.999	Missense_Mutation	SNP	Diploid	14	SOMATIC	Unknown	MSKCC	18	48604788	48604788	A	G	18:g.48604788A>G	ENST00000342988.3:c.1610A>G	0.48		289	318		334	7	45638		Uncertain_significance			50	AO	AO	26	OW	6.9	0	Screening colonoscopy	0.2152	IMPACT410	0	0		MSS
Colorectal Cancer (MSK, JNCI 2021)	P-0010509-T01-IM5	Colorectal Cancer	Colon Adenocarcinoma	SMAD4	D537G	OncoKB: Likely Oncogenic, level NA, resistance NA;CIViC: NA;MyCancerGenome: present;CancerHotspot: yes;3DHotspot: no			MutationAssessor: impact: medium, score: 3.495;SIFT: impact: deleterious, score: 0;Polyphen-2: impact: probably_damaging, score: 0.999	Missense_Mutation	SNP	Diploid	14	SOMATIC	Unknown	MSKCC	18	48604788	48604788	A	G	18:g.48604788A>G	ENST00000342988.3:c.1610A>G	0.08		43	488		322	8	45638		Uncertain_significance			58	AO	AO	26.1	OW	7.9	0	abdominal cramping, rectal pressure	0.3073	IMPACT410	0	1		MSS
Colorectal Cancer (MSK, JNCI 2021)	P-0011287-T01-IM5	Colorectal Cancer	Colon Adenocarcinoma	SMAD4	D537G	OncoKB: Likely Oncogenic, level NA, resistance NA;CIViC: NA;MyCancerGenome: present;CancerHotspot: yes;3DHotspot: no			MutationAssessor: impact: medium, score: 3.495;SIFT: impact: deleterious, score: 0;Polyphen-2: impact: probably_damaging, score: 0.999	Missense_Mutation	SNP	Diploid	14	SOMATIC	Unknown	MSKCC	18	48604788	48604788	A	G	18:g.48604788A>G	ENST00000342988.3:c.1610A>G	0.2		154	615		430	7	45638		Uncertain_significance			44	EO	Over_35	26.8	OW	6.9	0	BRBPR	0.1234	IMPACT410	0	1		MSS
Colorectal Cancer (MSK, JNCI 2021)	P-0015783-T01-IM6	Colorectal Cancer	Colon Adenocarcinoma	SMAD4	D537G	OncoKB: Likely Oncogenic, level NA, resistance NA;CIViC: NA;MyCancerGenome: present;CancerHotspot: yes;3DHotspot: no			MutationAssessor: impact: medium, score: 3.495;SIFT: impact: deleterious, score: 0;Polyphen-2: impact: probably_damaging, score: 0.999	Missense_Mutation	SNP	Diploid	14	SOMATIC	Unknown	MSKCC	18	48604788	48604788	A	G	18:g.48604788A>G	ENST00000342988.3:c.1610A>G	0.11		80	671		538	5	45638		Uncertain_significance			48	EO	Over_35	35.3	OB	4.4	0	ABDOMINAL PAIN, BLOATING/ABDOMINAL GIRTH/PELVIC PRESSURE,PAIN	0.193	IMPACT468	0	1		MSS
Colorectal Cancer (MSK, JNCI 2021)	P-0038168-T01-IM6	Colorectal Cancer	Colorectal Adenocarcinoma	SMAD4	D537G	OncoKB: Likely Oncogenic, level NA, resistance NA;CIViC: NA;MyCancerGenome: present;CancerHotspot: yes;3DHotspot: no			MutationAssessor: impact: medium, score: 3.495;SIFT: impact: deleterious, score: 0;Polyphen-2: impact: probably_damaging, score: 0.999	Missense_Mutation	SNP	Diploid	14	SOMATIC	Unknown	MSKCC	18	48604788	48604788	A	G	18:g.48604788A>G	ENST00000342988.3:c.1610A>G	0.1		28	242		363	10	45638		Uncertain_significance			38	EO	Over_35	26.1	OW	8.8	0	BRBPR	0.2156	IMPACT468	0			MSS
Colorectal Cancer (MSK, JNCI 2021)	P-0038184-T01-IM6	Colorectal Cancer	Colorectal Adenocarcinoma	SMAD4	D537G	OncoKB: Likely Oncogenic, level NA, resistance NA;CIViC: NA;MyCancerGenome: present;CancerHotspot: yes;3DHotspot: no			MutationAssessor: impact: medium, score: 3.495;SIFT: impact: deleterious, score: 0;Polyphen-2: impact: probably_damaging, score: 0.999	Missense_Mutation	SNP	Diploid	14	SOMATIC	Unknown	MSKCC	18	48604788	48604788	A	G	18:g.48604788A>G	ENST00000342988.3:c.1610A>G	0.07		39	495		570	6	45638		Uncertain_significance			36	EO	Over_35	21.8	NW	5.3	0	ABDOMINAL PAIN, BLOATING/ABDOMINAL GIRTH/PELVIC PRESSURE,PAIN; BRBPR; WEIGHT LOSS	0.1268	IMPACT468	0	0		MSS
Colorectal Cancer (MSK, JNCI 2021)	P-0001287-T01-IM3	Colorectal Cancer	Rectal Adenocarcinoma	SMAD4	D537E	OncoKB: Likely Oncogenic, level NA, resistance NA;CIViC: NA;MyCancerGenome: present;CancerHotspot: yes;3DHotspot: no			MutationAssessor: impact: high, score: 3.7;SIFT: impact: deleterious, score: 0;Polyphen-2: impact: probably_damaging, score: 0.991	Missense_Mutation	SNP	Diploid	14	SOMATIC	Unknown	MSKCC	18	48604789	48604789	C	G	18:g.48604789C>G	ENST00000342988.3:c.1611C>G	0.3		201	469		318	7	45638					65	AO	AO	35.2	OB	7.8	0	BRBPR; Anemia	0.155	IMPACT341	0	0		MSS
Colorectal Cancer (MSK, JNCI 2021)	P-0038014-T01-IM6	Colorectal Cancer	Rectal Adenocarcinoma	SMAD4	D537A	OncoKB: Likely Oncogenic, level NA, resistance NA;CIViC: NA;MyCancerGenome: present;CancerHotspot: yes;3DHotspot: no			MutationAssessor: impact: high, score: 4.045;SIFT: impact: deleterious, score: 0;Polyphen-2: impact: probably_damaging, score: 0.998	Missense_Mutation	SNP	Diploid	14	SOMATIC	Unknown	MSKCC	18	48604788	48604788	A	C	18:g.48604788A>C	ENST00000342988.3:c.1610A>C	0.26		94	274		283	11	45638					39	EO	Over_35	27.7	OW	9.7	0	BRBPR	0.2082	IMPACT468	0			MSS
Colorectal Cancer (MSK, JNCI 2021)	P-0003124-T01-IM5	Colorectal Cancer	Colon Adenocarcinoma	SMAD4	D537Kfs*14	OncoKB: Likely Oncogenic, level NA, resistance NA;CIViC: NA;MyCancerGenome: present;CancerHotspot: no;3DHotspot: no			MutationAssessor: NA;SIFT: NA;Polyphen-2: NA	Frame_Shift_Del	DEL	Diploid		UNKNOWN	NA	MSKCC	18	48604786	48604789	AGAC	-	18:g.48604786_48604789del	ENST00000342988.3:c.1608_1611del	0.43		159	209		768	12	45638					54	AO	AO	38.4	OB	11.8	0	abdominal pain, constipation	0.2923	IMPACT410	0	0		MSS
Colorectal Cancer (MSK, JNCI 2021)	P-0000997-T01-IM3	Colorectal Cancer	Colon Adenocarcinoma	SMAD4	A118V	OncoKB: Likely Oncogenic, level NA, resistance NA;CIViC: NA;MyCancerGenome: not present;CancerHotspot: yes;3DHotspot: yes			MutationAssessor: impact: medium, score: 2.995;SIFT: impact: deleterious, score: 0.04;Polyphen-2: impact: probably_damaging, score: 0.998	Missense_Mutation	SNP	Diploid	8	SOMATIC	Unknown	MSKCC	18	48575159	48575159	C	T	18:g.48575159C>T	ENST00000342988.3:c.353C>T	0.57		325	247		227	16	45363		Uncertain_significance			78	AO	AO	27.7	OW	17.8	0	brbpr	0.5111	IMPACT341	1	0		MSS
Colorectal Cancer (MSK, JNCI 2021)	P-0006581-T01-IM5	Colorectal Cancer	Colon Adenocarcinoma	SMAD4	A118V	OncoKB: Likely Oncogenic, level NA, resistance NA;CIViC: NA;MyCancerGenome: not present;CancerHotspot: yes;3DHotspot: yes			MutationAssessor: impact: medium, score: 2.995;SIFT: impact: deleterious, score: 0.04;Polyphen-2: impact: probably_damaging, score: 0.998	Missense_Mutation	SNP	Diploid	8	SOMATIC	Unknown	MSKCC	18	48575159	48575159	C	T	18:g.48575159C>T	ENST00000342988.3:c.353C>T	0.08		50	604		397	10	45363		Uncertain_significance			78	AO	AO	29	OW	9.8	0	incidentally found on colonoscopy	0.1118	IMPACT410	1	1		MSS
Colorectal Cancer (MSK, JNCI 2021)	P-0007602-T01-IM5	Colorectal Cancer	Colon Adenocarcinoma	SMAD4	A118V	OncoKB: Likely Oncogenic, level NA, resistance NA;CIViC: NA;MyCancerGenome: not present;CancerHotspot: yes;3DHotspot: yes			MutationAssessor: impact: medium, score: 2.995;SIFT: impact: deleterious, score: 0.04;Polyphen-2: impact: probably_damaging, score: 0.998	Missense_Mutation	SNP	Diploid	8	SOMATIC	Unknown	MSKCC	18	48575159	48575159	C	T	18:g.48575159C>T	ENST00000342988.3:c.353C>T	0.04	0.004	59	1330	2	504	9	45363		Uncertain_significance			65	AO	AO	26.3	OW	8.9	0	Weight loss; bloating; change in bowel habits; BRBPR; rectal pain; fatigue	0.0215	IMPACT410	0	0		MSS
Colorectal Cancer (MSK, JNCI 2021)	P-0027322-T01-IM6	Colorectal Cancer	Rectal Adenocarcinoma	SMAD4	A118V	OncoKB: Likely Oncogenic, level NA, resistance NA;CIViC: NA;MyCancerGenome: not present;CancerHotspot: yes;3DHotspot: yes			MutationAssessor: impact: medium, score: 2.995;SIFT: impact: deleterious, score: 0.04;Polyphen-2: impact: probably_damaging, score: 0.998	Missense_Mutation	SNP	Diploid	8	SOMATIC	Unknown	MSKCC	18	48575159	48575159	C	T	18:g.48575159C>T	ENST00000342988.3:c.353C>T	0.41		164	236		367	6	45363		Uncertain_significance			26	EO	Under_35	23.3	NW	5.3	0	FATIGUE; CHANGE IN BOWEL HABITS	0.3561	IMPACT468	0			MSS
Colorectal Cancer (MSK, JNCI 2021)	P-0031527-T01-IM6	Colorectal Cancer	Colorectal Adenocarcinoma	SMAD4	A118V	OncoKB: Likely Oncogenic, level NA, resistance NA;CIViC: NA;MyCancerGenome: not present;CancerHotspot: yes;3DHotspot: yes			MutationAssessor: impact: medium, score: 2.995;SIFT: impact: deleterious, score: 0.04;Polyphen-2: impact: probably_damaging, score: 0.998	Missense_Mutation	SNP	Diploid	8	SOMATIC	Unknown	MSKCC	18	48575159	48575159	C	T	18:g.48575159C>T	ENST00000342988.3:c.353C>T	0.1		36	310		328	6	45363		Uncertain_significance			47	EO	Over_35	25.9	OW	5.3	0	BRBPR	0.0474	IMPACT468	1			MSS
Colorectal Cancer (MSK, JNCI 2021)	P-0033852-T01-IM6	Colorectal Cancer	Colon Adenocarcinoma	SMAD4	A118V	OncoKB: Likely Oncogenic, level NA, resistance NA;CIViC: NA;MyCancerGenome: not present;CancerHotspot: yes;3DHotspot: yes			MutationAssessor: impact: medium, score: 2.995;SIFT: impact: deleterious, score: 0.04;Polyphen-2: impact: probably_damaging, score: 0.998	Missense_Mutation	SNP	Diploid	8	SOMATIC	Unknown	MSKCC	18	48575159	48575159	C	T	18:g.48575159C>T	ENST00000342988.3:c.353C>T	0.08	0.0034	15	183	1	290	44	45363		Uncertain_significance			39	EO	Over_35			38.6			0.1613	IMPACT468
Colorectal Cancer (MSK, JNCI 2021)	P-0034167-T01-IM6	Colorectal Cancer	Colon Adenocarcinoma	SMAD4	A118V	OncoKB: Likely Oncogenic, level NA, resistance NA;CIViC: NA;MyCancerGenome: not present;CancerHotspot: yes;3DHotspot: yes			MutationAssessor: impact: medium, score: 2.995;SIFT: impact: deleterious, score: 0.04;Polyphen-2: impact: probably_damaging, score: 0.998	Missense_Mutation	SNP	Diploid	8	SOMATIC	Unknown	MSKCC	18	48575159	48575159	C	T	18:g.48575159C>T	ENST00000342988.3:c.353C>T	0.07		28	355		479	7	45363		Uncertain_significance			34	EO	Under_35	19.4	NW	6.1	0	BRBPR; ABDOMINAL PAIN, BLOATING/ABDOMINAL GIRTH/PELVIC PRESSURE,PAIN	0.059	IMPACT468	0	1		MSS
Colorectal Cancer (MSK, JNCI 2021)	P-0020232-T01-IM6	Colorectal Cancer	Colon Adenocarcinoma	SMAD4	C363Y	OncoKB: Likely Oncogenic, level NA, resistance NA;CIViC: NA;MyCancerGenome: not present;CancerHotspot: yes;3DHotspot: yes			MutationAssessor: impact: high, score: 4.06;SIFT: impact: deleterious, score: 0;Polyphen-2: impact: probably_damaging, score: 1	Missense_Mutation	SNP	Diploid	6	SOMATIC	Unknown	MSKCC	18	48591925	48591925	G	A	18:g.48591925G>A	ENST00000342988.3:c.1088G>A	0.08	0.0014	28	316	1	728	8	45547		Likely_pathogenic			38	EO	Over_35	23.8	NW	7	0	BRBPR	0.0716	IMPACT468	0	1		MSS
Colorectal Cancer (MSK, JNCI 2021)	P-0002475-T01-IM3	Colorectal Cancer	Colon Adenocarcinoma	SMAD4	G386R	OncoKB: Likely Oncogenic, level NA, resistance NA;CIViC: NA;MyCancerGenome: not present;CancerHotspot: yes;3DHotspot: yes			MutationAssessor: impact: high, score: 3.82;SIFT: impact: deleterious, score: 0;Polyphen-2: impact: probably_damaging, score: 1	Missense_Mutation	SNP	Diploid	22	SOMATIC	Unknown	MSKCC	18	48593405	48593405	G	C	18:g.48593405G>C	ENST00000342988.3:c.1156G>C	0.03		14	436		291	9	45577					68	AO	AO	32.5	OB	10	0	Abdominal pain; BRBPR	0.313	IMPACT341	1	0		MSS
Colorectal Cancer (MSK, JNCI 2021)	P-0008662-T01-IM5	Colorectal Cancer	Rectal Adenocarcinoma	SMAD4	G386S	OncoKB: Likely Oncogenic, level NA, resistance NA;CIViC: NA;MyCancerGenome: not present;CancerHotspot: yes;3DHotspot: yes			MutationAssessor: impact: high, score: 4.165;SIFT: impact: deleterious, score: 0.04;Polyphen-2: impact: probably_damaging, score: 1	Missense_Mutation	SNP	Diploid	22	SOMATIC	Unknown	MSKCC	18	48593405	48593405	G	A	18:g.48593405G>A	ENST00000342988.3:c.1156G>A	0.02		11	441		346	2	45577		Likely_pathogenic			67	AO	AO	21.2	NW	2	0	incidentally found on colonoscopy	0	IMPACT410	1			MSS
Colorectal Cancer (MSK, JNCI 2021)	P-0011264-T01-IM5	Colorectal Cancer	Colon Adenocarcinoma	SMAD4	C363F	OncoKB: Likely Oncogenic, level NA, resistance NA;CIViC: NA;MyCancerGenome: not present;CancerHotspot: yes;3DHotspot: yes			MutationAssessor: impact: high, score: 4.06;SIFT: impact: deleterious, score: 0;Polyphen-2: impact: probably_damaging, score: 1	Missense_Mutation	SNP	Diploid	6	SOMATIC	Unknown	MSKCC	18	48591925	48591925	G	T	18:g.48591925G>T	ENST00000342988.3:c.1088G>T	0.31		233	510		436	10	45547					61	AO	AO	18.1	UW	9.8	0	anemia	0.1289	IMPACT410	0	0		MSS
Colorectal Cancer (MSK, JNCI 2021)	P-0030231-T01-IM6	Colorectal Cancer	Colon Adenocarcinoma	SMAD4	G386A	OncoKB: Likely Oncogenic, level NA, resistance NA;CIViC: NA;MyCancerGenome: not present;CancerHotspot: yes;3DHotspot: yes			MutationAssessor: impact: high, score: 3.82;SIFT: impact: deleterious, score: 0;Polyphen-2: impact: probably_damaging, score: 0.999	Missense_Mutation	SNP	Diploid	22	SOMATIC	Unknown	MSKCC	18	48593406	48593406	G	C	18:g.48593406G>C	ENST00000342988.3:c.1157G>C	0.1		37	348		298	11	45577		Likely_pathogenic			38	EO	Over_35	33.6	OB	9.7		BRBPR	0.2067	IMPACT468		1		MSS
Colorectal Cancer (MSK, JNCI 2021)	P-0005200-T01-IM5	Colorectal Cancer	Colon Adenocarcinoma	SMAD4	G510R	OncoKB: Likely Oncogenic, level NA, resistance NA;CIViC: NA;MyCancerGenome: not present;CancerHotspot: yes;3DHotspot: no			MutationAssessor: impact: high, score: 4.16;SIFT: impact: deleterious, score: 0;Polyphen-2: impact: probably_damaging, score: 0.989	Missense_Mutation	SNP	Diploid	4	SOMATIC	Unknown	MSKCC	18	48604706	48604706	G	A	18:g.48604706G>A	ENST00000342988.3:c.1528G>A	0.4		142	211		210	7	45638					71	AO	AO	28.3	OW	6.9	0	fatigue, dyspnea	0.1012	IMPACT410	1			MSS
Colorectal Cancer (MSK, JNCI 2021)	P-0012912-T01-IM5	Colorectal Cancer	Colon Adenocarcinoma	SMAD4	W524C	OncoKB: Likely Oncogenic, level NA, resistance NA;CIViC: NA;MyCancerGenome: not present;CancerHotspot: yes;3DHotspot: no			MutationAssessor: impact: high, score: 4.16;SIFT: impact: deleterious, score: 0.04;Polyphen-2: impact: probably_damaging, score: 0.917	Missense_Mutation	SNP	Diploid	5	SOMATIC	Unknown	MSKCC	18	48604750	48604750	G	T	18:g.48604750G>T	ENST00000342988.3:c.1572G>T	0.1		105	944		546	9	45638		Likely_pathogenic			63	AO	AO	25.2	OW	8.9	0	weight loss, constipation	0.0005	IMPACT410	0	0		MSS
Colorectal Cancer (MSK, JNCI 2021)	P-0002563-T01-IM3	Colorectal Cancer	Rectal Adenocarcinoma	SMAD4	P356L	OncoKB: Likely Oncogenic, level NA, resistance NA;CIViC: NA;MyCancerGenome: not present;CancerHotspot: yes;3DHotspot: no			MutationAssessor: impact: medium, score: 2.245;SIFT: impact: deleterious, score: 0;Polyphen-2: impact: probably_damaging, score: 1	Missense_Mutation	SNP	Diploid	12	UNKNOWN	NA	MSKCC	18	48591904	48591904	C	T	18:g.48591904C>T	ENST00000342988.3:c.1067C>T	0.17		67	339		1225	6	45547		Uncertain_significance			68	AO	AO	21.9	NW	6.7	0	self rectal exam	0.2115	IMPACT341	1	0		MSS
Colorectal Cancer (MSK, JNCI 2021)	P-0006181-T01-IM5	Colorectal Cancer	Rectal Adenocarcinoma	SMAD4	P356L	OncoKB: Likely Oncogenic, level NA, resistance NA;CIViC: NA;MyCancerGenome: not present;CancerHotspot: yes;3DHotspot: no			MutationAssessor: impact: medium, score: 2.245;SIFT: impact: deleterious, score: 0;Polyphen-2: impact: probably_damaging, score: 1	Missense_Mutation	SNP	Diploid	12	SOMATIC	Unknown	MSKCC	18	48591904	48591904	C	T	18:g.48591904C>T	ENST00000342988.3:c.1067C>T	0.56	0.0021	375	300	1	482	8	45547		Uncertain_significance			61	AO	AO	37.4	OB	7.9	0	Change in bowel habits; BRBPR	0.163	IMPACT410	0	0		MSS
Colorectal Cancer (MSK, JNCI 2021)	P-0006469-T01-IM5	Colorectal Cancer	Mucinous Adenocarcinoma of the Colon and Rectum	SMAD4	P356L	OncoKB: Likely Oncogenic, level NA, resistance NA;CIViC: NA;MyCancerGenome: not present;CancerHotspot: yes;3DHotspot: no			MutationAssessor: impact: medium, score: 2.245;SIFT: impact: deleterious, score: 0;Polyphen-2: impact: probably_damaging, score: 1	Missense_Mutation	SNP	Diploid	12	SOMATIC	Unknown	MSKCC	18	48591904	48591904	C	T	18:g.48591904C>T	ENST00000342988.3:c.1067C>T	0.41	0.0019	203	292	1	528	7	45547		Uncertain_significance			65	AO	AO	31.7	OB	6.9	1	Change in bowel habits	0.1822	IMPACT410	1	0		MSS
Colorectal Cancer (MSK, JNCI 2021)	P-0004716-T02-IM5	Colorectal Cancer	Colon Adenocarcinoma	SMAD4	G419R	OncoKB: Likely Oncogenic, level NA, resistance NA;CIViC: NA;MyCancerGenome: not present;CancerHotspot: yes;3DHotspot: no			MutationAssessor: impact: high, score: 3.81;SIFT: impact: deleterious, score: 0;Polyphen-2: impact: possibly_damaging, score: 0.811	Missense_Mutation	SNP	Diploid	4	SOMATIC	Unknown	MSKCC	18	48593504	48593504	G	A	18:g.48593504G>A	ENST00000342988.3:c.1255G>A	0.54		174	146		310	11	45577					67	AO	AO	21.4	NW	10.8	0	Fatigue; BRBPR; change in bowel habits	0.2192	IMPACT410	0	1		MSS
Colorectal Cancer (MSK, JNCI 2021)	P-0037898-T01-IM6	Colorectal Cancer	Colon Adenocarcinoma	SMAD4	G510E	OncoKB: Likely Oncogenic, level NA, resistance NA;CIViC: NA;MyCancerGenome: not present;CancerHotspot: yes;3DHotspot: no			MutationAssessor: impact: high, score: 4.16;SIFT: impact: deleterious, score: 0;Polyphen-2: impact: probably_damaging, score: 0.983	Missense_Mutation	SNP	Diploid	4	SOMATIC	Unknown	MSKCC	18	48604707	48604707	G	A	18:g.48604707G>A	ENST00000342988.3:c.1529G>A	0.06		15	240		301	216	45638		Uncertain_significance			29	EO	Under_35	20.1	NW	189.6	0	CHANGE IN BOWEL HABITS; WEIGHT LOSS	0.0126	IMPACT468	0			POLE
Colorectal Cancer (MSK, JNCI 2021)	P-0002475-T01-IM3	Colorectal Cancer	Colon Adenocarcinoma	SMAD4	P356H	OncoKB: Likely Oncogenic, level NA, resistance NA;CIViC: NA;MyCancerGenome: not present;CancerHotspot: yes;3DHotspot: no			MutationAssessor: impact: high, score: 3.925;SIFT: impact: deleterious, score: 0;Polyphen-2: impact: probably_damaging, score: 1	Missense_Mutation	SNP	Diploid	12	SOMATIC	Unknown	MSKCC	18	48591904	48591904	C	A	18:g.48591904C>A	ENST00000342988.3:c.1067C>A	0.44		252	327		425	9	45547					68	AO	AO	32.5	OB	10	0	Abdominal pain; BRBPR	0.313	IMPACT341	1	0		MSS
Colorectal Cancer (MSK, JNCI 2021)	P-0023616-T01-IM6	Colorectal Cancer	Rectal Adenocarcinoma	SMAD4	E374_A379del	OncoKB: Likely Oncogenic, level NA, resistance NA;CIViC: NA;MyCancerGenome: not present;CancerHotspot: yes;3DHotspot: no			MutationAssessor: NA;SIFT: NA;Polyphen-2: NA	In_Frame_Del	DEL	Diploid		SOMATIC	Unknown	MSKCC	18	48591955	48591972	CAGAAGCCATTGAGAGAG	-	18:g.48591955_48591972del	ENST00000342988.3:c.1120_1137del	0.08	0.0038	23	253	2	529	7	45547					46	EO	Over_35	37.3	OB	6.1	0	ABDOMINAL PAIN, BLOATING/ABDOMINAL GIRTH/PELVIC PRESSURE,PAIN	0.1621	IMPACT468	0	1		MSS
Colorectal Cancer (MSK, JNCI 2021)	P-0033852-T01-IM6	Colorectal Cancer	Colon Adenocarcinoma	SMAD4	L536I	OncoKB: Likely Oncogenic, level NA, resistance NA;CIViC: NA;MyCancerGenome: not present;CancerHotspot: yes;3DHotspot: no			MutationAssessor: impact: medium, score: 2.885;SIFT: impact: deleterious, score: 0;Polyphen-2: impact: probably_damaging, score: 0.994	Missense_Mutation	SNP	Diploid	2	SOMATIC	Unknown	MSKCC	18	48604784	48604784	C	A	18:g.48604784C>A	ENST00000342988.3:c.1606C>A	0.3		48	112		322	44	45638					39	EO	Over_35			38.6			0.1613	IMPACT468
Colorectal Cancer (MSK, JNCI 2021)	P-0036503-T01-IM6	Colorectal Cancer	Colon Adenocarcinoma	SMAD4	E526A	OncoKB: Likely Oncogenic, level NA, resistance NA;CIViC: NA;MyCancerGenome: not present;CancerHotspot: yes;3DHotspot: no			MutationAssessor: impact: high, score: 4.145;SIFT: impact: deleterious, score: 0;Polyphen-2: impact: probably_damaging, score: 0.92	Missense_Mutation	SNP	Diploid	5	SOMATIC	Unknown	MSKCC	18	48604755	48604755	A	C	18:g.48604755A>C	ENST00000342988.3:c.1577A>C	0.26		91	257		301	141	45638					30	EO	Under_35	24.9	NW	123.8	0	BRBPR	0	IMPACT468	0			POLE
Colorectal Cancer (MSK, JNCI 2021)	P-0020642-T01-IM6	Colorectal Cancer	Colon Adenocarcinoma	SMAD4	R135*	OncoKB: Likely Oncogenic, level NA, resistance NA;CIViC: NA;MyCancerGenome: not present;CancerHotspot: no;3DHotspot: no			MutationAssessor: NA;SIFT: NA;Polyphen-2: NA	Nonsense_Mutation	SNP	Diploid	10	SOMATIC	Unknown	MSKCC	18	48575209	48575209	C	T	18:g.48575209C>T	ENST00000342988.3:c.403C>T	0.25		115	337		306	6	45363		Pathogenic			43	EO	Over_35	22.9	NW	5.3	0	ABDOMINAL PAIN, BLOATING/ABDOMINAL GIRTH/PELVIC PRESSURE,PAIN	0.1896	IMPACT468	0	1		MSS
Colorectal Cancer (MSK, JNCI 2021)	P-0017808-T01-IM6	Colorectal Cancer	Colorectal Adenocarcinoma	SMAD4	E538*	OncoKB: Likely Oncogenic, level NA, resistance NA;CIViC: NA;MyCancerGenome: not present;CancerHotspot: no;3DHotspot: no			MutationAssessor: NA;SIFT: NA;Polyphen-2: NA	Nonsense_Mutation	SNP	Diploid	4	SOMATIC	Unknown	MSKCC	18	48604790	48604790	G	T	18:g.48604790G>T	ENST00000342988.3:c.1612G>T	0.32		196	411		494	5	45638		Likely_pathogenic			46	EO	Over_35	24.7	NW	4.4	0	ABDOMINAL PAIN, BLOATING/ABDOMINAL GIRTH/PELVIC PRESSURE,PAIN	0.3672	IMPACT468	1	0		MSS
Colorectal Cancer (MSK, JNCI 2021)	P-0017983-T01-IM6	Colorectal Cancer	Colon Adenocarcinoma	SMAD4	E538*	OncoKB: Likely Oncogenic, level NA, resistance NA;CIViC: NA;MyCancerGenome: not present;CancerHotspot: no;3DHotspot: no			MutationAssessor: NA;SIFT: NA;Polyphen-2: NA	Nonsense_Mutation	SNP	Diploid	4	SOMATIC	Unknown	MSKCC	18	48604790	48604790	G	T	18:g.48604790G>T	ENST00000342988.3:c.1612G>T	0.24	0.0018	117	363	1	566	8	45638		Likely_pathogenic			39	EO	Over_35	21.5	NW	7	1	OTHER	0.1517	IMPACT468	1	1		MSS
Colorectal Cancer (MSK, JNCI 2021)	P-0007495-T01-IM5	Colorectal Cancer	Rectal Adenocarcinoma	SMAD4	X380_splice	OncoKB: Likely Oncogenic, level NA, resistance NA;CIViC: NA;MyCancerGenome: not present;CancerHotspot: no;3DHotspot: no			MutationAssessor: NA;SIFT: NA;Polyphen-2: NA	Splice_Site	SNP	Diploid		SOMATIC	Unknown	MSKCC	18	48591978	48591978	T	C	18:g.48591978T>C	ENST00000342988.3:c.1139+2T>C	0.23		83	277		249	14						78	AO	AO	25.1	OW	13.8	1	Fatigue; anemia	0	IMPACT410	1			MSS
Colorectal Cancer (MSK, JNCI 2021)	P-0007168-T01-IM5	Colorectal Cancer	Rectal Adenocarcinoma	SMAD4	D415Efs*20	OncoKB: Likely Oncogenic, level NA, resistance NA;CIViC: NA;MyCancerGenome: not present;CancerHotspot: no;3DHotspot: no			MutationAssessor: NA;SIFT: NA;Polyphen-2: NA	Frame_Shift_Del	DEL	Diploid	2	SOMATIC	Unknown	MSKCC	18	48593491	48593494	AGAC	-	18:g.48593491_48593494del	ENST00000342988.3:c.1245_1248del	0.44		301	380		328	8	45577		Pathogenic			67	AO	AO		OW	7.9	1	weight loss; change in bowel habits	0.2657	IMPACT410	1	1		MSS
Colorectal Cancer (MSK, JNCI 2021)	P-0035154-T01-IM6	Colorectal Cancer	Colorectal Adenocarcinoma	SMAD4	D415Efs*20	OncoKB: Likely Oncogenic, level NA, resistance NA;CIViC: NA;MyCancerGenome: not present;CancerHotspot: no;3DHotspot: no			MutationAssessor: NA;SIFT: NA;Polyphen-2: NA	Frame_Shift_Del	DEL	Diploid	2	SOMATIC	Unknown	MSKCC	18	48593491	48593494	AGAC	-	18:g.48593491_48593494del	ENST00000342988.3:c.1245_1248del	0.25		75	225		384	10	45577		Pathogenic			39	EO	Over_35	24.9	NW	9.7	1	ABDOMINAL PAIN, BLOATING/ABDOMINAL GIRTH/PELVIC PRESSURE,PAIN; WEIGHT LOSS; BRBPR	0.1904	IMPACT468	1			MSS
Colorectal Cancer (MSK, JNCI 2021)	P-0012415-T01-IM5	Colorectal Cancer	Colon Adenocarcinoma	SMAD4	V128Efs*14	OncoKB: Likely Oncogenic, level NA, resistance NA;CIViC: NA;MyCancerGenome: not present;CancerHotspot: no;3DHotspot: no			MutationAssessor: NA;SIFT: NA;Polyphen-2: NA	Frame_Shift_Del	DEL	Diploid		SOMATIC	Unknown	MSKCC	18	48575183	48575184	TC	-	18:g.48575183_48575184del	ENST00000342988.3:c.378_379del	0.57		289	219		362	11	45363					55	AO	AO	31	OB	10.8	0	rectal bleeding	0.2137	IMPACT410	0	1		MSS
Colorectal Cancer (MSK, JNCI 2021)	P-0040064-T01-IM6	Colorectal Cancer	Colon Adenocarcinoma	SMAD4	K428T	OncoKB: Likely Oncogenic, level NA, resistance NA;CIViC: NA;MyCancerGenome: not present;CancerHotspot: no;3DHotspot: no			MutationAssessor: impact: high, score: 3.74;SIFT: impact: deleterious, score: 0.01;Polyphen-2: impact: possibly_damaging, score: 0.83	Missense_Mutation	SNP	Diploid	6	SOMATIC	Unknown	MSKCC	18	48593532	48593532	A	C	18:g.48593532A>C	ENST00000342988.3:c.1283A>C	0.14		37	237		180	12	45577		Uncertain_significance			36	EO	Over_35	24.8	NW	10.5	0	OTHER	0.029	IMPACT468	0	0		MSS
Colorectal Cancer (MSK, JNCI 2021)	P-0007746-T01-IM5	Colorectal Cancer	Rectal Adenocarcinoma	SMAD4	S32*	OncoKB: Likely Oncogenic, level NA, resistance NA;CIViC: NA;MyCancerGenome: not present;CancerHotspot: no;3DHotspot: no			MutationAssessor: NA;SIFT: NA;Polyphen-2: NA	Frame_Shift_Del	DEL	Diploid	2	SOMATIC	Unknown	MSKCC	18	48573505	48573506	GA	-	18:g.48573505_48573506del	ENST00000342988.3:c.94_95del	0.05		55	1030		421	7	45334					65	AO	AO	28.3	OW	6.9	0	Abdominal bloating; abdominal pain	0	IMPACT410	0			MSS
Colorectal Cancer (MSK, JNCI 2021)	P-0011239-T02-IM5	Colorectal Cancer	Colon Adenocarcinoma	SMAD4	S32*	OncoKB: Likely Oncogenic, level NA, resistance NA;CIViC: NA;MyCancerGenome: not present;CancerHotspot: no;3DHotspot: no			MutationAssessor: NA;SIFT: NA;Polyphen-2: NA	Frame_Shift_Del	DEL	Diploid	2	SOMATIC	Unknown	MSKCC	18	48573505	48573506	GA	-	18:g.48573505_48573506del	ENST00000342988.3:c.94_95del	0.12		129	941		600	83	45334					81	AO	AO	26.4	OW	82.6	1	fecal occult blood	0.0613	IMPACT410	1			MSI
Colorectal Cancer (MSK, JNCI 2021)	P-0004865-T01-IM5	Colorectal Cancer	Colon Adenocarcinoma	SMAD4	E520*	OncoKB: Likely Oncogenic, level NA, resistance NA;CIViC: NA;MyCancerGenome: not present;CancerHotspot: no;3DHotspot: no			MutationAssessor: NA;SIFT: NA;Polyphen-2: NA	Nonsense_Mutation	SNP	Diploid	2	SOMATIC	Unknown	MSKCC	18	48604736	48604736	G	T	18:g.48604736G>T	ENST00000342988.3:c.1558G>T	0.28		253	637		598	147	45638					55	AO	AO	33	OB	143.6	0	Change in bowel habits; FOBT+	0	IMPACT410	0			POLE
Colorectal Cancer (MSK, JNCI 2021)	P-0006612-T01-IM5	Colorectal Cancer	Colon Adenocarcinoma	SMAD4	E520*	OncoKB: Likely Oncogenic, level NA, resistance NA;CIViC: NA;MyCancerGenome: not present;CancerHotspot: no;3DHotspot: no			MutationAssessor: NA;SIFT: NA;Polyphen-2: NA	Nonsense_Mutation	SNP	Diploid	2	SOMATIC	Unknown	MSKCC	18	48604736	48604736	G	T	18:g.48604736G>T	ENST00000342988.3:c.1558G>T	0.25		184	552		557	361	45638					70	AO	AO	29.7	OW	356.1	0	SCREENING COLONOSCOPY	0.0006	IMPACT410	1			POLE
Colorectal Cancer (MSK, JNCI 2021)	P-0023271-T01-IM6	Colorectal Cancer	Colon Adenocarcinoma	SMAD4	E520*	OncoKB: Likely Oncogenic, level NA, resistance NA;CIViC: NA;MyCancerGenome: not present;CancerHotspot: no;3DHotspot: no			MutationAssessor: NA;SIFT: NA;Polyphen-2: NA	Nonsense_Mutation	SNP	Diploid	2	SOMATIC	Unknown	MSKCC	18	48604736	48604736	G	T	18:g.48604736G>T	ENST00000342988.3:c.1558G>T	0.27		131	351		559	303	45638					39	EO	Over_35	23.7	NW	265.9	0	WEIGHT LOSS	0.0119	IMPACT468	0			POLE
Colorectal Cancer (MSK, JNCI 2021)	P-0036503-T01-IM6	Colorectal Cancer	Colon Adenocarcinoma	SMAD4	E520*	OncoKB: Likely Oncogenic, level NA, resistance NA;CIViC: NA;MyCancerGenome: not present;CancerHotspot: no;3DHotspot: no			MutationAssessor: NA;SIFT: NA;Polyphen-2: NA	Nonsense_Mutation	SNP	Diploid	2	SOMATIC	Unknown	MSKCC	18	48604736	48604736	G	T	18:g.48604736G>T	ENST00000342988.3:c.1558G>T	0.06		22	337		308	141	45638					30	EO	Under_35	24.9	NW	123.8	0	BRBPR	0	IMPACT468	0			POLE
Colorectal Cancer (MSK, JNCI 2021)	P-0006207-T01-IM5	Colorectal Cancer	Colon Adenocarcinoma	SMAD4	W302*	OncoKB: Likely Oncogenic, level NA, resistance NA;CIViC: NA;MyCancerGenome: not present;CancerHotspot: no;3DHotspot: no			MutationAssessor: NA;SIFT: NA;Polyphen-2: NA	Nonsense_Mutation	SNP	Diploid	2	SOMATIC	Unknown	MSKCC	18	48586237	48586237	G	A	18:g.48586237G>A	ENST00000342988.3:c.906G>A	0.2		90	362		235	60	45516		Pathogenic			78	AO	AO	30.5	OB	59	0	BRBPR; change in bowel habits	0	IMPACT410	1			MSI
Colorectal Cancer (MSK, JNCI 2021)	P-0017986-T02-IM6	Colorectal Cancer	Rectal Adenocarcinoma	SMAD4	R497H	OncoKB: Likely Oncogenic, level NA, resistance NA;CIViC: NA;MyCancerGenome: not present;CancerHotspot: no;3DHotspot: no			MutationAssessor: impact: medium, score: 2.275;SIFT: impact: deleterious, score: 0.03;Polyphen-2: impact: possibly_damaging, score: 0.674	Missense_Mutation	SNP	Diploid	2	SOMATIC	Unknown	MSKCC	18	48604668	48604668	G	A	18:g.48604668G>A	ENST00000342988.3:c.1490G>A	0.28		163	420		432	72	45638		Uncertain_significance			32	EO	Under_35			63.2			0.2032	IMPACT468
Colorectal Cancer (MSK, JNCI 2021)	P-0026052-T01-IM6	Colorectal Cancer	Signet Ring Cell Adenocarcinoma of the Colon and Rectum	SMAD4	W268*	OncoKB: Likely Oncogenic, level NA, resistance NA;CIViC: NA;MyCancerGenome: not present;CancerHotspot: no;3DHotspot: no			MutationAssessor: NA;SIFT: NA;Polyphen-2: NA	Nonsense_Mutation	SNP	Diploid	1	SOMATIC	Unknown	MSKCC	18	48584725	48584725	G	A	18:g.48584725G>A	ENST00000342988.3:c.803G>A	0.1	0.0016	41	382	1	630	5	45485		Pathogenic			46	EO	Over_35	23.7	NW	4.4	0	OTHER	0.0022	IMPACT468	0	1		MSS
Colorectal Cancer (MSK, JNCI 2021)	P-0012722-T01-IM5	Colorectal Cancer	Colon Adenocarcinoma	SMAD4	Q449*	OncoKB: Likely Oncogenic, level NA, resistance NA;CIViC: NA;MyCancerGenome: not present;CancerHotspot: no;3DHotspot: no			MutationAssessor: NA;SIFT: NA;Polyphen-2: NA	Nonsense_Mutation	SNP	Diploid		SOMATIC	Unknown	MSKCC	18	48603044	48603044	C	T	18:g.48603044C>T	ENST00000342988.3:c.1345C>T	0.15		42	243		257	4	45608		Pathogenic			60	AO	AO	41.8	OB	3.9	0	fecal occult blood test positive	0.2701	IMPACT410	0	1		MSS
Colorectal Cancer (MSK, JNCI 2021)	P-0004140-T03-IM5	Colorectal Cancer	Colon Adenocarcinoma	SMAD4	X79_splice	OncoKB: Likely Oncogenic, level NA, resistance NA;CIViC: NA;MyCancerGenome: not present;CancerHotspot: no;3DHotspot: no			MutationAssessor: NA;SIFT: NA;Polyphen-2: NA	Splice_Site	DEL	Diploid		SOMATIC	Unknown	MSKCC	18	48573651	48573677	GATGGGAGGCTTCAGGTTAGTCTTATA	T	18:g.48573651_48573677delinsT	ENST00000342988.3:c.235_249+12delinsT	0.31		56	122		300	9	45334					59	AO	AO	23.4	NW	8.9	0	BRBPR; weight loss; abdominal pain; upper GI sx	0.2935	IMPACT410	0	1		MSS
Colorectal Cancer (MSK, JNCI 2021)	P-0004441-T01-IM5	Colorectal Cancer	Colon Adenocarcinoma	SMAD4	Q450Lfs*17	OncoKB: Likely Oncogenic, level NA, resistance NA;CIViC: NA;MyCancerGenome: not present;CancerHotspot: no;3DHotspot: no			MutationAssessor: NA;SIFT: NA;Polyphen-2: NA	Frame_Shift_Del	DEL	Diploid	1	SOMATIC	Unknown	MSKCC	18	48603039	48603066	TGCAGCAGCAGGCGGCTACTGCACAAGC	-	18:g.48603039_48603066del	ENST00000342988.3:c.1349_1376del	0.33		135	269		478	8	45608		Pathogenic			59	AO	AO	25.2	OW	7.9	0	brbpr, weight loss, increased bowel movements	0.1954	IMPACT410	0			MSS
Colorectal Cancer (MSK, JNCI 2021)	P-0003046-T01-IM5	Colorectal Cancer	Colon Adenocarcinoma	SMAD4	E49_K50delinsD*	OncoKB: Likely Oncogenic, level NA, resistance NA;CIViC: NA;MyCancerGenome: not present;CancerHotspot: no;3DHotspot: no			MutationAssessor: NA;SIFT: NA;Polyphen-2: NA	Nonsense_Mutation	DNP	Diploid		SOMATIC	Unknown	MSKCC	18	48573563	48573564	GA	TT	18:g.48573563_48573564delinsTT	ENST00000342988.3:c.147_148delinsTT	0.26		61	178		401	8	45334					55	AO	AO	27	OW	7.9	0	abdominal pain	0.138	IMPACT410	0			MSS
Colorectal Cancer (MSK, JNCI 2021)	P-0009362-T01-IM5	Colorectal Cancer	Rectal Adenocarcinoma	SMAD4	Y260*	OncoKB: Likely Oncogenic, level NA, resistance NA;CIViC: NA;MyCancerGenome: not present;CancerHotspot: no;3DHotspot: no			MutationAssessor: NA;SIFT: NA;Polyphen-2: NA	Frame_Shift_Del	DEL	Diploid	3	SOMATIC	Unknown	MSKCC	18	48584605	48584612	TACCATCA	-	18:g.48584605_48584612del	ENST00000342988.3:c.780_787del	0.07		36	469		297	9	45455					69	AO	AO	25	OW	8.9	0	change in bowel habits, brbpr, diarrhea	0.1114	IMPACT410	1	1		MSS
Colorectal Cancer (MSK, JNCI 2021)	P-0009712-T01-IM5	Colorectal Cancer	Rectal Adenocarcinoma	SMAD4	E538Ffs*12	OncoKB: Likely Oncogenic, level NA, resistance NA;CIViC: NA;MyCancerGenome: not present;CancerHotspot: no;3DHotspot: no			MutationAssessor: NA;SIFT: NA;Polyphen-2: NA	Frame_Shift_Del	DEL	Diploid	4	SOMATIC	Unknown	MSKCC	18	48604788	48604794	ACGAAGT	-	18:g.48604788_48604794del	ENST00000342988.3:c.1612_1618del	0.13		100	698		477	6	45638					48	EO	Over_35	27.5	OW	5.9		OTHER	0.0041	IMPACT410		0		MSS
Colorectal Cancer (MSK, JNCI 2021)	P-0009303-T01-IM5	Colorectal Cancer	Colon Adenocarcinoma	SMAD4	A532D	OncoKB: Likely Oncogenic, level NA, resistance NA;CIViC: NA;MyCancerGenome: not present;CancerHotspot: no;3DHotspot: no			MutationAssessor: impact: medium, score: 3.205;SIFT: impact: deleterious, score: 0;Polyphen-2: impact: probably_damaging, score: 0.965	Missense_Mutation	SNP	Diploid	2	SOMATIC	Unknown	MSKCC	18	48604773	48604773	C	A	18:g.48604773C>A	ENST00000342988.3:c.1595C>A	0.19		143	608		331	8	45638		Uncertain_significance			64	AO	AO	26	OW	7.9	0	anemia	0.0277	IMPACT410	0	0		MSS
Colorectal Cancer (MSK, JNCI 2021)	P-0010343-T02-IM6	Colorectal Cancer	Colon Adenocarcinoma	SMAD4	K507*	OncoKB: Likely Oncogenic, level NA, resistance NA;CIViC: NA;MyCancerGenome: not present;CancerHotspot: no;3DHotspot: no			MutationAssessor: NA;SIFT: NA;Polyphen-2: NA	Nonsense_Mutation	INS	Diploid		SOMATIC	Unknown	MSKCC	18	48604696	48604699	GAAA	TTGAT	18:g.48604696_48604699delinsTTGAT	ENST00000342988.3:c.1518_1521delinsTTGAT	0.51	0.002	249	243	1	501	4	45638					48	EO	Over_35	30	OB	3.5	1	BRBPR	0.2563	IMPACT468	0	0		MSS
Colorectal Cancer (MSK, JNCI 2021)	P-0011366-T01-IM5	Colorectal Cancer	Colon Adenocarcinoma	SMAD4	H287Tfs*46	OncoKB: Likely Oncogenic, level NA, resistance NA;CIViC: NA;MyCancerGenome: not present;CancerHotspot: no;3DHotspot: no			MutationAssessor: NA;SIFT: NA;Polyphen-2: NA	Frame_Shift_Del	DEL	Diploid		SOMATIC	Unknown	MSKCC	18	48584779	48584788	GCCATCTTCA	-	18:g.48584779_48584788del	ENST00000342988.3:c.859_868del	0.15		152	864		557	13	45485					63	AO	AO	17.9	UW	12.8	0	anemia	0.1515	IMPACT410	0	0		MSS
Colorectal Cancer (MSK, JNCI 2021)	P-0011366-T01-IM5	Colorectal Cancer	Colon Adenocarcinoma	SMAD4	H530Tfs*7	OncoKB: Likely Oncogenic, level NA, resistance NA;CIViC: NA;MyCancerGenome: not present;CancerHotspot: no;3DHotspot: no			MutationAssessor: NA;SIFT: NA;Polyphen-2: NA	Frame_Shift_Del	DEL	Diploid		SOMATIC	Unknown	MSKCC	18	48604766	48604766	C	-	18:g.48604766del	ENST00000342988.3:c.1588del	0.31	0.0022	243	540	1	455	13	45638					63	AO	AO	17.9	UW	12.8	0	anemia	0.1515	IMPACT410	0	0		MSS
Colorectal Cancer (MSK, JNCI 2021)	P-0013822-T02-IM6	Colorectal Cancer	Colon Adenocarcinoma	SMAD4	G508F	OncoKB: Likely Oncogenic, level NA, resistance NA;CIViC: NA;MyCancerGenome: not present;CancerHotspot: no;3DHotspot: no			MutationAssessor: NA;SIFT: impact: deleterious, score: 0;Polyphen-2: impact: probably_damaging, score: 0.996	Missense_Mutation	DNP	Diploid		SOMATIC	Unknown	MSKCC	18	48604700	48604701	GG	TT	18:g.48604700_48604701delinsTT	ENST00000342988.3:c.1522_1523delinsTT	0.23	0.0021	133	437	1	466	7	45638					74	AO	AO	24.6	NW	6.1	1	incidentally found on colonoscopy	0.4041	IMPACT468	1	0		MSS
Colorectal Cancer (MSK, JNCI 2021)	P-0036522-T01-IM6	Colorectal Cancer	Colorectal Adenocarcinoma	SMAD4	K88*	OncoKB: Likely Oncogenic, level NA, resistance NA;CIViC: NA;MyCancerGenome: not present;CancerHotspot: no;3DHotspot: no			MutationAssessor: NA;SIFT: NA;Polyphen-2: NA	Nonsense_Mutation	SNP	Diploid		SOMATIC	Unknown	MSKCC	18	48575068	48575068	A	T	18:g.48575068A>T	ENST00000342988.3:c.262A>T	0.12		63	484		367	7	45363					47	EO	Over_35	20.1	NW	7	0	SCREENING COLONOSCOPY	0.0006	IMPACT468	0	0		MSS
Colorectal Cancer (MSK, JNCI 2021)	P-0037026-T01-IM6	Colorectal Cancer	Colorectal Adenocarcinoma	SMAD4	K88*	OncoKB: Likely Oncogenic, level NA, resistance NA;CIViC: NA;MyCancerGenome: not present;CancerHotspot: no;3DHotspot: no			MutationAssessor: NA;SIFT: NA;Polyphen-2: NA	Nonsense_Mutation	SNP	Diploid		SOMATIC	Unknown	MSKCC	18	48575068	48575068	A	T	18:g.48575068A>T	ENST00000342988.3:c.262A>T	0.42		131	178		445	10	45363					44	EO	Over_35	26.1	OW	8.8	0	BRBPR	0.5647	IMPACT468	0			MSS
Colorectal Cancer (MSK, JNCI 2021)	P-0040062-T01-IM6	Colorectal Cancer	Colorectal Adenocarcinoma	SMAD4	Q448*	OncoKB: Likely Oncogenic, level NA, resistance NA;CIViC: NA;MyCancerGenome: not present;CancerHotspot: no;3DHotspot: no			MutationAssessor: NA;SIFT: NA;Polyphen-2: NA	Nonsense_Mutation	SNP	Diploid	2	SOMATIC	Unknown	MSKCC	18	48603041	48603041	C	T	18:g.48603041C>T	ENST00000342988.3:c.1342C>T	0.19		79	348		283	11	45608					37	EO	Over_35	26.3	OW	9.7	0	BRBPR; CHANGE IN BOWEL HABITS	0.2891	IMPACT468	0	0		MSS
Colorectal Cancer (MSK, JNCI 2021)	P-0007489-T01-IM5	Colorectal Cancer	Colon Adenocarcinoma	SMAD4	H427Sfs*2	OncoKB: Likely Oncogenic, level NA, resistance NA;CIViC: NA;MyCancerGenome: not present;CancerHotspot: no;3DHotspot: no			MutationAssessor: NA;SIFT: NA;Polyphen-2: NA	Frame_Shift_Ins	INS	Diploid		SOMATIC	Unknown	MSKCC	18	48593525	48593526	-	T	18:g.48593525_48593526insT	ENST00000342988.3:c.1278dup	0.66		65	33		220	5	45577					39	EO	Over_35	22.4	NW	4.9	0	ABDOMINAL PAIN, BLOATING/ABDOMINAL GIRTH/PELVIC PRESSURE,PAIN	0.2602	IMPACT410	0	1		MSS
Colorectal Cancer (MSK, JNCI 2021)	P-0017983-T01-IM6	Colorectal Cancer	Colon Adenocarcinoma	SMAD4	C71Nfs*24	OncoKB: Likely Oncogenic, level NA, resistance NA;CIViC: NA;MyCancerGenome: not present;CancerHotspot: no;3DHotspot: no			MutationAssessor: NA;SIFT: NA;Polyphen-2: NA	Frame_Shift_Ins	INS	Diploid		SOMATIC	Unknown	MSKCC	18	48573623	48573624	-	AA	18:g.48573623_48573624insAA	ENST00000342988.3:c.209_210dup	0.24	0.0016	113	356	1	626	8	45334					39	EO	Over_35	21.5	NW	7	1	OTHER	0.1517	IMPACT468	1	1		MSS
Colorectal Cancer (MSK, JNCI 2021)	P-0025157-T01-IM6	Colorectal Cancer	Colon Adenocarcinoma	SMAD4	L238Ffs*26	OncoKB: Likely Oncogenic, level NA, resistance NA;CIViC: NA;MyCancerGenome: not present;CancerHotspot: no;3DHotspot: no			MutationAssessor: NA;SIFT: NA;Polyphen-2: NA	Frame_Shift_Ins	INS	Diploid		SOMATIC	Unknown	MSKCC	18	48584538	48584539	-	T	18:g.48584538_48584539insT	ENST00000342988.3:c.713dup	0.88		315	44		542	8	45455					43	EO	Over_35	35.8	OB	7	0	BRBPR	0.4438	IMPACT468	0	1		MSS
Colorectal Cancer (MSK, JNCI 2021)	P-0024928-T01-IM6	Colorectal Cancer	Colon Adenocarcinoma	SMAD4	F166*	OncoKB: Likely Oncogenic, level NA, resistance NA;CIViC: NA;MyCancerGenome: not present;CancerHotspot: no;3DHotspot: no			MutationAssessor: NA;SIFT: NA;Polyphen-2: NA	Frame_Shift_Del	DEL	Diploid		SOMATIC	Unknown	MSKCC	18	48581192	48581193	TT	-	18:g.48581192_48581193del	ENST00000342988.3:c.497_498del	0.23		98	334		404	49	45424					48	EO	Over_35	25.9	OW	43	0	ANEMIA	0.0263	IMPACT468	0			MSI
Colorectal Cancer (MSK, JNCI 2021)	P-0010203-T01-IM5	Colorectal Cancer	Rectal Adenocarcinoma	SMAD4	T62Nfs*8	OncoKB: Likely Oncogenic, level NA, resistance NA;CIViC: NA;MyCancerGenome: not present;CancerHotspot: no;3DHotspot: no			MutationAssessor: NA;SIFT: NA;Polyphen-2: NA	Frame_Shift_Ins	INS	Diploid		SOMATIC	Unknown	MSKCC	18	48573597	48573598	-	T	18:g.48573597_48573598insT	ENST00000342988.3:c.182dup	0.12		49	345		336	8	45334					33	EO	Under_35	25.7	OW	7.9	0	BRBPR	0.3044	IMPACT410	0	1		MSS
Colorectal Cancer (MSK, JNCI 2021)	P-0002488-T01-IM3	Colorectal Cancer	Rectal Adenocarcinoma	SMAD4	SMAD4 intragenic	OncoKB: Likely Oncogenic, level NA, resistance NA;CIViC: NA;MyCancerGenome: not present;CancerHotspot: no;3DHotspot: no			MutationAssessor: NA;SIFT: NA;Polyphen-2: NA	fusion	DELETION	Diploid		SOMATIC		N/A	18	48604772												9						64	AO	AO	25.6	OW	10	0	left abdominal pain, bloating, constipation	0.7621	IMPACT341	1	0		MSS
Colorectal Cancer (MSK, JNCI 2021)	P-0006207-T01-IM5	Colorectal Cancer	Colon Adenocarcinoma	SMAD4	C523R	OncoKB: Unknown, level NA, resistance NA;CIViC: NA;MyCancerGenome: not present;CancerHotspot: no;3DHotspot: yes			MutationAssessor: impact: high, score: 4.135;SIFT: impact: deleterious, score: 0.01;Polyphen-2: impact: possibly_damaging, score: 0.781	Missense_Mutation	SNP	Diploid	3	SOMATIC	Unknown	MSKCC	18	48604745	48604745	T	C	18:g.48604745T>C	ENST00000342988.3:c.1567T>C	0.21		125	481		433	60	45638					78	AO	AO	30.5	OB	59	0	BRBPR; change in bowel habits	0	IMPACT410	1			MSI
Colorectal Cancer (MSK, JNCI 2021)	P-0004403-T01-IM5	Colorectal Cancer	Rectal Adenocarcinoma	SMAD4	R97H	OncoKB: Unknown, level NA, resistance NA;CIViC: NA;MyCancerGenome: not present;CancerHotspot: no;3DHotspot: yes			MutationAssessor: impact: medium, score: 3;SIFT: impact: tolerated, score: 0.08;Polyphen-2: impact: probably_damaging, score: 0.999	Missense_Mutation	SNP	Diploid	2	SOMATIC	Unknown	MSKCC	18	48575096	48575096	G	A	18:g.48575096G>A	ENST00000342988.3:c.290G>A	0.17	0.0019	58	277	1	513	6	45363		Uncertain_significance			68	AO	AO	36.4	OB	5.9	0	BRBPR; weight loss	0.1079	IMPACT410	1	0		MSS
Colorectal Cancer (MSK, JNCI 2021)	P-0036053-T01-IM6	Colorectal Cancer	Colon Adenocarcinoma	SMAD4	G365S	OncoKB: Unknown, level NA, resistance NA;CIViC: NA;MyCancerGenome: not present;CancerHotspot: no;3DHotspot: yes			MutationAssessor: impact: medium, score: 2.89;SIFT: impact: deleterious, score: 0;Polyphen-2: impact: probably_damaging, score: 1	Missense_Mutation	SNP	Diploid	2	SOMATIC	Unknown	MSKCC	18	48591930	48591930	G	A	18:g.48591930G>A	ENST00000342988.3:c.1093G>A	0.55		116	94		359	5	45547					44	EO	Over_35	23.3	NW	4.4	0	SCREENING COLONOSCOPY	0.4867	IMPACT468	0	1		MSS
Colorectal Cancer (MSK, JNCI 2021)	P-0011396-T01-IM5	Colorectal Cancer	Rectal Adenocarcinoma	SMAD4	C499R	OncoKB: Unknown, level NA, resistance NA;CIViC: NA;MyCancerGenome: not present;CancerHotspot: no;3DHotspot: no			MutationAssessor: impact: high, score: 3.64;SIFT: impact: deleterious, score: 0;Polyphen-2: impact: possibly_damaging, score: 0.47	Missense_Mutation	SNP	Diploid	4	SOMATIC	Unknown	MSKCC	18	48604673	48604673	T	C	18:g.48604673T>C	ENST00000342988.3:c.1495T>C	0.05		45	836		345	6	45638		Likely_pathogenic			54	AO	AO	27.1	OW	5.9	0	Other: Nausea; vomitting	0.0044	IMPACT410	0			MSS
Colorectal Cancer (MSK, JNCI 2021)	P-0013941-T01-IM5	Colorectal Cancer	Colon Adenocarcinoma	SMAD4	A406V	OncoKB: Unknown, level NA, resistance NA;CIViC: NA;MyCancerGenome: not present;CancerHotspot: no;3DHotspot: no			MutationAssessor: impact: medium, score: 2.89;SIFT: impact: tolerated, score: 0.09;Polyphen-2: impact: probably_damaging, score: 0.993	Missense_Mutation	SNP	Diploid	5	SOMATIC	Unknown	MSKCC	18	48593466	48593466	C	T	18:g.48593466C>T	ENST00000342988.3:c.1217C>T	0.12	0.002	113	806	1	495	10	45577		Uncertain_significance			51	AO	AO	32.8	OB	9.8	0	blood in stool, guaiac in stool	0.0259	IMPACT410	1	0		MSS
Colorectal Cancer (MSK, JNCI 2021)	P-0036621-T01-IM6	Colorectal Cancer	Rectal Adenocarcinoma	SMAD4	A406V	OncoKB: Unknown, level NA, resistance NA;CIViC: NA;MyCancerGenome: not present;CancerHotspot: no;3DHotspot: no			MutationAssessor: impact: medium, score: 2.89;SIFT: impact: tolerated, score: 0.09;Polyphen-2: impact: probably_damaging, score: 0.993	Missense_Mutation	SNP	Diploid	5	SOMATIC	Unknown	MSKCC	18	48593466	48593466	C	T	18:g.48593466C>T	ENST00000342988.3:c.1217C>T	0.19		68	289		285	7	45577		Uncertain_significance			49	EO	Over_35	25.7	OW	6.1	0	CHANGE IN BOWEL HABITS; BRBPR	0.0221	IMPACT468	0			MSS
Colorectal Cancer (MSK, JNCI 2021)	P-0004865-T01-IM5	Colorectal Cancer	Colon Adenocarcinoma	SMAD4	A406T	OncoKB: Unknown, level NA, resistance NA;CIViC: NA;MyCancerGenome: not present;CancerHotspot: no;3DHotspot: no			MutationAssessor: impact: medium, score: 2.545;SIFT: impact: deleterious, score: 0.01;Polyphen-2: impact: probably_damaging, score: 0.988	Missense_Mutation	SNP	Diploid	5	SOMATIC	Unknown	MSKCC	18	48593465	48593465	G	A	18:g.48593465G>A	ENST00000342988.3:c.1216G>A	0.24	0.0035	188	599	2	573	147	45577		Uncertain_significance			55	AO	AO	33	OB	143.6	0	Change in bowel habits; FOBT+	0	IMPACT410	0			POLE
Colorectal Cancer (MSK, JNCI 2021)	P-0011084-T02-IM5	Colorectal Cancer	Colon Adenocarcinoma	SMAD4	L104F	OncoKB: Unknown, level NA, resistance NA;CIViC: NA;MyCancerGenome: not present;CancerHotspot: no;3DHotspot: no			MutationAssessor: impact: medium, score: 3.425;SIFT: impact: deleterious, score: 0;Polyphen-2: impact: probably_damaging, score: 1	Missense_Mutation	SNP	Diploid	1	SOMATIC	Unknown	MSKCC	18	48575116	48575116	C	T	18:g.48575116C>T	ENST00000342988.3:c.310C>T	0.08		47	568		417	6	45363					58	AO	AO	21.8	NW	5.9	0	constipation, increased bowel sounds	0.002	IMPACT410	1	1		MSS
Colorectal Cancer (MSK, JNCI 2021)	P-0028864-T01-IM6	Colorectal Cancer	Colon Adenocarcinoma	SMAD4	W509R	OncoKB: Inconclusive, level NA, resistance NA;CIViC: NA;MyCancerGenome: not present;CancerHotspot: no;3DHotspot: no			MutationAssessor: impact: high, score: 4.1;SIFT: impact: deleterious, score: 0;Polyphen-2: impact: probably_damaging, score: 1	Missense_Mutation	SNP	Diploid	2	SOMATIC	Unknown	MSKCC	18	48604703	48604703	T	C	18:g.48604703T>C	ENST00000342988.3:c.1525T>C	0.42		202	282		424	7	45638					46	EO	Over_35	30.8	OB	6.1	0	ABDOMINAL PAIN, BLOATING/ABDOMINAL GIRTH/PELVIC PRESSURE,PAIN; CHANGE IN BOWEL HABITS	0.0635	IMPACT468	0	1		MSS
Colorectal Cancer (MSK, JNCI 2021)	P-0008063-T01-IM5	Colorectal Cancer	Colon Adenocarcinoma	SMAD4	G358E	OncoKB: Unknown, level NA, resistance NA;CIViC: NA;MyCancerGenome: not present;CancerHotspot: no;3DHotspot: no			MutationAssessor: impact: low, score: 1.81;SIFT: impact: deleterious, score: 0.01;Polyphen-2: impact: probably_damaging, score: 0.999	Missense_Mutation	SNP	Diploid		SOMATIC	Unknown	MSKCC	18	48591910	48591910	G	A	18:g.48591910G>A	ENST00000342988.3:c.1073G>A	0.09		53	552		565	7	45547					40	EO	Over_35	25.3	OW	6.9	0	ABDOMINAL PAIN, BLOATING/ABDOMINAL GIRTH/PELVIC PRESSURE,PAIN	0	IMPACT410	0	1		MSS
Colorectal Cancer (MSK, JNCI 2021)	P-0000862-T01-IM3	Colorectal Cancer	Colon Adenocarcinoma	SMAD4	P244H	OncoKB: Unknown, level NA, resistance NA;CIViC: NA;MyCancerGenome: not present;CancerHotspot: no;3DHotspot: no			MutationAssessor: impact: low, score: 1.545;SIFT: impact: deleterious, score: 0.04;Polyphen-2: impact: benign, score: 0.06	Missense_Mutation	SNP	Diploid		SOMATIC	Unknown	MSKCC	18	48584558	48584558	C	A	18:g.48584558C>A	ENST00000342988.3:c.731C>A	0.07		40	508		503	49	45455					74	AO	AO	26.8	OW	54.6	0	ABNORMAL IMAGING	0.1389	IMPACT341	0			MSI
Colorectal Cancer (MSK, JNCI 2021)	P-0011455-T01-IM5	Colorectal Cancer	Rectal Adenocarcinoma	SMAD4	D360Y	OncoKB: Unknown, level NA, resistance NA;CIViC: NA;MyCancerGenome: not present;CancerHotspot: no;3DHotspot: no			MutationAssessor: impact: medium, score: 2.92;SIFT: impact: deleterious, score: 0;Polyphen-2: impact: probably_damaging, score: 0.989	Missense_Mutation	SNP	Diploid		SOMATIC	Unknown	MSKCC	18	48591915	48591915	G	T	18:g.48591915G>T	ENST00000342988.3:c.1078G>T	0.09		86	884		558	6	45547					55	AO	AO	28.4	OW	5.9		diarrhea, constipation	0.1699	IMPACT410		1		MSS
Colorectal Cancer (MSK, JNCI 2021)	P-0037898-T01-IM6	Colorectal Cancer	Colon Adenocarcinoma	SMAD4	I74T	OncoKB: Unknown, level NA, resistance NA;CIViC: NA;MyCancerGenome: not present;CancerHotspot: no;3DHotspot: no			MutationAssessor: impact: medium, score: 3.465;SIFT: impact: deleterious, score: 0.05;Polyphen-2: impact: probably_damaging, score: 1	Missense_Mutation	SNP	Diploid		SOMATIC	Unknown	MSKCC	18	48573637	48573637	T	C	18:g.48573637T>C	ENST00000342988.3:c.221T>C	0.11		17	138		254	216	45334					29	EO	Under_35	20.1	NW	189.6	0	CHANGE IN BOWEL HABITS; WEIGHT LOSS	0.0126	IMPACT468	0			POLE
Colorectal Cancer (MSK, JNCI 2021)	P-0021497-T01-IM6	Colorectal Cancer	Colon Adenocarcinoma	SMAD4	F362V	OncoKB: Unknown, level NA, resistance NA;CIViC: NA;MyCancerGenome: not present;CancerHotspot: no;3DHotspot: no			MutationAssessor: impact: high, score: 3.96;SIFT: impact: deleterious, score: 0;Polyphen-2: impact: probably_damaging, score: 1	Missense_Mutation	SNP	Diploid		SOMATIC	Unknown	MSKCC	18	48591921	48591921	T	G	18:g.48591921T>G	ENST00000342988.3:c.1084T>G	0.19		118	498		556	15	45547					47	EO	Over_35	34.6	OB	13.2		FATIGUE; ANEMIA	0.1094	IMPACT468		1		MSS
Colorectal Cancer (MSK, JNCI 2021)	P-0035103-T01-IM6	Colorectal Cancer	Colorectal Adenocarcinoma	SMAD4	G231D	OncoKB: Unknown, level NA, resistance NA;CIViC: NA;MyCancerGenome: not present;CancerHotspot: no;3DHotspot: no			MutationAssessor: impact: low, score: 1.905;SIFT: impact: tolerated, score: 0.09;Polyphen-2: impact: benign, score: 0.015	Missense_Mutation	SNP	Diploid		SOMATIC	Unknown	MSKCC	18	48584519	48584519	G	A	18:g.48584519G>A	ENST00000342988.3:c.692G>A	0.12		68	521		403	133	45455		Uncertain_significance			32	EO	Under_35	30	OB	116.7	0	BRBPR; OTHER	0.1209	IMPACT468	0			POLE
Colorectal Cancer (MSK, JNCI 2021)	P-0027929-T01-IM6	Colorectal Cancer	Rectal Adenocarcinoma	SMAD4	D165V	OncoKB: Unknown, level NA, resistance NA;CIViC: NA;MyCancerGenome: not present;CancerHotspot: no;3DHotspot: no			MutationAssessor: impact: low, score: 1.93;SIFT: impact: deleterious, score: 0.04;Polyphen-2: impact: possibly_damaging, score: 0.462	Missense_Mutation	SNP	Diploid		SOMATIC	Unknown	MSKCC	18	48581190	48581190	A	T	18:g.48581190A>T	ENST00000342988.3:c.494A>T	0.28	0.0028	171	431	1	354	419	45424					31	EO	Under_35			368.6	0		0.0262	IMPACT468	0
Colorectal Cancer (MSK, JNCI 2021)	P-0023285-T01-IM6	Colorectal Cancer	Signet Ring Cell Adenocarcinoma of the Colon and Rectum	SMAD4	I40N	OncoKB: Unknown, level NA, resistance NA;CIViC: NA;MyCancerGenome: not present;CancerHotspot: no;3DHotspot: no			MutationAssessor: impact: medium, score: 3.02;SIFT: impact: deleterious, score: 0;Polyphen-2: impact: probably_damaging, score: 1	Missense_Mutation	SNP	Diploid		SOMATIC	Unknown	MSKCC	18	48573535	48573535	T	A	18:g.48573535T>A	ENST00000342988.3:c.119T>A	0.12		34	248		477	6	45334					28	EO	Under_35	22	NW	5.3	0	ABDOMINAL PAIN, BLOATING/ABDOMINAL GIRTH/PELVIC PRESSURE,PAIN	0.0125	IMPACT468	0			MSS
[truncated: 24 more columns]

## Sheet: Table S7
	Table S7: Mutation frequencies of KRAS mutations in CRC-PM and CRC patients
	KRAS Mutation	Type	Mut	Wt	Frequency (%)
	G12D	CRC	83	611	11.96
		CRC-PM	21	103	16.94
	G12V	CRC	70	624	10.1
		CRC-PM	12	112	9.68
	G13D	CRC	54	640	7.78
		CRC-PM	12	112	9.68
	G12C	CRC	19	675	2.74
		CRC-PM	6	118	4.84
	G12A	CRC	18	676	2.59
		CRC-PM	5	119	4.03
	G12R	CRC	4	690	0.58
		CRC-PM	1	123	0.81
	G12S	CRC	11	683	1.59
		CRC-PM	1	123	0.81
								*

## Sheet: Table S8
Table S8: SMAD4 mutations from 312 CRC patients								cBioPortal for Cancer Genomics
Study of Origin	Sample ID	Cancer Type	Cancer Type Detailed	Protein Change	ClinVar	Annotation	Mutation Type	Chromosome	Start Pos	End Pos	REF
Appendiceal Cancer (MSK, J Clin Oncol 2022)	P-0002322-T01-IM3	Appendiceal Cancer	Goblet Cell Adenocarcinoma of the Appendix	G365_E377del		OncoKB: Likely Oncogenic, level NA, resistance NA;CIViC: NA;MyCancerGenome: not present;CancerHotspot: yes;3DHotspot: no	In_Frame_Del	18	48591929	48591967	doi： 10.1200/JCO.22.01392.
Appendiceal Cancer (MSK, J Clin Oncol 2022)	P-0003657-T01-IM5	Appendiceal Cancer	Goblet Cell Adenocarcinoma of the Appendix	R361C	Pathogenic	OncoKB: Likely Oncogenic, level NA, resistance NA;CIViC: diagnosticCount: 0, predictiveCount: 0, prognosticCount: 0, predisposingCount: 1, oncogenicCount: 0, functionalCount: 2;MyCancerGenome: present;CancerHotspot: yes;3DHotspot: yes	Missense_Mutation	18	48591918	48591918	doi： 10.1200/JCO.22.01392.
Appendiceal Cancer (MSK, J Clin Oncol 2022)	P-0003657-T01-IM5	Appendiceal Cancer	Goblet Cell Adenocarcinoma of the Appendix	SKA1-SMAD4 Fusion		OncoKB: Likely Oncogenic, level NA, resistance NA;CIViC: NA;MyCancerGenome: not present;CancerHotspot: no;3DHotspot: no	fusion	18	47978493		doi： 10.1200/JCO.22.01392.
Appendiceal Cancer (MSK, J Clin Oncol 2022)	P-0008142-T02-IM5	Appendiceal Cancer	Colonic Type Adenocarcinoma of the Appendix	R445*	Pathogenic	OncoKB: Likely Oncogenic, level NA, resistance NA;CIViC: NA;MyCancerGenome: not present;CancerHotspot: no;3DHotspot: no	Nonsense_Mutation	18	48603032	48603032	doi： 10.1200/JCO.22.01392.
Appendiceal Cancer (MSK, J Clin Oncol 2022)	P-0011073-T01-IM5	Appendiceal Cancer	Mucinous Adenocarcinoma of the Appendix	P91Lfs*3		OncoKB: Likely Oncogenic, level NA, resistance NA;CIViC: NA;MyCancerGenome: not present;CancerHotspot: no;3DHotspot: no	Frame_Shift_Del	18	48575077	48575077	doi： 10.1200/JCO.22.01392.
Appendiceal Cancer (MSK, J Clin Oncol 2022)	P-0011271-T01-IM5	Appendiceal Cancer	Colonic Type Adenocarcinoma of the Appendix	S138*	Pathogenic	OncoKB: Likely Oncogenic, level NA, resistance NA;CIViC: NA;MyCancerGenome: not present;CancerHotspot: no;3DHotspot: no	Nonsense_Mutation	18	48575219	48575219	doi： 10.1200/JCO.22.01392.
Appendiceal Cancer (MSK, J Clin Oncol 2022)	P-0012054-T01-IM5	Appendiceal Cancer	Mucinous Adenocarcinoma of the Appendix	R361S	Likely_pathogenic	OncoKB: Likely Oncogenic, level NA, resistance NA;CIViC: NA;MyCancerGenome: present;CancerHotspot: yes;3DHotspot: yes	Missense_Mutation	18	48591918	48591918	doi： 10.1200/JCO.22.01392.
Appendiceal Cancer (MSK, J Clin Oncol 2022)	P-0012054-T01-IM5	Appendiceal Cancer	Mucinous Adenocarcinoma of the Appendix	R445*	Pathogenic	OncoKB: Likely Oncogenic, level NA, resistance NA;CIViC: NA;MyCancerGenome: not present;CancerHotspot: no;3DHotspot: no	Nonsense_Mutation	18	48603032	48603032	doi： 10.1200/JCO.22.01392.
Appendiceal Cancer (MSK, J Clin Oncol 2022)	P-0014674-T01-IM6	Appendiceal Cancer	Colonic Type Adenocarcinoma of the Appendix	L533V		OncoKB: Unknown, level NA, resistance NA;CIViC: NA;MyCancerGenome: not present;CancerHotspot: no;3DHotspot: no	Missense_Mutation	18	48604775	48604775	doi： 10.1200/JCO.22.01392.
Appendiceal Cancer (MSK, J Clin Oncol 2022)	P-0018729-T01-IM6	Appendiceal Cancer	Goblet Cell Adenocarcinoma of the Appendix	G365D		OncoKB: Unknown, level NA, resistance NA;CIViC: NA;MyCancerGenome: not present;CancerHotspot: no;3DHotspot: yes	Missense_Mutation	18	48591931	48591931	doi： 10.1200/JCO.22.01392.
Appendiceal Cancer (MSK, J Clin Oncol 2022)	P-0019061-T01-IM6	Appendiceal Cancer	Goblet Cell Adenocarcinoma of the Appendix	D537V	Uncertain_significance	OncoKB: Likely Oncogenic, level NA, resistance NA;CIViC: NA;MyCancerGenome: present;CancerHotspot: yes;3DHotspot: no	Missense_Mutation	18	48604788	48604788	doi： 10.1200/JCO.22.01392.
Appendiceal Cancer (MSK, J Clin Oncol 2022)	P-0020414-T01-IM6	Appendiceal Cancer	Colonic Type Adenocarcinoma of the Appendix	A532Pfs*5		OncoKB: Likely Oncogenic, level NA, resistance NA;CIViC: NA;MyCancerGenome: not present;CancerHotspot: no;3DHotspot: no	Frame_Shift_Del	18	48604770	48604770	doi： 10.1200/JCO.22.01392.
Appendiceal Cancer (MSK, J Clin Oncol 2022)	P-0022171-T01-IM6	Appendiceal Cancer	Mucinous Adenocarcinoma of the Appendix	D424V		OncoKB: Unknown, level NA, resistance NA;CIViC: NA;MyCancerGenome: not present;CancerHotspot: no;3DHotspot: no	Missense_Mutation	18	48593520	48593520	doi： 10.1200/JCO.22.01392.
Appendiceal Cancer (MSK, J Clin Oncol 2022)	P-0023090-T01-IM6	Appendiceal Cancer	Mucinous Adenocarcinoma of the Appendix	D537_E538dup		OncoKB: Likely Oncogenic, level NA, resistance NA;CIViC: NA;MyCancerGenome: present;CancerHotspot: yes;3DHotspot: no	In_Frame_Ins	18	48604785	48604786	doi： 10.1200/JCO.22.01392.
Appendiceal Cancer (MSK, J Clin Oncol 2022)	P-0028106-T01-IM6	Appendiceal Cancer	Colonic Type Adenocarcinoma of the Appendix	H132Y	Uncertain_significance	OncoKB: Likely Oncogenic, level NA, resistance NA;CIViC: diagnosticCount: 0, predictiveCount: 0, prognosticCount: 0, predisposingCount: 0, oncogenicCount: 0, functionalCount: 1;MyCancerGenome: not present;CancerHotspot: no;3DHotspot: yes	Missense_Mutation	18	48575200	48575200	doi： 10.1200/JCO.22.01392.
Appendiceal Cancer (MSK, J Clin Oncol 2022)	P-0044082-T01-IM6	Appendiceal Cancer	Mucinous Adenocarcinoma of the Appendix	Q410*		OncoKB: Likely Oncogenic, level NA, resistance NA;CIViC: NA;MyCancerGenome: not present;CancerHotspot: no;3DHotspot: no	Nonsense_Mutation	18	48593477	48593477	doi： 10.1200/JCO.22.01392.
Appendiceal Cancer (MSK, J Clin Oncol 2022)	P-0044538-T01-IM6	Appendiceal Cancer	Mucinous Adenocarcinoma of the Appendix	G510R		OncoKB: Likely Oncogenic, level NA, resistance NA;CIViC: NA;MyCancerGenome: not present;CancerHotspot: yes;3DHotspot: no	Missense_Mutation	18	48604706	48604706	doi： 10.1200/JCO.22.01392.
Appendiceal Cancer (MSK, J Clin Oncol 2022)	P-0052100-T01-IM6	Appendiceal Cancer	Goblet Cell Adenocarcinoma of the Appendix	W524C	Likely_pathogenic	OncoKB: Likely Oncogenic, level NA, resistance NA;CIViC: NA;MyCancerGenome: not present;CancerHotspot: yes;3DHotspot: no	Missense_Mutation	18	48604750	48604750	doi： 10.1200/JCO.22.01392.
Colon Adenocarcinoma (CaseCCC, PNAS 2015)	coad_caseccc_15807	Colorectal Cancer	Colon Adenocarcinoma	W524R		OncoKB: Likely Oncogenic, level NA, resistance NA;CIViC: NA;MyCancerGenome: not present;CancerHotspot: yes;3DHotspot: no	Missense_Mutation	18	48604748	48604748	DOI： 10.1073/pnas.1417064112
Colon Adenocarcinoma (CaseCCC, PNAS 2015)	coad_caseccc_15873	Colorectal Cancer	Colon Adenocarcinoma	Q289*		OncoKB: Likely Oncogenic, level NA, resistance NA;CIViC: NA;MyCancerGenome: not present;CancerHotspot: no;3DHotspot: no	Nonsense_Mutation	18	48584787	48584787	DOI： 10.1073/pnas.1417064112
Colon Adenocarcinoma (CaseCCC, PNAS 2015)	coad_caseccc_5804	Colorectal Cancer	Colon Adenocarcinoma	D537G	Uncertain_significance	OncoKB: Likely Oncogenic, level NA, resistance NA;CIViC: NA;MyCancerGenome: present;CancerHotspot: yes;3DHotspot: no	Missense_Mutation	18	48604788	48604788	DOI： 10.1073/pnas.1417064112
Colon Adenocarcinoma (CaseCCC, PNAS 2015)	coad_caseccc_9029	Colorectal Cancer	Colon Adenocarcinoma	R361P	Likely_pathogenic	OncoKB: Likely Oncogenic, level NA, resistance NA;CIViC: NA;MyCancerGenome: present;CancerHotspot: yes;3DHotspot: yes	Missense_Mutation	18	48591919	48591919	DOI： 10.1073/pnas.1417064112
Colon Cancer (Sidra-LUMC AC-ICAM, Nat Med 2023)	SER-SILU-CC-P0007-PT-01	Colorectal Cancer	Colon Adenocarcinoma	R361H	Pathogenic	OncoKB: Likely Oncogenic, level NA, resistance NA;CIViC: NA;MyCancerGenome: present;CancerHotspot: yes;3DHotspot: yes	Missense_Mutation	18	48591919	48591919	doi： 10.1038/s41591-023-02324-5.
Colon Cancer (Sidra-LUMC AC-ICAM, Nat Med 2023)	SER-SILU-CC-P0007-PT-01	Colorectal Cancer	Colon Adenocarcinoma	E538Kfs*14		OncoKB: Likely Oncogenic, level NA, resistance NA;CIViC: NA;MyCancerGenome: not present;CancerHotspot: no;3DHotspot: no	Frame_Shift_Del	18	48604790	48604790	doi： 10.1038/s41591-023-02324-5.
Colon Cancer (Sidra-LUMC AC-ICAM, Nat Med 2023)	SER-SILU-CC-P0053-PT-01	Colorectal Cancer	Colon Adenocarcinoma	R420C	Uncertain_significance	OncoKB: Likely Oncogenic, level NA, resistance NA;CIViC: NA;MyCancerGenome: not present;CancerHotspot: no;3DHotspot: no	Missense_Mutation	18	48593507	48593507	doi： 10.1038/s41591-023-02324-5.
Colon Cancer (Sidra-LUMC AC-ICAM, Nat Med 2023)	SER-SILU-CC-P0080-PT-01	Colorectal Cancer	Colon Adenocarcinoma	G352E		OncoKB: Likely Oncogenic, level NA, resistance NA;CIViC: NA;MyCancerGenome: not present;CancerHotspot: yes;3DHotspot: yes	Missense_Mutation	18	48591892	48591892	doi： 10.1038/s41591-023-02324-5.
Colon Cancer (Sidra-LUMC AC-ICAM, Nat Med 2023)	SER-SILU-CC-P0090-PT-01	Colorectal Cancer	Colon Adenocarcinoma	C363F		OncoKB: Likely Oncogenic, level NA, resistance NA;CIViC: NA;MyCancerGenome: not present;CancerHotspot: yes;3DHotspot: yes	Missense_Mutation	18	48591925	48591925	doi： 10.1038/s41591-023-02324-5.
Colon Cancer (Sidra-LUMC AC-ICAM, Nat Med 2023)	SER-SILU-CC-P0095-PT-01	Colorectal Cancer	Colon Adenocarcinoma	D537G	Uncertain_significance	OncoKB: Likely Oncogenic, level NA, resistance NA;CIViC: NA;MyCancerGenome: present;CancerHotspot: yes;3DHotspot: no	Missense_Mutation	18	48604788	48604788	doi： 10.1038/s41591-023-02324-5.
Colon Cancer (Sidra-LUMC AC-ICAM, Nat Med 2023)	SER-SILU-CC-P0100-PT-01	Colorectal Cancer	Colon Adenocarcinoma	R496H	Uncertain_significance	OncoKB: Likely Oncogenic, level NA, resistance NA;CIViC: diagnosticCount: 0, predictiveCount: 0, prognosticCount: 0, predisposingCount: 0, oncogenicCount: 0, functionalCount: 1;MyCancerGenome: not present;CancerHotspot: no;3DHotspot: no	Missense_Mutation	18	48604665	48604665	doi： 10.1038/s41591-023-02324-5.
Colon Cancer (Sidra-LUMC AC-ICAM, Nat Med 2023)	SER-SILU-CC-P0100-PT-01	Colorectal Cancer	Colon Adenocarcinoma	E108*		OncoKB: Likely Oncogenic, level NA, resistance NA;CIViC: NA;MyCancerGenome: not present;CancerHotspot: no;3DHotspot: no	Nonsense_Mutation	18	48575128	48575128	doi： 10.1038/s41591-023-02324-5.
Colon Cancer (Sidra-LUMC AC-ICAM, Nat Med 2023)	SER-SILU-CC-P0104-PT-01	Colorectal Cancer	Colon Adenocarcinoma	R361C	Pathogenic	OncoKB: Likely Oncogenic, level NA, resistance NA;CIViC: diagnosticCount: 0, predictiveCount: 0, prognosticCount: 0, predisposingCount: 1, oncogenicCount: 0, functionalCount: 2;MyCancerGenome: present;CancerHotspot: yes;3DHotspot: yes	Missense_Mutation	18	48591918	48591918	doi： 10.1038/s41591-023-02324-5.
Colon Cancer (Sidra-LUMC AC-ICAM, Nat Med 2023)	SER-SILU-CC-P0104-PT-01	Colorectal Cancer	Colon Adenocarcinoma	V128G		OncoKB: Unknown, level NA, resistance NA;CIViC: NA;MyCancerGenome: not present;CancerHotspot: no;3DHotspot: no	Missense_Mutation	18	48575189	48575189	doi： 10.1038/s41591-023-02324-5.
Colon Cancer (Sidra-LUMC AC-ICAM, Nat Med 2023)	SER-SILU-CC-P0107-PT-01	Colorectal Cancer	Colon Adenocarcinoma	D493V		OncoKB: Likely Oncogenic, level NA, resistance NA;CIViC: NA;MyCancerGenome: not present;CancerHotspot: yes;3DHotspot: no	Missense_Mutation	18	48604656	48604656	doi： 10.1038/s41591-023-02324-5.
Colon Cancer (Sidra-LUMC AC-ICAM, Nat Med 2023)	SER-SILU-CC-P0122-PT-01	Colorectal Cancer	Colon Adenocarcinoma	G231Afs*10	Pathogenic	OncoKB: Likely Oncogenic, level NA, resistance NA;CIViC: NA;MyCancerGenome: not present;CancerHotspot: no;3DHotspot: no	Frame_Shift_Del	18	48584514	48584514	doi： 10.1038/s41591-023-02324-5.
Colon Cancer (Sidra-LUMC AC-ICAM, Nat Med 2023)	SER-SILU-CC-P0154-PT-01	Colorectal Cancer	Colon Adenocarcinoma	D332A		OncoKB: Unknown, level NA, resistance NA;CIViC: NA;MyCancerGenome: not present;CancerHotspot: no;3DHotspot: no	Missense_Mutation	18	48591832	48591832	doi： 10.1038/s41591-023-02324-5.
Colon Cancer (Sidra-LUMC AC-ICAM, Nat Med 2023)	SER-SILU-CC-P0158-PT-01	Colorectal Cancer	Colon Adenocarcinoma	G386R		OncoKB: Likely Oncogenic, level NA, resistance NA;CIViC: NA;MyCancerGenome: not present;CancerHotspot: yes;3DHotspot: yes	Missense_Mutation	18	48593405	48593405	doi： 10.1038/s41591-023-02324-5.
Colon Cancer (Sidra-LUMC AC-ICAM, Nat Med 2023)	SER-SILU-CC-P0198-PT-01	Colorectal Cancer	Colon Adenocarcinoma	D537G	Uncertain_significance	OncoKB: Likely Oncogenic, level NA, resistance NA;CIViC: NA;MyCancerGenome: present;CancerHotspot: yes;3DHotspot: no	Missense_Mutation	18	48604788	48604788	doi： 10.1038/s41591-023-02324-5.
Colon Cancer (Sidra-LUMC AC-ICAM, Nat Med 2023)	SER-SILU-CC-P0199-PT-01	Colorectal Cancer	Colon Adenocarcinoma	E538Ffs*12		OncoKB: Likely Oncogenic, level NA, resistance NA;CIViC: NA;MyCancerGenome: not present;CancerHotspot: no;3DHotspot: no	Frame_Shift_Del	18	48604788	48604794	doi： 10.1038/s41591-023-02324-5.
Colon Cancer (Sidra-LUMC AC-ICAM, Nat Med 2023)	SER-SILU-CC-P0214-PT-01	Colorectal Cancer	Colon Adenocarcinoma	R361H	Pathogenic	OncoKB: Likely Oncogenic, level NA, resistance NA;CIViC: NA;MyCancerGenome: present;CancerHotspot: yes;3DHotspot: yes	Missense_Mutation	18	48591919	48591919	doi： 10.1038/s41591-023-02324-5.
Colon Cancer (Sidra-LUMC AC-ICAM, Nat Med 2023)	SER-SILU-CC-P0259-PT-01	Colorectal Cancer	Colon Adenocarcinoma	R361H	Pathogenic	OncoKB: Likely Oncogenic, level NA, resistance NA;CIViC: NA;MyCancerGenome: present;CancerHotspot: yes;3DHotspot: yes	Missense_Mutation	18	48591919	48591919	doi： 10.1038/s41591-023-02324-5.
Colon Cancer (Sidra-LUMC AC-ICAM, Nat Med 2023)	SER-SILU-CC-P0288-PT-01	Colorectal Cancer	Colon Adenocarcinoma	R361H	Pathogenic	OncoKB: Likely Oncogenic, level NA, resistance NA;CIViC: NA;MyCancerGenome: present;CancerHotspot: yes;3DHotspot: yes	Missense_Mutation	18	48591919	48591919	doi： 10.1038/s41591-023-02324-5.
Colon Cancer (Sidra-LUMC AC-ICAM, Nat Med 2023)	SER-SILU-CC-P0299-PT-01	Colorectal Cancer	Colon Adenocarcinoma	R361H	Pathogenic	OncoKB: Likely Oncogenic, level NA, resistance NA;CIViC: NA;MyCancerGenome: present;CancerHotspot: yes;3DHotspot: yes	Missense_Mutation	18	48591919	48591919	doi： 10.1038/s41591-023-02324-5.
Colon Cancer (Sidra-LUMC AC-ICAM, Nat Med 2023)	SER-SILU-CC-P0305-PT-01	Colorectal Cancer	Colon Adenocarcinoma	R361H	Pathogenic	OncoKB: Likely Oncogenic, level NA, resistance NA;CIViC: NA;MyCancerGenome: present;CancerHotspot: yes;3DHotspot: yes	Missense_Mutation	18	48591919	48591919	doi： 10.1038/s41591-023-02324-5.
Colon Cancer (Sidra-LUMC AC-ICAM, Nat Med 2023)	SER-SILU-CC-P0310-PT-01	Colorectal Cancer	Colon Adenocarcinoma	R361H	Pathogenic	OncoKB: Likely Oncogenic, level NA, resistance NA;CIViC: NA;MyCancerGenome: present;CancerHotspot: yes;3DHotspot: yes	Missense_Mutation	18	48591919	48591919	doi： 10.1038/s41591-023-02324-5.
Colon Cancer (Sidra-LUMC AC-ICAM, Nat Med 2023)	SER-SILU-CC-P0310-PT-01	Colorectal Cancer	Colon Adenocarcinoma	R445*	Pathogenic	OncoKB: Likely Oncogenic, level NA, resistance NA;CIViC: NA;MyCancerGenome: not present;CancerHotspot: no;3DHotspot: no	Nonsense_Mutation	18	48603032	48603032	doi： 10.1038/s41591-023-02324-5.
Colon Cancer (Sidra-LUMC AC-ICAM, Nat Med 2023)	SER-SILU-CC-P0318-PT-01	Colorectal Cancer	Colon Adenocarcinoma	R361H	Pathogenic	OncoKB: Likely Oncogenic, level NA, resistance NA;CIViC: NA;MyCancerGenome: present;CancerHotspot: yes;3DHotspot: yes	Missense_Mutation	18	48591919	48591919	doi： 10.1038/s41591-023-02324-5.
Colon Cancer (Sidra-LUMC AC-ICAM, Nat Med 2023)	SER-SILU-CC-P0318-PT-01	Colorectal Cancer	Colon Adenocarcinoma	K110Nfs*12		OncoKB: Likely Oncogenic, level NA, resistance NA;CIViC: NA;MyCancerGenome: not present;CancerHotspot: no;3DHotspot: no	Frame_Shift_Del	18	48575133	48575133	doi： 10.1038/s41591-023-02324-5.
Colon Cancer (Sidra-LUMC AC-ICAM, Nat Med 2023)	SER-SILU-CC-P0321-PT-01	Colorectal Cancer	Colon Adenocarcinoma	L536*		OncoKB: Likely Oncogenic, level NA, resistance NA;CIViC: NA;MyCancerGenome: not present;CancerHotspot: no;3DHotspot: no	Frame_Shift_Del	18	48604783	48604783	doi： 10.1038/s41591-023-02324-5.
Colon Cancer (Sidra-LUMC AC-ICAM, Nat Med 2023)	SER-SILU-CC-P0326-PT-01	Colorectal Cancer	Colon Adenocarcinoma	R361H	Pathogenic	OncoKB: Likely Oncogenic, level NA, resistance NA;CIViC: NA;MyCancerGenome: present;CancerHotspot: yes;3DHotspot: yes	Missense_Mutation	18	48591919	48591919	doi： 10.1038/s41591-023-02324-5.
Colon Cancer (Sidra-LUMC AC-ICAM, Nat Med 2023)	SER-SILU-CC-P0364-PT-01	Colorectal Cancer	Colon Adenocarcinoma	E520*		OncoKB: Likely Oncogenic, level NA, resistance NA;CIViC: NA;MyCancerGenome: not present;CancerHotspot: no;3DHotspot: no	Nonsense_Mutation	18	48604736	48604736	doi： 10.1038/s41591-023-02324-5.
Colon Cancer (Sidra-LUMC AC-ICAM, Nat Med 2023)	SER-SILU-CC-P0370-PT-01	Colorectal Cancer	Colon Adenocarcinoma	G471D		OncoKB: Unknown, level NA, resistance NA;CIViC: NA;MyCancerGenome: not present;CancerHotspot: no;3DHotspot: no	Missense_Mutation	18	48603111	48603111	doi： 10.1038/s41591-023-02324-5.
Colon Cancer (Sidra-LUMC AC-ICAM, Nat Med 2023)	SER-SILU-CC-P0392-PT-01	Colorectal Cancer	Colon Adenocarcinoma	A118V	Uncertain_significance	OncoKB: Likely Oncogenic, level NA, resistance NA;CIViC: NA;MyCancerGenome: not present;CancerHotspot: yes;3DHotspot: yes	Missense_Mutation	18	48575159	48575159	doi： 10.1038/s41591-023-02324-5.
Colon Cancer (Sidra-LUMC AC-ICAM, Nat Med 2023)	SER-SILU-CC-P0406-PT-01	Colorectal Cancer	Colon Adenocarcinoma	R97H	Uncertain_significance	OncoKB: Unknown, level NA, resistance NA;CIViC: NA;MyCancerGenome: not present;CancerHotspot: no;3DHotspot: yes	Missense_Mutation	18	48575096	48575096	doi： 10.1038/s41591-023-02324-5.
Colon Cancer (Sidra-LUMC AC-ICAM, Nat Med 2023)	SER-SILU-CC-P0421-PT-01	Colorectal Cancer	Colon Adenocarcinoma	R361S	Likely_pathogenic	OncoKB: Likely Oncogenic, level NA, resistance NA;CIViC: NA;MyCancerGenome: present;CancerHotspot: yes;3DHotspot: yes	Missense_Mutation	18	48591918	48591918	doi： 10.1038/s41591-023-02324-5.
Colon Cancer (Sidra-LUMC AC-ICAM, Nat Med 2023)	SER-SILU-CC-P0440-PT-01	Colorectal Cancer	Colon Adenocarcinoma	R361H	Pathogenic	OncoKB: Likely Oncogenic, level NA, resistance NA;CIViC: NA;MyCancerGenome: present;CancerHotspot: yes;3DHotspot: yes	Missense_Mutation	18	48591919	48591919	doi： 10.1038/s41591-023-02324-5.
Colon Cancer (Sidra-LUMC AC-ICAM, Nat Med 2023)	SER-SILU-CC-P0442-PT-01	Colorectal Cancer	Colon Adenocarcinoma	G477V		OncoKB: Unknown, level NA, resistance NA;CIViC: NA;MyCancerGenome: not present;CancerHotspot: no;3DHotspot: no	Missense_Mutation	18	48603129	48603129	doi： 10.1038/s41591-023-02324-5.
Colon Cancer (Sidra-LUMC AC-ICAM, Nat Med 2023)	SER-SILU-CC-P0451-PT-01	Colorectal Cancer	Colon Adenocarcinoma	E538K	Uncertain_significance	OncoKB: Unknown, level NA, resistance NA;CIViC: NA;MyCancerGenome: not present;CancerHotspot: no;3DHotspot: no	Missense_Mutation	18	48604790	48604790	doi： 10.1038/s41591-023-02324-5.
Colorectal Adenocarcinoma (MSK, Nat Commun 2022)	P-0021194-T01-IM6	Colorectal Cancer	Colon Adenocarcinoma	R361H	Pathogenic	OncoKB: Likely Oncogenic, level NA, resistance NA;CIViC: NA;MyCancerGenome: present;CancerHotspot: yes;3DHotspot: yes	Missense_Mutation	18	48591919	48591919	doi： 10.1038/s41467-022-35592-9.
Colorectal Adenocarcinoma (MSK, Nat Commun 2022)	P-0029060-T01-IM6	Small Bowel Cancer	Small Bowel Cancer	R361H	Pathogenic	OncoKB: Likely Oncogenic, level NA, resistance NA;CIViC: NA;MyCancerGenome: present;CancerHotspot: yes;3DHotspot: yes	Missense_Mutation	18	48591919	48591919	doi： 10.1038/s41467-022-35592-9.
Colorectal Adenocarcinoma (MSK, Nat Commun 2022)	P-0030802-T01-IM6	Colorectal Cancer	Mucinous Adenocarcinoma of the Colon and Rectum	P356R		OncoKB: Likely Oncogenic, level NA, resistance NA;CIViC: NA;MyCancerGenome: not present;CancerHotspot: yes;3DHotspot: no	Missense_Mutation	18	48591904	48591904	doi： 10.1038/s41467-022-35592-9.
Colorectal Adenocarcinoma (MSK, Nat Commun 2022)	P-0030802-T01-IM6	Colorectal Cancer	Mucinous Adenocarcinoma of the Colon and Rectum	R531W	Uncertain_significance	OncoKB: Unknown, level NA, resistance NA;CIViC: NA;MyCancerGenome: not present;CancerHotspot: no;3DHotspot: no	Missense_Mutation	18	48604769	48604769	doi： 10.1038/s41467-022-35592-9.
Colorectal Adenocarcinoma (MSK, Nat Commun 2022)	P-0032010-T01-IM6	Colorectal Cancer	Signet Ring Cell Adenocarcinoma of the Colon and Rectum	R361H	Pathogenic	OncoKB: Likely Oncogenic, level NA, resistance NA;CIViC: NA;MyCancerGenome: present;CancerHotspot: yes;3DHotspot: yes	Missense_Mutation	18	48591919	48591919	doi： 10.1038/s41467-022-35592-9.
Colorectal Adenocarcinoma (MSK, Nat Commun 2022)	P-0033141-T01-IM6	Colorectal Cancer	Colon Adenocarcinoma	R361C	Pathogenic	OncoKB: Likely Oncogenic, level NA, resistance NA;CIViC: diagnosticCount: 0, predictiveCount: 0, prognosticCount: 0, predisposingCount: 1, oncogenicCount: 0, functionalCount: 2;MyCancerGenome: present;CancerHotspot: yes;3DHotspot: yes	Missense_Mutation	18	48591918	48591918	doi： 10.1038/s41467-022-35592-9.
Colorectal Adenocarcinoma (MSK, Nat Commun 2022)	P-0044779-T01-IM6	Colorectal Adenocarcinoma	Colorectal Adenocarcinoma	W524C		OncoKB: Likely Oncogenic, level NA, resistance NA;CIViC: NA;MyCancerGenome: not present;CancerHotspot: yes;3DHotspot: no	Missense_Mutation	18	48604750	48604750	doi： 10.1038/s41467-022-35592-9.
Colorectal Adenocarcinoma (MSK, Nat Commun 2022)	P-0045221-T01-IM6	Rectal Adenocarcinoma	Rectal Adenocarcinoma	L536R		OncoKB: Likely Oncogenic, level NA, resistance NA;CIViC: NA;MyCancerGenome: not present;CancerHotspot: yes;3DHotspot: no	Missense_Mutation	18	48604785	48604785	doi： 10.1038/s41467-022-35592-9.
Colorectal Adenocarcinoma (MSK, Nat Commun 2022)	P-0060922-T01-IM7	Colorectal Adenocarcinoma	Colorectal Adenocarcinoma	A118V	Uncertain_significance	OncoKB: Likely Oncogenic, level NA, resistance NA;CIViC: NA;MyCancerGenome: not present;CancerHotspot: yes;3DHotspot: yes	Missense_Mutation	18	48575159	48575159	doi： 10.1038/s41467-022-35592-9.
Colorectal Adenocarcinoma (MSK, Nat Commun 2022)	P-0061615-T01-IM7	Rectal Adenocarcinoma	Rectal Adenocarcinoma	K385_G386del		OncoKB: Unknown, level NA, resistance NA;CIViC: NA;MyCancerGenome: not present;CancerHotspot: no;3DHotspot: no	In_Frame_Del	18	48593398	48593403	doi： 10.1038/s41467-022-35592-9.
Colorectal Adenocarcinoma (MSK, Nat Commun 2022)	P-0062331-T01-IM7	Colorectal Adenocarcinoma	Colorectal Adenocarcinoma	C127S		OncoKB: Unknown, level NA, resistance NA;CIViC: NA;MyCancerGenome: not present;CancerHotspot: no;3DHotspot: yes	Missense_Mutation	18	48575186	48575186	doi： 10.1038/s41467-022-35592-9.
Colorectal Adenocarcinoma (MSK, Nat Commun 2022)	P-0063437-T02-IM7	Rectal Adenocarcinoma	Rectal Adenocarcinoma	R361C	Pathogenic	OncoKB: Likely Oncogenic, level NA, resistance NA;CIViC: diagnosticCount: 0, predictiveCount: 0, prognosticCount: 0, predisposingCount: 1, oncogenicCount: 0, functionalCount: 2;MyCancerGenome: present;CancerHotspot: yes;3DHotspot: yes	Missense_Mutation	18	48591918	48591918	doi： 10.1038/s41467-022-35592-9.
Colorectal Adenocarcinoma (MSK, Nat Commun 2022)	s_DK_cac_012_P1	Rectal Adenocarcinoma	Rectal Adenocarcinoma	H530_A532del		OncoKB: Unknown, level NA, resistance NA;CIViC: NA;MyCancerGenome: not present;CancerHotspot: no;3DHotspot: no	In_Frame_Del	18	48604766	48604774	doi： 10.1038/s41467-022-35592-9.
Colorectal Adenocarcinoma (MSK, Nat Commun 2022)	TRF011722	Small Bowel Cancer	Small Bowel Cancer	E538*	Likely_pathogenic	OncoKB: Likely Oncogenic, level NA, resistance NA;CIViC: NA;MyCancerGenome: not present;CancerHotspot: no;3DHotspot: no	Nonsense_Mutation	18	48604790	48604790	doi： 10.1038/s41467-022-35592-9.
Colorectal Adenocarcinoma (MSK, Nat Commun 2022)	TRF060129	Colorectal Cancer	Colon Adenocarcinoma	R361C	Pathogenic	OncoKB: Likely Oncogenic, level NA, resistance NA;CIViC: diagnosticCount: 0, predictiveCount: 0, prognosticCount: 0, predisposingCount: 1, oncogenicCount: 0, functionalCount: 2;MyCancerGenome: present;CancerHotspot: yes;3DHotspot: yes	Missense_Mutation	18	48591918	48591918	doi： 10.1038/s41467-022-35592-9.
Colorectal Adenocarcinoma (MSK, Nat Commun 2022)	TRF060130	Colorectal Cancer	Colon Adenocarcinoma	C363Y	Likely_pathogenic	OncoKB: Likely Oncogenic, level NA, resistance NA;CIViC: NA;MyCancerGenome: not present;CancerHotspot: yes;3DHotspot: yes	Missense_Mutation	18	48591925	48591925	doi： 10.1038/s41467-022-35592-9.
Colorectal Adenocarcinoma (MSK, Nat Commun 2022)	TRF060132	Colorectal Cancer	Colon Adenocarcinoma	W509*		OncoKB: Likely Oncogenic, level NA, resistance NA;CIViC: NA;MyCancerGenome: not present;CancerHotspot: no;3DHotspot: no	Nonsense_Mutation	18	48604704	48604704	doi： 10.1038/s41467-022-35592-9.
Colorectal Adenocarcinoma (MSK, Nat Commun 2022)	TRF117588	Rectal Adenocarcinoma	Rectal Adenocarcinoma	P356L	Uncertain_significance	OncoKB: Likely Oncogenic, level NA, resistance NA;CIViC: NA;MyCancerGenome: not present;CancerHotspot: yes;3DHotspot: no	Missense_Mutation	18	48591904	48591904	doi： 10.1038/s41467-022-35592-9.
Colorectal Adenocarcinoma (MSK, Nat Commun 2022)	TRF117589	Rectal Adenocarcinoma	Rectal Adenocarcinoma	R361H	Pathogenic	OncoKB: Likely Oncogenic, level NA, resistance NA;CIViC: NA;MyCancerGenome: present;CancerHotspot: yes;3DHotspot: yes	Missense_Mutation	18	48591919	48591919	doi： 10.1038/s41467-022-35592-9.
Colorectal Adenocarcinoma (TCGA, Firehose Legacy)	TCGA-A6-2676-01	Colorectal Cancer	Colon Adenocarcinoma	R361H	Pathogenic	OncoKB: Likely Oncogenic, level NA, resistance NA;CIViC: NA;MyCancerGenome: present;CancerHotspot: yes;3DHotspot: yes	Missense_Mutation	18	48591919	48591919	GDAC Firehose
Colorectal Adenocarcinoma (TCGA, Firehose Legacy)	TCGA-AA-3520-01	Colorectal Cancer	Colon Adenocarcinoma	R97H	Uncertain_significance	OncoKB: Unknown, level NA, resistance NA;CIViC: NA;MyCancerGenome: not present;CancerHotspot: no;3DHotspot: yes	Missense_Mutation	18	48575096	48575096	GDAC Firehose
Colorectal Adenocarcinoma (TCGA, Firehose Legacy)	TCGA-AA-3555-01	Colorectal Cancer	Mucinous Adenocarcinoma of the Colon and Rectum	E33*		OncoKB: Likely Oncogenic, level NA, resistance NA;CIViC: NA;MyCancerGenome: not present;CancerHotspot: no;3DHotspot: no	Nonsense_Mutation	18	48573513	48573513	GDAC Firehose
Colorectal Adenocarcinoma (TCGA, Firehose Legacy)	TCGA-AA-3555-01	Colorectal Cancer	Mucinous Adenocarcinoma of the Colon and Rectum	E520*		OncoKB: Likely Oncogenic, level NA, resistance NA;CIViC: NA;MyCancerGenome: not present;CancerHotspot: no;3DHotspot: no	Nonsense_Mutation	18	48604736	48604736	GDAC Firehose
Colorectal Adenocarcinoma (TCGA, Firehose Legacy)	TCGA-AA-3558-01	Colorectal Cancer	Colon Adenocarcinoma	R361H	Pathogenic	OncoKB: Likely Oncogenic, level NA, resistance NA;CIViC: NA;MyCancerGenome: present;CancerHotspot: yes;3DHotspot: yes	Missense_Mutation	18	48591919	48591919	GDAC Firehose
Colorectal Adenocarcinoma (TCGA, Firehose Legacy)	TCGA-AA-3692-01	Colorectal Cancer	Mucinous Adenocarcinoma of the Colon and Rectum	R361H	Pathogenic	OncoKB: Likely Oncogenic, level NA, resistance NA;CIViC: NA;MyCancerGenome: present;CancerHotspot: yes;3DHotspot: yes	Missense_Mutation	18	48591919	48591919	GDAC Firehose
Colorectal Adenocarcinoma (TCGA, Firehose Legacy)	TCGA-AA-3811-01	Colorectal Cancer	Colon Adenocarcinoma	V136A	Uncertain_significance	OncoKB: Unknown, level NA, resistance NA;CIViC: NA;MyCancerGenome: not present;CancerHotspot: no;3DHotspot: no	Missense_Mutation	18	48575213	48575213	GDAC Firehose
Colorectal Adenocarcinoma (TCGA, Firehose Legacy)	TCGA-AA-A00K-01	Colorectal Cancer	Colon Adenocarcinoma	R361H	Pathogenic	OncoKB: Likely Oncogenic, level NA, resistance NA;CIViC: NA;MyCancerGenome: present;CancerHotspot: yes;3DHotspot: yes	Missense_Mutation	18	48591919	48591919	GDAC Firehose
Colorectal Adenocarcinoma (TCGA, Firehose Legacy)	TCGA-AA-A01D-01	Colorectal Cancer	Mucinous Adenocarcinoma of the Colon and Rectum	Y513*		OncoKB: Likely Oncogenic, level NA, resistance NA;CIViC: NA;MyCancerGenome: not present;CancerHotspot: no;3DHotspot: no	Nonsense_Mutation	18	48604717	48604717	GDAC Firehose
Colorectal Adenocarcinoma (TCGA, Firehose Legacy)	TCGA-AA-A02O-01	Colorectal Cancer	Colon Adenocarcinoma	C324R	Uncertain_significance	OncoKB: Likely Oncogenic, level NA, resistance NA;CIViC: NA;MyCancerGenome: not present;CancerHotspot: no;3DHotspot: no	Missense_Mutation	18	48591807	48591807	GDAC Firehose
Colorectal Adenocarcinoma (TCGA, Firehose Legacy)	TCGA-AG-3887-01	Colorectal Cancer	Rectal Adenocarcinoma	D537V	Uncertain_significance	OncoKB: Likely Oncogenic, level NA, resistance NA;CIViC: NA;MyCancerGenome: present;CancerHotspot: yes;3DHotspot: no	Missense_Mutation	18	48604788	48604788	GDAC Firehose
Colorectal Adenocarcinoma (TCGA, Firehose Legacy)	TCGA-AG-4005-01	Colorectal Cancer	Rectal Adenocarcinoma	R361H	Pathogenic	OncoKB: Likely Oncogenic, level NA, resistance NA;CIViC: NA;MyCancerGenome: present;CancerHotspot: yes;3DHotspot: yes	Missense_Mutation	18	48591919	48591919	GDAC Firehose
Colorectal Adenocarcinoma (TCGA, Firehose Legacy)	TCGA-AG-A011-01	Colorectal Cancer	Rectal Adenocarcinoma	R361H	Pathogenic	OncoKB: Likely Oncogenic, level NA, resistance NA;CIViC: NA;MyCancerGenome: present;CancerHotspot: yes;3DHotspot: yes	Missense_Mutation	18	48591919	48591919	GDAC Firehose
Colorectal Adenocarcinoma (TCGA, Nature 2012)	TCGA-A6-2678-01	Colorectal Cancer	Colon Adenocarcinoma	D355G		OncoKB: Likely Oncogenic, level NA, resistance NA;CIViC: NA;MyCancerGenome: present;CancerHotspot: yes;3DHotspot: yes	Missense_Mutation	18	48591901	48591901	doi： 10.1038/nature11252.
Colorectal Adenocarcinoma (TCGA, Nature 2012)	TCGA-AA-3522-01	Colorectal Cancer	Colon Adenocarcinoma	S357P	Uncertain_significance	OncoKB: Unknown, level NA, resistance NA;CIViC: NA;MyCancerGenome: not present;CancerHotspot: no;3DHotspot: no	Missense_Mutation	18	48591906	48591906	doi： 10.1038/nature11252.
Colorectal Adenocarcinoma (TCGA, Nature 2012)	TCGA-AA-3530-01	Colorectal Cancer	Colon Adenocarcinoma	G510R		OncoKB: Likely Oncogenic, level NA, resistance NA;CIViC: NA;MyCancerGenome: not present;CancerHotspot: yes;3DHotspot: no	Missense_Mutation	18	48604706	48604706	doi： 10.1038/nature11252.
Colorectal Adenocarcinoma (TCGA, Nature 2012)	TCGA-AA-3666-01	Colorectal Cancer	Colon Adenocarcinoma	V437D		OncoKB: Unknown, level NA, resistance NA;CIViC: NA;MyCancerGenome: not present;CancerHotspot: no;3DHotspot: no	Missense_Mutation	18	48603009	48603009	doi： 10.1038/nature11252.
Colorectal Adenocarcinoma (TCGA, Nature 2012)	TCGA-AA-3811-01	Colorectal Cancer	Colon Adenocarcinoma	R361H	Pathogenic	OncoKB: Likely Oncogenic, level NA, resistance NA;CIViC: NA;MyCancerGenome: present;CancerHotspot: yes;3DHotspot: yes	Missense_Mutation	18	48591919	48591919	doi： 10.1038/nature11252.
Colorectal Adenocarcinoma (TCGA, Nature 2012)	TCGA-AA-3821-01	Colorectal Cancer	Colorectal Adenocarcinoma	R496H	Uncertain_significance	OncoKB: Likely Oncogenic, level NA, resistance NA;CIViC: diagnosticCount: 0, predictiveCount: 0, prognosticCount: 0, predisposingCount: 0, oncogenicCount: 0, functionalCount: 1;MyCancerGenome: not present;CancerHotspot: no;3DHotspot: no	Missense_Mutation	18	48604665	48604665	doi： 10.1038/nature11252.
Colorectal Adenocarcinoma (TCGA, Nature 2012)	TCGA-AA-3821-01	Colorectal Cancer	Colorectal Adenocarcinoma	S32*		OncoKB: Likely Oncogenic, level NA, resistance NA;CIViC: NA;MyCancerGenome: not present;CancerHotspot: no;3DHotspot: no	Frame_Shift_Del	18	48573505	48573506	doi： 10.1038/nature11252.
Colorectal Adenocarcinoma (TCGA, Nature 2012)	TCGA-AA-3845-01	Colorectal Cancer	Colorectal Adenocarcinoma	L533R		OncoKB: Unknown, level NA, resistance NA;CIViC: NA;MyCancerGenome: not present;CancerHotspot: no;3DHotspot: no	Missense_Mutation	18	48604776	48604776	doi： 10.1038/nature11252.
Colorectal Adenocarcinoma (TCGA, Nature 2012)	TCGA-AA-3864-01	Colorectal Cancer	Colon Adenocarcinoma	A327V		OncoKB: Unknown, level NA, resistance NA;CIViC: NA;MyCancerGenome: not present;CancerHotspot: no;3DHotspot: no	Missense_Mutation	18	48591817	48591817	doi： 10.1038/nature11252.
Colorectal Adenocarcinoma (TCGA, Nature 2012)	TCGA-AA-3973-01	Colorectal Cancer	Colon Adenocarcinoma	A36_K45del		OncoKB: Unknown, level NA, resistance NA;CIViC: NA;MyCancerGenome: not present;CancerHotspot: no;3DHotspot: no	In_Frame_Del	18	48573522	48573551	doi： 10.1038/nature11252.
Colorectal Adenocarcinoma (TCGA, Nature 2012)	TCGA-AA-3984-01	Colorectal Cancer	Colon Adenocarcinoma	E134K		OncoKB: Unknown, level NA, resistance NA;CIViC: NA;MyCancerGenome: not present;CancerHotspot: no;3DHotspot: yes	Missense_Mutation	18	48575206	48575206	doi： 10.1038/nature11252.
Colorectal Adenocarcinoma (TCGA, Nature 2012)	TCGA-AA-3984-01	Colorectal Cancer	Colon Adenocarcinoma	G65E		OncoKB: Unknown, level NA, resistance NA;CIViC: NA;MyCancerGenome: not present;CancerHotspot: no;3DHotspot: no	Missense_Mutation	18	48573610	48573610	doi： 10.1038/nature11252.
Colorectal Adenocarcinoma (TCGA, Nature 2012)	TCGA-AG-3901-01	Colorectal Cancer	Colorectal Adenocarcinoma	P356L	Uncertain_significance	OncoKB: Likely Oncogenic, level NA, resistance NA;CIViC: NA;MyCancerGenome: not present;CancerHotspot: yes;3DHotspot: no	Missense_Mutation	18	48591904	48591904	doi： 10.1038/nature11252.
Colorectal Adenocarcinoma (TCGA, Nature 2012)	TCGA-AG-A008-01	Colorectal Cancer	Colorectal Adenocarcinoma	D537Y	Pathogenic	OncoKB: Oncogenic, level NA, resistance NA;CIViC: diagnosticCount: 0, predictiveCount: 0, prognosticCount: 0, predisposingCount: 0, oncogenicCount: 0, functionalCount: 1;MyCancerGenome: present;CancerHotspot: yes;3DHotspot: no	Missense_Mutation	18	48604787	48604787	doi： 10.1038/nature11252.
Colorectal Adenocarcinoma (TCGA, Nature 2012)	TCGA-AG-A016-01	Colorectal Cancer	Rectal Adenocarcinoma	L57V		OncoKB: Unknown, level NA, resistance NA;CIViC: NA;MyCancerGenome: not present;CancerHotspot: no;3DHotspot: yes	Missense_Mutation	18	48573585	48573585	doi： 10.1038/nature11252.
Colorectal Adenocarcinoma (TCGA, Nature 2012)	TCGA-AG-A020-01	Colorectal Cancer	Colorectal Adenocarcinoma	D537G	Uncertain_significance	OncoKB: Likely Oncogenic, level NA, resistance NA;CIViC: NA;MyCancerGenome: present;CancerHotspot: yes;3DHotspot: no	Missense_Mutation	18	48604788	48604788	doi： 10.1038/nature11252.
Colorectal Adenocarcinoma (TCGA, Nature 2012)	TCGA-AG-A02X-01	Colorectal Cancer	Rectal Adenocarcinoma	L104F		OncoKB: Unknown, level NA, resistance NA;CIViC: NA;MyCancerGenome: not present;CancerHotspot: no;3DHotspot: no	Missense_Mutation	18	48575116	48575116	doi： 10.1038/nature11252.
Colorectal Adenocarcinoma (TCGA, PanCancer Atlas)	TCGA-A6-3809-01	Colorectal Cancer	Mucinous Adenocarcinoma of the Colon and Rectum	P550T		OncoKB: Unknown, level NA, resistance NA;CIViC: NA;MyCancerGenome: not present;CancerHotspot: no;3DHotspot: no	Missense_Mutation	18	48604826	48604826	Pan-Cancer Atlas (PanCanAtlas)
Colorectal Adenocarcinoma (TCGA, PanCancer Atlas)	TCGA-A6-5664-01	Colorectal Cancer	Colon Adenocarcinoma	K340E	Uncertain_significance	OncoKB: Unknown, level NA, resistance NA;CIViC: NA;MyCancerGenome: not present;CancerHotspot: no;3DHotspot: no	Missense_Mutation	18	48591855	48591855	Pan-Cancer Atlas (PanCanAtlas)
Colorectal Adenocarcinoma (TCGA, PanCancer Atlas)	TCGA-A6-A565-01	Colorectal Cancer	Mucinous Adenocarcinoma of the Colon and Rectum	R361H	Pathogenic	OncoKB: Likely Oncogenic, level NA, resistance NA;CIViC: NA;MyCancerGenome: present;CancerHotspot: yes;3DHotspot: yes	Missense_Mutation	18	48591919	48591919	Pan-Cancer Atlas (PanCanAtlas)
Colorectal Adenocarcinoma (TCGA, PanCancer Atlas)	TCGA-A6-A565-01	Colorectal Cancer	Mucinous Adenocarcinoma of the Colon and Rectum	A118V	Uncertain_significance	OncoKB: Likely Oncogenic, level NA, resistance NA;CIViC: NA;MyCancerGenome: not present;CancerHotspot: yes;3DHotspot: yes	Missense_Mutation	18	48575159	48575159	Pan-Cancer Atlas (PanCanAtlas)
Colorectal Adenocarcinoma (TCGA, PanCancer Atlas)	TCGA-AA-3496-01	Colorectal Cancer	Colon Adenocarcinoma	S232Qfs*3	Pathogenic	OncoKB: Likely Oncogenic, level NA, resistance NA;CIViC: NA;MyCancerGenome: not present;CancerHotspot: no;3DHotspot: no	Frame_Shift_Ins	18	48584513	48584514	Pan-Cancer Atlas (PanCanAtlas)
Colorectal Adenocarcinoma (TCGA, PanCancer Atlas)	TCGA-AA-3842-01	Colorectal Cancer	Colon Adenocarcinoma	C363W		OncoKB: Likely Oncogenic, level NA, resistance NA;CIViC: NA;MyCancerGenome: not present;CancerHotspot: yes;3DHotspot: yes	Missense_Mutation	18	48591926	48591926	Pan-Cancer Atlas (PanCanAtlas)
Colorectal Adenocarcinoma (TCGA, PanCancer Atlas)	TCGA-AA-3845-01	Colorectal Cancer	Colon Adenocarcinoma	S32*		OncoKB: Likely Oncogenic, level NA, resistance NA;CIViC: NA;MyCancerGenome: not present;CancerHotspot: no;3DHotspot: no	Frame_Shift_Del	18	48573505	48573506	Pan-Cancer Atlas (PanCanAtlas)
Colorectal Adenocarcinoma (TCGA, PanCancer Atlas)	TCGA-AA-3984-01	Colorectal Cancer	Colon Adenocarcinoma	A39T	Uncertain_significance	OncoKB: Unknown, level NA, resistance NA;CIViC: NA;MyCancerGenome: not present;CancerHotspot: no;3DHotspot: yes	Missense_Mutation	18	48573531	48573531	Pan-Cancer Atlas (PanCanAtlas)
Colorectal Adenocarcinoma (TCGA, PanCancer Atlas)	TCGA-AA-A02E-01	Colorectal Cancer	Colon Adenocarcinoma	G419A		OncoKB: Likely Oncogenic, level NA, resistance NA;CIViC: NA;MyCancerGenome: not present;CancerHotspot: yes;3DHotspot: no	Missense_Mutation	18	48593505	48593505	Pan-Cancer Atlas (PanCanAtlas)
Colorectal Adenocarcinoma (TCGA, PanCancer Atlas)	TCGA-AD-6899-01	Colorectal Cancer	Mucinous Adenocarcinoma of the Colon and Rectum	R361H	Pathogenic	OncoKB: Likely Oncogenic, level NA, resistance NA;CIViC: NA;MyCancerGenome: present;CancerHotspot: yes;3DHotspot: yes	Missense_Mutation	18	48591919	48591919	Pan-Cancer Atlas (PanCanAtlas)
Colorectal Adenocarcinoma (TCGA, PanCancer Atlas)	TCGA-AD-6899-01	Colorectal Cancer	Mucinous Adenocarcinoma of the Colon and Rectum	D537H		OncoKB: Likely Oncogenic, level NA, resistance NA;CIViC: NA;MyCancerGenome: present;CancerHotspot: yes;3DHotspot: no	Missense_Mutation	18	48604787	48604787	Pan-Cancer Atlas (PanCanAtlas)
Colorectal Adenocarcinoma (TCGA, PanCancer Atlas)	TCGA-AF-2690-01	Colorectal Cancer	Rectal Adenocarcinoma	D537H		OncoKB: Likely Oncogenic, level NA, resistance NA;CIViC: NA;MyCancerGenome: present;CancerHotspot: yes;3DHotspot: no	Missense_Mutation	18	48604787	48604787	Pan-Cancer Atlas (PanCanAtlas)
Colorectal Adenocarcinoma (TCGA, PanCancer Atlas)	TCGA-AF-6136-01	Colorectal Cancer	Rectal Adenocarcinoma	L47Q		OncoKB: Unknown, level NA, resistance NA;CIViC: NA;MyCancerGenome: not present;CancerHotspot: no;3DHotspot: no	Missense_Mutation	18	48573556	48573556	Pan-Cancer Atlas (PanCanAtlas)
Colorectal Adenocarcinoma (TCGA, PanCancer Atlas)	TCGA-AF-6672-01	Colorectal Cancer	Rectal Adenocarcinoma	F408L		OncoKB: Unknown, level NA, resistance NA;CIViC: NA;MyCancerGenome: not present;CancerHotspot: no;3DHotspot: no	Missense_Mutation	18	48593473	48593473	Pan-Cancer Atlas (PanCanAtlas)
Colorectal Adenocarcinoma (TCGA, PanCancer Atlas)	TCGA-AG-3885-01	Colorectal Cancer	Rectal Adenocarcinoma	S325Yfs*5		OncoKB: Likely Oncogenic, level NA, resistance NA;CIViC: NA;MyCancerGenome: not present;CancerHotspot: no;3DHotspot: no	Frame_Shift_Del	18	48591811	48591812	Pan-Cancer Atlas (PanCanAtlas)
Colorectal Adenocarcinoma (TCGA, PanCancer Atlas)	TCGA-AH-6903-01	Colorectal Cancer	Rectal Adenocarcinoma	R361C	Pathogenic	OncoKB: Likely Oncogenic, level NA, resistance NA;CIViC: diagnosticCount: 0, predictiveCount: 0, prognosticCount: 0, predisposingCount: 1, oncogenicCount: 0, functionalCount: 2;MyCancerGenome: present;CancerHotspot: yes;3DHotspot: yes	Missense_Mutation	18	48591918	48591918	Pan-Cancer Atlas (PanCanAtlas)
Colorectal Adenocarcinoma (TCGA, PanCancer Atlas)	TCGA-AY-6386-01	Colorectal Cancer	Colon Adenocarcinoma	Q116*		OncoKB: Likely Oncogenic, level NA, resistance NA;CIViC: NA;MyCancerGenome: not present;CancerHotspot: no;3DHotspot: no	Nonsense_Mutation	18	48575152	48575152	Pan-Cancer Atlas (PanCanAtlas)
Colorectal Adenocarcinoma (TCGA, PanCancer Atlas)	TCGA-AZ-4614-01	Colorectal Cancer	Colon Adenocarcinoma	D52Rfs*2	Pathogenic	OncoKB: Likely Oncogenic, level NA, resistance NA;CIViC: NA;MyCancerGenome: not present;CancerHotspot: no;3DHotspot: no	Frame_Shift_Ins	18	48573563	48573564	Pan-Cancer Atlas (PanCanAtlas)
Colorectal Adenocarcinoma (TCGA, PanCancer Atlas)	TCGA-AZ-4616-01	Colorectal Cancer	Colon Adenocarcinoma	G419V		OncoKB: Likely Oncogenic, level NA, resistance NA;CIViC: diagnosticCount: 0, predictiveCount: 0, prognosticCount: 0, predisposingCount: 0, oncogenicCount: 0, functionalCount: 1;MyCancerGenome: not present;CancerHotspot: yes;3DHotspot: no	Missense_Mutation	18	48593505	48593505	Pan-Cancer Atlas (PanCanAtlas)
Colorectal Adenocarcinoma (TCGA, PanCancer Atlas)	TCGA-AZ-6598-01	Colorectal Cancer	Colon Adenocarcinoma	Y117H		OncoKB: Unknown, level NA, resistance NA;CIViC: NA;MyCancerGenome: not present;CancerHotspot: no;3DHotspot: no	Missense_Mutation	18	48575155	48575155	Pan-Cancer Atlas (PanCanAtlas)
Colorectal Adenocarcinoma (TCGA, PanCancer Atlas)	TCGA-CA-5796-01	Colorectal Cancer	Mucinous Adenocarcinoma of the Colon and Rectum	D351G	Uncertain_significance	OncoKB: Likely Oncogenic, level NA, resistance NA;CIViC: NA;MyCancerGenome: present;CancerHotspot: yes;3DHotspot: yes	Missense_Mutation	18	48591889	48591889	Pan-Cancer Atlas (PanCanAtlas)
Colorectal Adenocarcinoma (TCGA, PanCancer Atlas)	TCGA-CA-5796-01	Colorectal Cancer	Mucinous Adenocarcinoma of the Colon and Rectum	Q516*	Likely_pathogenic	OncoKB: Likely Oncogenic, level NA, resistance NA;CIViC: NA;MyCancerGenome: not present;CancerHotspot: no;3DHotspot: no	Nonsense_Mutation	18	48604724	48604724	Pan-Cancer Atlas (PanCanAtlas)
Colorectal Adenocarcinoma (TCGA, PanCancer Atlas)	TCGA-CA-6717-01	Colorectal Cancer	Mucinous Adenocarcinoma of the Colon and Rectum	R361H	Pathogenic	OncoKB: Likely Oncogenic, level NA, resistance NA;CIViC: NA;MyCancerGenome: present;CancerHotspot: yes;3DHotspot: yes	Missense_Mutation	18	48591919	48591919	Pan-Cancer Atlas (PanCanAtlas)
Colorectal Adenocarcinoma (TCGA, PanCancer Atlas)	TCGA-CA-6718-01	Colorectal Cancer	Colon Adenocarcinoma	G89*		OncoKB: Likely Oncogenic, level NA, resistance NA;CIViC: NA;MyCancerGenome: not present;CancerHotspot: no;3DHotspot: no	Nonsense_Mutation	18	48575071	48575071	Pan-Cancer Atlas (PanCanAtlas)
Colorectal Adenocarcinoma (TCGA, PanCancer Atlas)	TCGA-CA-6718-01	Colorectal Cancer	Colon Adenocarcinoma	Q534P		OncoKB: Unknown, level NA, resistance NA;CIViC: NA;MyCancerGenome: not present;CancerHotspot: no;3DHotspot: no	Missense_Mutation	18	48604779	48604779	Pan-Cancer Atlas (PanCanAtlas)
Colorectal Adenocarcinoma (TCGA, PanCancer Atlas)	TCGA-CK-4950-01	Colorectal Cancer	Mucinous Adenocarcinoma of the Colon and Rectum	W302*	Pathogenic	OncoKB: Likely Oncogenic, level NA, resistance NA;CIViC: NA;MyCancerGenome: not present;CancerHotspot: no;3DHotspot: no	Nonsense_Mutation	18	48586237	48586237	Pan-Cancer Atlas (PanCanAtlas)
Colorectal Adenocarcinoma (TCGA, PanCancer Atlas)	TCGA-CK-4950-01	Colorectal Cancer	Mucinous Adenocarcinoma of the Colon and Rectum	A532D	Uncertain_significance	OncoKB: Likely Oncogenic, level NA, resistance NA;CIViC: NA;MyCancerGenome: not present;CancerHotspot: no;3DHotspot: no	Missense_Mutation	18	48604773	48604773	Pan-Cancer Atlas (PanCanAtlas)
Colorectal Adenocarcinoma (TCGA, PanCancer Atlas)	TCGA-CK-5916-01	Colorectal Cancer	Colon Adenocarcinoma	C115Y	Uncertain_significance	OncoKB: Unknown, level NA, resistance NA;CIViC: NA;MyCancerGenome: not present;CancerHotspot: no;3DHotspot: yes	Missense_Mutation	18	48575150	48575150	Pan-Cancer Atlas (PanCanAtlas)
Colorectal Adenocarcinoma (TCGA, PanCancer Atlas)	TCGA-CM-5868-01	Colorectal Cancer	Colon Adenocarcinoma	K436N		OncoKB: Unknown, level NA, resistance NA;CIViC: NA;MyCancerGenome: not present;CancerHotspot: no;3DHotspot: no	Missense_Mutation	18	48593557	48593557	Pan-Cancer Atlas (PanCanAtlas)
Colorectal Adenocarcinoma (TCGA, PanCancer Atlas)	TCGA-CM-6165-01	Colorectal Cancer	Colon Adenocarcinoma	E330Q		OncoKB: Likely Oncogenic, level NA, resistance NA;CIViC: NA;MyCancerGenome: present;CancerHotspot: yes;3DHotspot: no	Missense_Mutation	18	48591825	48591825	Pan-Cancer Atlas (PanCanAtlas)
Colorectal Adenocarcinoma (TCGA, PanCancer Atlas)	TCGA-CM-6170-01	Colorectal Cancer	Colon Adenocarcinoma	G365D		OncoKB: Unknown, level NA, resistance NA;CIViC: NA;MyCancerGenome: not present;CancerHotspot: no;3DHotspot: yes	Missense_Mutation	18	48591931	48591931	Pan-Cancer Atlas (PanCanAtlas)
Colorectal Adenocarcinoma (TCGA, PanCancer Atlas)	TCGA-CM-6171-01	Colorectal Cancer	Colon Adenocarcinoma	R361H	Pathogenic	OncoKB: Likely Oncogenic, level NA, resistance NA;CIViC: NA;MyCancerGenome: present;CancerHotspot: yes;3DHotspot: yes	Missense_Mutation	18	48591919	48591919	Pan-Cancer Atlas (PanCanAtlas)
Colorectal Adenocarcinoma (TCGA, PanCancer Atlas)	TCGA-CM-6171-01	Colorectal Cancer	Colon Adenocarcinoma	S32*		OncoKB: Likely Oncogenic, level NA, resistance NA;CIViC: NA;MyCancerGenome: not present;CancerHotspot: no;3DHotspot: no	Frame_Shift_Del	18	48573505	48573506	Pan-Cancer Atlas (PanCanAtlas)
Colorectal Adenocarcinoma (TCGA, PanCancer Atlas)	TCGA-CM-6680-01	Colorectal Cancer	Colon Adenocarcinoma	D355G		OncoKB: Likely Oncogenic, level NA, resistance NA;CIViC: NA;MyCancerGenome: present;CancerHotspot: yes;3DHotspot: yes	Missense_Mutation	18	48591901	48591901	Pan-Cancer Atlas (PanCanAtlas)
Colorectal Adenocarcinoma (TCGA, PanCancer Atlas)	TCGA-D5-5538-01	Colorectal Cancer	Colon Adenocarcinoma	R361H	Pathogenic	OncoKB: Likely Oncogenic, level NA, resistance NA;CIViC: NA;MyCancerGenome: present;CancerHotspot: yes;3DHotspot: yes	Missense_Mutation	18	48591919	48591919	Pan-Cancer Atlas (PanCanAtlas)
Colorectal Adenocarcinoma (TCGA, PanCancer Atlas)	TCGA-D5-6532-01	Colorectal Cancer	Colon Adenocarcinoma	R361C	Pathogenic	OncoKB: Likely Oncogenic, level NA, resistance NA;CIViC: diagnosticCount: 0, predictiveCount: 0, prognosticCount: 0, predisposingCount: 1, oncogenicCount: 0, functionalCount: 2;MyCancerGenome: present;CancerHotspot: yes;3DHotspot: yes	Missense_Mutation	18	48591918	48591918	Pan-Cancer Atlas (PanCanAtlas)
Colorectal Adenocarcinoma (TCGA, PanCancer Atlas)	TCGA-D5-6920-01	Colorectal Cancer	Colon Adenocarcinoma	A532Pfs*5		OncoKB: Likely Oncogenic, level NA, resistance NA;CIViC: NA;MyCancerGenome: not present;CancerHotspot: no;3DHotspot: no	Frame_Shift_Del	18	48604770	48604770	Pan-Cancer Atlas (PanCanAtlas)
Colorectal Adenocarcinoma (TCGA, PanCancer Atlas)	TCGA-D5-7000-01	Colorectal Cancer	Mucinous Adenocarcinoma of the Colon and Rectum	R361H	Pathogenic	OncoKB: Likely Oncogenic, level NA, resistance NA;CIViC: NA;MyCancerGenome: present;CancerHotspot: yes;3DHotspot: yes	Missense_Mutation	18	48591919	48591919	Pan-Cancer Atlas (PanCanAtlas)
Colorectal Adenocarcinoma (TCGA, PanCancer Atlas)	TCGA-DC-6681-01	Colorectal Cancer	Rectal Adenocarcinoma	G386D	Pathogenic/Likely_pathogenic	OncoKB: Likely Oncogenic, level NA, resistance NA;CIViC: diagnosticCount: 0, predictiveCount: 0, prognosticCount: 0, predisposingCount: 0, oncogenicCount: 0, functionalCount: 1;MyCancerGenome: not present;CancerHotspot: yes;3DHotspot: yes	Missense_Mutation	18	48593406	48593406	Pan-Cancer Atlas (PanCanAtlas)
Colorectal Adenocarcinoma (TCGA, PanCancer Atlas)	TCGA-DM-A1D4-01	Colorectal Cancer	Colon Adenocarcinoma	X152_splice		OncoKB: Likely Oncogenic, level NA, resistance NA;CIViC: NA;MyCancerGenome: not present;CancerHotspot: no;3DHotspot: no	Splice_Region	18	48581148	48581149	Pan-Cancer Atlas (PanCanAtlas)
Colorectal Adenocarcinoma (TCGA, PanCancer Atlas)	TCGA-DM-A1D8-01	Colorectal Cancer	Colon Adenocarcinoma	G365R	Uncertain_significance	OncoKB: Unknown, level NA, resistance NA;CIViC: NA;MyCancerGenome: not present;CancerHotspot: no;3DHotspot: yes	Missense_Mutation	18	48591930	48591930	Pan-Cancer Atlas (PanCanAtlas)
Colorectal Adenocarcinoma (TCGA, PanCancer Atlas)	TCGA-DM-A1D9-01	Colorectal Cancer	Colon Adenocarcinoma	X483_splice	not_provided	OncoKB: Likely Oncogenic, level NA, resistance NA;CIViC: NA;MyCancerGenome: not present;CancerHotspot: no;3DHotspot: no	Splice_Site	18	48603147	48603147	Pan-Cancer Atlas (PanCanAtlas)
Colorectal Adenocarcinoma (TCGA, PanCancer Atlas)	TCGA-DM-A285-01	Colorectal Cancer	Mucinous Adenocarcinoma of the Colon and Rectum	G352R	Pathogenic/Likely_pathogenic	OncoKB: Likely Oncogenic, level NA, resistance NA;CIViC: NA;MyCancerGenome: not present;CancerHotspot: yes;3DHotspot: yes	Missense_Mutation	18	48591891	48591891	Pan-Cancer Atlas (PanCanAtlas)
Colorectal Adenocarcinoma (TCGA, PanCancer Atlas)	TCGA-DM-A28H-01	Colorectal Cancer	Colon Adenocarcinoma	D537H		OncoKB: Likely Oncogenic, level NA, resistance NA;CIViC: NA;MyCancerGenome: present;CancerHotspot: yes;3DHotspot: no	Missense_Mutation	18	48604787	48604787	Pan-Cancer Atlas (PanCanAtlas)
Colorectal Adenocarcinoma (TCGA, PanCancer Atlas)	TCGA-DM-A28K-01	Colorectal Cancer	Mucinous Adenocarcinoma of the Colon and Rectum	S232Qfs*3	Pathogenic	OncoKB: Likely Oncogenic, level NA, resistance NA;CIViC: NA;MyCancerGenome: not present;CancerHotspot: no;3DHotspot: no	Frame_Shift_Ins	18	48584513	48584514	Pan-Cancer Atlas (PanCanAtlas)
Colorectal Adenocarcinoma (TCGA, PanCancer Atlas)	TCGA-DY-A1DD-01	Colorectal Cancer	Rectal Adenocarcinoma	K428M		OncoKB: Likely Oncogenic, level NA, resistance NA;CIViC: NA;MyCancerGenome: not present;CancerHotspot: no;3DHotspot: no	Missense_Mutation	18	48593532	48593532	Pan-Cancer Atlas (PanCanAtlas)
Colorectal Adenocarcinoma (TCGA, PanCancer Atlas)	TCGA-DY-A1DF-01	Colorectal Cancer	Rectal Adenocarcinoma	R361H	Pathogenic	OncoKB: Likely Oncogenic, level NA, resistance NA;CIViC: NA;MyCancerGenome: present;CancerHotspot: yes;3DHotspot: yes	Missense_Mutation	18	48591919	48591919	Pan-Cancer Atlas (PanCanAtlas)
Colorectal Adenocarcinoma (TCGA, PanCancer Atlas)	TCGA-EI-6508-01	Colorectal Cancer	Rectal Adenocarcinoma	L495R		OncoKB: Unknown, level NA, resistance NA;CIViC: NA;MyCancerGenome: not present;CancerHotspot: no;3DHotspot: no	Missense_Mutation	18	48604662	48604662	Pan-Cancer Atlas (PanCanAtlas)
Colorectal Adenocarcinoma (TCGA, PanCancer Atlas)	TCGA-EI-6882-01	Colorectal Cancer	Rectal Adenocarcinoma	N285Tfs*51		OncoKB: Likely Oncogenic, level NA, resistance NA;CIViC: NA;MyCancerGenome: not present;CancerHotspot: no;3DHotspot: no	Frame_Shift_Del	18	48584773	48584773	Pan-Cancer Atlas (PanCanAtlas)
Colorectal Adenocarcinoma (TCGA, PanCancer Atlas)	TCGA-EI-6917-01	Colorectal Cancer	Rectal Adenocarcinoma	R445Q		OncoKB: Unknown, level NA, resistance NA;CIViC: NA;MyCancerGenome: not present;CancerHotspot: no;3DHotspot: no	Missense_Mutation	18	48603033	48603033	Pan-Cancer Atlas (PanCanAtlas)
Colorectal Adenocarcinoma (TCGA, PanCancer Atlas)	TCGA-F4-6569-01	Colorectal Cancer	Colon Adenocarcinoma	G386S	Likely_pathogenic	OncoKB: Likely Oncogenic, level NA, resistance NA;CIViC: NA;MyCancerGenome: not present;CancerHotspot: yes;3DHotspot: yes	Missense_Mutation	18	48593405	48593405	Pan-Cancer Atlas (PanCanAtlas)
Colorectal Adenocarcinoma (TCGA, PanCancer Atlas)	TCGA-F4-6805-01	Colorectal Cancer	Colon Adenocarcinoma	R361C	Pathogenic	OncoKB: Likely Oncogenic, level NA, resistance NA;CIViC: diagnosticCount: 0, predictiveCount: 0, prognosticCount: 0, predisposingCount: 1, oncogenicCount: 0, functionalCount: 2;MyCancerGenome: present;CancerHotspot: yes;3DHotspot: yes	Missense_Mutation	18	48591918	48591918	Pan-Cancer Atlas (PanCanAtlas)
Colorectal Adenocarcinoma (TCGA, PanCancer Atlas)	TCGA-F4-6855-01	Colorectal Cancer	Colon Adenocarcinoma	S178*	Pathogenic	OncoKB: Likely Oncogenic, level NA, resistance NA;CIViC: NA;MyCancerGenome: not present;CancerHotspot: no;3DHotspot: no	Nonsense_Mutation	18	48581229	48581229	Pan-Cancer Atlas (PanCanAtlas)
Colorectal Adenocarcinoma (TCGA, PanCancer Atlas)	TCGA-F5-6864-01	Colorectal Cancer	Rectal Adenocarcinoma	D537E		OncoKB: Likely Oncogenic, level NA, resistance NA;CIViC: NA;MyCancerGenome: present;CancerHotspot: yes;3DHotspot: no	Missense_Mutation	18	48604789	48604789	Pan-Cancer Atlas (PanCanAtlas)
Colorectal Adenocarcinoma (TCGA, PanCancer Atlas)	TCGA-G4-6304-01	Colorectal Cancer	Colon Adenocarcinoma	R441C	Uncertain_significance	OncoKB: Unknown, level NA, resistance NA;CIViC: NA;MyCancerGenome: not present;CancerHotspot: no;3DHotspot: no	Missense_Mutation	18	48603020	48603020	Pan-Cancer Atlas (PanCanAtlas)
Colorectal Adenocarcinoma (TCGA, PanCancer Atlas)	TCGA-G4-6309-01	Colorectal Cancer	Colon Adenocarcinoma	G231Afs*10	Pathogenic	OncoKB: Likely Oncogenic, level NA, resistance NA;CIViC: NA;MyCancerGenome: not present;CancerHotspot: no;3DHotspot: no	Frame_Shift_Del	18	48584514	48584514	Pan-Cancer Atlas (PanCanAtlas)
Colorectal Adenocarcinoma (TCGA, PanCancer Atlas)	TCGA-G4-6322-01	Colorectal Cancer	Mucinous Adenocarcinoma of the Colon and Rectum	R361H	Pathogenic	OncoKB: Likely Oncogenic, level NA, resistance NA;CIViC: NA;MyCancerGenome: present;CancerHotspot: yes;3DHotspot: yes	Missense_Mutation	18	48591919	48591919	Pan-Cancer Atlas (PanCanAtlas)
Colorectal Adenocarcinoma (TCGA, PanCancer Atlas)	TCGA-G4-6628-01	Colorectal Cancer	Colon Adenocarcinoma	R361C	Pathogenic	OncoKB: Likely Oncogenic, level NA, resistance NA;CIViC: diagnosticCount: 0, predictiveCount: 0, prognosticCount: 0, predisposingCount: 1, oncogenicCount: 0, functionalCount: 2;MyCancerGenome: present;CancerHotspot: yes;3DHotspot: yes	Missense_Mutation	18	48591918	48591918	Pan-Cancer Atlas (PanCanAtlas)
Colorectal Adenocarcinoma (TCGA, PanCancer Atlas)	TCGA-G4-6628-01	Colorectal Cancer	Colon Adenocarcinoma	W302*	Pathogenic	OncoKB: Likely Oncogenic, level NA, resistance NA;CIViC: NA;MyCancerGenome: not present;CancerHotspot: no;3DHotspot: no	Nonsense_Mutation	18	48586237	48586237	Pan-Cancer Atlas (PanCanAtlas)
Colorectal Adenocarcinoma (TCGA, PanCancer Atlas)	TCGA-QG-A5YX-01	Colorectal Cancer	Colon Adenocarcinoma	L540Pfs*10		OncoKB: Likely Oncogenic, level NA, resistance NA;CIViC: NA;MyCancerGenome: not present;CancerHotspot: no;3DHotspot: no	Frame_Shift_Del	18	48604794	48604800	Pan-Cancer Atlas (PanCanAtlas)
Colorectal Adenocarcinoma Triplets (MSK, Genome Biol 2014)	EV-006-P	Colorectal Cancer	Colorectal Adenocarcinoma	D537G	Uncertain_significance	OncoKB: Likely Oncogenic, level NA, resistance NA;CIViC: NA;MyCancerGenome: present;CancerHotspot: yes;3DHotspot: no	Missense_Mutation	18	48604788	48604788	doi： 10.1186/s13059-014-0454-7.
Colorectal Adenocarcinoma Triplets (MSK, Genome Biol 2014)	EV-012-P	Colorectal Cancer	Colorectal Adenocarcinoma	L540H		OncoKB: Unknown, level NA, resistance NA;CIViC: NA;MyCancerGenome: not present;CancerHotspot: no;3DHotspot: no	Missense_Mutation	18	48604797	48604797	doi： 10.1186/s13059-014-0454-7.
Colorectal Adenocarcinoma Triplets (MSK, Genome Biol 2014)	EV-014-P	Colorectal Cancer	Colorectal Adenocarcinoma	R361H	Pathogenic	OncoKB: Likely Oncogenic, level NA, resistance NA;CIViC: NA;MyCancerGenome: present;CancerHotspot: yes;3DHotspot: yes	Missense_Mutation	18	48591919	48591919	doi： 10.1186/s13059-014-0454-7.
Colorectal Adenocarcinoma Triplets (MSK, Genome Biol 2014)	EV-048-P	Colorectal Cancer	Colorectal Adenocarcinoma	G386D	Pathogenic/Likely_pathogenic	OncoKB: Likely Oncogenic, level NA, resistance NA;CIViC: diagnosticCount: 0, predictiveCount: 0, prognosticCount: 0, predisposingCount: 0, oncogenicCount: 0, functionalCount: 1;MyCancerGenome: not present;CancerHotspot: yes;3DHotspot: yes	Missense_Mutation	18	48593406	48593406	doi： 10.1186/s13059-014-0454-7.
Colorectal Adenocarcinoma Triplets (MSK, Genome Biol 2014)	EV-051-P	Colorectal Cancer	Colorectal Adenocarcinoma	G419V		OncoKB: Likely Oncogenic, level NA, resistance NA;CIViC: diagnosticCount: 0, predictiveCount: 0, prognosticCount: 0, predisposingCount: 0, oncogenicCount: 0, functionalCount: 1;MyCancerGenome: not present;CancerHotspot: yes;3DHotspot: no	Missense_Mutation	18	48593505	48593505	doi： 10.1186/s13059-014-0454-7.
Colorectal Adenocarcinoma Triplets (MSK, Genome Biol 2014)	EV-056-P	Colorectal Cancer	Colorectal Adenocarcinoma	S325F		OncoKB: Unknown, level NA, resistance NA;CIViC: NA;MyCancerGenome: not present;CancerHotspot: no;3DHotspot: no	Missense_Mutation	18	48591811	48591811	doi： 10.1186/s13059-014-0454-7.
[truncated: 179 more rows]

## Sheet: TableS9
Table S9: Comparison of pathogenic mutation frequencies between CRC and CRC-PM
[truncated: 23 more rows]

[truncated: 4 more sheets: Table S10, Table S11, Table S12, Table S13]
